# Supplementary material for: Exploring the Microbial Mosaic: Insights into Composition, Diversity, and Environmental Drivers in the Pearl River Estuary Sediments
Source: Preprints.org preprint supplement (doi:10.20944/preprints202405.0478.v1), 2024-05-08
Supplement: Supplementary file 1 [file supplementary]

## Supplementary figures and tables.

**Table S1:** Coordinates of sampled sites

| Site name | Bottom depth (m) | Longitude (N) | Latitude (E) |
|-----------|------------------|---------------|--------------|
| A02       | 62               | 21.501        | 114.252      |
| A01b      | 41               | 21.751        | 114.123      |
| A01       | 33               | 22.001        | 113.998      |
| P03       | 24               | 21.997        | 113.851      |
| P02       | 16               | 21.994        | 113.698      |

**Table S4:** Effect of the site and core depth and on sediment microbiota. PREMANOVA factorial test results.

|           | Factor            | F      | R <sup>2</sup> | P       |
|-----------|-------------------|--------|----------------|---------|
| Archaea   | Site              | 5.5577 | 0.29761        | < 0.001 |
|           | Core_Depth        | 3.5172 | 0.09417        | < 0.001 |
|           | Site X Core_Depth | 1.929  | 0.2066         | < 0.001 |
| Bacteria  | Site              | 8.8792 | 0.40901        | < 0.001 |
|           | Core_Depth        | 4.0425 | 0.09311        | < 0.001 |
|           | Site X Core_Depth | 1.6541 | 0.15239        | < 0.005 |
| Eukaryota | Site              | 4.1156 | 0.2381         | < 0.001 |
|           | Core_Depth        | 3.684  | 0.10657        | < 0.001 |
|           | Site X Core_Depth | 1.9136 | 0.22142        | < 0.001 |

**Table S5:** Effect of the site and core depth and on sediment microbiota. The factors were examined by a pairwise multilevel comparison using Adonis test.

|           | Site X Site |     | R <sup>2</sup> | F      | P     | Bonferroni |
|-----------|-------------|-----|----------------|--------|-------|------------|
| Archaea   | A01b        | A01 | 0.18527        | 3.6385 | 0.001 | 0.01       |
|           | A01b        | P03 | 0.16709        | 3.2098 | 0.001 | 0.01       |
|           | A01b        | P02 | 0.19382        | 3.8467 | 0.001 | 0.01       |
|           | A01b        | A02 | 0.13232        | 2.44   | 0.014 | 0.14       |
|           | A01         | P03 | 0.24913        | 5.3085 | 0.001 | 0.01       |
|           | A01         | P02 | 0.22696        | 4.6975 | 0.001 | 0.01       |
|           | A01         | A02 | 0.34039        | 8.2568 | 0.001 | 0.01       |
|           | P03         | P02 | 0.16877        | 3.2487 | 0.001 | 0.01       |
|           | P03         | A02 | 0.17867        | 3.4805 | 0.001 | 0.01       |
|           | P02         | A02 | 0.28371        | 6.3373 | 0.001 | 0.01       |
|           |             |     |                |        |       |            |
| Bacteria  | A01b        | A01 | 0.31442        | 7.338  | 0.001 | 0.01       |
|           | A01b        | P03 | 0.22471        | 4.6376 | 0.001 | 0.01       |
|           | A01b        | P02 | 0.32478        | 7.696  | 0.001 | 0.01       |
|           | A01b        | A02 | 0.25382        | 5.4424 | 0.001 | 0.01       |
|           | A01         | P03 | 0.24379        | 5.1581 | 0.001 | 0.01       |
|           | A01         | P02 | 0.236          | 4.9424 | 0.001 | 0.01       |
|           | A01         | A02 | 0.45977        | 13.617 | 0.001 | 0.01       |
|           | P03         | P02 | 0.18476        | 3.626  | 0.001 | 0.01       |
|           | P03         | A02 | 0.29622        | 6.7344 | 0.001 | 0.01       |
|           | P02         | A02 | 0.45397        | 13.302 | 0.001 | 0.01       |
|           |             |     |                |        |       |            |
| Eukaryota | A01b        | A01 | 0.18392        | 3.6059 | 0.001 | 0.01       |
|           | A01b        | P03 | 0.15063        | 2.8374 | 0.001 | 0.01       |
|           | A01b        | P02 | 0.20342        | 4.0859 | 0.001 | 0.01       |
|           | A01b        | A02 | 0.12983        | 2.3872 | 0.003 | 0.03       |
|           | A01         | P03 | 0.14131        | 2.633  | 0.002 | 0.02       |
|           | A01         | P02 | 0.14781        | 2.7752 | 0.004 | 0.04       |
|           | A01         | A02 | 0.22092        | 4.5369 | 0.001 | 0.01       |
|           | P03         | P02 | 0.1306         | 2.4035 | 0.001 | 0.01       |
|           | P03         | A02 | 0.13288        | 2.4519 | 0.001 | 0.01       |
|           | P02         | A02 | 0.2087         | 4.2198 | 0.001 | 0.01       |

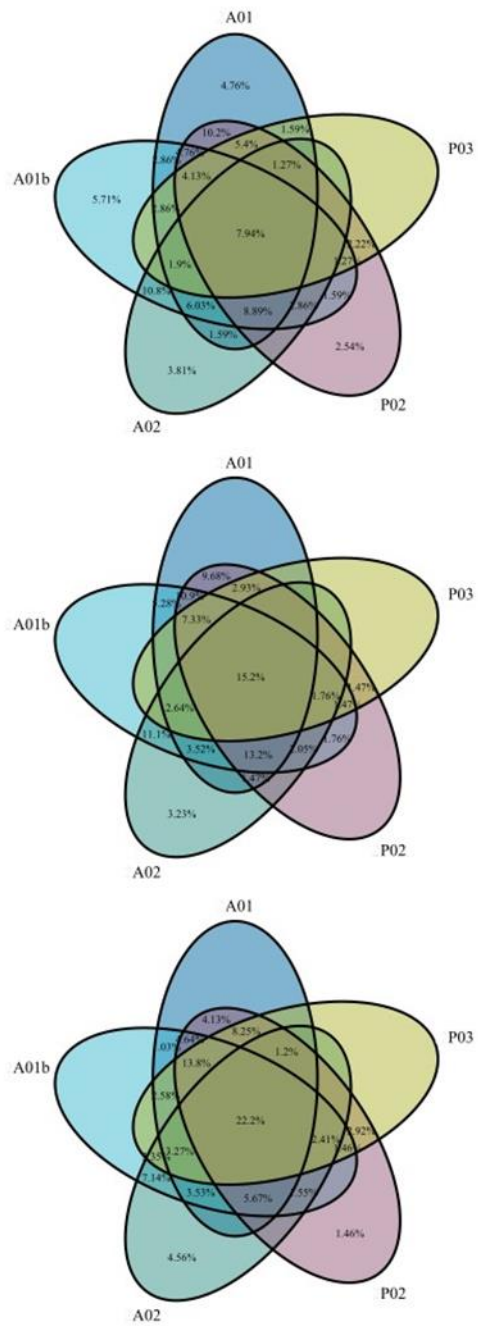

**Figure S1:** Venn diagrams indicating the distribution of unique and shared microbial ASVs between the sites. ASVs with prevalence >10% of samples were included. Only values above 1% are shown.

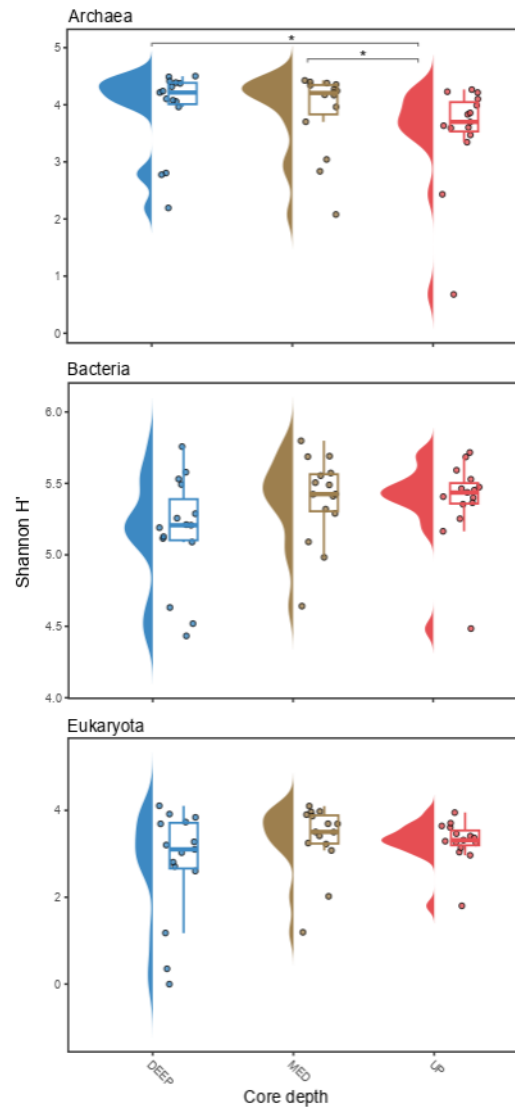

**Figure S2:** Boxplot presenting the distribution of Shannon H' index of diversity within each site at each kingdom.
