# Supplementary material for: Exploring the Microbial Mosaic: Insights into Composition, Diversity, and Environmental Drivers in the Pearl River Estuary Sediments
Source: Preprints.org preprint supplement (doi:10.20944/preprints202405.0478.v1), 2024-05-08
Supplement: Supplementary file 1 [file supplementary]

## Sheet: Table S6a
Table S6a: Taxonomy and raw read counts for Archaea samples.
A_ASV	Kingdom	Phylum	Class	Order	Family	Genus	Species		A01b_0_1	A01b_1_2	A01b_2_3	A01b_6_7	A01b_7_8	A01b_8_9	A01b_16_18	A01b_18_20	A01b_20_25	A01_0_1	A01_1_2	A01_2_3	A01_6_7	A01_7_8	A01_8_9	A01_15_17	A01_17_19	A01_19_24	P03_0_1	P03_1_2	P03_2_3	P03_5_6	P03_6_7	P03_7_8	P03_10_12	P03_12_14	P03_14_16	P02_0_1	P02_1_2	P02_2_3	P02_6_7	P02_7_8	P02_8_9	P02_16_18	P02_18_20	P02_20_25	A02_0_1	A02_1_2	A02_2_3	A02_6_7	A02_7_8
A_ASV00001	Archaea	Crenarchaeota	Nitrososphaeria	Nitrosopumilales	Nitrosopumilaceae	Candidatus Nitrosopumilus	Un_Candidatus Nitrosopumilus		1149	2264	1785	994	731	424	207	305	209	1094	1434	1651	1515	1304	1419	622	799	536	1187	1320	0	0	0	0	0	0	0	409	441	417	354	402	452	184	0	0	1053	1060	1081	383	405
A_ASV00002	Archaea	Crenarchaeota	Nitrososphaeria	Nitrosopumilales	Nitrosopumilaceae	Candidatus Nitrosopumilus	Un_Candidatus Nitrosopumilus		849	994	745	702	789	468	194	397	336	1069	1440	1298	1894	1473	1427	1353	1213	925	826	844	0	1047	0	161	857	0	0	371	457	575	308	350	330	151	0	0	328	480	508	164	216
A_ASV00003	Archaea	Crenarchaeota	Bathyarchaeia	Un_Bathyarchaeia	Un_Bathyarchaeia	Un_Bathyarchaeia	Un_Bathyarchaeia		668	487	338	0	245	338	730	773	1136	870	478	411	631	579	446	495	430	354	580	0	0	0	681	632	0	0	2219	533	456	580	470	510	598	691	1588	1429	313	243	253	0	353
A_ASV00004	Archaea	Crenarchaeota	Bathyarchaeia	Un_Bathyarchaeia	Un_Bathyarchaeia	Un_Bathyarchaeia	Un_Bathyarchaeia		349	211	154	323	677	524	944	800	283	303	250	214	437	316	413	336	251	264	150	0	1162	249	842	0	0	0	1072	223	277	373	328	285	249	733	849	272	268	196	161	698	1028
A_ASV00005	Archaea	Crenarchaeota	Nitrososphaeria	Nitrosopumilales	Nitrosopumilaceae	Candidatus Nitrosopumilus	Un_Candidatus Nitrosopumilus		380	673	492	167	107	0	0	97	0	0	0	0	0	0	0	0	0	0	0	0	0	0	0	0	0	0	0	0	0	0	0	0	0	0	0	0	2336	2516	2562	557	553
A_ASV00007	Archaea	Crenarchaeota	Bathyarchaeia	Un_Bathyarchaeia	Un_Bathyarchaeia	Un_Bathyarchaeia	Un_Bathyarchaeia		266	191	120	188	283	232	331	325	160	338	241	297	451	329	313	276	231	293	117	0	0	0	0	0	0	0	0	266	210	338	419	283	282	369	458	324	232	0	147	313	432
A_ASV00008	Archaea	Crenarchaeota	Nitrososphaeria	Nitrosopumilales	Nitrosopumilaceae	Candidatus Nitrosopumilus	Un_Candidatus Nitrosopumilus		698	906	420	329	223	170	97	146	0	214	206	247	284	257	184	98	98	87	345	160	0	0	0	0	3580	0	0	0	0	0	0	0	0	0	0	0	317	332	361	0	186
A_ASV00009	Archaea	Crenarchaeota	Bathyarchaeia	Un_Bathyarchaeia	Un_Bathyarchaeia	Un_Bathyarchaeia	Un_Bathyarchaeia		128	119	90	72	45	0	0	176	232	133	115	128	141	181	60	61	0	0	456	0	0	1374	0	265	1322	1180	1717	156	104	176	154	150	0	0	132	578	0	0	0	0	0
A_ASV00010	Archaea	Crenarchaeota	Nitrososphaeria	Nitrosopumilales	Nitrosopumilaceae	Candidatus Nitrosopumilus	Un_Candidatus Nitrosopumilus		672	822	339	240	214	229	167	204	205	193	159	260	230	319	211	128	127	100	222	0	0	0	0	0	0	0	0	85	0	0	0	0	0	0	0	0	939	892	908	396	404
A_ASV00011	Archaea	Crenarchaeota	Nitrososphaeria	Nitrosopumilales	Nitrosopumilaceae	Candidatus Nitrosopumilus	Un_Candidatus Nitrosopumilus		545	789	664	311	316	154	0	0	0	470	549	384	394	366	376	203	267	190	200	1071	0	0	0	12	0	0	0	206	148	173	138	168	171	0	0	0	393	432	330	0	0
A_ASV00012	Archaea	Crenarchaeota	Bathyarchaeia	Un_Bathyarchaeia	Un_Bathyarchaeia	Un_Bathyarchaeia	Un_Bathyarchaeia		101	128	60	0	193	258	215	264	209	151	119	127	154	185	183	163	143	170	100	0	0	646	0	1789	613	0	464	179	235	256	323	256	251	393	185	87	0	53	0	0	347
A_ASV00013	Archaea	Crenarchaeota	Bathyarchaeia	Un_Bathyarchaeia	Un_Bathyarchaeia	Un_Bathyarchaeia	Un_Bathyarchaeia		0	69	52	111	55	159	73	151	0	207	256	194	118	211	232	163	220	258	107	0	0	1643	0	0	0	0	0	308	430	510	504	356	363	774	809	686	0	0	0	0	0
A_ASV00014	Archaea	Crenarchaeota	Bathyarchaeia	Un_Bathyarchaeia	Un_Bathyarchaeia	Un_Bathyarchaeia	Un_Bathyarchaeia		180	209	115	187	267	270	275	382	128	252	332	198	398	467	362	327	297	332	0	0	0	4	0	0	0	0	0	267	316	308	403	371	333	475	587	532	30	0	41	18	93
A_ASV00015	Archaea	Asgardarchaeota	Lokiarchaeia	Lokiarchaeia	Lokiarchaeia	Lokiarchaeia	Lokiarchaeia		145	168	106	174	204	231	342	473	165	221	146	270	0	257	193	243	181	142	175	0	0	929	0	0	0	0	0	234	260	207	167	269	293	52	397	74	104	231	141	158	320
A_ASV00016	Archaea	Crenarchaeota	Bathyarchaeia	Un_Bathyarchaeia	Un_Bathyarchaeia	Un_Bathyarchaeia	Un_Bathyarchaeia		0	0	0	0	97	206	173	229	0	151	117	0	286	167	147	204	158	132	0	0	0	0	0	1830	0	0	2589	149	130	182	264	148	181	424	256	107	0	0	0	0	0
A_ASV00017	Archaea	Crenarchaeota	Nitrososphaeria	Nitrosopumilales	Nitrosopumilaceae	Candidatus Nitrosopumilus	Un_Candidatus Nitrosopumilus		466	973	771	323	218	121	0	0	0	342	658	445	533	450	509	190	259	151	171	0	0	0	0	0	0	0	0	103	167	131	0	0	0	0	0	88	352	342	459	0	0
A_ASV00018	Archaea	Halobacterota	Methanosarcinia	Methanosarciniales	Methanosarcinaceae	Methanococcoides	Un_Methanococcoides		0	53	32	104	586	306	94	191	129	126	93	113	290	124	355	133	118	254	0	0	0	0	0	0	0	0	0	169	229	203	585	850	394	474	969	66	0	24	0	389	21
A_ASV00019	Archaea	Crenarchaeota	Bathyarchaeia	Un_Bathyarchaeia	Un_Bathyarchaeia	Un_Bathyarchaeia	Un_Bathyarchaeia		0	0	0	0	0	0	92	0	0	0	0	0	121	121	0	137	0	0	0	0	0	1725	697	662	0	0	1749	118	257	180	215	157	182	198	1186	0	0	0	0	0	0
A_ASV00020	Archaea	Crenarchaeota	Bathyarchaeia	Un_Bathyarchaeia	Un_Bathyarchaeia	Un_Bathyarchaeia	Un_Bathyarchaeia		110	57	0	204	271	239	381	317	153	0	0	0	120	0	95	77	0	0	0	0	0	632	0	0	0	0	0	0	0	114	0	93	0	252	567	180	170	0	62	619	629
A_ASV00021	Archaea	Crenarchaeota	Bathyarchaeia	Un_Bathyarchaeia	Un_Bathyarchaeia	Un_Bathyarchaeia	Un_Bathyarchaeia		93	100	32	144	208	139	164	181	78	91	81	52	137	162	100	105	68	59	90	0	0	1709	0	0	987	0	0	164	169	172	141	158	101	190	0	35	119	34	47	215	219
A_ASV00022	Archaea	Asgardarchaeota	Lokiarchaeia	Lokiarchaeia	Lokiarchaeia	Lokiarchaeia	Lokiarchaeia		0	0	0	256	178	251	246	316	0	146	0	0	177	169	103	97	112	0	172	0	0	123	0	0	305	0	0	113	124	115	151	172	193	282	1531	545	120	76	0	134	334
A_ASV00023	Archaea	Crenarchaeota	Bathyarchaeia	Un_Bathyarchaeia	Un_Bathyarchaeia	Un_Bathyarchaeia	Un_Bathyarchaeia		69	51	73	0	122	64	222	293	197	98	89	90	54	78	0	0	58	73	0	0	0	0	0	0	0	1952	554	125	111	115	141	92	128	224	252	248	84	0	0	0	0
A_ASV00024	Archaea	Crenarchaeota	Bathyarchaeia	Un_Bathyarchaeia	Un_Bathyarchaeia	Un_Bathyarchaeia	Un_Bathyarchaeia		106	0	0	0	0	0	123	57	0	0	0	0	0	101	0	90	37	0	0	0	0	0	0	1397	0	0	0	199	189	408	314	243	240	604	1435	840	0	0	0	0	0
A_ASV00025	Archaea	Asgardarchaeota	Lokiarchaeia	Lokiarchaeia	Lokiarchaeia	Lokiarchaeia	Lokiarchaeia		204	93	120	209	261	209	159	233	347	319	160	275	219	258	336	400	295	269	147	0	0	0	0	0	0	0	0	263	225	211	272	268	273	159	0	52	0	0	0	0	70
A_ASV00026	Archaea	Crenarchaeota	Bathyarchaeia	Un_Bathyarchaeia	Un_Bathyarchaeia	Un_Bathyarchaeia	Un_Bathyarchaeia		85	58	0	0	0	33	0	0	266	0	0	89	0	122	0	62	0	0	152	1882	0	493	0	0	0	0	1151	97	94	108	120	88	101	157	134	185	67	17	0	0	0
A_ASV00027	Archaea	Crenarchaeota	Bathyarchaeia	Un_Bathyarchaeia	Un_Bathyarchaeia	Un_Bathyarchaeia	Un_Bathyarchaeia		0	0	0	0	34	38	34	36	60	17	0	0	43	44	0	37	0	0	0	0	871	1243	0	0	0	78	1878	31	0	30	0	0	49	116	393	158	0	0	0	190	63
A_ASV00028	Archaea	Crenarchaeota	Bathyarchaeia	Un_Bathyarchaeia	Un_Bathyarchaeia	Un_Bathyarchaeia	Un_Bathyarchaeia		68	72	0	84	0	134	248	211	111	64	65	0	78	68	73	101	72	65	19	0	0	0	0	0	0	1363	0	62	42	47	63	72	76	197	0	119	108	47	52	198	286
A_ASV00029	Archaea	Thermoplasmatota	Thermoplasmata	Marine Benthic Group D and DHVEG-1	Un_Marine Benthic Group D and DHVEG-1	Un_Marine Benthic Group D and DHVEG-1	Un_Marine Benthic Group D and DHVEG-1		0	0	0	91	127	161	142	111	167	154	0	271	191	340	254	319	352	305	0	0	0	0	0	0	0	0	0	252	253	295	380	354	390	127	228	0	20	0	0	0	59
A_ASV00030	Archaea	Crenarchaeota	Nitrososphaeria	Nitrosopumilales	Nitrosopumilaceae	Candidatus Nitrosopumilus	Un_Candidatus Nitrosopumilus		819	716	388	278	189	155	118	0	0	311	195	264	189	243	160	113	125	143	266	232	0	0	0	0	0	0	0	0	0	0	0	0	0	0	0	0	194	154	122	113	0
A_ASV00031	Archaea	Crenarchaeota	Bathyarchaeia	Un_Bathyarchaeia	Un_Bathyarchaeia	Un_Bathyarchaeia	Un_Bathyarchaeia		0	47	34	46	107	102	154	383	133	48	0	42	94	65	52	51	37	61	31	0	0	0	0	622	617	0	689	41	50	105	80	91	54	244	333	142	57	0	22	0	121
A_ASV00032	Archaea	Asgardarchaeota	Lokiarchaeia	Lokiarchaeia	Lokiarchaeia	Lokiarchaeia	Lokiarchaeia		73	133	76	92	125	126	138	167	78	238	140	185	156	149	204	271	221	153	140	0	0	0	0	0	0	0	0	161	139	135	162	232	209	259	202	185	0	0	50	65	114
A_ASV00033	Archaea	Crenarchaeota	Bathyarchaeia	Un_Bathyarchaeia	Un_Bathyarchaeia	Un_Bathyarchaeia	Un_Bathyarchaeia		0	83	41	39	136	125	289	280	167	88	0	65	114	71	63	79	60	49	96	0	0	780	558	147	0	0	60	109	80	47	69	71	67	0	0	0	72	41	0	68	251
A_ASV00034	Archaea	Crenarchaeota	Bathyarchaeia	Un_Bathyarchaeia	Un_Bathyarchaeia	Un_Bathyarchaeia	Un_Bathyarchaeia		186	0	0	0	0	0	0	231	398	0	0	181	0	170	151	0	0	0	146	0	0	0	0	652	1537	928	0	0	0	0	0	0	0	297	0	0	0	0	0	0	0
A_ASV00035	Archaea	Thermoplasmatota	Thermoplasmata	Marine Benthic Group D and DHVEG-1	Un_Marine Benthic Group D and DHVEG-1	Un_Marine Benthic Group D and DHVEG-1	Un_Marine Benthic Group D and DHVEG-1		68	40	26	59	126	227	277	41	102	131	103	121	181	107	262	310	435	353	73	0	0	0	0	0	0	0	0	163	127	149	385	234	203	312	84	0	0	0	0	0	70
A_ASV00036	Archaea	Crenarchaeota	Bathyarchaeia	Un_Bathyarchaeia	Un_Bathyarchaeia	Un_Bathyarchaeia	Un_Bathyarchaeia		0	0	0	101	201	173	109	223	0	175	130	121	207	210	127	139	146	133	0	0	0	366	0	0	0	0	0	164	226	290	201	181	167	0	0	262	63	0	0	161	159
A_ASV00037	Archaea	Halobacterota	Methanosarcinia	Methanosarciniales	Methanosarcinaceae	Un_Methanosarcinaceae	Un_Methanosarcinaceae		0	19	0	81	303	226	150	214	206	33	0	0	56	126	230	120	111	121	0	0	0	0	0	0	0	0	0	0	0	38	418	71	87	374	0	0	38	21	68	847	114
A_ASV00039	Archaea	Crenarchaeota	Bathyarchaeia	Un_Bathyarchaeia	Un_Bathyarchaeia	Un_Bathyarchaeia	Un_Bathyarchaeia		150	0	51	156	248	192	165	0	0	175	108	166	170	179	222	152	91	95	339	0	0	0	0	272	0	0	0	236	244	167	185	142	155	221	375	0	42	0	0	48	82
A_ASV00040	Archaea	Crenarchaeota	Bathyarchaeia	Un_Bathyarchaeia	Un_Bathyarchaeia	Un_Bathyarchaeia	Un_Bathyarchaeia		161	119	81	163	244	187	250	90	0	103	79	0	0	180	0	112	140	0	0	0	0	0	0	0	0	1169	0	0	109	0	116	0	120	0	0	142	123	0	96	169	253
A_ASV00042	Archaea	Crenarchaeota	Bathyarchaeia	Un_Bathyarchaeia	Un_Bathyarchaeia	Un_Bathyarchaeia	Un_Bathyarchaeia		0	0	0	0	132	0	0	73	0	0	0	0	65	51	50	0	60	0	0	346	0	0	669	0	0	0	1882	102	0	193	143	95	109	233	233	140	0	0	0	0	0
A_ASV00043	Archaea	Crenarchaeota	Nitrososphaeria	Nitrosopumilales	Nitrosopumilaceae	Candidatus Nitrosopumilus	Un_Candidatus Nitrosopumilus		281	228	0	105	97	80	0	0	0	203	246	146	0	206	187	185	132	109	283	212	0	240	0	210	0	0	0	121	102	0	0	81	61	0	0	0	167	126	217	0	181
A_ASV00044	Archaea	Thermoplasmatota	Thermoplasmata	Marine Benthic Group D and DHVEG-1	Un_Marine Benthic Group D and DHVEG-1	Un_Marine Benthic Group D and DHVEG-1	Un_Marine Benthic Group D and DHVEG-1		0	0	0	0	69	0	0	0	153	70	40	77	94	0	137	167	180	138	0	0	0	0	0	0	0	0	0	210	194	203	621	409	391	596	520	139	0	0	0	0	0
A_ASV00045	Archaea	Crenarchaeota	Nitrososphaeria	Nitrosopumilales	Nitrosopumilaceae	Candidatus Nitrosopumilus	Un_Candidatus Nitrosopumilus		343	447	372	263	326	115	0	104	0	0	0	0	0	0	0	0	0	0	0	0	0	0	0	0	0	0	0	0	0	0	0	0	0	0	0	0	487	492	649	155	173
A_ASV00046	Archaea	Crenarchaeota	Bathyarchaeia	Un_Bathyarchaeia	Un_Bathyarchaeia	Un_Bathyarchaeia	Un_Bathyarchaeia		0	0	0	0	0	7	0	0	0	0	0	0	0	0	0	0	0	0	0	0	0	0	839	0	977	192	1381	0	0	0	0	0	11	180	456	326	0	0	0	0	0
A_ASV00047	Archaea	Asgardarchaeota	Lokiarchaeia	Lokiarchaeia	Lokiarchaeia	Lokiarchaeia	Lokiarchaeia		69	89	50	81	81	107	198	106	105	195	100	90	0	93	156	198	171	193	173	0	0	0	0	0	0	0	0	136	166	139	193	148	252	0	476	0	0	0	0	135	89
A_ASV00048	Archaea	Thermoplasmatota	Thermoplasmata	Marine Benthic Group D and DHVEG-1	Un_Marine Benthic Group D and DHVEG-1	Un_Marine Benthic Group D and DHVEG-1	Un_Marine Benthic Group D and DHVEG-1		0	0	0	0	0	0	0	0	87	0	0	0	68	40	0	0	44	39	0	0	0	0	0	0	0	3753	0	0	0	0	0	0	0	0	0	0	0	0	0	0	42
A_ASV00049	Archaea	Asgardarchaeota	Lokiarchaeia	Lokiarchaeia	Lokiarchaeia	Lokiarchaeia	Lokiarchaeia		128	67	0	0	118	118	0	118	0	153	0	126	0	0	180	191	222	229	0	0	0	0	505	0	0	0	0	134	187	125	283	222	197	159	566	191	0	0	0	0	0
A_ASV00050	Archaea	Crenarchaeota	Bathyarchaeia	Un_Bathyarchaeia	Un_Bathyarchaeia	Un_Bathyarchaeia	Un_Bathyarchaeia		0	0	0	0	0	0	76	0	0	0	0	0	23	0	0	0	0	0	0	0	0	0	0	0	3596	0	0	23	0	0	0	0	37	0	0	170	0	0	0	0	27
A_ASV00051	Archaea	Nanoarchaeota	Nanoarchaeia	Woesearchaeales	Un_Woesearchaeales	Un_Woesearchaeales	Un_Woesearchaeales		0	0	0	0	0	0	0	0	0	0	0	0	0	0	0	0	0	0	0	0	3930	0	0	0	0	0	0	0	0	0	0	0	0	0	0	0	0	0	0	0	0
A_ASV00052	Archaea	Thermoplasmatota	Thermoplasmata	Marine Benthic Group D and DHVEG-1	Un_Marine Benthic Group D and DHVEG-1	Un_Marine Benthic Group D and DHVEG-1	Un_Marine Benthic Group D and DHVEG-1		0	0	0	0	0	0	0	25	97	23	37	43	41	26	50	48	0	24	0	0	0	2449	0	0	0	0	0	38	57	0	0	81	101	412	278	0	0	0	0	0	0
A_ASV00053	Archaea	Thermoplasmatota	Thermoplasmata	Marine Benthic Group D and DHVEG-1	Un_Marine Benthic Group D and DHVEG-1	Un_Marine Benthic Group D and DHVEG-1	Un_Marine Benthic Group D and DHVEG-1		0	0	0	56	133	100	301	154	0	0	113	0	132	0	212	229	315	200	0	0	0	0	0	0	0	0	0	0	96	149	289	204	252	130	201	237	0	0	0	0	93
A_ASV00054	Archaea	Iainarchaeota	Iainarchaeia	Iainarchaeales	Candidatus Iainarchaeum	Un_Candidatus Iainarchaeum	Un_Candidatus Iainarchaeum		0	0	0	0	0	0	0	0	0	0	0	0	0	0	0	0	0	0	0	0	3772	0	0	0	0	0	0	0	0	0	0	0	0	0	0	0	0	0	0	0	0
A_ASV00056	Archaea	Crenarchaeota	Bathyarchaeia	Un_Bathyarchaeia	Un_Bathyarchaeia	Un_Bathyarchaeia	Un_Bathyarchaeia		33	0	15	0	0	38	76	0	105	0	0	0	0	16	0	0	0	0	0	0	0	0	0	0	0	0	3035	0	0	0	23	0	0	25	0	0	0	0	0	26	40
A_ASV00057	Archaea	Un_Archaea	Un_Archaea	Un_Archaea	Un_Archaea	Un_Archaea	Un_Archaea		0	0	0	0	0	0	0	0	0	0	0	0	0	0	0	0	0	0	0	0	0	0	0	0	3530	0	0	0	0	0	0	23	31	0	0	0	0	0	0	0	0
A_ASV00058	Archaea	Crenarchaeota	Nitrososphaeria	Nitrosopumilales	Nitrosopumilaceae	Candidatus Nitrosopumilus	Un_Candidatus Nitrosopumilus		0	123	83	0	0	0	140	99	0	0	113	74	146	131	100	143	99	0	0	425	0	0	0	233	0	0	0	0	0	0	0	0	0	0	0	123	121	165	227	178	200
A_ASV00059	Archaea	Crenarchaeota	Nitrososphaeria	Nitrosopumilales	Nitrosopumilaceae	Un_Nitrosopumilaceae	Un_Nitrosopumilaceae		229	298	192	220	150	103	93	82	95	0	0	0	0	0	0	0	0	0	0	0	0	0	0	0	0	0	0	0	0	0	0	0	0	0	0	0	362	268	314	171	157
A_ASV00060	Archaea	Nanoarchaeota	Nanoarchaeia	Woesearchaeales	Un_Woesearchaeales	Un_Woesearchaeales	Un_Woesearchaeales		0	0	0	0	0	0	0	0	0	0	0	0	0	0	0	0	0	0	0	0	3369	0	0	0	0	0	0	0	0	0	0	0	0	0	0	0	0	0	0	0	0
A_ASV00061	Archaea	Crenarchaeota	Nitrososphaeria	Nitrosopumilales	Nitrosopumilaceae	Candidatus Nitrosopelagicus	Un_Candidatus Nitrosopelagicus		104	103	77	0	0	50	56	0	0	0	0	0	0	0	0	0	0	0	0	0	0	0	0	0	0	0	0	0	0	0	0	0	0	0	0	0	358	459	522	459	318
A_ASV00062	Archaea	Crenarchaeota	Bathyarchaeia	Un_Bathyarchaeia	Un_Bathyarchaeia	Un_Bathyarchaeia	Un_Bathyarchaeia		111	0	0	0	87	123	158	160	0	0	0	0	80	81	0	63	0	0	0	0	0	0	0	571	1073	0	0	0	79	107	0	0	76	0	178	135	0	0	0	0	105
A_ASV00063	Archaea	Crenarchaeota	Nitrososphaeria	Nitrosopumilales	Nitrosopumilaceae	Candidatus Nitrosopumilus	Un_Candidatus Nitrosopumilus		0	94	0	0	64	0	0	0	0	106	78	78	66	68	98	59	51	39	133	0	0	0	13	2257	0	0	0	0	0	0	30	0	0	0	0	0	0	0	0	0	0
A_ASV00064	Archaea	Crenarchaeota	Nitrososphaeria	Nitrosopumilales	Nitrosopumilaceae	Candidatus Nitrosopumilus	Un_Candidatus Nitrosopumilus		243	695	218	93	53	16	0	0	0	87	195	59	98	72	103	33	47	46	0	0	0	0	0	0	0	0	0	25	20	0	11	24	14	0	0	0	375	413	260	0	0
A_ASV00065	Archaea	Thermoplasmatota	Thermoplasmata	Marine Benthic Group D and DHVEG-1	Un_Marine Benthic Group D and DHVEG-1	Un_Marine Benthic Group D and DHVEG-1	Un_Marine Benthic Group D and DHVEG-1		0	13	17	0	0	0	54	185	78	31	84	62	68	84	99	138	180	121	0	0	0	0	0	0	0	0	716	26	86	97	217	167	190	0	484	0	0	0	0	0	0
A_ASV00066	Archaea	Crenarchaeota	Bathyarchaeia	Un_Bathyarchaeia	Un_Bathyarchaeia	Un_Bathyarchaeia	Un_Bathyarchaeia		0	0	0	60	85	0	51	0	61	0	0	0	0	0	0	0	0	0	0	0	0	0	0	0	1051	0	1244	0	0	0	0	0	0	206	162	159	0	0	0	0	0
A_ASV00067	Archaea	Crenarchaeota	Nitrososphaeria	Nitrosopumilales	Nitrosopumilaceae	Un_Nitrosopumilaceae	Un_Nitrosopumilaceae		0	0	0	0	0	0	0	0	0	0	0	0	0	0	0	0	0	0	0	3026	0	0	0	0	0	0	0	0	0	0	0	0	0	0	0	0	0	0	0	0	0
A_ASV00068	Archaea	Crenarchaeota	Nitrososphaeria	Nitrosopumilales	Nitrosopumilaceae	Un_Nitrosopumilaceae	Un_Nitrosopumilaceae		0	0	0	0	0	0	0	0	0	0	0	0	0	0	0	0	0	0	0	0	0	0	0	0	0	0	3014	0	0	0	0	0	0	0	0	0	0	0	0	0	0
A_ASV00069	Archaea	Thermoplasmatota	Thermoplasmata	Marine Benthic Group D and DHVEG-1	Un_Marine Benthic Group D and DHVEG-1	Un_Marine Benthic Group D and DHVEG-1	Un_Marine Benthic Group D and DHVEG-1		0	0	0	0	0	0	0	0	182	53	0	75	0	0	0	0	0	0	0	1203	0	0	0	0	0	0	0	0	0	0	0	0	0	525	836	0	0	0	0	0	0
A_ASV00070	Archaea	Crenarchaeota	Nitrososphaeria	Nitrosopumilales	Nitrosopumilaceae	Candidatus Nitrosopumilus	Un_Candidatus Nitrosopumilus		188	309	210	102	0	0	0	0	0	0	0	0	0	0	0	0	0	0	0	0	0	0	0	0	0	0	0	0	0	0	0	0	0	0	0	0	538	629	633	0	104
A_ASV00071	Archaea	Thermoplasmatota	Thermoplasmata	Marine Benthic Group D and DHVEG-1	Un_Marine Benthic Group D and DHVEG-1	Un_Marine Benthic Group D and DHVEG-1	Un_Marine Benthic Group D and DHVEG-1		0	0	0	0	0	0	0	0	0	0	0	0	0	0	0	0	0	0	0	0	0	0	0	2820	0	0	0	0	0	0	0	0	0	0	0	0	0	0	0	0	0
A_ASV00072	Archaea	Thermoplasmatota	Thermoplasmata	Marine Benthic Group D and DHVEG-1	Un_Marine Benthic Group D and DHVEG-1	Un_Marine Benthic Group D and DHVEG-1	Un_Marine Benthic Group D and DHVEG-1		0	0	0	0	0	117	278	0	0	26	68	0	48	51	140	163	256	166	0	0	0	0	0	0	0	0	0	0	0	121	166	203	282	0	0	235	0	0	0	0	145
A_ASV00073	Archaea	Crenarchaeota	Bathyarchaeia	Un_Bathyarchaeia	Un_Bathyarchaeia	Un_Bathyarchaeia	Un_Bathyarchaeia		0	65	0	83	97	0	152	212	167	0	0	0	0	125	0	62	0	0	0	0	0	0	0	0	134	0	0	0	0	0	0	0	0	0	0	130	131	0	0	0	161
A_ASV00075	Archaea	Crenarchaeota	Nitrososphaeria	Nitrosopumilales	Nitrosopumilaceae	Candidatus Nitrosopumilus	Un_Candidatus Nitrosopumilus		116	123	77	119	0	55	0	98	0	181	211	182	294	241	186	223	214	188	82	0	0	0	0	0	0	0	0	60	0	0	0	0	0	0	0	0	0	0	0	0	0
A_ASV00076	Archaea	Crenarchaeota	Bathyarchaeia	Un_Bathyarchaeia	Un_Bathyarchaeia	Un_Bathyarchaeia	Un_Bathyarchaeia		72	60	0	124	195	98	115	78	0	139	0	0	0	0	0	0	0	0	0	0	0	123	0	0	628	0	0	0	0	0	0	0	0	0	0	0	58	88	57	383	159
A_ASV00078	Archaea	Thermoplasmatota	Thermoplasmata	Un_Thermoplasmata	Un_Thermoplasmata	Un_Thermoplasmata	Un_Thermoplasmata		0	0	0	0	0	0	0	0	0	0	0	0	0	0	0	23	16	0	0	0	0	0	0	2548	0	0	0	0	0	39	0	0	0	0	0	0	0	0	0	0	0
A_ASV00079	Archaea	Crenarchaeota	Bathyarchaeia	Un_Bathyarchaeia	Un_Bathyarchaeia	Un_Bathyarchaeia	Un_Bathyarchaeia		0	53	0	0	72	92	163	124	153	0	0	59	0	85	0	88	0	0	0	0	0	0	0	872	0	0	0	68	83	0	0	154	106	166	223	0	0	0	0	0	0
A_ASV00080	Archaea	Thermoplasmatota	Thermoplasmata	Un_Thermoplasmata	Un_Thermoplasmata	Un_Thermoplasmata	Un_Thermoplasmata		0	0	0	53	0	0	102	0	0	0	0	0	157	59	0	0	0	76	0	0	0	710	0	0	1299	0	0	0	0	0	0	0	59	0	77	0	0	0	0	0	0
A_ASV00081	Archaea	Crenarchaeota	Bathyarchaeia	Un_Bathyarchaeia	Un_Bathyarchaeia	Un_Bathyarchaeia	Un_Bathyarchaeia		0	0	0	0	0	0	0	0	0	0	0	0	0	0	0	0	0	0	0	0	0	0	0	0	2370	0	0	0	0	0	0	0	0	0	180	0	0	0	0	0	0
A_ASV00082	Archaea	Thermoplasmatota	Thermoplasmata	Marine Benthic Group D and DHVEG-1	Un_Marine Benthic Group D and DHVEG-1	Un_Marine Benthic Group D and DHVEG-1	Un_Marine Benthic Group D and DHVEG-1		0	0	0	0	0	0	0	0	0	0	0	0	0	0	0	0	0	0	0	0	2539	0	0	0	0	0	0	0	0	0	0	0	0	0	0	0	0	0	0	0	0
A_ASV00083	Archaea	Crenarchaeota	Bathyarchaeia	Un_Bathyarchaeia	Un_Bathyarchaeia	Un_Bathyarchaeia	Un_Bathyarchaeia		0	0	0	0	0	0	0	0	0	0	0	0	0	0	0	0	0	0	0	0	0	0	0	0	852	588	1073	0	0	0	0	0	0	0	0	0	0	0	0	0	0
A_ASV00084	Archaea	Crenarchaeota	Bathyarchaeia	Un_Bathyarchaeia	Un_Bathyarchaeia	Un_Bathyarchaeia	Un_Bathyarchaeia		0	0	0	0	0	0	0	0	0	0	0	0	0	0	0	0	0	0	0	0	0	0	0	0	0	2498	0	0	0	0	0	0	0	0	0	0	0	0	0	0	0
A_ASV00085	Archaea	Halobacterota	Methanosarcinia	Methanosarciniales	Methanosarcinaceae	Methanococcoides	Un_Methanococcoides		0	0	0	0	183	112	0	0	0	82	0	0	152	94	214	86	0	87	0	0	0	0	0	0	0	0	0	77	86	135	733	211	86	0	0	158	0	0	0	0	0
A_ASV00086	Archaea	Crenarchaeota	Bathyarchaeia	Un_Bathyarchaeia	Un_Bathyarchaeia	Un_Bathyarchaeia	Un_Bathyarchaeia		0	0	98	0	0	0	0	0	0	0	0	131	70	108	60	88	141	184	78	0	0	0	843	0	0	0	0	0	101	0	119	98	99	55	77	128	0	0	0	0	0
A_ASV00087	Archaea	Crenarchaeota	Bathyarchaeia	Un_Bathyarchaeia	Un_Bathyarchaeia	Un_Bathyarchaeia	Un_Bathyarchaeia		0	0	0	0	0	0	0	0	0	48	0	0	0	79	45	58	0	33	54	0	0	1983	0	0	0	0	0	0	0	34	0	61	79	0	0	0	0	0	0	0	0
A_ASV00088	Archaea	Un_Archaea	Un_Archaea	Un_Archaea	Un_Archaea	Un_Archaea	Un_Archaea		0	0	0	0	0	0	0	0	0	0	0	0	0	0	0	0	0	0	0	0	0	0	2449	0	0	0	0	0	0	0	0	0	0	0	0	0	0	0	0	0	0
A_ASV00089	Archaea	Crenarchaeota	Bathyarchaeia	Un_Bathyarchaeia	Un_Bathyarchaeia	Un_Bathyarchaeia	Un_Bathyarchaeia		0	0	0	0	0	29	67	119	44	0	0	0	42	30	0	0	0	0	0	0	0	899	0	480	0	0	0	0	19	29	24	29	0	142	189	130	0	0	0	0	19
A_ASV00091	Archaea	Asgardarchaeota	Lokiarchaeia	Lokiarchaeia	Lokiarchaeia	Lokiarchaeia	Lokiarchaeia		0	52	94	0	0	0	151	0	0	83	41	88	132	120	101	159	151	142	0	0	0	0	0	0	0	0	0	148	115	111	156	187	171	190	0	0	0	0	0	0	0
A_ASV00092	Archaea	Crenarchaeota	Bathyarchaeia	Un_Bathyarchaeia	Un_Bathyarchaeia	Un_Bathyarchaeia	Un_Bathyarchaeia		0	39	17	0	114	110	109	93	0	0	0	0	50	33	0	0	0	0	73	0	0	1598	0	0	0	0	0	0	62	0	27	0	0	0	0	0	0	0	0	0	0
A_ASV00093	Archaea	Halobacterota	Methanosarcinia	Methanosarciniales	Methanosarcinaceae	Methanosarcina	Un_Methanosarcina		0	0	0	0	0	0	0	0	0	0	0	0	0	0	0	0	0	0	82	0	0	0	0	0	0	0	2157	0	0	0	83	0	0	0	0	0	0	0	0	0	0
A_ASV00094	Archaea	Asgardarchaeota	Odinarchaeia	Un_Odinarchaeia	Un_Odinarchaeia	Un_Odinarchaeia	Un_Odinarchaeia		0	0	0	0	0	0	0	0	0	0	0	0	0	0	0	0	0	0	0	0	0	2315	0	0	0	0	0	0	0	0	0	0	0	0	0	0	0	0	0	0	0
A_ASV00095	Archaea	Un_Archaea	Un_Archaea	Un_Archaea	Un_Archaea	Un_Archaea	Un_Archaea		45	0	0	96	109	0	164	183	0	101	60	0	0	0	0	127	128	102	0	0	0	0	0	0	0	0	0	131	112	103	224	0	184	160	0	275	0	0	0	0	0
A_ASV00097	Archaea	Crenarchaeota	Bathyarchaeia	Un_Bathyarchaeia	Un_Bathyarchaeia	Un_Bathyarchaeia	Un_Bathyarchaeia		0	28	0	0	0	20	0	65	0	0	0	0	33	0	0	0	0	0	57	0	0	584	0	0	0	0	0	96	0	96	91	104	129	0	659	0	0	0	0	0	67
A_ASV00098	Archaea	Nanoarchaeota	Nanoarchaeia	Woesearchaeales	Un_Woesearchaeales	Un_Woesearchaeales	Un_Woesearchaeales		0	0	0	0	0	0	0	0	0	0	0	0	0	0	0	0	0	0	0	0	0	2247	0	0	0	0	0	0	0	0	0	0	0	0	0	0	0	0	0	0	0
A_ASV00099	Archaea	Nanoarchaeota	Nanoarchaeia	Woesearchaeales	Un_Woesearchaeales	Un_Woesearchaeales	Un_Woesearchaeales		0	0	0	0	0	0	0	0	0	0	0	0	0	0	25	0	0	0	0	2117	0	0	0	0	0	0	0	32	0	26	0	0	0	0	0	0	0	0	0	0	0
A_ASV00100	Archaea	Crenarchaeota	Bathyarchaeia	Un_Bathyarchaeia	Un_Bathyarchaeia	Un_Bathyarchaeia	Un_Bathyarchaeia		0	0	0	0	0	0	0	0	0	0	0	0	0	0	0	0	0	0	0	0	0	0	0	0	2190	0	0	0	0	0	0	0	0	0	0	0	0	0	0	0	0
A_ASV00103	Archaea	Crenarchaeota	Nitrososphaeria	Nitrosopumilales	Nitrosopumilaceae	Candidatus Nitrosopumilus	Un_Candidatus Nitrosopumilus		223	319	206	92	0	70	0	113	0	91	0	96	98	0	0	0	0	0	0	0	0	0	0	0	0	0	0	0	0	0	0	0	0	0	0	0	253	233	183	0	92
A_ASV00104	Archaea	Crenarchaeota	Nitrososphaeria	Caldiarchaeales	Geothermarchaeaceae	Un_Geothermarchaeaceae	Un_Geothermarchaeaceae		0	0	0	0	0	0	14	0	0	0	0	0	0	0	0	0	0	0	0	0	0	0	0	2118	0	0	0	0	0	0	0	0	0	0	0	0	0	0	0	0	0
A_ASV00106	Archaea	Thermoplasmatota	Thermoplasmata	Marine Benthic Group D and DHVEG-1	Un_Marine Benthic Group D and DHVEG-1	Un_Marine Benthic Group D and DHVEG-1	Un_Marine Benthic Group D and DHVEG-1		0	0	0	0	0	0	0	0	0	81	83	0	69	122	163	182	322	242	0	0	0	0	0	0	0	0	0	0	120	0	245	253	202	0	0	0	0	0	0	0	0
A_ASV00107	Archaea	Crenarchaeota	Nitrososphaeria	Nitrosopumilales	Nitrosopumilaceae	Candidatus Nitrosopumilus	Un_Candidatus Nitrosopumilus		104	133	104	0	0	0	0	0	0	85	136	140	123	102	126	0	112	78	71	758	0	0	0	0	0	0	0	0	0	0	0	0	0	0	0	0	0	0	0	0	0
A_ASV00108	Archaea	Crenarchaeota	Nitrososphaeria	Nitrosopumilales	Nitrosopumilaceae	Candidatus Nitrosopumilus	Un_Candidatus Nitrosopumilus		0	0	0	0	0	0	0	0	0	82	174	96	138	159	126	118	108	71	43	617	0	0	0	0	0	0	0	0	66	100	64	0	47	32	0	0	0	0	0	0	0
A_ASV00109	Archaea	Crenarchaeota	Bathyarchaeia	Un_Bathyarchaeia	Un_Bathyarchaeia	Un_Bathyarchaeia	Un_Bathyarchaeia		0	0	0	0	32	0	40	94	27	0	0	33	55	27	0	0	0	0	0	0	0	0	0	0	902	0	0	0	22	0	63	42	53	113	491	0	0	0	0	0	0
A_ASV00110	Archaea	Crenarchaeota	Bathyarchaeia	Un_Bathyarchaeia	Un_Bathyarchaeia	Un_Bathyarchaeia	Un_Bathyarchaeia		0	0	0	0	0	0	0	0	0	0	0	0	0	0	0	0	0	24	0	0	0	0	0	1691	0	0	0	81	36	0	0	70	0	0	0	113	0	0	0	0	0
A_ASV00111	Archaea	Crenarchaeota	Nitrososphaeria	Nitrosopumilales	Nitrosopumilaceae	Candidatus Nitrosopumilus	Un_Candidatus Nitrosopumilus		194	238	264	81	66	0	0	0	0	0	0	0	0	0	0	0	0	0	0	0	0	0	0	0	0	0	0	0	0	0	0	0	0	0	0	0	179	285	306	0	85
A_ASV00113	Archaea	Crenarchaeota	Bathyarchaeia	Un_Bathyarchaeia	Un_Bathyarchaeia	Un_Bathyarchaeia	Un_Bathyarchaeia		0	0	0	0	0	0	0	0	0	0	0	0	0	0	0	0	0	0	0	0	0	0	0	194	0	1757	0	0	0	0	0	0	0	0	0	0	0	0	0	0	0
A_ASV00114	Archaea	Thermoplasmatota	Thermoplasmata	Marine Benthic Group D and DHVEG-1	Un_Marine Benthic Group D and DHVEG-1	Un_Marine Benthic Group D and DHVEG-1	Un_Marine Benthic Group D and DHVEG-1		0	0	0	0	0	0	0	0	0	60	76	101	108	67	170	226	231	262	0	0	0	0	0	0	0	0	0	0	81	83	171	161	144	0	0	0	0	0	0	0	0
A_ASV00115	Archaea	Crenarchaeota	Bathyarchaeia	Un_Bathyarchaeia	Un_Bathyarchaeia	Un_Bathyarchaeia	Un_Bathyarchaeia		0	0	0	0	0	0	0	0	0	0	0	0	0	0	0	0	0	0	0	0	0	0	0	0	0	0	1939	0	0	0	0	0	0	0	0	0	0	0	0	0	0
A_ASV00116	Archaea	Crenarchaeota	Bathyarchaeia	Un_Bathyarchaeia	Un_Bathyarchaeia	Un_Bathyarchaeia	Un_Bathyarchaeia		0	20	0	0	79	0	221	167	57	43	0	0	0	0	51	46	21	0	140	0	0	0	0	0	0	0	0	43	49	70	69	70	0	331	347	0	0	0	35	0	0
A_ASV00117	Archaea	Crenarchaeota	Bathyarchaeia	Un_Bathyarchaeia	Un_Bathyarchaeia	Un_Bathyarchaeia	Un_Bathyarchaeia		0	0	0	25	91	0	0	116	90	91	0	0	0	63	0	0	0	0	0	0	0	0	0	0	0	0	0	51	75	0	0	78	95	168	190	0	54	0	0	58	84
A_ASV00118	Archaea	Crenarchaeota	Bathyarchaeia	Un_Bathyarchaeia	Un_Bathyarchaeia	Un_Bathyarchaeia	Un_Bathyarchaeia		75	56	37	0	40	48	52	112	67	39	57	0	0	61	0	50	44	0	44	0	0	0	0	0	0	0	0	60	50	76	85	0	0	71	150	0	69	0	54	50	88
A_ASV00119	Archaea	Crenarchaeota	Bathyarchaeia	Un_Bathyarchaeia	Un_Bathyarchaeia	Un_Bathyarchaeia	Un_Bathyarchaeia		0	0	0	0	0	0	0	0	0	79	77	0	0	0	139	63	86	0	135	0	0	0	0	0	0	0	0	84	99	112	109	95	191	355	273	0	0	0	0	0	0
A_ASV00120	Archaea	Asgardarchaeota	Lokiarchaeia	Lokiarchaeia	Lokiarchaeia	Lokiarchaeia	Lokiarchaeia		26	0	0	47	54	42	84	42	0	43	0	38	46	137	96	84	76	87	149	0	0	0	0	0	0	0	0	48	58	73	95	129	91	151	0	0	0	0	0	0	0
A_ASV00122	Archaea	Hadarchaeota	Hadarchaeia	Hadarchaeales	Un_Hadarchaeales	Un_Hadarchaeales	Un_Hadarchaeales		0	0	0	0	0	0	0	0	0	0	0	0	12	0	0	0	0	0	0	0	0	0	0	0	0	0	1822	0	0	0	0	0	0	0	0	0	0	0	0	0	0
A_ASV00123	Archaea	Crenarchaeota	Nitrososphaeria	Nitrosopumilales	Nitrosopumilaceae	Un_Nitrosopumilaceae	Un_Nitrosopumilaceae		52	42	53	0	0	0	0	0	64	0	0	0	0	0	0	0	0	0	0	0	0	0	0	0	0	0	0	0	0	0	0	0	0	0	0	0	233	268	268	120	66
A_ASV00124	Archaea	Crenarchaeota	Bathyarchaeia	Un_Bathyarchaeia	Un_Bathyarchaeia	Un_Bathyarchaeia	Un_Bathyarchaeia		0	0	0	0	0	0	0	0	0	0	0	0	0	0	0	0	0	0	0	0	0	0	0	0	0	1594	0	0	0	0	0	0	38	89	0	0	60	0	0	0	0
A_ASV00125	Archaea	Crenarchaeota	Bathyarchaeia	Un_Bathyarchaeia	Un_Bathyarchaeia	Un_Bathyarchaeia	Un_Bathyarchaeia		0	0	0	0	0	0	0	0	0	0	0	0	0	0	0	0	0	0	0	0	0	1774	0	0	0	0	0	0	0	0	0	0	0	0	0	0	0	0	0	0	0
A_ASV00126	Archaea	Crenarchaeota	Bathyarchaeia	Un_Bathyarchaeia	Un_Bathyarchaeia	Un_Bathyarchaeia	Un_Bathyarchaeia		0	0	0	0	0	0	64	0	0	0	0	0	0	0	0	0	0	0	0	0	0	627	0	579	0	0	0	0	0	0	0	0	0	0	294	101	0	0	0	0	0
A_ASV00127	Archaea	Crenarchaeota	Bathyarchaeia	Un_Bathyarchaeia	Un_Bathyarchaeia	Un_Bathyarchaeia	Un_Bathyarchaeia		0	0	0	46	0	43	0	28	0	60	52	69	94	125	134	69	113	70	0	0	0	0	0	0	0	0	0	103	112	159	182	101	64	0	125	0	0	0	0	0	0
A_ASV00129	Archaea	Crenarchaeota	Bathyarchaeia	Un_Bathyarchaeia	Un_Bathyarchaeia	Un_Bathyarchaeia	Un_Bathyarchaeia		0	0	0	0	0	0	0	0	63	0	0	0	0	0	0	0	0	0	36	0	0	0	0	0	1456	0	0	0	0	0	0	0	9	38	38	78	0	0	0	0	0
A_ASV00130	Archaea	Crenarchaeota	Bathyarchaeia	Un_Bathyarchaeia	Un_Bathyarchaeia	Un_Bathyarchaeia	Un_Bathyarchaeia		0	0	0	0	0	0	0	0	0	0	0	0	0	0	0	0	0	0	0	0	0	0	0	0	1079	0	0	0	0	20	0	5	16	186	0	395	0	0	0	0	0
A_ASV00132	Archaea	Crenarchaeota	Nitrososphaeria	Nitrosopumilales	Nitrosopumilaceae	Un_Nitrosopumilaceae	Un_Nitrosopumilaceae		118	108	88	0	0	0	0	0	0	0	0	0	0	0	0	0	0	0	0	0	0	0	0	0	0	0	0	0	0	0	0	0	0	0	0	0	282	231	285	105	143
A_ASV00133	Archaea	Crenarchaeota	Bathyarchaeia	Un_Bathyarchaeia	Un_Bathyarchaeia	Un_Bathyarchaeia	Un_Bathyarchaeia		0	0	0	48	95	91	87	69	0	0	0	43	112	57	90	93	102	95	0	0	0	0	0	0	0	0	0	16	45	65	94	71	66	0	0	153	0	0	8	0	45
A_ASV00134	Archaea	Crenarchaeota	Bathyarchaeia	Un_Bathyarchaeia	Un_Bathyarchaeia	Un_Bathyarchaeia	Un_Bathyarchaeia		0	0	0	0	0	0	0	0	0	0	0	0	0	0	0	0	0	0	0	0	0	0	0	0	1685	0	0	0	0	0	0	0	0	0	0	0	0	0	0	0	0
A_ASV00135	Archaea	Thermoplasmatota	Thermoplasmata	Marine Benthic Group D and DHVEG-1	Un_Marine Benthic Group D and DHVEG-1	Un_Marine Benthic Group D and DHVEG-1	Un_Marine Benthic Group D and DHVEG-1		0	26	0	19	0	0	73	0	0	0	47	48	60	51	74	85	84	56	71	0	0	0	0	0	0	0	0	68	77	32	92	81	115	166	0	164	0	0	0	0	0
A_ASV00136	Archaea	Crenarchaeota	Bathyarchaeia	Un_Bathyarchaeia	Un_Bathyarchaeia	Un_Bathyarchaeia	Un_Bathyarchaeia		0	0	0	0	0	0	0	0	0	0	0	0	0	0	0	0	0	0	93	0	0	0	0	1576	0	0	0	0	0	0	0	0	0	0	0	0	0	0	0	0	0
A_ASV00137	Archaea	Crenarchaeota	Bathyarchaeia	Un_Bathyarchaeia	Un_Bathyarchaeia	Un_Bathyarchaeia	Un_Bathyarchaeia		45	0	0	9	0	40	82	133	97	26	0	0	0	32	0	30	0	18	0	0	0	0	0	0	0	0	0	48	0	34	40	0	0	0	347	70	22	0	0	0	123
A_ASV00138	Archaea	Crenarchaeota	Bathyarchaeia	Un_Bathyarchaeia	Un_Bathyarchaeia	Un_Bathyarchaeia	Un_Bathyarchaeia		0	0	0	0	0	0	0	0	0	0	0	0	0	0	0	0	0	0	0	0	0	849	0	0	0	0	811	0	0	0	0	0	0	0	0	0	0	0	0	0	0
A_ASV00139	Archaea	Crenarchaeota	Bathyarchaeia	Un_Bathyarchaeia	Un_Bathyarchaeia	Un_Bathyarchaeia	Un_Bathyarchaeia		0	0	0	0	0	0	0	0	0	0	0	0	0	0	0	0	0	0	0	0	0	0	0	0	0	1660	0	0	0	0	0	0	0	0	0	0	0	0	0	0	0
A_ASV00140	Archaea	Thermoplasmatota	Thermoplasmata	Marine Benthic Group D and DHVEG-1	Un_Marine Benthic Group D and DHVEG-1	Un_Marine Benthic Group D and DHVEG-1	Un_Marine Benthic Group D and DHVEG-1		0	19	0	0	30	59	57	76	0	19	35	45	59	27	86	95	196	139	0	0	0	0	0	0	0	0	0	0	66	74	239	107	56	0	116	0	0	0	0	0	0
A_ASV00142	Archaea	Crenarchaeota	Bathyarchaeia	Un_Bathyarchaeia	Un_Bathyarchaeia	Un_Bathyarchaeia	Un_Bathyarchaeia		0	0	0	0	0	0	0	0	0	0	0	0	0	0	0	0	0	0	0	0	0	0	0	0	0	0	1598	0	0	0	0	0	0	0	0	0	0	0	0	0	0
A_ASV00141	Archaea	Thermoplasmatota	Thermoplasmata	Marine Benthic Group D and DHVEG-1	Un_Marine Benthic Group D and DHVEG-1	Un_Marine Benthic Group D and DHVEG-1	Un_Marine Benthic Group D and DHVEG-1		0	0	0	0	0	0	0	0	0	0	0	0	0	0	0	0	0	0	0	0	0	0	0	1598	0	0	0	0	0	0	0	0	0	0	0	0	0	0	0	0	0
A_ASV00143	Archaea	Crenarchaeota	Bathyarchaeia	Un_Bathyarchaeia	Un_Bathyarchaeia	Un_Bathyarchaeia	Un_Bathyarchaeia		0	0	0	0	0	0	0	0	146	0	0	0	0	0	0	0	0	0	0	0	0	0	1418	0	0	0	0	0	0	0	0	0	0	0	0	0	0	0	0	0	0
A_ASV00144	Archaea	Crenarchaeota	Nitrososphaeria	Caldiarchaeales	Geothermarchaeaceae	Un_Geothermarchaeaceae	Un_Geothermarchaeaceae		0	0	0	0	0	0	0	0	0	0	0	0	0	0	0	0	0	0	0	0	0	0	0	1555	0	0	0	0	0	0	0	0	0	0	0	0	0	0	0	0	0
A_ASV00145	Archaea	Crenarchaeota	Bathyarchaeia	Un_Bathyarchaeia	Un_Bathyarchaeia	Un_Bathyarchaeia	Un_Bathyarchaeia		0	0	0	0	0	0	0	21	0	0	0	0	0	0	0	0	0	0	0	974	0	513	0	0	0	0	0	0	0	0	0	0	0	0	0	0	0	0	0	0	0
A_ASV00146	Archaea	Crenarchaeota	Bathyarchaeia	Un_Bathyarchaeia	Un_Bathyarchaeia	Un_Bathyarchaeia	Un_Bathyarchaeia		107	0	0	0	0	0	0	0	0	0	0	64	0	0	0	72	0	0	0	0	0	0	0	0	0	1108	195	0	0	0	0	0	0	0	0	0	0	0	0	0	0
A_ASV00147	Archaea	Crenarchaeota	Bathyarchaeia	Un_Bathyarchaeia	Un_Bathyarchaeia	Un_Bathyarchaeia	Un_Bathyarchaeia		34	0	0	0	26	0	54	16	0	0	14	14	0	0	0	0	17	0	0	0	0	0	0	1202	0	0	0	0	0	0	45	0	0	0	0	123	0	0	0	0	0
A_ASV00148	Archaea	Crenarchaeota	Bathyarchaeia	Un_Bathyarchaeia	Un_Bathyarchaeia	Un_Bathyarchaeia	Un_Bathyarchaeia		0	0	0	0	0	0	0	0	0	0	0	0	0	0	0	0	0	0	0	0	0	0	0	1541	0	0	0	0	0	0	0	0	0	0	0	0	0	0	0	0	0
A_ASV00149	Archaea	Thermoplasmatota	Thermoplasmata	Un_Thermoplasmata	Un_Thermoplasmata	Un_Thermoplasmata	Un_Thermoplasmata		0	0	0	0	112	105	0	0	0	86	58	69	0	103	190	147	156	0	0	0	0	0	0	0	0	0	0	58	0	80	137	98	0	0	0	133	0	0	0	0	0
A_ASV00150	Archaea	Crenarchaeota	Bathyarchaeia	Un_Bathyarchaeia	Un_Bathyarchaeia	Un_Bathyarchaeia	Un_Bathyarchaeia		0	0	0	0	0	0	0	0	57	0	0	0	0	0	0	0	0	0	0	0	0	0	1272	0	0	0	0	0	0	0	0	0	0	0	197	0	0	0	0	0	0
A_ASV00152	Archaea	Crenarchaeota	Bathyarchaeia	Un_Bathyarchaeia	Un_Bathyarchaeia	Un_Bathyarchaeia	Un_Bathyarchaeia		0	0	0	0	0	0	0	0	0	0	0	0	0	0	0	0	0	0	0	0	0	0	0	0	0	0	1512	0	0	0	0	0	0	0	0	0	0	0	0	0	0
A_ASV00154	Archaea	Crenarchaeota	Nitrososphaeria	Nitrosopumilales	Nitrosopumilaceae	Un_Nitrosopumilaceae	Un_Nitrosopumilaceae		66	86	56	39	37	21	0	46	0	0	0	0	0	0	0	0	0	0	0	0	0	0	0	0	0	0	0	0	0	0	0	0	0	0	0	0	231	207	246	84	115
A_ASV00155	Archaea	Thermoplasmatota	Thermoplasmata	Marine Benthic Group D and DHVEG-1	Un_Marine Benthic Group D and DHVEG-1	Un_Marine Benthic Group D and DHVEG-1	Un_Marine Benthic Group D and DHVEG-1		0	0	0	33	0	0	0	125	118	0	50	58	0	63	86	80	106	76	0	0	0	0	0	0	0	0	0	0	15	63	98	94	120	174	0	0	0	0	0	0	0
A_ASV00157	Archaea	Un_Archaea	Un_Archaea	Un_Archaea	Un_Archaea	Un_Archaea	Un_Archaea		0	0	0	60	0	49	108	105	0	0	0	0	0	0	105	81	0	78	0	0	0	0	0	0	0	354	0	53	0	61	76	0	77	0	0	0	29	0	0	0	75
A_ASV00158	Archaea	Nanoarchaeota	Nanoarchaeia	Woesearchaeales	Un_Woesearchaeales	Un_Woesearchaeales	Un_Woesearchaeales		0	0	0	0	0	0	0	0	0	0	0	0	0	0	0	0	0	0	0	0	0	1463	0	0	0	0	0	0	0	0	0	0	0	0	0	0	0	0	0	0	0
A_ASV00159	Archaea	Crenarchaeota	Bathyarchaeia	Un_Bathyarchaeia	Un_Bathyarchaeia	Un_Bathyarchaeia	Un_Bathyarchaeia		0	0	0	37	52	55	96	95	85	0	68	28	43	56	48	108	66	76	0	0	0	0	0	0	0	0	0	0	0	0	0	86	61	0	0	195	0	0	0	0	57
A_ASV00160	Archaea	Crenarchaeota	Bathyarchaeia	Un_Bathyarchaeia	Un_Bathyarchaeia	Un_Bathyarchaeia	Un_Bathyarchaeia		0	0	0	0	0	0	0	0	0	0	0	0	0	0	0	0	0	0	0	0	0	0	0	0	0	0	1458	0	0	0	0	0	0	0	0	0	0	0	0	0	0
A_ASV00161	Archaea	Crenarchaeota	Bathyarchaeia	Un_Bathyarchaeia	Un_Bathyarchaeia	Un_Bathyarchaeia	Un_Bathyarchaeia		0	0	0	0	68	0	0	0	0	0	0	0	0	0	0	0	0	0	0	0	0	0	0	1099	0	0	0	0	0	0	0	0	0	0	0	223	0	0	0	0	0
A_ASV00162	Archaea	Crenarchaeota	Bathyarchaeia	Un_Bathyarchaeia	Un_Bathyarchaeia	Un_Bathyarchaeia	Un_Bathyarchaeia		0	0	0	0	0	0	0	0	0	0	0	0	0	0	0	0	0	0	0	0	0	0	0	0	0	1324	0	0	0	0	0	0	0	0	53	75	0	0	0	0	0
A_ASV00163	Archaea	Asgardarchaeota	Lokiarchaeia	Lokiarchaeia	Lokiarchaeia	Lokiarchaeia	Lokiarchaeia		0	0	0	0	0	62	0	0	0	95	0	63	0	68	90	130	94	127	69	0	0	0	0	0	0	0	0	81	65	39	140	126	82	0	0	0	0	0	0	0	50
A_ASV00164	Archaea	Crenarchaeota	Bathyarchaeia	Un_Bathyarchaeia	Un_Bathyarchaeia	Un_Bathyarchaeia	Un_Bathyarchaeia		40	0	0	0	0	37	45	30	70	38	0	0	0	0	0	0	0	0	0	0	0	0	0	0	272	0	0	0	0	0	0	0	49	142	0	282	0	0	0	0	40
A_ASV00165	Archaea	Crenarchaeota	Bathyarchaeia	Un_Bathyarchaeia	Un_Bathyarchaeia	Un_Bathyarchaeia	Un_Bathyarchaeia		0	56	0	0	0	0	0	64	44	78	0	71	0	0	0	0	0	0	0	0	0	0	0	0	1041	0	0	0	0	0	0	0	0	0	0	76	0	0	0	0	0
A_ASV00166	Archaea	Crenarchaeota	Bathyarchaeia	Un_Bathyarchaeia	Un_Bathyarchaeia	Un_Bathyarchaeia	Un_Bathyarchaeia		79	0	0	0	0	0	0	0	0	0	0	0	0	0	0	0	0	0	0	0	0	1250	0	0	0	0	0	0	0	0	0	0	0	85	0	0	0	0	0	0	0
A_ASV00168	Archaea	Crenarchaeota	Nitrososphaeria	Marine Benthic Group A	Un_Marine Benthic Group A	Un_Marine Benthic Group A	Un_Marine Benthic Group A		0	0	0	0	0	0	29	0	0	0	0	0	11	0	14	11	19	9	0	0	0	0	0	1290	0	0	0	0	0	0	0	0	0	0	0	0	0	0	0	0	0
A_ASV00171	Archaea	Crenarchaeota	Bathyarchaeia	Un_Bathyarchaeia	Un_Bathyarchaeia	Un_Bathyarchaeia	Un_Bathyarchaeia		0	0	0	0	0	0	0	0	0	0	0	0	0	0	0	0	0	0	0	0	0	0	1382	0	0	0	0	0	0	0	0	0	0	0	0	0	0	0	0	0	0
A_ASV00172	Archaea	Crenarchaeota	Bathyarchaeia	Un_Bathyarchaeia	Un_Bathyarchaeia	Un_Bathyarchaeia	Un_Bathyarchaeia		0	0	0	0	0	0	0	0	230	0	0	0	0	0	0	0	0	0	0	0	0	131	0	0	0	0	0	209	155	120	150	146	140	88	0	0	0	0	0	0	0
A_ASV00173	Archaea	Thermoplasmatota	Thermoplasmata	Marine Benthic Group D and DHVEG-1	Un_Marine Benthic Group D and DHVEG-1	Un_Marine Benthic Group D and DHVEG-1	Un_Marine Benthic Group D and DHVEG-1		0	0	0	0	64	82	77	162	88	30	0	63	0	0	0	0	0	22	0	0	0	0	0	0	0	0	0	18	0	45	0	0	34	0	524	0	0	0	0	0	0
A_ASV00174	Archaea	Nanoarchaeota	Nanoarchaeia	Woesearchaeales	Un_Woesearchaeales	Un_Woesearchaeales	Un_Woesearchaeales		0	0	0	65	100	86	42	58	0	37	71	113	159	130	123	114	86	0	0	0	0	0	0	0	0	0	0	0	48	0	79	31	0	0	0	0	0	0	0	0	0
A_ASV00175	Archaea	Crenarchaeota	Bathyarchaeia	Un_Bathyarchaeia	Un_Bathyarchaeia	Un_Bathyarchaeia	Un_Bathyarchaeia		0	0	0	0	0	0	0	0	0	0	0	0	0	0	0	0	0	0	0	0	0	0	0	0	0	0	1343	0	0	0	0	0	0	0	0	0	0	0	0	0	0
A_ASV00176	Archaea	Crenarchaeota	Bathyarchaeia	Un_Bathyarchaeia	Un_Bathyarchaeia	Un_Bathyarchaeia	Un_Bathyarchaeia		0	0	0	0	0	0	0	0	0	0	0	0	0	0	0	0	0	0	0	0	0	0	0	1340	0	0	0	0	0	0	0	0	0	0	0	0	0	0	0	0	0
A_ASV00177	Archaea	Crenarchaeota	Nitrososphaeria	Nitrosopumilales	Nitrosopumilaceae	Candidatus Nitrosopumilus	Un_Candidatus Nitrosopumilus		0	35	0	0	0	0	0	0	0	127	256	226	179	252	254	0	0	0	0	0	0	0	0	0	0	0	0	0	0	0	0	0	0	0	0	0	0	0	0	0	0
A_ASV00178	Archaea	Asgardarchaeota	Lokiarchaeia	Lokiarchaeia	Lokiarchaeia	Lokiarchaeia	Lokiarchaeia		0	0	0	0	0	0	0	0	0	99	86	97	84	0	0	144	71	84	0	0	0	0	0	0	0	0	0	0	0	0	0	54	0	188	399	0	0	0	0	0	0
A_ASV00180	Archaea	Crenarchaeota	Bathyarchaeia	Un_Bathyarchaeia	Un_Bathyarchaeia	Un_Bathyarchaeia	Un_Bathyarchaeia		0	0	0	0	0	0	0	0	0	0	0	0	0	0	0	0	0	0	0	0	0	0	0	0	0	0	0	104	0	0	106	0	0	0	1087	0	0	0	0	0	0
A_ASV00181	Archaea	Thermoplasmatota	Thermoplasmata	Marine Benthic Group D and DHVEG-1	Un_Marine Benthic Group D and DHVEG-1	Un_Marine Benthic Group D and DHVEG-1	Un_Marine Benthic Group D and DHVEG-1		0	0	0	0	0	0	0	0	0	0	0	0	0	0	0	0	0	0	0	0	0	0	0	0	0	0	0	0	0	0	0	0	0	146	1151	0	0	0	0	0	0
A_ASV00182	Archaea	Crenarchaeota	Bathyarchaeia	Un_Bathyarchaeia	Un_Bathyarchaeia	Un_Bathyarchaeia	Un_Bathyarchaeia		0	0	0	0	0	0	0	0	0	0	0	0	0	0	0	0	0	0	0	0	0	0	1233	0	0	0	0	0	0	0	0	0	0	0	0	59	0	0	0	0	0
A_ASV00184	Archaea	Crenarchaeota	Nitrososphaeria	Nitrosopumilales	Nitrosopumilaceae	Candidatus Nitrosopumilus	Un_Candidatus Nitrosopumilus		63	82	59	84	0	0	0	0	0	59	64	0	52	52	0	0	0	0	0	0	0	719	0	0	0	0	0	0	51	0	0	0	0	0	0	0	0	0	0	0	0
A_ASV00186	Archaea	Crenarchaeota	Bathyarchaeia	Un_Bathyarchaeia	Un_Bathyarchaeia	Un_Bathyarchaeia	Un_Bathyarchaeia		0	55	0	18	0	0	136	97	211	64	47	0	82	58	0	0	0	0	0	0	0	0	0	0	0	0	0	0	0	0	0	0	32	0	0	0	0	0	0	193	0
A_ASV00187	Archaea	Crenarchaeota	Bathyarchaeia	Un_Bathyarchaeia	Un_Bathyarchaeia	Un_Bathyarchaeia	Un_Bathyarchaeia		0	0	0	0	0	0	0	0	0	0	0	0	0	0	0	0	0	0	0	0	0	0	0	739	0	0	0	0	0	71	0	0	0	0	391	60	0	0	0	0	0
A_ASV00188	Archaea	Thermoplasmatota	Thermoplasmata	Marine Benthic Group D and DHVEG-1	Un_Marine Benthic Group D and DHVEG-1	Un_Marine Benthic Group D and DHVEG-1	Un_Marine Benthic Group D and DHVEG-1		0	0	0	0	0	0	0	0	0	0	44	0	59	0	82	111	154	158	0	0	0	0	0	0	0	0	0	48	95	64	231	153	57	0	0	0	0	0	0	0	0
A_ASV00189	Archaea	Crenarchaeota	Bathyarchaeia	Un_Bathyarchaeia	Un_Bathyarchaeia	Un_Bathyarchaeia	Un_Bathyarchaeia		11	0	0	0	15	0	0	0	0	0	0	0	0	0	14	0	11	12	0	0	0	0	0	0	0	0	694	0	0	0	22	0	20	0	249	0	0	0	0	89	32
A_ASV00191	Archaea	Crenarchaeota	Bathyarchaeia	Un_Bathyarchaeia	Un_Bathyarchaeia	Un_Bathyarchaeia	Un_Bathyarchaeia		0	0	0	0	0	0	0	0	0	0	0	0	0	0	0	0	0	0	0	0	1244	0	0	0	0	0	0	0	0	0	0	0	0	0	0	0	0	0	0	0	0
A_ASV00192	Archaea	Crenarchaeota	Bathyarchaeia	Un_Bathyarchaeia	Un_Bathyarchaeia	Un_Bathyarchaeia	Un_Bathyarchaeia		72	0	0	0	0	0	0	70	139	0	0	0	0	0	0	0	0	0	64	0	0	0	0	326	0	0	0	0	0	0	0	0	0	98	363	0	0	0	0	0	0
A_ASV00193	Archaea	Thermoplasmatota	Thermoplasmata	Marine Benthic Group D and DHVEG-1	Un_Marine Benthic Group D and DHVEG-1	Un_Marine Benthic Group D and DHVEG-1	Un_Marine Benthic Group D and DHVEG-1		0	131	0	0	69	0	0	173	23	37	0	0	0	0	70	60	102	66	0	0	0	0	0	0	0	0	0	0	0	0	0	66	0	206	2	0	0	26	0	0	0
A_ASV00195	Archaea	Crenarchaeota	Bathyarchaeia	Un_Bathyarchaeia	Un_Bathyarchaeia	Un_Bathyarchaeia	Un_Bathyarchaeia		0	0	0	0	0	0	0	0	0	0	0	0	0	0	0	0	0	0	0	0	0	0	1131	0	0	0	0	0	0	0	0	0	0	75	0	0	0	0	0	0	0
A_ASV00198	Archaea	Crenarchaeota	Bathyarchaeia	Un_Bathyarchaeia	Un_Bathyarchaeia	Un_Bathyarchaeia	Un_Bathyarchaeia		0	0	0	0	0	0	0	180	0	0	0	0	0	0	0	0	0	0	0	0	0	0	0	0	0	0	0	0	0	0	0	0	0	0	0	0	0	0	0	0	262
A_ASV00199	Archaea	Crenarchaeota	Bathyarchaeia	Un_Bathyarchaeia	Un_Bathyarchaeia	Un_Bathyarchaeia	Un_Bathyarchaeia		0	0	0	0	0	0	0	0	0	0	0	0	0	0	0	0	0	0	0	0	0	0	0	0	0	0	1190	0	0	0	0	0	0	0	0	0	0	0	0	0	0
A_ASV00200	Archaea	Crenarchaeota	Bathyarchaeia	Un_Bathyarchaeia	Un_Bathyarchaeia	Un_Bathyarchaeia	Un_Bathyarchaeia		0	0	0	0	0	0	0	0	0	0	0	0	0	0	0	0	42	0	0	0	0	0	0	0	404	0	0	0	0	0	0	0	0	0	0	0	37	0	0	0	137
A_ASV00202	Archaea	Asgardarchaeota	Lokiarchaeia	Lokiarchaeia	Lokiarchaeia	Lokiarchaeia	Lokiarchaeia		0	0	0	0	0	0	0	0	0	88	0	0	225	0	99	117	101	74	0	0	0	0	0	0	0	0	0	0	115	0	90	133	0	0	0	126	0	0	0	0	0
A_ASV00203	Archaea	Thermoplasmatota	Thermoplasmata	Marine Benthic Group D and DHVEG-1	Un_Marine Benthic Group D and DHVEG-1	Un_Marine Benthic Group D and DHVEG-1	Un_Marine Benthic Group D and DHVEG-1		0	0	0	0	0	0	0	0	0	0	59	0	65	0	92	75	99	0	0	0	0	0	0	0	0	0	0	0	25	0	95	89	92	0	0	474	0	0	0	0	0
A_ASV00205	Archaea	Crenarchaeota	Bathyarchaeia	Un_Bathyarchaeia	Un_Bathyarchaeia	Un_Bathyarchaeia	Un_Bathyarchaeia		0	0	0	0	0	0	0	0	0	0	0	0	0	0	0	0	0	0	0	0	0	0	0	0	0	0	1144	0	0	0	0	0	0	0	0	0	0	0	0	0	0
A_ASV00206	Archaea	Thermoplasmatota	Thermoplasmata	Marine Benthic Group D and DHVEG-1	Un_Marine Benthic Group D and DHVEG-1	Un_Marine Benthic Group D and DHVEG-1	Un_Marine Benthic Group D and DHVEG-1		0	0	0	0	41	0	0	65	71	0	41	0	55	65	32	86	31	0	0	0	0	0	0	0	0	0	0	51	0	35	0	73	54	0	0	386	0	0	0	0	0
A_ASV00207	Archaea	Crenarchaeota	Bathyarchaeia	Un_Bathyarchaeia	Un_Bathyarchaeia	Un_Bathyarchaeia	Un_Bathyarchaeia		0	0	0	0	0	0	0	0	0	0	0	0	0	0	0	0	0	0	0	0	0	0	0	1135	0	0	0	0	0	0	0	0	0	0	0	0	0	0	0	0	0
A_ASV00209	Archaea	Crenarchaeota	Bathyarchaeia	Un_Bathyarchaeia	Un_Bathyarchaeia	Un_Bathyarchaeia	Un_Bathyarchaeia		0	0	0	0	0	0	0	0	0	0	0	0	0	0	0	0	0	0	0	0	0	961	0	0	0	0	0	0	0	0	28	0	60	0	0	0	0	0	0	0	0
A_ASV00210	Archaea	Crenarchaeota	Nitrososphaeria	Nitrosopumilales	Nitrosopumilaceae	Candidatus Nitrosopumilus	Un_Candidatus Nitrosopumilus		0	0	0	0	0	0	0	0	0	0	0	0	0	0	0	0	0	0	0	0	0	0	0	1098	0	0	0	0	0	0	0	0	0	0	0	0	0	0	0	0	0
A_ASV00212	Archaea	Crenarchaeota	Nitrososphaeria	Nitrosopumilales	Nitrosopumilaceae	Un_Nitrosopumilaceae	Un_Nitrosopumilaceae		0	0	0	0	0	0	0	38	0	0	0	0	0	0	0	0	0	0	0	0	0	0	0	0	0	0	0	0	0	0	0	0	0	0	0	0	139	158	197	165	101
A_ASV00213	Archaea	Asgardarchaeota	Lokiarchaeia	Lokiarchaeia	Lokiarchaeia	Lokiarchaeia	Lokiarchaeia		50	0	0	0	0	0	0	0	80	0	0	0	0	0	0	0	0	0	0	0	0	0	0	742	0	0	0	0	0	0	0	0	0	0	0	0	0	0	0	0	0
A_ASV00214	Archaea	Crenarchaeota	Bathyarchaeia	Un_Bathyarchaeia	Un_Bathyarchaeia	Un_Bathyarchaeia	Un_Bathyarchaeia		0	0	0	0	0	0	0	0	0	0	0	0	0	0	0	0	0	0	0	706	0	0	0	0	0	245	0	0	0	0	45	45	0	37	0	0	0	0	0	0	0
A_ASV00216	Archaea	Crenarchaeota	Bathyarchaeia	Un_Bathyarchaeia	Un_Bathyarchaeia	Un_Bathyarchaeia	Un_Bathyarchaeia		0	0	0	0	23	47	24	44	0	11	13	0	0	18	0	32	26	21	0	0	0	0	0	0	0	0	0	26	21	0	36	32	0	0	148	129	9	0	0	77	81
A_ASV00217	Archaea	Crenarchaeota	Bathyarchaeia	Un_Bathyarchaeia	Un_Bathyarchaeia	Un_Bathyarchaeia	Un_Bathyarchaeia		0	0	0	0	0	73	0	0	0	0	0	0	0	0	51	0	36	0	0	0	0	0	0	0	0	0	0	0	42	0	0	0	0	0	0	0	0	0	42	142	147
A_ASV00218	Archaea	Nanoarchaeota	Nanoarchaeia	Woesearchaeales	Un_Woesearchaeales	Un_Woesearchaeales	Un_Woesearchaeales		0	0	0	0	0	0	0	0	0	0	0	0	0	0	0	0	0	0	0	0	0	0	0	0	0	1041	0	0	0	0	0	0	0	0	0	0	0	0	0	0	0
A_ASV00219	Archaea	Crenarchaeota	Bathyarchaeia	Un_Bathyarchaeia	Un_Bathyarchaeia	Un_Bathyarchaeia	Un_Bathyarchaeia		0	0	0	0	0	0	0	0	19	0	0	0	0	0	0	0	0	0	0	0	0	1008	0	0	0	0	0	0	0	0	0	0	0	0	0	0	0	0	0	0	0
A_ASV00222	Archaea	Thermoplasmatota	Thermoplasmata	Marine Benthic Group D and DHVEG-1	Un_Marine Benthic Group D and DHVEG-1	Un_Marine Benthic Group D and DHVEG-1	Un_Marine Benthic Group D and DHVEG-1		0	0	0	29	0	0	0	0	0	74	0	0	107	98	0	0	0	0	30	0	0	0	0	0	0	0	73	0	0	0	0	0	90	0	0	517	0	0	0	0	0
A_ASV00223	Archaea	Asgardarchaeota	Lokiarchaeia	Lokiarchaeia	Lokiarchaeia	Lokiarchaeia	Lokiarchaeia		0	0	0	0	0	0	0	0	0	0	0	0	0	0	0	0	0	0	0	0	0	0	1017	0	0	0	0	0	0	0	0	0	0	0	0	0	0	0	0	0	0
A_ASV00228	Archaea	Nanoarchaeota	Nanoarchaeia	Woesearchaeales	Un_Woesearchaeales	Un_Woesearchaeales	Un_Woesearchaeales		0	0	0	0	0	0	0	0	0	0	0	0	0	0	0	0	0	0	0	985	0	0	0	0	0	0	0	0	0	0	0	0	0	0	0	0	0	0	0	0	0
A_ASV00230	Archaea	Crenarchaeota	Bathyarchaeia	Un_Bathyarchaeia	Un_Bathyarchaeia	Un_Bathyarchaeia	Un_Bathyarchaeia		0	0	0	0	0	0	0	0	0	0	0	0	0	0	0	0	0	0	0	0	0	0	0	975	0	0	0	0	0	0	0	0	0	0	0	0	0	0	0	0	0
A_ASV00231	Archaea	Thermoplasmatota	Thermoplasmata	Marine Benthic Group D and DHVEG-1	Un_Marine Benthic Group D and DHVEG-1	Un_Marine Benthic Group D and DHVEG-1	Un_Marine Benthic Group D and DHVEG-1		0	0	0	0	32	0	0	0	0	23	65	67	34	74	65	59	60	64	0	0	0	0	0	0	0	19	0	32	0	30	50	64	78	157	0	0	0	0	0	0	0
A_ASV00233	Archaea	Crenarchaeota	Nitrososphaeria	Nitrosopumilales	Nitrosopumilaceae	Candidatus Nitrosopumilus	Un_Candidatus Nitrosopumilus		0	0	0	0	0	0	0	0	0	0	0	0	0	0	0	0	0	0	0	0	691	0	0	0	0	270	0	0	0	0	0	0	0	0	0	0	0	0	0	0	0
A_ASV00232	Archaea	Thermoplasmatota	Thermoplasmata	Marine Benthic Group D and DHVEG-1	Un_Marine Benthic Group D and DHVEG-1	Un_Marine Benthic Group D and DHVEG-1	Un_Marine Benthic Group D and DHVEG-1		0	0	0	0	0	0	0	58	0	0	0	0	91	0	57	125	119	90	0	0	0	0	0	0	0	0	0	0	0	0	37	57	80	137	0	110	0	0	0	0	0
A_ASV00234	Archaea	Thermoplasmatota	Thermoplasmata	Un_Thermoplasmata	Un_Thermoplasmata	Un_Thermoplasmata	Un_Thermoplasmata		0	0	0	0	0	0	0	0	0	0	0	0	0	0	0	0	0	0	0	0	0	950	0	0	0	0	0	0	0	0	0	0	0	0	0	0	0	0	0	0	0
A_ASV00235	Archaea	Crenarchaeota	Bathyarchaeia	Un_Bathyarchaeia	Un_Bathyarchaeia	Un_Bathyarchaeia	Un_Bathyarchaeia		0	0	0	0	0	0	0	0	0	0	0	0	0	0	0	0	0	0	0	0	0	0	0	0	0	949	0	0	0	0	0	0	0	0	0	0	0	0	0	0	0
A_ASV00238	Archaea	Asgardarchaeota	Lokiarchaeia	Lokiarchaeia	Lokiarchaeia	Lokiarchaeia	Lokiarchaeia		0	0	0	0	0	0	0	0	0	0	0	0	0	0	0	0	0	0	0	0	0	0	0	0	0	0	945	0	0	0	0	0	0	0	0	0	0	0	0	0	0
A_ASV00241	Archaea	Thermoplasmatota	Thermoplasmata	Marine Benthic Group D and DHVEG-1	Un_Marine Benthic Group D and DHVEG-1	Un_Marine Benthic Group D and DHVEG-1	Un_Marine Benthic Group D and DHVEG-1		0	0	0	0	0	0	0	45	0	0	0	0	61	25	52	82	84	45	0	0	0	0	0	0	0	0	0	27	0	0	73	100	109	63	0	172	0	0	0	0	0
A_ASV00243	Archaea	Crenarchaeota	Bathyarchaeia	Un_Bathyarchaeia	Un_Bathyarchaeia	Un_Bathyarchaeia	Un_Bathyarchaeia		0	0	0	0	0	0	0	0	0	0	0	0	0	0	0	0	0	0	0	0	0	0	0	0	936	0	0	0	0	0	0	0	0	0	0	0	0	0	0	0	0
A_ASV00244	Archaea	Euryarchaeota	Thermococci	Methanofastidiosales	Un_Methanofastidiosales	Un_Methanofastidiosales	Un_Methanofastidiosales		0	0	0	0	33	0	0	0	0	0	0	0	0	0	0	0	0	0	0	0	0	846	0	0	0	0	0	0	0	0	0	0	0	0	0	0	0	0	0	0	29
A_ASV00245	Archaea	Crenarchaeota	Bathyarchaeia	Un_Bathyarchaeia	Un_Bathyarchaeia	Un_Bathyarchaeia	Un_Bathyarchaeia		0	18	0	0	0	29	56	109	58	0	40	0	0	0	0	0	24	0	0	0	0	0	0	0	0	0	0	0	23	0	0	30	0	0	200	151	0	0	0	0	0
A_ASV00248	Archaea	Thermoplasmatota	Thermoplasmata	Marine Benthic Group D and DHVEG-1	Un_Marine Benthic Group D and DHVEG-1	Un_Marine Benthic Group D and DHVEG-1	Un_Marine Benthic Group D and DHVEG-1		0	48	0	0	0	0	58	16	57	62	41	20	0	0	57	78	0	31	0	0	0	0	0	0	0	0	0	0	20	0	29	26	23	103	0	0	0	0	0	0	53
A_ASV00249	Archaea	Crenarchaeota	Bathyarchaeia	Un_Bathyarchaeia	Un_Bathyarchaeia	Un_Bathyarchaeia	Un_Bathyarchaeia		0	0	0	0	0	0	0	0	0	0	0	0	0	0	0	0	0	0	0	24	0	295	0	0	0	0	607	0	0	0	0	0	0	0	0	0	0	0	0	0	0
A_ASV00252	Archaea	Crenarchaeota	Nitrososphaeria	Nitrosopumilales	Nitrosopumilaceae	Candidatus Nitrosopumilus	Un_Candidatus Nitrosopumilus		0	67	0	0	32	0	0	0	0	82	132	106	84	0	116	41	76	49	0	0	0	0	0	0	0	0	0	0	0	0	0	0	0	0	0	0	36	40	59	0	0
A_ASV00253	Archaea	Crenarchaeota	Nitrososphaeria	Nitrosopumilales	Nitrosopumilaceae	Cenarchaeum	Un_Cenarchaeum		65	73	0	0	23	30	0	0	0	0	0	0	0	0	0	0	0	0	0	0	0	0	0	0	0	0	0	0	0	0	0	0	0	0	0	0	130	153	169	0	114
A_ASV00254	Archaea	Thermoplasmatota	Thermoplasmata	Marine Benthic Group D and DHVEG-1	Un_Marine Benthic Group D and DHVEG-1	Un_Marine Benthic Group D and DHVEG-1	Un_Marine Benthic Group D and DHVEG-1		0	0	0	0	0	0	0	0	91	56	0	0	0	0	76	53	88	0	0	0	0	0	0	0	0	0	0	0	0	0	0	0	0	0	553	0	0	0	0	0	0
A_ASV00255	Archaea	Crenarchaeota	Bathyarchaeia	Un_Bathyarchaeia	Un_Bathyarchaeia	Un_Bathyarchaeia	Un_Bathyarchaeia		47	0	0	0	0	0	0	0	0	0	0	0	0	0	0	0	0	0	0	0	0	0	869	0	0	0	0	0	0	0	0	0	0	0	0	0	0	0	0	0	0
A_ASV00256	Archaea	Crenarchaeota	Bathyarchaeia	Un_Bathyarchaeia	Un_Bathyarchaeia	Un_Bathyarchaeia	Un_Bathyarchaeia		0	0	0	0	0	0	0	0	0	0	0	0	0	0	0	0	0	0	0	0	0	0	0	0	0	0	914	0	0	0	0	0	0	0	0	0	0	0	0	0	0
A_ASV00257	Archaea	Crenarchaeota	Bathyarchaeia	Un_Bathyarchaeia	Un_Bathyarchaeia	Un_Bathyarchaeia	Un_Bathyarchaeia		0	0	0	0	0	0	0	0	0	0	0	0	0	0	0	0	0	0	0	0	0	908	0	0	0	0	0	0	0	0	0	0	0	0	0	0	0	0	0	0	0
A_ASV00258	Archaea	Crenarchaeota	Bathyarchaeia	Un_Bathyarchaeia	Un_Bathyarchaeia	Un_Bathyarchaeia	Un_Bathyarchaeia		0	0	0	0	0	0	0	0	0	0	0	0	0	0	0	0	0	0	0	0	0	0	0	0	0	0	906	0	0	0	0	0	0	0	0	0	0	0	0	0	0
A_ASV00259	Archaea	Hydrothermarchaeota	Hydrothermarchaeia	Hydrothermarchaeales	Un_Hydrothermarchaeales	Un_Hydrothermarchaeales	Un_Hydrothermarchaeales		0	0	16	7	0	0	0	0	0	0	0	0	0	0	0	0	0	0	0	0	0	0	0	0	0	0	0	0	0	0	0	0	0	0	0	0	67	146	149	0	126
A_ASV00260	Archaea	Thermoplasmatota	Thermoplasmata	Marine Benthic Group D and DHVEG-1	Un_Marine Benthic Group D and DHVEG-1	Un_Marine Benthic Group D and DHVEG-1	Un_Marine Benthic Group D and DHVEG-1		0	0	0	0	0	0	0	0	0	0	0	0	0	0	0	0	0	0	0	0	0	0	0	900	0	0	0	0	0	0	0	0	0	0	0	0	0	0	0	0	0
A_ASV00261	Archaea	Crenarchaeota	Bathyarchaeia	Un_Bathyarchaeia	Un_Bathyarchaeia	Un_Bathyarchaeia	Un_Bathyarchaeia		0	0	0	44	70	55	63	26	58	0	0	0	0	0	28	0	0	0	0	0	0	0	0	0	0	0	0	39	36	0	0	36	0	124	0	148	0	0	0	111	0
A_ASV00262	Archaea	Crenarchaeota	Bathyarchaeia	Un_Bathyarchaeia	Un_Bathyarchaeia	Un_Bathyarchaeia	Un_Bathyarchaeia		90	0	0	0	0	74	0	0	0	0	0	0	0	0	0	0	27	0	76	0	0	0	0	0	0	0	0	0	82	0	73	0	0	0	311	117	0	0	0	0	0
A_ASV00263	Archaea	Crenarchaeota	Bathyarchaeia	Un_Bathyarchaeia	Un_Bathyarchaeia	Un_Bathyarchaeia	Un_Bathyarchaeia		0	0	0	0	0	0	0	0	0	0	0	0	0	0	0	0	0	0	0	0	0	0	0	0	0	297	0	0	0	0	0	0	51	86	276	178	0	0	0	0	0
A_ASV00264	Archaea	Asgardarchaeota	Lokiarchaeia	Lokiarchaeia	Lokiarchaeia	Lokiarchaeia	Lokiarchaeia		0	0	0	0	0	0	0	0	0	0	0	0	0	0	0	0	0	0	0	0	0	0	0	0	0	0	884	0	0	0	0	0	0	0	0	0	0	0	0	0	0
A_ASV00265	Archaea	Crenarchaeota	Nitrososphaeria	Nitrosopumilales	Nitrosopumilaceae	Candidatus Nitrosopumilus	Un_Candidatus Nitrosopumilus		0	0	0	0	0	0	0	0	0	0	140	0	107	0	0	0	0	0	57	322	0	0	0	0	0	0	0	0	0	0	0	0	0	0	0	0	0	0	0	0	0
A_ASV00266	Archaea	Crenarchaeota	Bathyarchaeia	Un_Bathyarchaeia	Un_Bathyarchaeia	Un_Bathyarchaeia	Un_Bathyarchaeia		0	0	0	0	0	0	0	0	0	0	0	0	0	0	0	0	0	0	0	0	0	0	0	872	0	0	0	0	0	0	0	0	0	0	0	0	0	0	0	0	0
A_ASV00269	Archaea	Thermoplasmatota	Thermoplasmata	JdFR-43	Un_JdFR-43	Un_JdFR-43	Un_JdFR-43		0	0	0	0	0	0	0	0	0	0	0	0	14	0	27	19	20	0	0	0	0	711	0	0	0	0	0	0	0	0	20	25	27	0	0	0	0	0	0	0	0
A_ASV00270	Archaea	Hydrothermarchaeota	Hydrothermarchaeia	Hydrothermarchaeales	Un_Hydrothermarchaeales	Un_Hydrothermarchaeales	Un_Hydrothermarchaeales		0	24	0	0	0	0	0	44	0	0	0	0	0	0	0	0	0	0	0	0	0	0	0	0	0	0	0	0	0	0	0	0	0	0	0	0	84	89	125	56	63
A_ASV00272	Archaea	Crenarchaeota	Nitrososphaeria	Nitrosopumilales	Nitrosopumilaceae	Candidatus Nitrosopumilus	Un_Candidatus Nitrosopumilus		0	0	0	0	0	0	0	0	0	0	0	0	0	0	0	0	0	0	0	0	0	0	0	0	0	0	0	0	0	0	0	0	0	0	0	0	201	194	308	49	55
A_ASV00273	Archaea	Crenarchaeota	Bathyarchaeia	Un_Bathyarchaeia	Un_Bathyarchaeia	Un_Bathyarchaeia	Un_Bathyarchaeia		51	0	0	0	0	0	0	0	0	0	0	0	0	0	0	0	0	0	0	727	0	0	0	0	0	0	0	0	0	0	0	0	0	0	0	79	0	0	0	0	0
A_ASV00274	Archaea	Un_Archaea	Un_Archaea	Un_Archaea	Un_Archaea	Un_Archaea	Un_Archaea		0	0	0	0	0	0	0	0	0	0	0	130	117	123	176	0	0	0	0	0	0	0	0	0	0	0	0	0	0	0	0	163	0	0	0	0	0	0	0	0	0
A_ASV00275	Archaea	Thermoplasmatota	Thermoplasmata	Marine Benthic Group D and DHVEG-1	Un_Marine Benthic Group D and DHVEG-1	Un_Marine Benthic Group D and DHVEG-1	Un_Marine Benthic Group D and DHVEG-1		0	30	0	0	0	0	43	29	107	0	0	16	126	33	16	17	0	0	0	0	0	0	0	0	0	0	0	0	0	0	0	0	36	0	0	378	0	0	0	0	0
A_ASV00276	Archaea	Crenarchaeota	Bathyarchaeia	Un_Bathyarchaeia	Un_Bathyarchaeia	Un_Bathyarchaeia	Un_Bathyarchaeia		15	0	0	0	0	60	0	71	166	0	0	0	0	0	0	0	0	0	0	0	0	0	0	0	0	0	0	0	0	0	37	0	0	27	0	0	0	0	0	61	55
A_ASV00278	Archaea	Crenarchaeota	Bathyarchaeia	Un_Bathyarchaeia	Un_Bathyarchaeia	Un_Bathyarchaeia	Un_Bathyarchaeia		0	0	0	0	0	0	0	0	0	0	0	0	0	0	0	0	0	0	0	0	0	0	0	0	0	844	0	0	0	0	0	0	0	0	0	0	0	0	0	0	0
A_ASV00279	Archaea	Crenarchaeota	Bathyarchaeia	Un_Bathyarchaeia	Un_Bathyarchaeia	Un_Bathyarchaeia	Un_Bathyarchaeia		0	0	0	0	0	0	0	106	44	0	0	25	0	0	0	0	0	0	0	0	0	0	0	0	0	0	0	0	0	50	52	0	63	62	0	439	0	0	0	0	0
A_ASV00280	Archaea	Thermoplasmatota	Un_Thermoplasmatota	Un_Thermoplasmatota	Un_Thermoplasmatota	Un_Thermoplasmatota	Un_Thermoplasmatota		0	0	27	67	92	0	0	0	0	0	45	0	69	87	137	0	75	81	0	0	0	0	0	0	0	0	0	0	0	0	53	0	29	0	0	0	0	0	0	0	75
A_ASV00281	Archaea	Crenarchaeota	Bathyarchaeia	Un_Bathyarchaeia	Un_Bathyarchaeia	Un_Bathyarchaeia	Un_Bathyarchaeia		0	0	0	0	0	0	0	63	86	0	12	0	15	0	0	0	0	0	0	0	0	0	0	0	128	0	238	0	0	0	0	27	0	76	0	98	0	0	0	0	0
A_ASV00283	Archaea	Crenarchaeota	Bathyarchaeia	Un_Bathyarchaeia	Un_Bathyarchaeia	Un_Bathyarchaeia	Un_Bathyarchaeia		0	0	0	0	0	0	0	0	0	0	0	0	0	0	0	0	0	0	0	0	0	0	0	0	0	0	0	0	0	0	0	0	0	0	0	0	88	46	29	66	96
A_ASV00284	Archaea	Crenarchaeota	Bathyarchaeia	Un_Bathyarchaeia	Un_Bathyarchaeia	Un_Bathyarchaeia	Un_Bathyarchaeia		0	0	0	0	0	0	0	0	0	0	0	0	0	0	0	0	0	0	0	0	0	0	0	823	0	0	0	0	0	0	0	0	0	0	0	0	0	0	0	0	0
A_ASV00285	Archaea	Thermoplasmatota	Thermoplasmata	Marine Benthic Group D and DHVEG-1	Un_Marine Benthic Group D and DHVEG-1	Un_Marine Benthic Group D and DHVEG-1	Un_Marine Benthic Group D and DHVEG-1		26	0	0	0	0	0	0	0	0	0	0	0	0	0	0	0	0	0	0	0	0	0	0	0	0	0	796	0	0	0	0	0	0	0	0	0	0	0	0	0	0
A_ASV00286	Archaea	Crenarchaeota	Nitrososphaeria	Nitrosopumilales	Nitrosopumilaceae	Un_Nitrosopumilaceae	Un_Nitrosopumilaceae		0	0	0	0	0	0	0	0	0	0	0	0	0	0	0	0	0	0	0	0	0	0	0	0	0	817	0	0	0	0	0	0	0	0	0	0	0	0	0	0	0
A_ASV00287	Archaea	Thermoplasmatota	Thermoplasmata	Marine Benthic Group D and DHVEG-1	Un_Marine Benthic Group D and DHVEG-1	Un_Marine Benthic Group D and DHVEG-1	Un_Marine Benthic Group D and DHVEG-1		0	0	0	0	0	0	0	0	0	0	92	0	0	67	73	126	180	131	0	0	0	0	0	0	0	0	0	0	0	0	0	0	89	55	0	0	0	0	0	0	0
A_ASV00289	Archaea	Asgardarchaeota	Odinarchaeia	Un_Odinarchaeia	Un_Odinarchaeia	Un_Odinarchaeia	Un_Odinarchaeia		0	0	0	0	0	0	0	0	0	0	0	0	0	0	0	0	0	0	0	0	0	0	0	0	808	0	0	0	0	0	0	0	0	0	0	0	0	0	0	0	0
A_ASV00290	Archaea	Asgardarchaeota	Lokiarchaeia	Lokiarchaeia	Lokiarchaeia	Lokiarchaeia	Lokiarchaeia		0	0	42	0	0	51	0	75	0	52	0	0	58	0	73	0	0	78	0	0	0	0	0	0	0	0	0	37	63	43	66	51	73	0	0	0	0	0	0	0	0
A_ASV00291	Archaea	Nanoarchaeota	Nanoarchaeia	Woesearchaeales	Un_Woesearchaeales	Un_Woesearchaeales	Un_Woesearchaeales		0	0	0	0	0	0	0	0	0	28	0	89	102	102	106	70	50	66	86	0	0	0	0	0	0	0	0	15	33	0	46	0	0	0	0	0	0	0	0	0	0
A_ASV00292	Archaea	Crenarchaeota	Bathyarchaeia	Un_Bathyarchaeia	Un_Bathyarchaeia	Un_Bathyarchaeia	Un_Bathyarchaeia		57	0	0	0	0	0	149	120	174	0	0	0	0	0	0	0	0	0	0	0	0	0	0	0	0	0	0	0	0	0	0	0	0	0	0	0	0	0	0	0	0
A_ASV00293	Archaea	Crenarchaeota	Bathyarchaeia	Un_Bathyarchaeia	Un_Bathyarchaeia	Un_Bathyarchaeia	Un_Bathyarchaeia		0	0	0	0	0	0	0	0	0	0	0	0	0	0	0	0	0	0	0	0	0	0	663	0	0	0	0	0	0	0	0	0	0	0	0	121	0	0	0	0	0
A_ASV00294	Archaea	Halobacterota	Methanosarcinia	Methanosarciniales	Syntrophoarchaeaceae	Candidatus Syntrophoarchaeum	Candidatus Syntrophoarchaeum		0	0	0	0	0	0	0	25	0	0	0	0	0	0	0	0	0	0	0	0	0	0	0	0	758	0	0	0	0	0	0	0	0	0	0	0	0	0	0	0	0
A_ASV00295	Archaea	Crenarchaeota	Bathyarchaeia	Un_Bathyarchaeia	Un_Bathyarchaeia	Un_Bathyarchaeia	Un_Bathyarchaeia		0	0	0	0	0	0	0	0	0	0	0	0	0	0	0	0	0	0	0	0	0	0	0	0	0	0	777	0	0	0	0	0	0	0	0	0	0	0	0	0	0
A_ASV00297	Archaea	Hydrothermarchaeota	Hydrothermarchaeia	Hydrothermarchaeales	Un_Hydrothermarchaeales	Un_Hydrothermarchaeales	Un_Hydrothermarchaeales		0	0	0	0	0	0	0	0	0	0	0	0	0	0	0	0	0	0	0	0	0	0	0	0	0	0	0	0	0	0	0	0	0	0	0	0	76	63	119	0	116
A_ASV00296	Archaea	Un_Archaea	Un_Archaea	Un_Archaea	Un_Archaea	Un_Archaea	Un_Archaea		0	0	0	0	0	0	0	0	0	0	0	0	0	0	0	0	0	0	0	0	0	776	0	0	0	0	0	0	0	0	0	0	0	0	0	0	0	0	0	0	0
A_ASV00298	Archaea	Crenarchaeota	Bathyarchaeia	Un_Bathyarchaeia	Un_Bathyarchaeia	Un_Bathyarchaeia	Un_Bathyarchaeia		0	0	0	0	0	0	0	0	0	0	0	0	0	0	0	0	0	0	0	0	0	0	0	0	0	0	773	0	0	0	0	0	0	0	0	0	0	0	0	0	0
A_ASV00300	Archaea	Crenarchaeota	Bathyarchaeia	Un_Bathyarchaeia	Un_Bathyarchaeia	Un_Bathyarchaeia	Un_Bathyarchaeia		0	0	0	0	0	0	0	0	0	0	0	0	0	0	0	0	0	0	0	0	0	770	0	0	0	0	0	0	0	0	0	0	0	0	0	0	0	0	0	0	0
A_ASV00302	Archaea	Hydrothermarchaeota	Hydrothermarchaeia	Hydrothermarchaeales	Un_Hydrothermarchaeales	Un_Hydrothermarchaeales	Un_Hydrothermarchaeales		0	0	299	83	0	33	0	0	0	0	0	3	0	0	0	0	0	0	0	0	0	0	0	0	0	0	0	0	0	0	0	0	0	0	0	0	0	127	146	0	0
A_ASV00303	Archaea	Crenarchaeota	Bathyarchaeia	Un_Bathyarchaeia	Un_Bathyarchaeia	Un_Bathyarchaeia	Un_Bathyarchaeia		0	0	0	0	0	0	0	0	0	0	0	0	0	0	0	0	0	24	0	0	0	0	0	0	0	0	0	84	80	62	151	125	127	110	0	0	0	0	0	0	0
A_ASV00305	Archaea	Crenarchaeota	Bathyarchaeia	Un_Bathyarchaeia	Un_Bathyarchaeia	Un_Bathyarchaeia	Un_Bathyarchaeia		0	0	0	0	58	0	86	0	0	0	0	0	99	0	0	0	0	0	0	0	0	0	0	0	0	0	0	61	0	85	0	0	0	0	156	214	0	0	0	0	0
A_ASV00304	Archaea	Nanoarchaeota	Nanoarchaeia	Woesearchaeales	Un_Woesearchaeales	Un_Woesearchaeales	Un_Woesearchaeales		25	0	68	0	68	102	75	0	0	80	0	87	0	94	0	0	60	54	0	0	0	0	0	0	0	0	0	0	0	0	0	0	0	0	0	0	46	0	0	0	0
A_ASV00306	Archaea	Crenarchaeota	Nitrososphaeria	Nitrosopumilales	Nitrosopumilaceae	Un_Nitrosopumilaceae	Un_Nitrosopumilaceae		0	0	0	0	0	0	0	0	0	0	0	0	0	0	0	0	0	0	0	0	0	0	685	0	0	0	0	0	0	0	0	0	0	71	0	0	0	0	0	0	0
A_ASV00307	Archaea	Crenarchaeota	Bathyarchaeia	Un_Bathyarchaeia	Un_Bathyarchaeia	Un_Bathyarchaeia	Un_Bathyarchaeia		0	45	23	50	98	58	46	0	30	0	18	0	0	39	29	0	20	0	0	0	0	0	0	0	0	0	0	0	0	0	0	0	0	0	0	76	0	0	0	0	0
A_ASV00308	Archaea	Crenarchaeota	Bathyarchaeia	Un_Bathyarchaeia	Un_Bathyarchaeia	Un_Bathyarchaeia	Un_Bathyarchaeia		0	0	0	0	0	0	0	86	0	0	0	0	0	0	0	0	0	0	0	0	0	0	0	0	0	0	255	0	0	0	42	77	0	0	0	0	0	0	0	0	67
A_ASV00309	Archaea	Halobacterota	Methanosarcinia	Methanosarciniales	Methanosarcinaceae	Methanosarcina	Un_Methanosarcina		0	0	0	0	0	0	0	0	0	0	0	0	0	0	0	0	0	0	0	0	0	0	0	0	0	0	751	0	0	0	0	0	0	0	0	0	0	0	0	0	0
A_ASV00310	Archaea	Crenarchaeota	Bathyarchaeia	Un_Bathyarchaeia	Un_Bathyarchaeia	Un_Bathyarchaeia	Un_Bathyarchaeia		0	0	0	0	0	0	0	0	0	0	0	0	0	0	0	0	0	0	0	0	0	0	0	749	0	0	0	0	0	0	0	0	0	0	0	0	0	0	0	0	0
A_ASV00312	Archaea	Crenarchaeota	Bathyarchaeia	Un_Bathyarchaeia	Un_Bathyarchaeia	Un_Bathyarchaeia	Un_Bathyarchaeia		0	0	0	0	0	0	0	0	0	0	0	0	0	0	0	0	0	0	0	0	0	0	747	0	0	0	0	0	0	0	0	0	0	0	0	0	0	0	0	0	0
A_ASV00314	Archaea	Crenarchaeota	Nitrososphaeria	Nitrosopumilales	Nitrosopumilaceae	Candidatus Nitrosopumilus	Un_Candidatus Nitrosopumilus		0	73	88	0	0	0	0	0	114	0	0	0	0	0	0	0	0	0	0	0	0	0	0	0	0	0	0	0	0	0	0	0	0	0	0	0	106	157	204	0	0
A_ASV00315	Archaea	Crenarchaeota	Bathyarchaeia	Un_Bathyarchaeia	Un_Bathyarchaeia	Un_Bathyarchaeia	Un_Bathyarchaeia		39	0	0	0	0	22	38	0	0	0	0	0	0	0	0	48	48	0	0	0	0	0	0	0	0	0	0	0	62	0	0	0	0	184	248	0	0	0	0	45	0
A_ASV00316	Archaea	Crenarchaeota	Bathyarchaeia	Un_Bathyarchaeia	Un_Bathyarchaeia	Un_Bathyarchaeia	Un_Bathyarchaeia		0	0	0	52	82	0	200	257	68	0	0	0	0	0	0	0	0	0	0	0	0	0	0	0	0	0	0	0	0	0	0	0	0	0	0	74	0	0	0	0	0
A_ASV00318	Archaea	Asgardarchaeota	Lokiarchaeia	Lokiarchaeia	Lokiarchaeia	Lokiarchaeia	Lokiarchaeia		0	0	0	0	0	0	0	0	0	0	0	0	0	0	0	119	128	0	0	0	0	0	0	0	0	0	0	0	0	0	0	0	0	0	179	0	101	0	0	0	0
A_ASV00319	Archaea	Thermoplasmatota	Thermoplasmata	Un_Thermoplasmata	Un_Thermoplasmata	Un_Thermoplasmata	Un_Thermoplasmata		0	0	0	0	0	0	0	67	0	0	0	0	79	0	0	0	63	0	0	0	0	0	0	0	0	0	0	0	0	0	0	0	0	0	312	0	0	0	0	160	0
A_ASV00321	Archaea	Crenarchaeota	Bathyarchaeia	Un_Bathyarchaeia	Un_Bathyarchaeia	Un_Bathyarchaeia	Un_Bathyarchaeia		0	0	0	0	0	0	51	0	0	0	0	0	0	0	0	0	0	0	0	0	0	0	0	0	0	0	302	0	0	0	0	0	0	103	0	101	0	0	43	0	56
A_ASV00322	Archaea	Crenarchaeota	Bathyarchaeia	Un_Bathyarchaeia	Un_Bathyarchaeia	Un_Bathyarchaeia	Un_Bathyarchaeia		0	0	0	0	0	0	0	0	0	0	0	0	0	0	0	0	0	0	0	0	0	0	0	0	0	0	712	0	0	0	0	0	0	0	0	0	0	0	0	0	0
A_ASV00323	Archaea	Crenarchaeota	Bathyarchaeia	Un_Bathyarchaeia	Un_Bathyarchaeia	Un_Bathyarchaeia	Un_Bathyarchaeia		0	0	0	0	0	0	0	0	0	0	0	0	0	0	0	0	0	0	0	0	0	0	0	711	0	0	0	0	0	0	0	0	0	0	0	0	0	0	0	0	0
A_ASV00325	Archaea	Crenarchaeota	Bathyarchaeia	Un_Bathyarchaeia	Un_Bathyarchaeia	Un_Bathyarchaeia	Un_Bathyarchaeia		0	0	0	0	0	0	0	0	0	0	0	0	0	0	0	0	0	0	0	0	0	0	0	0	0	0	708	0	0	0	0	0	0	0	0	0	0	0	0	0	0
A_ASV00328	Archaea	Crenarchaeota	Bathyarchaeia	Un_Bathyarchaeia	Un_Bathyarchaeia	Un_Bathyarchaeia	Un_Bathyarchaeia		0	0	0	0	0	0	0	0	0	0	0	0	0	0	0	0	0	0	0	0	0	88	0	564	0	0	50	0	0	0	0	0	0	0	0	0	0	0	0	0	0
A_ASV00329	Archaea	Crenarchaeota	Bathyarchaeia	Un_Bathyarchaeia	Un_Bathyarchaeia	Un_Bathyarchaeia	Un_Bathyarchaeia		0	0	0	0	0	0	0	0	0	0	0	0	0	0	0	0	0	0	0	0	0	0	0	0	0	0	700	0	0	0	0	0	0	0	0	0	0	0	0	0	0
A_ASV00330	Archaea	Crenarchaeota	Bathyarchaeia	Un_Bathyarchaeia	Un_Bathyarchaeia	Un_Bathyarchaeia	Un_Bathyarchaeia		0	0	0	0	0	0	0	0	0	0	0	0	0	0	0	0	0	0	0	0	0	697	0	0	0	0	0	0	0	0	0	0	0	0	0	0	0	0	0	0	0
A_ASV00331	Archaea	Crenarchaeota	Bathyarchaeia	Un_Bathyarchaeia	Un_Bathyarchaeia	Un_Bathyarchaeia	Un_Bathyarchaeia		0	0	0	0	0	0	0	0	0	0	0	0	18	35	21	0	0	0	57	0	0	0	0	0	0	0	0	67	40	83	86	67	59	162	0	0	0	0	0	0	0
A_ASV00332	Archaea	Thermoplasmatota	Thermoplasmata	Marine Benthic Group D and DHVEG-1	Un_Marine Benthic Group D and DHVEG-1	Un_Marine Benthic Group D and DHVEG-1	Un_Marine Benthic Group D and DHVEG-1		0	0	0	0	0	0	0	0	0	0	0	0	0	0	0	0	0	0	0	688	0	0	0	0	0	0	0	0	0	0	0	0	0	0	0	0	0	0	0	0	0
A_ASV00334	Archaea	Crenarchaeota	Bathyarchaeia	Un_Bathyarchaeia	Un_Bathyarchaeia	Un_Bathyarchaeia	Un_Bathyarchaeia		0	0	0	0	0	0	0	0	0	0	0	0	0	0	0	0	0	0	0	0	0	0	0	0	0	0	0	0	0	0	155	0	0	0	532	0	0	0	0	0	0
A_ASV00333	Archaea	Thermoplasmatota	Thermoplasmata	Marine Benthic Group D and DHVEG-1	Un_Marine Benthic Group D and DHVEG-1	Un_Marine Benthic Group D and DHVEG-1	Un_Marine Benthic Group D and DHVEG-1		0	0	0	0	0	0	185	233	0	0	0	0	0	0	0	0	0	0	0	0	0	0	0	0	0	0	0	0	0	0	0	0	0	0	0	0	0	0	0	0	23
A_ASV00336	Archaea	Crenarchaeota	Bathyarchaeia	Un_Bathyarchaeia	Un_Bathyarchaeia	Un_Bathyarchaeia	Un_Bathyarchaeia		0	0	0	0	0	0	30	0	0	0	0	0	0	0	0	0	0	0	0	644	0	0	0	0	0	0	0	0	0	0	0	0	0	0	0	0	0	0	0	0	0
A_ASV00339	Archaea	Crenarchaeota	Bathyarchaeia	Un_Bathyarchaeia	Un_Bathyarchaeia	Un_Bathyarchaeia	Un_Bathyarchaeia		34	0	0	0	0	0	0	0	0	29	0	0	0	52	14	0	0	0	0	0	0	0	0	0	0	0	0	0	0	45	30	39	44	36	199	141	0	0	0	0	0
A_ASV00340	Archaea	Crenarchaeota	Bathyarchaeia	Un_Bathyarchaeia	Un_Bathyarchaeia	Un_Bathyarchaeia	Un_Bathyarchaeia		0	0	0	0	0	0	0	0	0	0	0	0	0	0	0	0	0	0	0	0	0	0	0	0	0	243	0	97	0	88	52	78	0	57	47	0	0	0	0	0	0
A_ASV00341	Archaea	Crenarchaeota	Bathyarchaeia	Un_Bathyarchaeia	Un_Bathyarchaeia	Un_Bathyarchaeia	Un_Bathyarchaeia		0	0	0	0	0	0	0	0	0	0	0	0	13	0	0	0	0	0	0	0	0	0	0	0	0	648	0	0	0	0	0	0	0	0	0	0	0	0	0	0	0
A_ASV00343	Archaea	Crenarchaeota	Bathyarchaeia	Un_Bathyarchaeia	Un_Bathyarchaeia	Un_Bathyarchaeia	Un_Bathyarchaeia		0	0	0	0	0	0	0	0	0	0	0	0	0	0	0	0	0	0	0	0	0	0	0	0	0	660	0	0	0	0	0	0	0	0	0	0	0	0	0	0	0
A_ASV00345	Archaea	Thermoplasmatota	Thermoplasmata	Marine Benthic Group D and DHVEG-1	Un_Marine Benthic Group D and DHVEG-1	Un_Marine Benthic Group D and DHVEG-1	Un_Marine Benthic Group D and DHVEG-1		0	0	0	0	0	38	72	125	136	0	0	0	41	0	0	36	0	0	0	0	0	0	0	0	0	0	0	0	0	0	0	0	0	0	0	0	0	0	0	0	0
A_ASV00346	Archaea	Asgardarchaeota	Lokiarchaeia	Lokiarchaeia	Lokiarchaeia	Lokiarchaeia	Lokiarchaeia		0	0	0	0	94	0	64	0	35	0	39	0	0	31	0	62	63	0	130	0	0	0	0	0	0	0	0	0	0	0	0	0	0	0	0	0	14	26	0	0	53
A_ASV00347	Archaea	Crenarchaeota	Bathyarchaeia	Un_Bathyarchaeia	Un_Bathyarchaeia	Un_Bathyarchaeia	Un_Bathyarchaeia		0	0	0	0	0	0	0	0	0	0	0	0	0	0	0	0	0	0	0	0	0	0	0	0	0	0	646	0	0	0	0	0	0	0	0	0	0	0	0	0	0
A_ASV00348	Archaea	Thermoplasmatota	Thermoplasmata	Marine Benthic Group D and DHVEG-1	Un_Marine Benthic Group D and DHVEG-1	Un_Marine Benthic Group D and DHVEG-1	Un_Marine Benthic Group D and DHVEG-1		0	0	0	0	0	0	0	33	40	23	0	0	0	0	0	83	46	48	0	0	0	0	0	0	0	0	0	20	0	35	110	82	125	0	0	0	0	0	0	0	0
A_ASV00349	Archaea	Crenarchaeota	Bathyarchaeia	Un_Bathyarchaeia	Un_Bathyarchaeia	Un_Bathyarchaeia	Un_Bathyarchaeia		0	0	0	0	0	0	0	0	0	0	0	0	0	0	0	0	0	0	0	0	0	642	0	0	0	0	0	0	0	0	0	0	0	0	0	0	0	0	0	0	0
A_ASV00350	Archaea	Crenarchaeota	Bathyarchaeia	Un_Bathyarchaeia	Un_Bathyarchaeia	Un_Bathyarchaeia	Un_Bathyarchaeia		0	0	0	0	0	0	0	0	0	0	0	0	0	0	0	0	0	0	0	0	0	0	0	585	0	0	0	0	0	0	47	0	0	0	0	0	0	0	0	0	0
A_ASV00351	Archaea	Crenarchaeota	Bathyarchaeia	Un_Bathyarchaeia	Un_Bathyarchaeia	Un_Bathyarchaeia	Un_Bathyarchaeia		0	0	0	0	0	0	0	0	108	0	0	0	0	0	0	0	0	0	0	0	0	0	0	0	0	0	0	0	0	0	0	0	0	90	259	174	0	0	0	0	0
A_ASV00354	Archaea	Crenarchaeota	Nitrososphaeria	Nitrosopumilales	Nitrosopumilaceae	Candidatus Nitrosopumilus	Un_Candidatus Nitrosopumilus		0	0	0	0	0	0	0	0	0	0	0	0	108	0	0	0	0	0	0	0	0	522	0	0	0	0	0	0	0	0	0	0	0	0	0	0	0	0	0	0	0
A_ASV00356	Archaea	Crenarchaeota	Bathyarchaeia	Un_Bathyarchaeia	Un_Bathyarchaeia	Un_Bathyarchaeia	Un_Bathyarchaeia		0	0	0	0	0	0	0	0	0	0	0	0	0	0	0	0	0	0	0	0	0	0	0	624	0	0	0	0	0	0	0	0	0	0	0	0	0	0	0	0	0
A_ASV00355	Archaea	Nanoarchaeota	Nanoarchaeia	Woesearchaeales	Un_Woesearchaeales	Un_Woesearchaeales	Un_Woesearchaeales		0	0	0	0	0	0	0	0	0	0	0	0	0	0	0	0	0	0	0	0	0	624	0	0	0	0	0	0	0	0	0	0	0	0	0	0	0	0	0	0	0
A_ASV00357	Archaea	Thermoplasmatota	Thermoplasmata	Un_Thermoplasmata	Un_Thermoplasmata	Un_Thermoplasmata	Un_Thermoplasmata		0	0	0	0	0	0	0	0	0	0	0	0	0	0	0	0	0	0	0	0	0	0	0	0	0	0	0	0	0	0	100	104	54	0	365	0	0	0	0	0	0
A_ASV00360	Archaea	Asgardarchaeota	Lokiarchaeia	Lokiarchaeia	Lokiarchaeia	Lokiarchaeia	Lokiarchaeia		0	31	29	0	0	0	67	96	0	70	0	0	0	0	0	50	35	39	0	0	0	0	0	0	0	0	0	0	0	0	0	0	0	111	0	0	0	0	0	0	66
A_ASV00361	Archaea	Crenarchaeota	Bathyarchaeia	Un_Bathyarchaeia	Un_Bathyarchaeia	Un_Bathyarchaeia	Un_Bathyarchaeia		0	0	0	0	0	0	0	0	0	0	0	0	0	0	0	0	0	0	0	0	0	0	0	0	619	0	0	0	0	0	0	0	0	0	0	0	0	0	0	0	0
A_ASV00362	Archaea	Crenarchaeota	Nitrososphaeria	Nitrosopumilales	Nitrosopumilaceae	Un_Nitrosopumilaceae	Un_Nitrosopumilaceae		0	0	0	0	0	0	0	0	0	0	0	0	0	0	0	0	0	0	0	0	0	0	0	0	0	0	0	0	0	0	0	0	0	0	0	0	129	123	141	65	0
A_ASV00367	Archaea	Crenarchaeota	Bathyarchaeia	Un_Bathyarchaeia	Un_Bathyarchaeia	Un_Bathyarchaeia	Un_Bathyarchaeia		39	0	0	0	0	45	57	92	0	0	0	0	0	0	0	0	0	0	0	0	0	0	0	0	0	0	0	0	0	0	0	0	0	0	0	0	0	0	0	0	50
A_ASV00368	Archaea	Crenarchaeota	Nitrososphaeria	Nitrosopumilales	Nitrosopumilaceae	Un_Nitrosopumilaceae	Un_Nitrosopumilaceae		0	0	0	0	0	0	0	0	0	0	0	0	0	0	0	0	0	0	0	606	0	0	0	0	0	0	0	0	0	0	0	0	0	0	0	0	0	0	0	0	0
A_ASV00369	Archaea	Hydrothermarchaeota	Hydrothermarchaeia	Hydrothermarchaeales	Un_Hydrothermarchaeales	Un_Hydrothermarchaeales	Un_Hydrothermarchaeales		0	0	0	0	0	0	0	0	0	0	0	0	0	0	0	0	0	0	0	0	0	0	0	0	0	0	0	0	0	0	0	0	0	0	0	0	0	0	0	68	277
A_ASV00370	Archaea	Thermoplasmatota	Thermoplasmata	Marine Benthic Group D and DHVEG-1	Un_Marine Benthic Group D and DHVEG-1	Un_Marine Benthic Group D and DHVEG-1	Un_Marine Benthic Group D and DHVEG-1		0	0	0	0	0	29	65	71	0	49	0	38	0	47	55	0	0	0	63	0	0	0	0	0	0	0	0	0	27	0	73	0	85	0	0	0	0	0	0	0	0
A_ASV00371	Archaea	Thermoplasmatota	Thermoplasmata	Marine Benthic Group D and DHVEG-1	Un_Marine Benthic Group D and DHVEG-1	Un_Marine Benthic Group D and DHVEG-1	Un_Marine Benthic Group D and DHVEG-1		0	0	0	0	0	0	0	0	0	70	0	59	0	0	44	86	51	0	0	0	0	0	0	0	0	0	0	0	0	0	0	0	0	158	0	0	0	0	0	0	0
A_ASV00372	Archaea	Crenarchaeota	Bathyarchaeia	Un_Bathyarchaeia	Un_Bathyarchaeia	Un_Bathyarchaeia	Un_Bathyarchaeia		0	0	0	0	0	0	0	0	0	0	0	0	0	0	0	0	0	0	0	0	0	0	0	0	0	0	595	0	0	0	0	0	0	0	0	0	0	0	0	0	0
A_ASV00373	Archaea	Crenarchaeota	Bathyarchaeia	Un_Bathyarchaeia	Un_Bathyarchaeia	Un_Bathyarchaeia	Un_Bathyarchaeia		0	0	0	0	0	0	0	0	0	0	0	0	0	0	0	0	0	0	0	0	0	0	0	0	0	594	0	0	0	0	0	0	0	0	0	0	0	0	0	0	0
A_ASV00374	Archaea	Crenarchaeota	Bathyarchaeia	Un_Bathyarchaeia	Un_Bathyarchaeia	Un_Bathyarchaeia	Un_Bathyarchaeia		0	0	0	0	0	0	0	0	0	0	0	0	0	0	0	0	0	0	0	0	0	0	0	0	0	0	0	0	0	0	0	0	0	0	357	0	0	0	0	0	0
A_ASV00376	Archaea	Asgardarchaeota	Lokiarchaeia	Lokiarchaeia	Lokiarchaeia	Lokiarchaeia	Lokiarchaeia		0	0	0	19	0	0	51	0	32	0	0	0	0	12	0	0	0	0	0	0	0	276	0	0	0	0	0	0	0	0	0	0	0	0	0	0	10	0	0	0	35
A_ASV00375	Archaea	Thermoplasmatota	Thermoplasmata	Un_Thermoplasmata	Un_Thermoplasmata	Un_Thermoplasmata	Un_Thermoplasmata		0	41	0	0	0	0	0	0	0	0	0	0	0	0	0	0	0	0	0	0	0	533	0	0	0	0	0	0	16	0	0	0	0	0	0	0	0	0	0	0	0
A_ASV00378	Archaea	Crenarchaeota	Bathyarchaeia	Un_Bathyarchaeia	Un_Bathyarchaeia	Un_Bathyarchaeia	Un_Bathyarchaeia		0	0	0	0	0	0	0	0	0	0	0	0	0	0	0	0	0	0	0	0	0	0	0	0	0	0	585	0	0	0	0	0	0	0	0	0	0	0	0	0	0
A_ASV00377	Archaea	Thermoplasmatota	Thermoplasmata	Un_Thermoplasmata	Un_Thermoplasmata	Un_Thermoplasmata	Un_Thermoplasmata		0	0	0	69	61	0	35	0	0	0	0	0	0	0	80	98	0	84	0	0	0	0	0	0	0	0	0	0	0	0	0	0	66	50	0	0	0	0	0	0	0
A_ASV00379	Archaea	Crenarchaeota	Bathyarchaeia	Un_Bathyarchaeia	Un_Bathyarchaeia	Un_Bathyarchaeia	Un_Bathyarchaeia		0	0	0	0	0	0	0	0	0	0	0	0	0	0	0	0	0	0	0	0	0	0	0	0	0	0	0	0	0	0	0	0	0	117	466	0	0	0	0	0	0
A_ASV00383	Archaea	Crenarchaeota	Bathyarchaeia	Un_Bathyarchaeia	Un_Bathyarchaeia	Un_Bathyarchaeia	Un_Bathyarchaeia		0	0	0	0	0	0	0	0	0	0	0	0	0	0	0	0	0	0	0	0	0	0	0	0	0	0	0	0	0	0	0	0	0	0	0	0	0	0	0	281	71
A_ASV00381	Archaea	Crenarchaeota	Nitrososphaeria	Nitrosopumilales	Nitrosopumilaceae	Un_Nitrosopumilaceae	Un_Nitrosopumilaceae		0	0	0	0	0	0	0	0	0	0	0	0	0	0	0	0	0	0	0	581	0	0	0	0	0	0	0	0	0	0	0	0	0	0	0	0	0	0	0	0	0
A_ASV00384	Archaea	Crenarchaeota	Nitrososphaeria	Nitrosopumilales	Nitrosopumilaceae	Un_Nitrosopumilaceae	Un_Nitrosopumilaceae		0	0	0	0	0	0	0	0	0	0	0	0	0	0	0	0	0	0	0	0	0	0	0	0	0	0	0	0	0	0	0	0	0	0	0	0	143	0	0	64	121
A_ASV00386	Archaea	Crenarchaeota	Bathyarchaeia	Un_Bathyarchaeia	Un_Bathyarchaeia	Un_Bathyarchaeia	Un_Bathyarchaeia		0	0	0	0	0	0	0	0	0	0	0	0	0	0	0	0	0	0	0	0	0	0	0	0	0	579	0	0	0	0	0	0	0	0	0	0	0	0	0	0	0
A_ASV00387	Archaea	Asgardarchaeota	Lokiarchaeia	Lokiarchaeia	Lokiarchaeia	Lokiarchaeia	Lokiarchaeia		0	0	0	0	0	0	0	0	0	0	0	0	0	0	0	0	0	54	0	0	0	0	0	0	0	0	0	93	0	0	116	121	0	19	174	0	0	0	0	0	0
A_ASV00388	Archaea	Nanoarchaeota	Nanoarchaeia	Woesearchaeales	Un_Woesearchaeales	Un_Woesearchaeales	Un_Woesearchaeales		0	0	0	0	0	0	0	0	0	0	0	0	0	0	0	0	0	0	0	575	0	0	0	0	0	0	0	0	0	0	0	0	0	0	0	0	0	0	0	0	0
A_ASV00390	Archaea	Crenarchaeota	Bathyarchaeia	Un_Bathyarchaeia	Un_Bathyarchaeia	Un_Bathyarchaeia	Un_Bathyarchaeia		0	0	0	0	0	0	0	0	0	0	0	0	0	0	0	0	0	0	0	0	0	0	0	0	0	0	567	0	0	0	0	0	0	0	0	0	0	0	0	0	0
A_ASV00391	Archaea	Crenarchaeota	Bathyarchaeia	Un_Bathyarchaeia	Un_Bathyarchaeia	Un_Bathyarchaeia	Un_Bathyarchaeia		0	0	0	0	0	72	0	92	82	0	0	0	0	0	0	0	0	0	0	0	0	0	0	0	0	0	0	0	100	90	0	0	0	0	0	0	0	0	0	0	67
A_ASV00392	Archaea	Crenarchaeota	Bathyarchaeia	Un_Bathyarchaeia	Un_Bathyarchaeia	Un_Bathyarchaeia	Un_Bathyarchaeia		0	0	0	0	0	0	0	0	0	0	0	0	0	0	0	0	0	0	145	0	0	0	0	421	0	0	0	0	0	0	0	0	0	0	0	0	0	0	0	0	0
A_ASV00393	Archaea	Crenarchaeota	Bathyarchaeia	Un_Bathyarchaeia	Un_Bathyarchaeia	Un_Bathyarchaeia	Un_Bathyarchaeia		0	0	0	0	0	0	0	0	0	0	0	0	0	79	0	0	0	0	0	0	0	0	0	0	0	0	0	0	0	0	100	113	0	270	0	0	0	0	0	0	0
A_ASV00394	Archaea	Crenarchaeota	Bathyarchaeia	Un_Bathyarchaeia	Un_Bathyarchaeia	Un_Bathyarchaeia	Un_Bathyarchaeia		0	0	0	0	0	0	0	0	0	0	0	0	0	0	0	0	0	0	0	0	0	0	0	561	0	0	0	0	0	0	0	0	0	0	0	0	0	0	0	0	0
A_ASV00399	Archaea	Crenarchaeota	Bathyarchaeia	Un_Bathyarchaeia	Un_Bathyarchaeia	Un_Bathyarchaeia	Un_Bathyarchaeia		0	0	0	0	0	0	0	0	0	0	0	0	0	0	0	0	0	0	0	0	0	0	0	0	0	0	0	0	0	0	0	0	0	0	0	0	0	0	0	131	58
A_ASV00398	Archaea	Thermoplasmatota	Thermoplasmata	Marine Benthic Group D and DHVEG-1	Un_Marine Benthic Group D and DHVEG-1	Un_Marine Benthic Group D and DHVEG-1	Un_Marine Benthic Group D and DHVEG-1		0	0	0	0	38	0	0	0	51	0	40	0	48	0	0	115	90	64	0	0	0	0	0	0	0	0	0	0	0	0	0	31	0	0	0	79	0	0	0	0	0
A_ASV00400	Archaea	Thermoplasmatota	Thermoplasmata	Marine Benthic Group D and DHVEG-1	Un_Marine Benthic Group D and DHVEG-1	Un_Marine Benthic Group D and DHVEG-1	Un_Marine Benthic Group D and DHVEG-1		0	0	83	0	0	0	0	0	0	0	0	0	104	207	0	0	0	0	61	0	0	0	0	0	0	0	0	0	0	0	0	0	0	93	0	0	0	0	0	0	0
A_ASV00401	Archaea	Thermoplasmatota	Thermoplasmata	Un_Thermoplasmata	Un_Thermoplasmata	Un_Thermoplasmata	Un_Thermoplasmata		0	0	0	0	20	20	0	0	0	23	54	0	67	0	56	49	0	53	0	0	0	0	0	0	0	0	0	0	0	26	46	60	73	0	0	0	0	0	0	0	0
A_ASV00404	Archaea	Crenarchaeota	Bathyarchaeia	Un_Bathyarchaeia	Un_Bathyarchaeia	Un_Bathyarchaeia	Un_Bathyarchaeia		0	0	0	0	0	31	30	82	56	0	0	0	0	0	0	0	0	0	0	0	0	0	0	0	0	0	0	0	0	0	0	0	0	0	0	0	17	0	0	0	30
A_ASV00405	Archaea	Hydrothermarchaeota	Hydrothermarchaeia	Hydrothermarchaeales	Un_Hydrothermarchaeales	Un_Hydrothermarchaeales	Un_Hydrothermarchaeales		0	0	0	0	0	0	0	0	0	0	0	0	42	16	0	0	0	0	0	0	0	0	0	0	470	0	0	0	12	0	0	0	0	0	0	0	0	0	0	0	0
A_ASV00406	Archaea	Nanoarchaeota	Nanoarchaeia	Woesearchaeales	Un_Woesearchaeales	Un_Woesearchaeales	Un_Woesearchaeales		0	0	0	0	0	0	0	0	0	0	0	0	0	0	0	0	0	0	0	0	0	539	0	0	0	0	0	0	0	0	0	0	0	0	0	0	0	0	0	0	0
A_ASV00407	Archaea	Crenarchaeota	Bathyarchaeia	Un_Bathyarchaeia	Un_Bathyarchaeia	Un_Bathyarchaeia	Un_Bathyarchaeia		0	0	57	0	6	114	4	27	6	23	0	0	87	0	59	0	50	25	0	0	0	0	0	0	0	0	8	0	0	30	22	0	0	3	2	11	0	0	0	0	0
A_ASV00408	Archaea	Nanoarchaeota	Nanoarchaeia	Woesearchaeales	Un_Woesearchaeales	Un_Woesearchaeales	Un_Woesearchaeales		0	0	0	0	0	0	0	0	0	0	0	0	0	0	0	0	0	0	0	533	0	0	0	0	0	0	0	0	0	0	0	0	0	0	0	0	0	0	0	0	0
A_ASV00409	Archaea	Halobacterota	Methanosarcinia	Methanosarciniales	Methanosarcinaceae	Methanosarcina	Un_Methanosarcina		0	0	0	0	0	0	0	0	0	0	0	0	0	0	0	0	0	0	0	0	0	0	0	0	0	0	0	0	0	0	0	0	0	0	532	0	0	0	0	0	0
A_ASV00410	Archaea	Crenarchaeota	Bathyarchaeia	Un_Bathyarchaeia	Un_Bathyarchaeia	Un_Bathyarchaeia	Un_Bathyarchaeia		0	0	0	0	0	0	0	0	0	0	0	0	0	0	0	0	0	0	0	0	0	0	0	0	0	0	531	0	0	0	0	0	0	0	0	0	0	0	0	0	0
A_ASV00412	Archaea	Crenarchaeota	Bathyarchaeia	Un_Bathyarchaeia	Un_Bathyarchaeia	Un_Bathyarchaeia	Un_Bathyarchaeia		0	0	0	0	0	0	0	0	0	0	0	0	0	0	0	0	0	0	0	0	0	0	0	0	526	0	0	0	0	0	0	0	0	0	0	0	0	0	0	0	0
A_ASV00414	Archaea	Crenarchaeota	Bathyarchaeia	Un_Bathyarchaeia	Un_Bathyarchaeia	Un_Bathyarchaeia	Un_Bathyarchaeia		0	0	0	0	0	0	0	0	0	0	0	0	0	0	0	0	0	0	134	0	0	0	0	0	0	0	0	134	0	0	0	0	0	0	253	0	0	0	0	0	0
A_ASV00416	Archaea	Crenarchaeota	Bathyarchaeia	Un_Bathyarchaeia	Un_Bathyarchaeia	Un_Bathyarchaeia	Un_Bathyarchaeia		0	0	0	0	0	0	0	0	13	0	13	0	9	0	39	50	59	45	0	0	0	0	0	0	0	0	0	0	0	0	0	18	28	157	52	0	15	0	0	0	0
A_ASV00420	Archaea	Crenarchaeota	Bathyarchaeia	Un_Bathyarchaeia	Un_Bathyarchaeia	Un_Bathyarchaeia	Un_Bathyarchaeia		0	0	0	0	0	0	0	0	0	0	0	0	0	0	0	0	0	0	0	0	0	0	379	0	0	0	0	0	0	0	0	0	0	0	0	132	0	0	0	0	0
A_ASV00419	Archaea	Crenarchaeota	Nitrososphaeria	Nitrosopumilales	Nitrosopumilaceae	Candidatus Nitrosopumilus	Un_Candidatus Nitrosopumilus		0	0	0	0	0	0	0	0	0	0	0	0	0	0	0	0	0	0	0	511	0	0	0	0	0	0	0	0	0	0	0	0	0	0	0	0	0	0	0	0	0
A_ASV00421	Archaea	Micrarchaeota	Micrarchaeia	Micrarchaeales	Un_Micrarchaeales	Un_Micrarchaeales	Un_Micrarchaeales		0	0	0	0	0	0	0	0	0	0	0	0	0	0	0	0	0	0	0	0	507	0	0	0	0	0	0	0	0	0	0	0	0	0	0	0	0	0	0	0	0
A_ASV00422	Archaea	Crenarchaeota	Nitrososphaeria	Nitrosopumilales	Nitrosopumilaceae	Un_Nitrosopumilaceae	Un_Nitrosopumilaceae		0	0	0	0	0	0	0	0	0	0	0	0	0	0	0	0	0	0	0	0	0	0	0	0	0	0	0	0	0	0	0	0	0	0	0	0	107	178	200	0	0
A_ASV00423	Archaea	Crenarchaeota	Bathyarchaeia	Un_Bathyarchaeia	Un_Bathyarchaeia	Un_Bathyarchaeia	Un_Bathyarchaeia		0	0	0	0	18	0	0	95	58	0	0	0	0	0	0	0	0	0	0	0	0	0	0	0	0	0	0	0	0	0	0	0	0	104	0	0	21	0	0	107	0
A_ASV00425	Archaea	Crenarchaeota	Bathyarchaeia	Un_Bathyarchaeia	Un_Bathyarchaeia	Un_Bathyarchaeia	Un_Bathyarchaeia		0	0	0	0	0	0	0	0	0	0	0	0	0	0	0	0	0	0	32	0	0	0	0	0	0	178	0	0	0	0	0	0	0	0	0	291	0	0	0	0	0
A_ASV00427	Archaea	Crenarchaeota	Bathyarchaeia	Un_Bathyarchaeia	Un_Bathyarchaeia	Un_Bathyarchaeia	Un_Bathyarchaeia		0	0	0	0	0	0	0	0	0	0	0	0	0	0	0	0	0	0	0	0	0	0	0	0	0	0	496	0	0	0	0	0	0	0	0	0	0	0	0	0	0
A_ASV00428	Archaea	Halobacterota	Methanocellia	Methanocellales	Methanocellaceae	Rice Cluster I	Un_Rice Cluster I		0	0	0	0	0	0	0	0	0	0	0	0	0	0	0	0	0	0	0	495	0	0	0	0	0	0	0	0	0	0	0	0	0	0	0	0	0	0	0	0	0
A_ASV00429	Archaea	Crenarchaeota	Bathyarchaeia	Un_Bathyarchaeia	Un_Bathyarchaeia	Un_Bathyarchaeia	Un_Bathyarchaeia		0	0	0	0	0	0	0	0	0	0	0	0	0	0	0	0	0	0	0	0	0	0	0	0	0	492	0	0	0	0	0	0	0	0	0	0	0	0	0	0	0
A_ASV00434	Archaea	Crenarchaeota	Bathyarchaeia	Un_Bathyarchaeia	Un_Bathyarchaeia	Un_Bathyarchaeia	Un_Bathyarchaeia		0	0	0	0	0	0	0	0	0	0	0	0	0	0	0	0	0	0	0	0	0	0	0	0	488	0	0	0	0	0	0	0	0	0	0	0	0	0	0	0	0
A_ASV00435	Archaea	Crenarchaeota	Bathyarchaeia	Un_Bathyarchaeia	Un_Bathyarchaeia	Un_Bathyarchaeia	Un_Bathyarchaeia		0	0	0	0	0	0	0	0	0	0	0	0	0	0	0	0	0	0	0	0	0	0	0	0	485	0	0	0	0	0	0	0	0	0	0	0	0	0	0	0	0
A_ASV00438	Archaea	Un_Archaea	Un_Archaea	Un_Archaea	Un_Archaea	Un_Archaea	Un_Archaea		0	0	0	0	0	0	0	0	0	0	0	0	0	0	0	0	11	0	0	0	0	0	0	468	0	0	0	0	0	0	0	0	0	0	0	0	0	0	0	0	0
A_ASV00439	Archaea	Crenarchaeota	Bathyarchaeia	Un_Bathyarchaeia	Un_Bathyarchaeia	Un_Bathyarchaeia	Un_Bathyarchaeia		53	0	0	38	79	0	77	0	0	52	0	0	0	0	0	0	40	42	0	0	0	0	0	0	0	0	0	27	0	0	0	67	0	0	0	0	0	0	0	0	0
A_ASV00440	Archaea	Nanoarchaeota	Nanoarchaeia	Woesearchaeales	Un_Woesearchaeales	Un_Woesearchaeales	Un_Woesearchaeales		0	0	13	0	0	0	0	0	0	0	0	0	0	0	0	0	38	0	0	0	0	0	0	0	0	0	0	0	0	0	0	40	0	0	0	364	0	0	0	0	0
A_ASV00443	Archaea	Crenarchaeota	Nitrososphaeria	Nitrosopumilales	Nitrosopumilaceae	Candidatus Nitrosopumilus	Un_Candidatus Nitrosopumilus		0	0	0	0	0	0	0	0	0	0	0	0	0	0	0	0	0	0	0	473	0	0	0	0	0	0	0	0	0	0	0	0	0	0	0	0	0	0	0	0	0
A_ASV00444	Archaea	Un_Archaea	Un_Archaea	Un_Archaea	Un_Archaea	Un_Archaea	Un_Archaea		0	0	0	0	0	20	33	0	0	0	0	0	0	0	0	34	0	0	0	0	0	0	0	0	0	108	0	0	29	16	49	50	41	0	0	0	0	0	12	0	30
A_ASV00446	Archaea	Crenarchaeota	Bathyarchaeia	Un_Bathyarchaeia	Un_Bathyarchaeia	Un_Bathyarchaeia	Un_Bathyarchaeia		0	0	0	0	0	0	0	0	0	0	0	0	0	0	0	0	0	0	0	0	0	0	0	0	0	0	470	0	0	0	0	0	0	0	0	0	0	0	0	0	0
A_ASV00445	Archaea	Thermoplasmatota	Thermoplasmata	Un_Thermoplasmata	Un_Thermoplasmata	Un_Thermoplasmata	Un_Thermoplasmata		0	0	0	0	16	0	15	0	0	0	0	0	0	0	0	0	0	0	101	0	0	0	0	0	0	0	0	0	0	0	0	0	0	50	0	215	0	0	0	73	0
A_ASV00447	Archaea	Crenarchaeota	Bathyarchaeia	Un_Bathyarchaeia	Un_Bathyarchaeia	Un_Bathyarchaeia	Un_Bathyarchaeia		0	0	0	0	0	0	0	0	83	0	0	0	0	86	0	0	0	0	0	0	0	0	0	0	0	0	0	0	0	0	0	0	0	0	201	0	0	12	0	0	0
A_ASV00449	Archaea	Nanoarchaeota	Nanoarchaeia	Woesearchaeales	Un_Woesearchaeales	Un_Woesearchaeales	Un_Woesearchaeales		0	0	0	0	0	0	0	0	0	0	0	0	0	0	0	0	0	0	0	0	469	0	0	0	0	0	0	0	0	0	0	0	0	0	0	0	0	0	0	0	0
A_ASV00450	Archaea	Crenarchaeota	Bathyarchaeia	Un_Bathyarchaeia	Un_Bathyarchaeia	Un_Bathyarchaeia	Un_Bathyarchaeia		0	0	0	0	0	0	0	0	0	0	0	0	0	0	0	0	0	0	42	0	0	0	0	0	0	0	0	0	0	0	0	0	0	85	69	204	0	0	0	0	0
A_ASV00451	Archaea	Nanoarchaeota	Nanoarchaeia	Woesearchaeales	Un_Woesearchaeales	Un_Woesearchaeales	Un_Woesearchaeales		0	0	0	17	0	0	0	0	0	0	23	50	75	77	60	52	36	28	0	0	0	0	0	0	0	0	0	32	0	17	0	0	0	0	0	0	0	0	0	0	0
A_ASV00452	Archaea	Thermoplasmatota	Thermoplasmata	Marine Benthic Group D and DHVEG-1	Un_Marine Benthic Group D and DHVEG-1	Un_Marine Benthic Group D and DHVEG-1	Un_Marine Benthic Group D and DHVEG-1		0	0	0	0	0	0	0	0	0	0	0	73	137	0	76	102	6	73	0	0	0	0	0	0	0	0	0	0	0	0	0	0	0	0	0	0	0	0	0	0	0
A_ASV00453	Archaea	Crenarchaeota	Bathyarchaeia	Un_Bathyarchaeia	Un_Bathyarchaeia	Un_Bathyarchaeia	Un_Bathyarchaeia		0	0	0	0	0	0	0	0	0	0	0	0	0	0	0	0	0	0	0	0	0	0	0	0	0	0	0	0	0	0	0	0	0	103	132	231	0	0	0	0	0
A_ASV00456	Archaea	Crenarchaeota	Bathyarchaeia	Un_Bathyarchaeia	Un_Bathyarchaeia	Un_Bathyarchaeia	Un_Bathyarchaeia		0	0	0	0	0	0	0	0	0	0	0	0	0	0	0	0	0	0	0	0	0	0	0	0	0	0	449	0	0	0	0	0	0	13	0	0	0	0	0	0	0
A_ASV00455	Archaea	Thermoplasmatota	Thermoplasmata	Un_Thermoplasmata	Un_Thermoplasmata	Un_Thermoplasmata	Un_Thermoplasmata		0	54	0	96	113	93	62	0	0	0	0	0	44	0	0	0	0	0	0	0	0	0	0	0	0	0	0	0	0	0	0	0	0	0	0	0	0	0	0	0	0
A_ASV00458	Archaea	Hydrothermarchaeota	Hydrothermarchaeia	Hydrothermarchaeales	Un_Hydrothermarchaeales	Un_Hydrothermarchaeales	Un_Hydrothermarchaeales		0	0	0	0	0	0	0	0	0	0	0	0	0	0	0	0	0	0	0	0	0	461	0	0	0	0	0	0	0	0	0	0	0	0	0	0	0	0	0	0	0
A_ASV00462	Archaea	Crenarchaeota	Nitrososphaeria	Nitrosopumilales	Nitrosopumilaceae	Un_Nitrosopumilaceae	Un_Nitrosopumilaceae		0	0	0	0	0	0	0	0	0	0	0	0	0	0	0	0	0	0	0	0	0	0	0	0	0	0	0	0	0	0	0	0	0	0	0	0	88	92	80	0	96
A_ASV00464	Archaea	Asgardarchaeota	Lokiarchaeia	Lokiarchaeia	Lokiarchaeia	Lokiarchaeia	Lokiarchaeia		0	0	0	0	0	0	0	0	0	0	0	0	0	0	43	0	0	0	0	0	0	0	0	0	0	0	405	0	0	0	0	0	0	0	0	0	0	0	0	0	0
A_ASV00465	Archaea	Thermoplasmatota	Thermoplasmata	Marine Benthic Group D and DHVEG-1	Un_Marine Benthic Group D and DHVEG-1	Un_Marine Benthic Group D and DHVEG-1	Un_Marine Benthic Group D and DHVEG-1		0	0	0	0	0	0	0	0	0	0	0	0	0	0	0	0	143	0	0	0	0	0	0	0	0	0	0	25	0	44	102	134	0	0	0	0	0	0	0	0	0
A_ASV00466	Archaea	Crenarchaeota	Bathyarchaeia	Un_Bathyarchaeia	Un_Bathyarchaeia	Un_Bathyarchaeia	Un_Bathyarchaeia		0	0	0	0	0	0	0	17	0	0	0	0	0	0	0	0	0	0	0	0	0	0	0	0	0	0	430	0	0	0	0	0	0	0	0	0	0	0	0	0	0
A_ASV00467	Archaea	Halobacterota	ANME-1	ANME-1b	Un_ANME-1b	Un_ANME-1b	Un_ANME-1b		0	0	0	0	0	0	0	0	0	0	0	0	0	0	0	0	0	0	0	0	0	0	0	0	0	0	0	0	0	0	0	0	0	0	442	0	0	0	0	0	0
A_ASV00468	Archaea	Nanoarchaeota	Nanoarchaeia	Woesearchaeales	GW2011_GWC1_47_15	Un_GW2011_GWC1_47_15	Un_GW2011_GWC1_47_15		0	0	0	0	0	0	0	0	0	0	0	0	0	0	0	0	0	0	0	0	0	441	0	0	0	0	0	0	0	0	0	0	0	0	0	0	0	0	0	0	0
A_ASV00469	Archaea	Crenarchaeota	Bathyarchaeia	Un_Bathyarchaeia	Un_Bathyarchaeia	Un_Bathyarchaeia	Un_Bathyarchaeia		0	0	0	0	0	0	0	0	0	0	0	0	0	0	0	0	0	0	0	0	0	0	0	0	0	0	440	0	0	0	0	0	0	0	0	0	0	0	0	0	0
A_ASV00470	Archaea	Crenarchaeota	Bathyarchaeia	Un_Bathyarchaeia	Un_Bathyarchaeia	Un_Bathyarchaeia	Un_Bathyarchaeia		0	0	0	0	0	50	0	74	0	0	0	0	0	0	33	0	0	0	51	0	0	0	0	0	0	0	0	0	0	55	0	55	53	0	66	0	0	0	0	0	0
A_ASV00472	Archaea	Crenarchaeota	Bathyarchaeia	Un_Bathyarchaeia	Un_Bathyarchaeia	Un_Bathyarchaeia	Un_Bathyarchaeia		0	0	7	0	21	21	0	0	71	0	0	0	30	0	0	0	0	0	0	0	0	0	0	0	0	0	0	0	21	8	0	0	0	64	117	74	0	0	0	0	0
A_ASV00474	Archaea	Crenarchaeota	Bathyarchaeia	Un_Bathyarchaeia	Un_Bathyarchaeia	Un_Bathyarchaeia	Un_Bathyarchaeia		0	0	0	0	0	0	0	0	0	0	0	0	0	0	0	0	0	0	0	0	0	0	0	0	0	0	433	0	0	0	0	0	0	0	0	0	0	0	0	0	0
A_ASV00475	Archaea	Crenarchaeota	Bathyarchaeia	Un_Bathyarchaeia	Un_Bathyarchaeia	Un_Bathyarchaeia	Un_Bathyarchaeia		0	0	0	0	0	0	0	0	0	0	0	0	0	0	0	0	0	0	0	0	0	0	0	0	0	0	0	0	0	0	0	0	0	0	432	0	0	0	0	0	0
A_ASV00478	Archaea	Asgardarchaeota	Un_Asgardarchaeota	Un_Asgardarchaeota	Un_Asgardarchaeota	Un_Asgardarchaeota	Un_Asgardarchaeota		0	0	0	0	0	0	0	0	0	0	0	0	0	0	0	0	0	0	0	0	0	0	0	0	0	430	0	0	0	0	0	0	0	0	0	0	0	0	0	0	0
A_ASV00476	Archaea	Crenarchaeota	Bathyarchaeia	Un_Bathyarchaeia	Un_Bathyarchaeia	Un_Bathyarchaeia	Un_Bathyarchaeia		0	69	0	0	63	0	0	0	0	0	0	41	0	0	0	0	0	0	0	0	0	0	0	0	0	0	0	0	0	0	0	0	0	0	0	0	0	0	0	0	72
A_ASV00480	Archaea	Asgardarchaeota	Lokiarchaeia	Lokiarchaeia	Lokiarchaeia	Lokiarchaeia	Lokiarchaeia		0	0	0	0	0	0	0	0	0	0	0	0	0	0	0	0	0	0	0	0	0	0	0	0	0	0	0	0	0	0	0	0	0	0	0	0	0	0	0	0	109
A_ASV00479	Archaea	Crenarchaeota	Bathyarchaeia	Un_Bathyarchaeia	Un_Bathyarchaeia	Un_Bathyarchaeia	Un_Bathyarchaeia		0	0	0	0	0	0	33	0	0	0	0	0	0	0	0	0	0	0	0	0	0	0	0	243	0	0	152	0	0	0	0	0	0	0	0	0	0	0	0	0	0
A_ASV00481	Archaea	Thermoplasmatota	Thermoplasmata	Marine Benthic Group D and DHVEG-1	Un_Marine Benthic Group D and DHVEG-1	Un_Marine Benthic Group D and DHVEG-1	Un_Marine Benthic Group D and DHVEG-1		0	0	0	0	0	0	0	0	0	0	0	0	0	0	0	0	0	0	0	0	0	0	0	0	0	0	0	0	0	0	0	0	0	0	427	0	0	0	0	0	0
A_ASV00483	Archaea	Crenarchaeota	Bathyarchaeia	Un_Bathyarchaeia	Un_Bathyarchaeia	Un_Bathyarchaeia	Un_Bathyarchaeia		0	16	0	0	0	0	34	23	0	0	0	0	0	0	0	0	0	0	0	0	0	0	0	0	0	0	0	0	0	0	0	0	0	0	0	0	0	0	0	34	52
A_ASV00484	Archaea	Nanoarchaeota	Nanoarchaeia	Woesearchaeales	Un_Woesearchaeales	Un_Woesearchaeales	Un_Woesearchaeales		0	0	0	0	0	0	0	0	0	0	0	0	0	0	0	0	0	0	0	0	419	0	0	0	0	0	0	0	0	0	0	0	0	0	0	0	0	0	0	0	0
A_ASV00486	Archaea	Crenarchaeota	Bathyarchaeia	Un_Bathyarchaeia	Un_Bathyarchaeia	Un_Bathyarchaeia	Un_Bathyarchaeia		0	0	0	0	0	0	0	0	0	0	0	0	0	0	0	0	0	0	0	0	0	0	0	418	0	0	0	0	0	0	0	0	0	0	0	0	0	0	0	0	0
A_ASV00485	Archaea	Crenarchaeota	Nitrososphaeria	Nitrosopumilales	Nitrosopumilaceae	Candidatus Nitrosopumilus	Un_Candidatus Nitrosopumilus		0	0	0	0	0	0	0	0	0	0	0	0	0	0	0	0	0	0	0	418	0	0	0	0	0	0	0	0	0	0	0	0	0	0	0	0	0	0	0	0	0
A_ASV00487	Archaea	Crenarchaeota	Bathyarchaeia	Un_Bathyarchaeia	Un_Bathyarchaeia	Un_Bathyarchaeia	Un_Bathyarchaeia		21	0	0	0	0	0	0	0	0	0	0	0	0	0	0	0	0	0	0	0	0	0	0	0	0	0	0	0	0	0	0	0	0	0	0	0	0	0	0	64	95
A_ASV00489	Archaea	Nanoarchaeota	Nanoarchaeia	Woesearchaeales	Un_Woesearchaeales	Un_Woesearchaeales	Un_Woesearchaeales		0	0	0	0	0	0	0	0	0	0	0	0	0	0	0	0	0	0	0	0	0	0	0	0	0	0	0	0	0	0	0	0	0	0	417	0	0	0	0	0	0
A_ASV00488	Archaea	Thermoplasmatota	Thermoplasmata	Un_Thermoplasmata	Un_Thermoplasmata	Un_Thermoplasmata	Un_Thermoplasmata		0	0	0	0	0	0	0	94	0	0	0	19	0	0	50	70	85	38	0	0	0	0	0	0	0	0	0	0	0	0	0	0	61	0	0	0	0	0	0	0	0
A_ASV00493	Archaea	Thermoplasmatota	Thermoplasmata	Marine Benthic Group D and DHVEG-1	Un_Marine Benthic Group D and DHVEG-1	Un_Marine Benthic Group D and DHVEG-1	Un_Marine Benthic Group D and DHVEG-1		50	0	0	0	33	0	70	47	100	0	0	0	0	0	0	0	75	37	0	0	0	0	0	0	0	0	0	0	0	0	0	0	0	0	0	0	0	0	0	0	0
A_ASV00494	Archaea	Crenarchaeota	Nitrososphaeria	Nitrosopumilales	Nitrosopumilaceae	Un_Nitrosopumilaceae	Un_Nitrosopumilaceae		0	0	0	0	0	0	0	0	0	0	0	0	0	0	0	0	0	0	0	0	0	0	0	0	0	0	0	0	0	0	0	0	0	0	0	0	0	149	179	0	0
A_ASV00495	Archaea	Crenarchaeota	Nitrososphaeria	Nitrosopumilales	Nitrosopumilaceae	Candidatus Nitrosopumilus	Un_Candidatus Nitrosopumilus		0	0	0	0	0	0	0	0	0	0	0	0	0	0	0	0	0	0	0	0	0	0	0	0	0	0	0	0	0	0	0	0	0	0	0	0	152	134	123	0	0
A_ASV00496	Archaea	Crenarchaeota	Bathyarchaeia	Un_Bathyarchaeia	Un_Bathyarchaeia	Un_Bathyarchaeia	Un_Bathyarchaeia		0	0	0	0	0	0	0	0	0	0	0	0	0	0	0	0	0	0	0	0	0	0	0	408	0	0	0	0	0	0	0	0	0	0	0	0	0	0	0	0	0
A_ASV00497	Archaea	Asgardarchaeota	Odinarchaeia	Un_Odinarchaeia	Un_Odinarchaeia	Un_Odinarchaeia	Un_Odinarchaeia		61	45	0	0	0	50	98	0	0	0	0	0	0	0	0	0	0	0	0	0	0	0	0	0	0	0	0	0	0	0	0	0	0	0	0	0	0	0	0	0	33
A_ASV00499	Archaea	Nanoarchaeota	Nanoarchaeia	Woesearchaeales	Un_Woesearchaeales	Un_Woesearchaeales	Un_Woesearchaeales		0	0	0	0	0	0	0	0	0	58	35	71	0	63	0	0	0	0	172	0	0	0	0	0	0	0	0	0	0	8	0	0	0	0	0	0	0	0	0	0	0
A_ASV00501	Archaea	Crenarchaeota	Nitrososphaeria	Nitrosopumilales	Nitrosopumilaceae	Un_Nitrosopumilaceae	Un_Nitrosopumilaceae		0	0	0	0	0	0	0	0	0	0	0	0	0	0	0	0	0	0	0	0	0	0	0	0	0	0	0	0	0	0	0	0	0	0	0	0	65	47	64	0	43
A_ASV00503	Archaea	Asgardarchaeota	Lokiarchaeia	Lokiarchaeia	Lokiarchaeia	Lokiarchaeia	Lokiarchaeia		0	0	0	0	0	0	0	0	121	0	0	0	0	0	0	0	0	0	182	0	0	0	0	0	0	0	0	99	0	0	0	0	0	0	0	0	0	0	0	0	0
A_ASV00504	Archaea	Nanoarchaeota	Nanoarchaeia	Woesearchaeales	Un_Woesearchaeales	Un_Woesearchaeales	Un_Woesearchaeales		0	0	0	0	0	0	0	0	0	0	0	0	0	0	0	0	0	0	0	400	0	0	0	0	0	0	0	0	0	0	0	0	0	0	0	0	0	0	0	0	0
A_ASV00506	Archaea	Crenarchaeota	Bathyarchaeia	Un_Bathyarchaeia	Un_Bathyarchaeia	Un_Bathyarchaeia	Un_Bathyarchaeia		0	0	0	0	0	0	0	0	0	0	0	0	0	0	0	0	0	0	0	0	0	0	0	399	0	0	0	0	0	0	0	0	0	0	0	0	0	0	0	0	0
A_ASV00507	Archaea	Nanoarchaeota	Nanoarchaeia	Woesearchaeales	Un_Woesearchaeales	Un_Woesearchaeales	Un_Woesearchaeales		0	0	0	0	0	0	0	0	0	40	43	81	23	0	49	0	0	0	138	0	0	0	0	0	0	0	0	0	0	24	0	0	0	0	0	0	0	0	0	0	0
A_ASV00508	Archaea	Crenarchaeota	Nitrososphaeria	Nitrosopumilales	Nitrosopumilaceae	Candidatus Nitrosopumilus	Un_Candidatus Nitrosopumilus		56	0	0	0	0	0	0	0	0	0	0	0	0	0	0	0	0	0	0	0	0	0	0	0	0	0	0	0	0	0	0	0	0	0	0	0	0	0	126	111	0
A_ASV00509	Archaea	Crenarchaeota	Nitrososphaeria	Nitrosopumilales	Nitrosopumilaceae	Candidatus Nitrosopumilus	Un_Candidatus Nitrosopumilus		0	0	0	0	0	0	0	0	0	0	0	0	0	0	0	0	0	0	0	0	0	0	0	0	0	0	0	0	0	0	0	0	0	0	0	0	93	140	163	0	0
A_ASV00510	Archaea	Thermoplasmatota	Thermoplasmata	Marine Benthic Group D and DHVEG-1	Un_Marine Benthic Group D and DHVEG-1	Un_Marine Benthic Group D and DHVEG-1	Un_Marine Benthic Group D and DHVEG-1		0	0	0	0	0	0	39	71	0	0	0	0	0	0	0	0	0	0	0	0	0	0	0	0	0	0	0	0	0	0	44	0	0	0	65	0	0	0	0	0	38
A_ASV00511	Archaea	Crenarchaeota	Bathyarchaeia	Un_Bathyarchaeia	Un_Bathyarchaeia	Un_Bathyarchaeia	Un_Bathyarchaeia		0	0	0	0	0	0	0	0	0	0	0	0	0	0	0	0	0	0	0	388	0	0	0	0	0	0	0	0	0	0	0	0	0	0	0	0	0	0	0	0	0
A_ASV00514	Archaea	Crenarchaeota	Bathyarchaeia	Un_Bathyarchaeia	Un_Bathyarchaeia	Un_Bathyarchaeia	Un_Bathyarchaeia		0	0	0	0	0	0	0	0	0	0	0	0	47	0	66	0	0	0	0	0	0	0	0	0	0	0	0	0	97	0	0	0	0	80	96	0	0	0	0	0	0
A_ASV00513	Archaea	Halobacterota	Methanomicrobia	Methanomicrobiales	Methanomicrobiaceae	Methanogenium	Un_Methanogenium		0	0	0	0	0	0	27	0	0	0	0	0	0	0	0	0	0	0	0	0	0	0	0	0	0	0	0	33	0	0	0	0	0	0	326	0	0	0	0	0	0
A_ASV00515	Archaea	Thermoplasmatota	Thermoplasmata	Marine Benthic Group D and DHVEG-1	Un_Marine Benthic Group D and DHVEG-1	Un_Marine Benthic Group D and DHVEG-1	Un_Marine Benthic Group D and DHVEG-1		0	0	0	0	0	0	0	0	91	22	0	0	60	0	81	56	63	0	0	0	0	0	0	0	0	0	0	0	0	0	0	0	0	0	11	0	0	0	0	0	0
A_ASV00516	Archaea	Crenarchaeota	Bathyarchaeia	Un_Bathyarchaeia	Un_Bathyarchaeia	Un_Bathyarchaeia	Un_Bathyarchaeia		0	0	0	0	0	0	0	0	0	0	0	0	0	0	0	0	0	0	0	0	0	0	0	0	0	383	0	0	0	0	0	0	0	0	0	0	0	0	0	0	0
A_ASV00517	Archaea	Crenarchaeota	Bathyarchaeia	Un_Bathyarchaeia	Un_Bathyarchaeia	Un_Bathyarchaeia	Un_Bathyarchaeia		0	0	0	0	0	0	0	97	0	0	63	0	87	0	0	0	0	0	0	0	0	0	0	0	0	0	0	0	0	0	0	0	0	0	0	0	0	0	0	0	0
A_ASV00519	Archaea	Crenarchaeota	Bathyarchaeia	Un_Bathyarchaeia	Un_Bathyarchaeia	Un_Bathyarchaeia	Un_Bathyarchaeia		0	0	0	0	0	0	0	0	0	0	0	0	0	0	0	0	0	0	0	0	0	0	0	0	0	0	380	0	0	0	0	0	0	0	0	0	0	0	0	0	0
A_ASV00521	Archaea	Nanoarchaeota	Nanoarchaeia	Woesearchaeales	Un_Woesearchaeales	Un_Woesearchaeales	Un_Woesearchaeales		0	0	0	0	0	0	0	0	0	0	0	0	0	0	0	0	0	0	0	0	0	0	0	0	0	0	0	0	0	0	0	0	0	0	0	378	0	0	0	0	0
A_ASV00520	Archaea	Thermoplasmatota	Thermoplasmata	Marine Benthic Group D and DHVEG-1	Un_Marine Benthic Group D and DHVEG-1	Un_Marine Benthic Group D and DHVEG-1	Un_Marine Benthic Group D and DHVEG-1		0	0	0	0	0	0	0	0	23	0	0	0	68	50	0	0	54	0	0	0	0	0	0	0	0	0	0	0	0	0	0	39	61	82	0	1	0	0	0	0	0
A_ASV00522	Archaea	Crenarchaeota	Bathyarchaeia	Un_Bathyarchaeia	Un_Bathyarchaeia	Un_Bathyarchaeia	Un_Bathyarchaeia		0	0	32	0	0	0	68	68	135	0	0	0	0	0	0	0	0	0	0	0	0	0	0	0	0	0	0	0	0	0	0	0	0	0	0	0	0	0	0	0	0
A_ASV00523	Archaea	Asgardarchaeota	Un_Asgardarchaeota	Un_Asgardarchaeota	Un_Asgardarchaeota	Un_Asgardarchaeota	Un_Asgardarchaeota		0	0	0	0	50	0	0	122	69	0	0	0	0	0	0	0	22	0	7	0	0	0	0	0	0	0	0	0	0	0	0	0	0	0	0	0	0	0	0	0	70
A_ASV00524	Archaea	Crenarchaeota	Bathyarchaeia	Un_Bathyarchaeia	Un_Bathyarchaeia	Un_Bathyarchaeia	Un_Bathyarchaeia		2	0	0	76	7	1	3	11	0	0	0	0	0	4	59	1	0	46	0	0	0	0	0	0	0	0	0	47	1	7	70	0	0	0	1	1	0	0	0	0	3
A_ASV00525	Archaea	Thermoplasmatota	Thermoplasmata	Marine Benthic Group D and DHVEG-1	Un_Marine Benthic Group D and DHVEG-1	Un_Marine Benthic Group D and DHVEG-1	Un_Marine Benthic Group D and DHVEG-1		0	0	0	0	0	0	0	0	0	0	0	0	0	0	0	0	0	0	0	0	0	0	0	0	0	0	0	0	0	0	0	0	0	109	0	265	0	0	0	0	0
A_ASV00529	Archaea	Crenarchaeota	Bathyarchaeia	Un_Bathyarchaeia	Un_Bathyarchaeia	Un_Bathyarchaeia	Un_Bathyarchaeia		0	0	0	0	0	0	0	0	0	0	0	0	0	0	0	0	0	0	0	0	0	0	0	0	0	373	0	0	0	0	0	0	0	0	0	0	0	0	0	0	0
A_ASV00527	Archaea	Nanoarchaeota	Nanoarchaeia	Woesearchaeales	GW2011_GWC1_47_15	Un_GW2011_GWC1_47_15	Un_GW2011_GWC1_47_15		0	0	16	0	0	35	0	0	0	36	0	36	38	0	47	32	30	38	0	0	0	0	0	34	0	0	0	0	0	31	0	0	0	0	0	0	0	0	0	0	0
A_ASV00526	Archaea	Thermoplasmatota	Thermoplasmata	Marine Benthic Group D and DHVEG-1	Un_Marine Benthic Group D and DHVEG-1	Un_Marine Benthic Group D and DHVEG-1	Un_Marine Benthic Group D and DHVEG-1		34	0	0	0	0	31	23	106	32	0	0	0	0	0	0	0	0	0	0	0	0	0	0	0	0	0	0	0	0	0	0	0	0	0	0	0	0	0	0	0	38
A_ASV00531	Archaea	Asgardarchaeota	Odinarchaeia	Un_Odinarchaeia	Un_Odinarchaeia	Un_Odinarchaeia	Un_Odinarchaeia		0	0	0	0	0	0	0	0	0	0	0	0	0	0	0	0	0	0	0	0	0	0	0	0	0	0	0	0	0	0	0	0	0	0	372	0	0	0	0	0	0
A_ASV00530	Archaea	Thermoplasmatota	Thermoplasmata	Marine Benthic Group D and DHVEG-1	Un_Marine Benthic Group D and DHVEG-1	Un_Marine Benthic Group D and DHVEG-1	Un_Marine Benthic Group D and DHVEG-1		0	0	0	0	0	0	0	0	22	0	0	0	0	24	27	30	0	32	101	0	0	0	0	0	0	0	0	0	0	0	31	0	0	105	0	0	0	0	0	0	0
A_ASV00532	Archaea	Crenarchaeota	Bathyarchaeia	Un_Bathyarchaeia	Un_Bathyarchaeia	Un_Bathyarchaeia	Un_Bathyarchaeia		0	0	0	0	0	0	0	0	0	0	0	0	0	0	0	0	0	0	0	0	0	370	0	0	0	0	0	0	0	0	0	0	0	0	0	0	0	0	0	0	0
A_ASV00533	Archaea	Crenarchaeota	Bathyarchaeia	Un_Bathyarchaeia	Un_Bathyarchaeia	Un_Bathyarchaeia	Un_Bathyarchaeia		63	0	0	0	0	0	64	0	0	0	0	0	0	0	0	0	0	0	0	0	0	0	0	0	0	0	0	0	0	0	0	0	0	0	0	130	0	0	0	50	0
A_ASV00536	Archaea	Crenarchaeota	Bathyarchaeia	Un_Bathyarchaeia	Un_Bathyarchaeia	Un_Bathyarchaeia	Un_Bathyarchaeia		0	0	0	0	0	0	0	0	0	0	49	61	109	85	63	0	0	0	0	0	0	0	0	0	0	0	0	0	0	0	0	0	0	0	0	0	0	0	0	0	0
A_ASV00535	Archaea	Crenarchaeota	Nitrososphaeria	Nitrosopumilales	Nitrosopumilaceae	Un_Nitrosopumilaceae	Un_Nitrosopumilaceae		74	0	0	25	34	0	92	0	0	0	0	0	0	0	0	27	0	0	76	0	0	0	0	0	0	0	0	0	0	0	0	0	0	0	0	0	0	0	0	0	39
A_ASV00538	Archaea	Nanoarchaeota	Nanoarchaeia	Woesearchaeales	Un_Woesearchaeales	Un_Woesearchaeales	Un_Woesearchaeales		10	36	19	49	26	28	0	0	19	32	0	35	54	24	34	0	0	0	0	0	0	0	0	0	0	0	0	0	0	0	0	0	0	0	0	0	0	0	0	0	0
A_ASV00540	Archaea	Un_Archaea	Un_Archaea	Un_Archaea	Un_Archaea	Un_Archaea	Un_Archaea		0	0	0	0	0	0	0	0	43	0	0	0	0	0	0	0	0	0	0	0	0	0	0	0	0	0	0	0	0	0	0	0	0	0	0	322	0	0	0	0	0
A_ASV00539	Archaea	Thermoplasmatota	Thermoplasmata	Marine Benthic Group D and DHVEG-1	Un_Marine Benthic Group D and DHVEG-1	Un_Marine Benthic Group D and DHVEG-1	Un_Marine Benthic Group D and DHVEG-1		0	0	0	0	0	0	0	0	203	0	0	0	0	0	0	0	0	0	0	0	0	0	0	0	0	0	0	0	0	0	0	0	0	0	0	0	0	0	0	0	0
A_ASV00542	Archaea	Crenarchaeota	Bathyarchaeia	Un_Bathyarchaeia	Un_Bathyarchaeia	Un_Bathyarchaeia	Un_Bathyarchaeia		42	51	0	0	0	0	0	22	71	0	0	0	0	0	0	0	0	0	53	0	0	0	0	0	0	0	0	0	0	0	0	0	0	27	5	0	0	0	0	0	0
A_ASV00543	Archaea	Nanoarchaeota	Nanoarchaeia	Woesearchaeales	Un_Woesearchaeales	Un_Woesearchaeales	Un_Woesearchaeales		0	0	35	48	32	0	18	39	0	0	0	0	0	0	0	0	6	0	0	0	0	0	0	0	0	0	0	0	0	0	0	0	0	0	0	0	0	118	68	0	0
A_ASV00546	Archaea	Nanoarchaeota	Nanoarchaeia	Woesearchaeales	Un_Woesearchaeales	Un_Woesearchaeales	Un_Woesearchaeales		0	0	0	0	0	0	0	0	0	0	0	0	0	36	0	0	0	0	0	326	0	0	0	0	0	0	0	0	0	0	0	0	0	0	0	0	0	0	0	0	0
A_ASV00547	Archaea	Crenarchaeota	Bathyarchaeia	Un_Bathyarchaeia	Un_Bathyarchaeia	Un_Bathyarchaeia	Un_Bathyarchaeia		0	0	0	0	0	0	0	0	0	0	0	0	0	0	0	0	0	0	0	0	0	0	0	0	0	0	0	0	0	0	0	0	0	0	358	0	0	0	0	0	0
A_ASV00549	Archaea	Crenarchaeota	Bathyarchaeia	Un_Bathyarchaeia	Un_Bathyarchaeia	Un_Bathyarchaeia	Un_Bathyarchaeia		0	0	0	0	0	0	0	0	0	0	0	0	0	0	0	0	0	0	0	0	0	0	0	0	0	0	357	0	0	0	0	0	0	0	0	0	0	0	0	0	0
A_ASV00548	Archaea	Thermoplasmatota	Thermoplasmata	Marine Benthic Group D and DHVEG-1	Un_Marine Benthic Group D and DHVEG-1	Un_Marine Benthic Group D and DHVEG-1	Un_Marine Benthic Group D and DHVEG-1		0	0	0	0	0	0	0	0	0	0	0	0	0	0	0	36	59	43	0	0	0	0	0	0	0	0	0	0	0	37	67	57	58	0	0	0	0	0	0	0	0
A_ASV00550	Archaea	Crenarchaeota	Nitrososphaeria	Nitrosopumilales	Nitrosopumilaceae	Candidatus Nitrosopumilus	Un_Candidatus Nitrosopumilus		0	0	0	0	0	0	0	0	0	0	0	0	0	0	0	0	0	0	0	0	0	356	0	0	0	0	0	0	0	0	0	0	0	0	0	0	0	0	0	0	0
A_ASV00552	Archaea	Crenarchaeota	Bathyarchaeia	Un_Bathyarchaeia	Un_Bathyarchaeia	Un_Bathyarchaeia	Un_Bathyarchaeia		0	0	0	0	0	0	0	0	0	0	0	0	27	0	0	0	0	0	0	0	0	0	0	0	0	328	0	0	0	0	0	0	0	0	0	0	0	0	0	0	0
A_ASV00553	Archaea	Crenarchaeota	Nitrososphaeria	Nitrosopumilales	Nitrosopumilaceae	Candidatus Nitrosopumilus	Un_Candidatus Nitrosopumilus		0	0	0	0	0	0	0	0	0	0	0	0	0	0	0	0	0	0	0	0	0	0	0	0	355	0	0	0	0	0	0	0	0	0	0	0	0	0	0	0	0
A_ASV00557	Archaea	Crenarchaeota	Bathyarchaeia	Un_Bathyarchaeia	Un_Bathyarchaeia	Un_Bathyarchaeia	Un_Bathyarchaeia		0	0	0	0	0	0	0	0	0	0	0	0	0	0	0	0	0	0	0	0	0	0	0	349	0	0	0	0	0	0	0	0	0	0	0	0	0	0	0	0	0
A_ASV00559	Archaea	Crenarchaeota	Bathyarchaeia	Un_Bathyarchaeia	Un_Bathyarchaeia	Un_Bathyarchaeia	Un_Bathyarchaeia		0	0	0	0	0	22	0	0	0	0	0	0	0	0	0	0	0	0	0	0	0	0	0	0	0	0	0	0	0	0	0	0	0	72	0	0	0	0	0	0	49
A_ASV00560	Archaea	Crenarchaeota	Bathyarchaeia	Un_Bathyarchaeia	Un_Bathyarchaeia	Un_Bathyarchaeia	Un_Bathyarchaeia		0	0	0	0	0	0	0	0	0	0	0	0	0	0	0	0	0	0	0	0	0	0	0	0	0	0	139	0	0	0	0	0	0	0	209	0	0	0	0	0	0
A_ASV00562	Archaea	Hydrothermarchaeota	Hydrothermarchaeia	Hydrothermarchaeales	Un_Hydrothermarchaeales	Un_Hydrothermarchaeales	Un_Hydrothermarchaeales		0	0	0	0	0	0	0	0	0	0	0	0	0	0	0	0	0	0	0	0	0	0	0	0	0	0	0	0	0	0	0	0	0	0	0	0	80	99	108	0	0
A_ASV00564	Archaea	Crenarchaeota	Bathyarchaeia	Un_Bathyarchaeia	Un_Bathyarchaeia	Un_Bathyarchaeia	Un_Bathyarchaeia		0	0	0	0	0	0	0	0	0	0	0	0	0	0	0	0	0	0	0	0	0	0	0	0	0	0	0	0	0	0	0	0	0	86	0	258	0	0	0	0	0
A_ASV00565	Archaea	Thermoplasmatota	Thermoplasmata	Marine Benthic Group D and DHVEG-1	Un_Marine Benthic Group D and DHVEG-1	Un_Marine Benthic Group D and DHVEG-1	Un_Marine Benthic Group D and DHVEG-1		0	0	0	0	0	0	0	0	157	0	0	0	0	0	0	0	0	0	0	0	0	0	0	0	0	0	0	0	0	0	0	0	0	107	79	0	0	0	0	0	0
A_ASV00566	Archaea	Thermoplasmatota	Thermoplasmata	Marine Benthic Group D and DHVEG-1	Un_Marine Benthic Group D and DHVEG-1	Un_Marine Benthic Group D and DHVEG-1	Un_Marine Benthic Group D and DHVEG-1		0	0	0	0	0	0	0	0	0	0	0	0	0	0	0	0	0	0	0	0	0	0	0	0	0	0	0	0	0	0	0	0	0	112	0	0	0	0	0	168	0
A_ASV00568	Archaea	Nanoarchaeota	Nanoarchaeia	Woesearchaeales	GW2011	AR15	Un_AR15		0	0	0	0	0	0	0	0	0	0	0	0	0	0	0	0	0	0	0	0	0	0	0	0	0	0	0	0	0	0	0	0	0	0	0	0	270	71	0	0	0
A_ASV00569	Archaea	Nanoarchaeota	Nanoarchaeia	Woesearchaeales	Un_Woesearchaeales	Un_Woesearchaeales	Un_Woesearchaeales		0	0	0	0	0	0	0	0	0	0	0	0	0	0	0	0	0	0	0	0	0	338	0	0	0	0	0	0	0	0	0	0	0	0	0	0	0	0	0	0	0
A_ASV00572	Archaea	Crenarchaeota	Bathyarchaeia	Un_Bathyarchaeia	Un_Bathyarchaeia	Un_Bathyarchaeia	Un_Bathyarchaeia		0	0	0	0	0	0	0	0	0	0	0	0	0	0	0	0	0	0	0	0	0	0	0	0	0	0	0	0	0	0	93	0	0	138	106	0	0	0	0	0	0
A_ASV00570	Archaea	Crenarchaeota	Nitrososphaeria	Nitrosopumilales	Nitrosopumilaceae	Candidatus Nitrosopumilus	Un_Candidatus Nitrosopumilus		127	128	0	0	0	0	0	0	0	0	0	0	0	0	0	0	0	0	0	0	0	0	0	0	0	0	0	0	0	0	0	0	0	0	0	0	82	0	0	0	0
A_ASV00573	Archaea	Nanoarchaeota	Nanoarchaeia	Woesearchaeales	Un_Woesearchaeales	Un_Woesearchaeales	Un_Woesearchaeales		0	0	0	27	80	24	0	0	52	17	6	18	0	40	26	27	0	12	0	0	0	0	0	0	0	0	0	0	7	0	0	0	0	0	0	0	0	0	0	0	0
A_ASV00575	Archaea	Crenarchaeota	Bathyarchaeia	Un_Bathyarchaeia	Un_Bathyarchaeia	Un_Bathyarchaeia	Un_Bathyarchaeia		0	0	0	0	0	0	0	31	33	0	0	0	0	0	0	0	0	0	0	0	0	120	0	0	0	0	0	0	0	0	0	0	0	0	151	0	0	0	0	0	0
A_ASV00577	Archaea	Crenarchaeota	Bathyarchaeia	Un_Bathyarchaeia	Un_Bathyarchaeia	Un_Bathyarchaeia	Un_Bathyarchaeia		0	0	0	0	0	0	0	0	0	0	0	0	0	0	0	0	0	0	0	0	0	0	0	0	0	0	0	0	0	0	0	0	0	125	0	210	0	0	0	0	0
A_ASV00574	Archaea	Nanoarchaeota	Nanoarchaeia	Woesearchaeales	Un_Woesearchaeales	Un_Woesearchaeales	Un_Woesearchaeales		38	0	0	0	28	0	0	0	0	0	0	0	90	18	28	36	28	24	45	0	0	0	0	0	0	0	0	0	0	0	0	0	0	0	0	0	0	0	0	0	0
A_ASV00579	Archaea	Crenarchaeota	Bathyarchaeia	Un_Bathyarchaeia	Un_Bathyarchaeia	Un_Bathyarchaeia	Un_Bathyarchaeia		0	0	0	0	0	0	0	0	0	0	0	0	0	0	0	0	0	0	0	0	0	0	0	0	0	331	0	0	0	0	0	0	0	0	0	0	0	0	0	0	0
A_ASV00580	Archaea	Crenarchaeota	Bathyarchaeia	Un_Bathyarchaeia	Un_Bathyarchaeia	Un_Bathyarchaeia	Un_Bathyarchaeia		0	0	0	0	0	0	0	0	0	0	0	0	0	0	0	0	0	0	0	0	0	0	0	0	0	0	331	0	0	0	0	0	0	0	0	0	0	0	0	0	0
A_ASV00585	Archaea	Crenarchaeota	Bathyarchaeia	Un_Bathyarchaeia	Un_Bathyarchaeia	Un_Bathyarchaeia	Un_Bathyarchaeia		0	0	0	0	0	0	0	0	0	0	0	0	0	0	0	0	0	0	0	0	0	0	0	329	0	0	0	0	0	0	0	0	0	0	0	0	0	0	0	0	0
A_ASV00586	Archaea	Thermoplasmatota	Thermoplasmata	Marine Benthic Group D and DHVEG-1	Un_Marine Benthic Group D and DHVEG-1	Un_Marine Benthic Group D and DHVEG-1	Un_Marine Benthic Group D and DHVEG-1		0	0	0	0	0	0	0	0	0	0	0	0	0	0	0	0	0	0	0	0	0	0	0	0	0	329	0	0	0	0	0	0	0	0	0	0	0	0	0	0	0
A_ASV00587	Archaea	Crenarchaeota	Bathyarchaeia	Un_Bathyarchaeia	Un_Bathyarchaeia	Un_Bathyarchaeia	Un_Bathyarchaeia		0	7	0	0	0	0	15	0	78	14	0	0	0	0	14	0	0	0	0	0	0	0	0	0	0	0	0	0	0	0	0	0	0	114	0	0	0	0	0	0	0
A_ASV00588	Archaea	Nanoarchaeota	Nanoarchaeia	Woesearchaeales	Un_Woesearchaeales	Un_Woesearchaeales	Un_Woesearchaeales		0	0	0	0	0	0	0	0	0	43	0	0	0	50	49	34	31	37	0	0	0	0	0	0	0	0	0	0	0	55	0	0	28	0	0	0	0	0	0	0	0
A_ASV00590	Archaea	Crenarchaeota	Bathyarchaeia	Un_Bathyarchaeia	Un_Bathyarchaeia	Un_Bathyarchaeia	Un_Bathyarchaeia		0	0	0	32	0	78	0	94	0	0	0	0	0	0	36	0	0	0	0	0	0	0	0	0	0	0	0	0	0	0	33	0	0	0	0	0	0	0	0	0	0
A_ASV00594	Archaea	Thermoplasmatota	Thermoplasmata	Un_Thermoplasmata	Un_Thermoplasmata	Un_Thermoplasmata	Un_Thermoplasmata		0	0	0	0	0	0	0	0	0	0	0	0	0	0	41	56	92	77	0	0	0	0	0	0	0	0	0	25	25	0	0	0	0	0	0	0	0	0	0	0	0
A_ASV00595	Archaea	Crenarchaeota	Bathyarchaeia	Un_Bathyarchaeia	Un_Bathyarchaeia	Un_Bathyarchaeia	Un_Bathyarchaeia		116	0	0	0	0	0	0	0	0	0	0	0	0	0	0	0	0	0	0	0	0	0	0	0	0	0	0	0	0	0	0	0	0	0	0	133	0	0	0	0	0
A_ASV00597	Archaea	Thermoplasmatota	Thermoplasmata	Marine Benthic Group D and DHVEG-1	Un_Marine Benthic Group D and DHVEG-1	Un_Marine Benthic Group D and DHVEG-1	Un_Marine Benthic Group D and DHVEG-1		0	0	0	0	0	0	0	0	0	0	0	0	0	0	0	0	0	0	0	0	315	0	0	0	0	0	0	0	0	0	0	0	0	0	0	0	0	0	0	0	0
A_ASV00599	Archaea	Crenarchaeota	Nitrososphaeria	Nitrosopumilales	Nitrosopumilaceae	Un_Nitrosopumilaceae	Un_Nitrosopumilaceae		0	0	0	0	0	0	0	0	0	0	52	0	0	0	59	0	0	0	101	0	0	0	0	0	0	0	0	0	0	0	0	0	0	0	0	0	0	0	61	0	0
A_ASV00603	Archaea	Crenarchaeota	Nitrososphaeria	Nitrosopumilales	Nitrosopumilaceae	Candidatus Nitrosopumilus	Un_Candidatus Nitrosopumilus		0	62	33	0	0	0	0	0	0	0	0	0	0	0	0	0	0	0	0	0	0	0	0	0	0	0	0	0	0	0	0	0	0	0	0	0	88	63	67	0	0
A_ASV00605	Archaea	Thermoplasmatota	Thermoplasmata	Marine Benthic Group D and DHVEG-1	Un_Marine Benthic Group D and DHVEG-1	Un_Marine Benthic Group D and DHVEG-1	Un_Marine Benthic Group D and DHVEG-1		0	0	0	0	0	0	0	0	0	0	0	0	0	0	0	0	0	0	0	0	0	0	0	0	0	0	0	0	0	0	0	0	0	0	0	313	0	0	0	0	0
A_ASV00608	Archaea	Crenarchaeota	Bathyarchaeia	Un_Bathyarchaeia	Un_Bathyarchaeia	Un_Bathyarchaeia	Un_Bathyarchaeia		0	0	0	0	0	0	0	0	0	0	0	0	0	0	0	0	0	0	0	0	0	0	0	0	0	312	0	0	0	0	0	0	0	0	0	0	0	0	0	0	0
A_ASV00606	Archaea	Crenarchaeota	Bathyarchaeia	Un_Bathyarchaeia	Un_Bathyarchaeia	Un_Bathyarchaeia	Un_Bathyarchaeia		0	0	5	0	39	46	37	0	0	0	0	0	0	0	0	15	0	0	0	0	0	0	0	0	66	0	0	0	36	0	0	0	0	29	0	39	0	0	0	0	0
A_ASV00609	Archaea	Crenarchaeota	Bathyarchaeia	Un_Bathyarchaeia	Un_Bathyarchaeia	Un_Bathyarchaeia	Un_Bathyarchaeia		0	0	0	0	0	0	0	0	0	0	0	0	0	0	0	0	0	0	0	0	0	0	0	0	0	0	0	0	0	0	0	0	0	0	312	0	0	0	0	0	0
A_ASV00607	Archaea	Nanoarchaeota	Nanoarchaeia	Woesearchaeales	Un_Woesearchaeales	Un_Woesearchaeales	Un_Woesearchaeales		0	0	0	20	38	0	0	0	0	0	9	0	50	0	70	37	47	41	0	0	0	0	0	0	0	0	0	0	0	0	0	0	0	0	0	0	0	0	0	0	0
A_ASV00611	Archaea	Crenarchaeota	Bathyarchaeia	Un_Bathyarchaeia	Un_Bathyarchaeia	Un_Bathyarchaeia	Un_Bathyarchaeia		0	0	0	0	0	0	14	0	0	0	0	15	0	0	0	0	0	0	0	0	0	0	0	0	0	0	0	0	0	0	0	0	0	237	0	0	0	0	0	0	0
A_ASV00616	Archaea	Un_Archaea	Un_Archaea	Un_Archaea	Un_Archaea	Un_Archaea	Un_Archaea		0	0	0	0	0	0	0	0	0	0	0	0	0	0	0	0	0	0	0	301	0	0	0	0	0	0	0	0	0	0	0	0	0	0	0	0	0	0	0	0	0
A_ASV00615	Archaea	Nanoarchaeota	Nanoarchaeia	Woesearchaeales	Un_Woesearchaeales	Un_Woesearchaeales	Un_Woesearchaeales		0	0	0	38	45	0	0	0	0	0	0	0	0	33	56	36	48	45	0	0	0	0	0	0	0	0	0	0	0	0	0	0	0	0	0	0	0	0	0	0	0
A_ASV00619	Archaea	Thermoplasmatota	Thermoplasmata	Marine Benthic Group D and DHVEG-1	Un_Marine Benthic Group D and DHVEG-1	Un_Marine Benthic Group D and DHVEG-1	Un_Marine Benthic Group D and DHVEG-1		0	0	0	0	0	0	0	0	136	0	0	0	0	0	0	0	0	0	0	0	0	0	0	0	0	0	0	0	0	0	0	0	0	88	0	0	0	0	0	0	0
A_ASV00622	Archaea	Asgardarchaeota	Lokiarchaeia	Lokiarchaeia	Lokiarchaeia	Lokiarchaeia	Lokiarchaeia		0	0	0	0	0	0	0	0	0	67	0	0	0	68	0	0	0	0	0	0	0	0	0	0	0	0	0	0	0	0	103	54	0	0	3	0	0	0	0	0	0
A_ASV00623	Archaea	Nanoarchaeota	Nanoarchaeia	Woesearchaeales	Un_Woesearchaeales	Un_Woesearchaeales	Un_Woesearchaeales		0	0	0	0	0	0	0	0	0	0	0	0	0	0	0	0	0	0	0	0	295	0	0	0	0	0	0	0	0	0	0	0	0	0	0	0	0	0	0	0	0
A_ASV00626	Archaea	Crenarchaeota	Bathyarchaeia	Un_Bathyarchaeia	Un_Bathyarchaeia	Un_Bathyarchaeia	Un_Bathyarchaeia		0	0	0	0	0	0	0	0	0	0	0	0	0	0	0	0	0	0	141	0	0	0	0	0	0	0	0	0	0	0	0	0	0	0	0	153	0	0	0	0	0
A_ASV00625	Archaea	Crenarchaeota	Nitrososphaeria	Nitrosopumilales	Nitrosopumilaceae	Candidatus Nitrosopumilus	Un_Candidatus Nitrosopumilus		0	0	0	0	0	0	0	0	0	0	0	44	32	0	0	0	0	0	0	0	0	218	0	0	0	0	0	0	0	0	0	0	0	0	0	0	0	0	0	0	0
A_ASV00624	Archaea	Hydrothermarchaeota	Hydrothermarchaeia	Hydrothermarchaeales	Un_Hydrothermarchaeales	Un_Hydrothermarchaeales	Un_Hydrothermarchaeales		0	44	77	0	0	0	0	0	0	0	0	0	0	0	0	0	0	0	0	0	0	0	0	0	0	0	0	0	0	0	0	0	0	0	0	0	0	0	79	78	0
A_ASV00628	Archaea	Crenarchaeota	Bathyarchaeia	Un_Bathyarchaeia	Un_Bathyarchaeia	Un_Bathyarchaeia	Un_Bathyarchaeia		0	0	0	0	0	0	0	0	0	0	0	0	0	0	0	0	0	0	0	0	0	0	0	0	0	0	0	0	0	0	0	0	0	0	293	0	0	0	0	0	0
A_ASV00630	Archaea	Crenarchaeota	Bathyarchaeia	Un_Bathyarchaeia	Un_Bathyarchaeia	Un_Bathyarchaeia	Un_Bathyarchaeia		0	0	0	0	0	0	71	0	0	0	0	0	0	77	0	48	70	0	0	0	0	0	0	0	0	0	0	0	0	0	0	0	0	0	0	0	0	0	0	25	0
A_ASV00631	Archaea	Crenarchaeota	Bathyarchaeia	Un_Bathyarchaeia	Un_Bathyarchaeia	Un_Bathyarchaeia	Un_Bathyarchaeia		0	0	0	0	0	0	0	0	0	0	0	0	0	0	0	0	0	0	0	0	0	0	0	0	0	0	291	0	0	0	0	0	0	0	0	0	0	0	0	0	0
A_ASV00632	Archaea	Crenarchaeota	Bathyarchaeia	Un_Bathyarchaeia	Un_Bathyarchaeia	Un_Bathyarchaeia	Un_Bathyarchaeia		0	0	0	0	0	0	0	0	0	0	0	0	0	0	0	0	0	0	0	0	0	0	0	0	0	0	0	70	0	0	58	0	0	163	0	0	0	0	0	0	0
A_ASV00634	Archaea	Crenarchaeota	Bathyarchaeia	Un_Bathyarchaeia	Un_Bathyarchaeia	Un_Bathyarchaeia	Un_Bathyarchaeia		0	0	0	0	0	0	0	0	0	0	0	0	0	0	0	0	0	0	0	0	0	0	0	0	0	0	290	0	0	0	0	0	0	0	0	0	0	0	0	0	0
A_ASV00633	Archaea	Nanoarchaeota	Nanoarchaeia	Woesearchaeales	Un_Woesearchaeales	Un_Woesearchaeales	Un_Woesearchaeales		0	0	0	0	0	0	0	0	0	0	24	38	0	35	0	0	0	23	0	0	0	0	0	0	0	0	0	0	0	0	0	0	0	170	0	0	0	0	0	0	0
A_ASV00638	Archaea	Crenarchaeota	Bathyarchaeia	Un_Bathyarchaeia	Un_Bathyarchaeia	Un_Bathyarchaeia	Un_Bathyarchaeia		0	0	0	0	0	0	0	0	0	0	0	0	44	36	37	0	0	0	0	0	0	0	0	0	0	0	0	0	59	0	40	0	0	72	0	0	0	0	0	0	0
A_ASV00636	Archaea	Thermoplasmatota	Thermoplasmata	Marine Benthic Group D and DHVEG-1	Un_Marine Benthic Group D and DHVEG-1	Un_Marine Benthic Group D and DHVEG-1	Un_Marine Benthic Group D and DHVEG-1		0	0	0	0	0	0	26	39	94	0	0	0	0	0	0	0	0	0	0	0	0	0	0	0	0	0	0	0	0	0	0	0	0	0	0	0	0	0	0	0	0
A_ASV00640	Archaea	Crenarchaeota	Bathyarchaeia	Un_Bathyarchaeia	Un_Bathyarchaeia	Un_Bathyarchaeia	Un_Bathyarchaeia		0	0	0	0	0	0	0	0	0	0	0	0	0	0	0	0	0	0	0	0	0	0	0	287	0	0	0	0	0	0	0	0	0	0	0	0	0	0	0	0	0
A_ASV00641	Archaea	Crenarchaeota	Bathyarchaeia	Un_Bathyarchaeia	Un_Bathyarchaeia	Un_Bathyarchaeia	Un_Bathyarchaeia		0	0	0	0	0	0	0	0	0	0	0	0	0	0	0	0	0	0	0	0	0	0	0	0	0	0	0	0	0	0	0	0	0	0	225	62	0	0	0	0	0
A_ASV00639	Archaea	Nanoarchaeota	Nanoarchaeia	Woesearchaeales	Un_Woesearchaeales	Un_Woesearchaeales	Un_Woesearchaeales		0	0	0	0	276	0	11	0	0	0	0	0	0	0	0	0	0	0	0	0	0	0	0	0	0	0	0	0	0	0	0	0	0	0	0	0	0	0	0	0	0
A_ASV00642	Archaea	Crenarchaeota	Bathyarchaeia	Un_Bathyarchaeia	Un_Bathyarchaeia	Un_Bathyarchaeia	Un_Bathyarchaeia		0	0	0	0	0	0	0	0	0	0	0	0	0	0	0	0	0	0	0	286	0	0	0	0	0	0	0	0	0	0	0	0	0	0	0	0	0	0	0	0	0
A_ASV00643	Archaea	Crenarchaeota	Bathyarchaeia	Un_Bathyarchaeia	Un_Bathyarchaeia	Un_Bathyarchaeia	Un_Bathyarchaeia		0	0	0	0	0	0	31	24	0	0	0	0	0	0	0	0	0	0	0	0	0	0	0	0	0	0	0	0	0	0	0	0	0	0	0	209	0	0	0	0	0
A_ASV00644	Archaea	Hydrothermarchaeota	Hydrothermarchaeia	Hydrothermarchaeales	Un_Hydrothermarchaeales	Un_Hydrothermarchaeales	Un_Hydrothermarchaeales		0	0	0	0	0	0	0	0	0	0	0	0	0	0	0	0	0	0	0	0	0	0	0	0	0	0	0	0	0	0	0	0	0	0	0	0	0	0	0	0	0
A_ASV00646	Archaea	Crenarchaeota	Bathyarchaeia	Un_Bathyarchaeia	Un_Bathyarchaeia	Un_Bathyarchaeia	Un_Bathyarchaeia		0	0	0	0	0	0	0	0	0	0	0	0	0	0	0	0	0	0	0	0	0	0	0	0	0	0	0	72	0	0	0	0	0	212	0	0	0	0	0	0	0
A_ASV00645	Archaea	Thermoplasmatota	Thermoplasmata	Un_Thermoplasmata	Un_Thermoplasmata	Un_Thermoplasmata	Un_Thermoplasmata		0	0	0	0	0	0	0	0	0	0	60	54	0	0	170	0	0	0	0	0	0	0	0	0	0	0	0	0	0	0	0	0	0	0	0	0	0	0	0	0	0
A_ASV00647	Archaea	Crenarchaeota	Bathyarchaeia	Un_Bathyarchaeia	Un_Bathyarchaeia	Un_Bathyarchaeia	Un_Bathyarchaeia		0	0	0	0	0	0	0	0	0	0	0	0	0	0	0	0	0	0	0	0	0	0	0	0	0	0	0	0	0	0	0	0	0	0	283	0	0	0	0	0	0
A_ASV00648	Archaea	Crenarchaeota	Bathyarchaeia	Un_Bathyarchaeia	Un_Bathyarchaeia	Un_Bathyarchaeia	Un_Bathyarchaeia		0	24	0	0	0	0	0	0	0	0	0	0	0	0	54	0	39	0	0	0	0	0	0	0	0	0	0	0	0	0	0	0	0	0	0	68	0	0	0	0	0
A_ASV00650	Archaea	Crenarchaeota	Bathyarchaeia	Un_Bathyarchaeia	Un_Bathyarchaeia	Un_Bathyarchaeia	Un_Bathyarchaeia		0	0	0	0	0	0	0	0	0	0	0	0	0	0	0	0	0	0	0	0	0	0	0	0	0	281	0	0	0	0	0	0	0	0	0	0	0	0	0	0	0
A_ASV00651	Archaea	Crenarchaeota	Bathyarchaeia	Un_Bathyarchaeia	Un_Bathyarchaeia	Un_Bathyarchaeia	Un_Bathyarchaeia		0	0	0	0	0	0	0	0	0	0	0	0	0	0	0	0	0	0	0	0	0	0	279	0	0	0	0	0	0	0	0	0	0	0	0	0	0	0	0	0	0
A_ASV00653	Archaea	Nanoarchaeota	Nanoarchaeia	Woesearchaeales	GW2011_GWC1_47_15	Un_GW2011_GWC1_47_15	Un_GW2011_GWC1_47_15		0	0	0	0	29	0	0	0	0	0	22	0	41	23	43	39	28	14	0	0	0	0	0	0	0	0	0	0	0	22	0	0	16	0	0	0	0	0	0	0	0
A_ASV00656	Archaea	Crenarchaeota	Bathyarchaeia	Un_Bathyarchaeia	Un_Bathyarchaeia	Un_Bathyarchaeia	Un_Bathyarchaeia		0	0	0	0	0	0	0	0	0	0	0	0	0	0	0	0	0	0	0	0	0	0	0	0	0	0	0	0	0	0	0	0	0	0	276	0	0	0	0	0	0
A_ASV00657	Archaea	Crenarchaeota	Bathyarchaeia	Un_Bathyarchaeia	Un_Bathyarchaeia	Un_Bathyarchaeia	Un_Bathyarchaeia		0	0	0	0	0	0	0	0	0	0	0	0	0	0	0	0	0	0	0	0	0	0	0	0	0	0	0	0	0	0	0	0	0	0	276	0	0	0	0	0	0
A_ASV00655	Archaea	Un_Archaea	Un_Archaea	Un_Archaea	Un_Archaea	Un_Archaea	Un_Archaea		0	0	33	0	0	38	0	0	0	0	0	0	0	0	0	0	0	0	0	0	0	0	0	0	0	0	0	0	0	0	21	0	0	0	0	184	0	0	0	0	0
A_ASV00660	Archaea	Crenarchaeota	Bathyarchaeia	Un_Bathyarchaeia	Un_Bathyarchaeia	Un_Bathyarchaeia	Un_Bathyarchaeia		0	10	0	0	29	21	19	0	0	51	0	16	11	29	15	0	0	16	0	0	0	0	0	0	0	0	0	0	26	19	0	0	0	0	0	0	5	0	8	0	0
A_ASV00661	Archaea	Crenarchaeota	Bathyarchaeia	Un_Bathyarchaeia	Un_Bathyarchaeia	Un_Bathyarchaeia	Un_Bathyarchaeia		0	0	0	0	0	0	0	0	0	0	0	0	0	0	0	0	0	0	0	0	0	0	0	0	0	0	0	0	0	0	97	0	0	0	177	0	0	0	0	0	0
A_ASV00662	Archaea	Crenarchaeota	Bathyarchaeia	Un_Bathyarchaeia	Un_Bathyarchaeia	Un_Bathyarchaeia	Un_Bathyarchaeia		0	0	0	0	0	0	0	48	0	0	0	0	36	0	19	0	0	0	0	0	0	0	0	0	0	0	0	0	0	0	16	0	0	68	0	0	0	0	0	0	0
A_ASV00663	Archaea	Crenarchaeota	Bathyarchaeia	Un_Bathyarchaeia	Un_Bathyarchaeia	Un_Bathyarchaeia	Un_Bathyarchaeia		0	0	0	0	0	0	0	0	0	0	0	0	0	0	0	0	0	0	0	0	0	0	0	0	0	0	0	0	0	0	0	0	0	0	0	272	0	0	0	0	0
A_ASV00665	Archaea	Thermoplasmatota	Thermoplasmata	Marine Benthic Group D and DHVEG-1	Un_Marine Benthic Group D and DHVEG-1	Un_Marine Benthic Group D and DHVEG-1	Un_Marine Benthic Group D and DHVEG-1		0	0	0	0	0	0	0	0	0	0	0	0	0	0	0	0	0	0	0	0	0	0	0	0	0	0	0	0	0	0	130	67	74	0	0	0	0	0	0	0	0
A_ASV00666	Archaea	Crenarchaeota	Bathyarchaeia	Un_Bathyarchaeia	Un_Bathyarchaeia	Un_Bathyarchaeia	Un_Bathyarchaeia		13	0	0	0	0	0	68	0	49	24	0	0	0	0	0	0	0	0	0	0	0	0	0	0	0	0	0	0	0	0	0	0	0	0	0	0	0	0	0	45	0
A_ASV00668	Archaea	Crenarchaeota	Bathyarchaeia	Un_Bathyarchaeia	Un_Bathyarchaeia	Un_Bathyarchaeia	Un_Bathyarchaeia		0	0	0	0	0	0	0	0	0	0	0	0	0	0	0	0	0	0	0	0	0	0	0	0	268	0	0	0	0	0	0	0	0	0	0	0	0	0	0	0	0
A_ASV00669	Archaea	Thermoplasmatota	Thermoplasmata	Marine Benthic Group D and DHVEG-1	Un_Marine Benthic Group D and DHVEG-1	Un_Marine Benthic Group D and DHVEG-1	Un_Marine Benthic Group D and DHVEG-1		0	0	0	0	0	0	0	0	0	0	0	0	0	0	0	0	0	0	0	0	0	0	0	0	0	0	0	0	0	0	71	0	95	102	0	0	0	0	0	0	0
A_ASV00673	Archaea	Crenarchaeota	Bathyarchaeia	Un_Bathyarchaeia	Un_Bathyarchaeia	Un_Bathyarchaeia	Un_Bathyarchaeia		0	0	0	0	0	0	0	0	0	0	0	0	0	0	0	0	0	0	0	0	0	0	0	0	0	0	0	0	0	0	0	0	0	84	0	0	0	0	0	0	0
A_ASV00675	Archaea	Aenigmarchaeota	Un_Aenigmarchaeota	Un_Aenigmarchaeota	Un_Aenigmarchaeota	Un_Aenigmarchaeota	Un_Aenigmarchaeota		49	48	26	0	0	0	0	0	0	0	0	0	0	0	0	0	0	0	0	0	0	0	0	0	0	0	0	0	0	0	0	0	0	0	0	0	27	52	63	0	0
A_ASV00676	Archaea	Crenarchaeota	Bathyarchaeia	Un_Bathyarchaeia	Un_Bathyarchaeia	Un_Bathyarchaeia	Un_Bathyarchaeia		0	40	0	7	22	0	21	0	43	13	0	0	17	0	0	0	0	0	0	0	0	0	0	0	0	0	0	20	0	0	0	20	0	0	0	0	0	0	0	0	0
A_ASV00677	Archaea	Nanoarchaeota	Nanoarchaeia	Woesearchaeales	Un_Woesearchaeales	Un_Woesearchaeales	Un_Woesearchaeales		0	0	0	0	0	0	0	0	0	0	22	28	36	62	31	0	0	23	0	0	0	0	0	0	0	0	0	20	0	0	19	24	0	0	0	0	0	0	0	0	0
A_ASV00680	Archaea	Crenarchaeota	Bathyarchaeia	Un_Bathyarchaeia	Un_Bathyarchaeia	Un_Bathyarchaeia	Un_Bathyarchaeia		0	0	0	0	0	0	0	0	0	0	0	0	0	0	0	0	0	0	0	0	0	0	0	264	0	0	0	0	0	0	0	0	0	0	0	0	0	0	0	0	0
A_ASV00681	Archaea	Crenarchaeota	Bathyarchaeia	Un_Bathyarchaeia	Un_Bathyarchaeia	Un_Bathyarchaeia	Un_Bathyarchaeia		0	0	0	0	0	0	0	0	0	0	0	0	0	0	0	0	0	0	0	0	0	0	0	0	0	0	0	58	45	0	4	79	0	2	2	74	0	0	0	0	0
A_ASV00679	Archaea	Halobacterota	Methanocellia	Methanocellales	Methanocellaceae	Methanocella	paludicola		0	0	0	0	0	0	0	0	0	0	0	0	0	0	0	2	0	0	0	0	0	0	0	0	0	0	0	53	0	66	85	58	0	0	0	0	0	0	0	0	0
A_ASV00678	Archaea	Thermoplasmatota	Thermoplasmata	Un_Thermoplasmata	Un_Thermoplasmata	Un_Thermoplasmata	Un_Thermoplasmata		0	0	0	0	0	0	61	0	0	0	0	46	0	28	0	0	0	0	0	0	0	0	0	0	0	103	0	26	0	0	0	0	0	0	0	0	0	0	0	0	0
A_ASV00682	Archaea	Crenarchaeota	Bathyarchaeia	Un_Bathyarchaeia	Un_Bathyarchaeia	Un_Bathyarchaeia	Un_Bathyarchaeia		57	18	29	0	0	0	0	0	58	0	0	0	0	0	0	21	0	0	0	0	0	0	0	0	0	0	0	0	0	0	0	0	0	80	0	0	0	0	0	0	0
A_ASV00687	Archaea	Nanoarchaeota	Nanoarchaeia	Woesearchaeales	Un_Woesearchaeales	Un_Woesearchaeales	Un_Woesearchaeales		0	0	0	0	0	0	0	0	0	0	0	0	0	0	0	0	0	0	0	0	0	0	0	0	0	0	0	0	0	0	0	0	0	0	261	0	0	0	0	0	0
A_ASV00686	Archaea	Thermoplasmatota	Thermoplasmata	Marine Benthic Group D and DHVEG-1	Un_Marine Benthic Group D and DHVEG-1	Un_Marine Benthic Group D and DHVEG-1	Un_Marine Benthic Group D and DHVEG-1		0	0	0	0	0	0	0	28	0	0	0	0	0	22	36	41	62	30	0	0	0	0	0	0	0	0	0	0	0	0	42	0	0	0	0	0	0	0	0	0	0
A_ASV00688	Archaea	Thermoplasmatota	Thermoplasmata	Marine Benthic Group D and DHVEG-1	Un_Marine Benthic Group D and DHVEG-1	Un_Marine Benthic Group D and DHVEG-1	Un_Marine Benthic Group D and DHVEG-1		0	0	0	0	0	0	0	0	0	0	0	0	0	0	0	0	0	0	0	0	0	0	0	0	0	0	0	0	0	0	0	0	0	0	0	261	0	0	0	0	0
A_ASV00689	Archaea	Crenarchaeota	Bathyarchaeia	Un_Bathyarchaeia	Un_Bathyarchaeia	Un_Bathyarchaeia	Un_Bathyarchaeia		0	0	0	0	0	0	0	0	0	0	0	0	0	0	0	0	0	0	0	0	0	0	0	0	0	260	0	0	0	0	0	0	0	0	0	0	0	0	0	0	0
A_ASV00692	Archaea	Crenarchaeota	Bathyarchaeia	Un_Bathyarchaeia	Un_Bathyarchaeia	Un_Bathyarchaeia	Un_Bathyarchaeia		0	0	0	0	0	0	0	0	0	0	0	0	0	0	0	0	0	0	0	0	0	0	0	0	0	0	0	0	0	0	0	0	0	260	0	0	0	0	0	0	0
A_ASV00693	Archaea	Crenarchaeota	Bathyarchaeia	Un_Bathyarchaeia	Un_Bathyarchaeia	Un_Bathyarchaeia	Un_Bathyarchaeia		0	0	0	0	0	0	0	0	0	0	0	0	0	0	0	0	0	0	0	0	0	0	0	0	0	0	0	0	0	0	0	0	0	0	260	0	0	0	0	0	0
A_ASV00694	Archaea	Crenarchaeota	Bathyarchaeia	Un_Bathyarchaeia	Un_Bathyarchaeia	Un_Bathyarchaeia	Un_Bathyarchaeia		0	0	0	0	0	0	0	0	0	0	0	0	0	0	0	0	0	0	0	0	0	0	0	0	0	0	0	0	0	0	0	0	0	0	260	0	0	0	0	0	0
A_ASV00690	Archaea	Halobacterota	Methanosarcinia	Methanosarciniales	Methanosarcinaceae	Methanosarcina	Un_Methanosarcina		0	0	0	0	0	0	0	0	0	0	0	0	0	0	0	0	0	0	0	0	0	0	0	0	0	0	260	0	0	0	0	0	0	0	0	0	0	0	0	0	0
A_ASV00696	Archaea	Crenarchaeota	Bathyarchaeia	Un_Bathyarchaeia	Un_Bathyarchaeia	Un_Bathyarchaeia	Un_Bathyarchaeia		0	0	0	0	0	0	0	0	0	0	0	0	0	0	0	0	0	0	0	0	0	0	0	259	0	0	0	0	0	0	0	0	0	0	0	0	0	0	0	0	0
A_ASV00695	Archaea	Thermoplasmatota	Thermoplasmata	Marine Benthic Group D and DHVEG-1	Un_Marine Benthic Group D and DHVEG-1	Un_Marine Benthic Group D and DHVEG-1	Un_Marine Benthic Group D and DHVEG-1		0	0	0	0	0	0	0	0	0	0	0	0	0	0	0	0	0	0	46	0	0	0	0	0	0	0	0	0	0	0	77	0	0	136	0	0	0	0	0	0	0
A_ASV00697	Archaea	Crenarchaeota	Bathyarchaeia	Un_Bathyarchaeia	Un_Bathyarchaeia	Un_Bathyarchaeia	Un_Bathyarchaeia		19	0	0	0	0	0	0	0	0	0	0	20	0	0	0	0	0	0	0	0	0	0	0	0	0	0	0	0	0	39	0	0	0	0	0	0	0	0	0	180	0
A_ASV00698	Archaea	Crenarchaeota	Bathyarchaeia	Un_Bathyarchaeia	Un_Bathyarchaeia	Un_Bathyarchaeia	Un_Bathyarchaeia		4	0	0	0	0	0	0	3	23	60	0	0	0	0	0	0	0	0	0	0	0	0	0	0	0	0	0	0	0	0	0	0	0	24	2	0	0	0	0	0	0
A_ASV00700	Archaea	Crenarchaeota	Bathyarchaeia	Un_Bathyarchaeia	Un_Bathyarchaeia	Un_Bathyarchaeia	Un_Bathyarchaeia		0	0	0	0	0	0	0	0	0	0	0	0	0	0	21	0	0	0	0	0	0	0	0	0	0	0	0	0	0	0	0	0	0	35	0	202	0	0	0	0	0
A_ASV00701	Archaea	Crenarchaeota	Bathyarchaeia	Un_Bathyarchaeia	Un_Bathyarchaeia	Un_Bathyarchaeia	Un_Bathyarchaeia		0	0	0	0	0	0	0	0	0	0	0	0	0	0	0	0	0	0	0	0	0	0	0	258	0	0	0	0	0	0	0	0	0	0	0	0	0	0	0	0	0
A_ASV00702	Archaea	Crenarchaeota	Bathyarchaeia	Un_Bathyarchaeia	Un_Bathyarchaeia	Un_Bathyarchaeia	Un_Bathyarchaeia		0	0	0	0	0	0	0	0	0	0	0	0	0	0	0	0	0	0	0	0	0	0	0	0	0	0	257	0	0	0	0	0	0	0	0	0	0	0	0	0	0
A_ASV00709	Archaea	Crenarchaeota	Bathyarchaeia	Un_Bathyarchaeia	Un_Bathyarchaeia	Un_Bathyarchaeia	Un_Bathyarchaeia		0	0	0	0	0	0	30	46	0	0	0	0	0	0	0	0	0	0	0	0	0	0	0	0	0	0	0	22	0	0	0	0	29	0	0	126	0	0	0	0	0
A_ASV00708	Archaea	Un_Archaea	Un_Archaea	Un_Archaea	Un_Archaea	Un_Archaea	Un_Archaea		0	0	0	0	0	0	60	0	0	0	0	0	0	27	0	0	0	0	0	0	0	0	0	0	0	0	0	0	0	0	0	0	29	101	0	36	0	0	0	0	0
A_ASV00713	Archaea	Crenarchaeota	Nitrososphaeria	Nitrosopumilales	Nitrosopumilaceae	Candidatus Nitrosopumilus	Un_Candidatus Nitrosopumilus		0	0	0	0	0	0	0	0	0	0	0	0	0	0	0	0	0	0	0	0	0	0	0	0	0	0	0	0	0	0	0	0	0	0	0	251	0	0	0	0	0
A_ASV00711	Archaea	Thermoplasmatota	Thermoplasmata	Marine Benthic Group D and DHVEG-1	Un_Marine Benthic Group D and DHVEG-1	Un_Marine Benthic Group D and DHVEG-1	Un_Marine Benthic Group D and DHVEG-1		0	0	0	0	0	0	65	0	0	0	0	0	0	0	0	0	0	0	0	0	0	0	0	0	0	0	0	0	0	30	108	0	48	0	0	0	0	0	0	0	0
A_ASV00718	Archaea	Crenarchaeota	Bathyarchaeia	Un_Bathyarchaeia	Un_Bathyarchaeia	Un_Bathyarchaeia	Un_Bathyarchaeia		0	0	0	0	0	0	0	0	0	0	0	0	0	0	0	0	0	0	0	0	0	0	0	0	0	0	248	0	0	0	0	0	0	0	0	0	0	0	0	0	0
A_ASV00720	Archaea	Un_Archaea	Un_Archaea	Un_Archaea	Un_Archaea	Un_Archaea	Un_Archaea		0	0	0	0	0	0	0	0	0	0	0	0	0	0	0	0	0	0	0	0	0	0	0	0	247	0	0	0	0	0	0	0	0	0	0	0	0	0	0	0	0
A_ASV00723	Archaea	Crenarchaeota	Nitrososphaeria	Nitrosopumilales	Nitrosopumilaceae	Candidatus Nitrosopumilus	Un_Candidatus Nitrosopumilus		0	0	0	0	0	0	0	0	0	0	0	0	0	0	0	0	0	0	0	0	0	0	0	0	0	0	0	0	0	0	0	0	0	0	0	246	0	0	0	0	0
A_ASV00722	Archaea	Hydrothermarchaeota	Hydrothermarchaeia	Hydrothermarchaeales	Un_Hydrothermarchaeales	Un_Hydrothermarchaeales	Un_Hydrothermarchaeales		59	0	0	0	0	0	38	0	0	0	0	0	0	0	0	0	0	0	0	0	0	0	0	0	0	0	0	0	0	0	0	0	0	0	0	0	0	0	95	0	54
A_ASV00725	Archaea	Crenarchaeota	Bathyarchaeia	Un_Bathyarchaeia	Un_Bathyarchaeia	Un_Bathyarchaeia	Un_Bathyarchaeia		0	0	0	0	0	0	0	0	0	0	0	0	0	0	0	0	0	0	0	0	0	0	0	0	245	0	0	0	0	0	0	0	0	0	0	0	0	0	0	0	0
A_ASV00729	Archaea	Un_Archaea	Un_Archaea	Un_Archaea	Un_Archaea	Un_Archaea	Un_Archaea		0	0	0	0	0	0	0	0	0	0	0	0	0	0	0	0	0	0	0	0	0	0	0	0	0	0	0	8	0	0	0	0	0	0	0	236	0	0	0	0	0
A_ASV00730	Archaea	Crenarchaeota	Bathyarchaeia	Un_Bathyarchaeia	Un_Bathyarchaeia	Un_Bathyarchaeia	Un_Bathyarchaeia		0	0	0	0	0	0	0	80	0	0	0	0	0	0	0	0	0	0	0	0	0	0	0	0	0	0	20	0	0	0	0	0	0	0	0	0	31	0	0	0	74
A_ASV00731	Archaea	Crenarchaeota	Bathyarchaeia	Un_Bathyarchaeia	Un_Bathyarchaeia	Un_Bathyarchaeia	Un_Bathyarchaeia		0	0	0	0	0	0	0	41	13	0	0	19	24	25	0	0	27	0	0	0	0	0	0	0	0	0	0	0	0	0	0	0	0	0	0	0	0	0	0	0	0
A_ASV00736	Archaea	Asgardarchaeota	Lokiarchaeia	Lokiarchaeia	Lokiarchaeia	Lokiarchaeia	Lokiarchaeia		0	0	0	0	0	0	0	0	0	0	0	0	0	0	0	0	0	0	0	0	0	0	0	0	0	0	0	0	0	0	0	0	0	0	241	0	0	0	0	0	0
A_ASV00735	Archaea	Thermoplasmatota	Thermoplasmata	Marine Benthic Group D and DHVEG-1	Un_Marine Benthic Group D and DHVEG-1	Un_Marine Benthic Group D and DHVEG-1	Un_Marine Benthic Group D and DHVEG-1		0	0	0	0	0	0	0	0	37	0	0	0	52	38	0	0	0	0	0	0	0	0	0	0	0	0	0	0	0	0	0	0	0	0	0	114	0	0	0	0	0
A_ASV00739	Archaea	Asgardarchaeota	Odinarchaeia	Un_Odinarchaeia	Un_Odinarchaeia	Un_Odinarchaeia	Un_Odinarchaeia		0	0	0	0	0	0	0	0	0	0	0	0	0	0	0	0	0	0	0	0	0	0	0	0	0	0	0	19	38	0	0	0	51	132	0	0	0	0	0	0	0
A_ASV00738	Archaea	Crenarchaeota	Bathyarchaeia	Un_Bathyarchaeia	Un_Bathyarchaeia	Un_Bathyarchaeia	Un_Bathyarchaeia		0	0	0	0	0	0	0	0	0	0	0	0	0	0	0	0	0	0	0	0	0	0	0	240	0	0	0	0	0	0	0	0	0	0	0	0	0	0	0	0	0
A_ASV00740	Archaea	Crenarchaeota	Bathyarchaeia	Un_Bathyarchaeia	Un_Bathyarchaeia	Un_Bathyarchaeia	Un_Bathyarchaeia		0	0	0	0	0	0	0	0	0	0	0	0	0	0	0	0	0	0	0	0	0	0	0	0	0	0	0	0	0	0	0	0	0	0	0	240	0	0	0	0	0
A_ASV00741	Archaea	Crenarchaeota	Bathyarchaeia	Un_Bathyarchaeia	Un_Bathyarchaeia	Un_Bathyarchaeia	Un_Bathyarchaeia		0	0	0	0	0	0	0	0	0	0	0	0	0	0	0	0	0	0	0	0	0	0	0	0	0	0	0	0	0	0	0	0	0	0	0	240	0	0	0	0	0
A_ASV00737	Archaea	Crenarchaeota	Bathyarchaeia	Un_Bathyarchaeia	Un_Bathyarchaeia	Un_Bathyarchaeia	Un_Bathyarchaeia		0	0	26	0	0	0	0	0	0	0	0	0	0	0	0	0	0	0	0	0	0	0	0	0	0	0	0	0	0	0	0	0	0	0	0	214	0	0	0	0	0
A_ASV00743	Archaea	Thermoplasmatota	Thermoplasmata	Marine Benthic Group D and DHVEG-1	Un_Marine Benthic Group D and DHVEG-1	Un_Marine Benthic Group D and DHVEG-1	Un_Marine Benthic Group D and DHVEG-1		0	0	0	0	0	0	0	0	0	0	0	0	0	0	0	0	0	0	0	0	0	0	0	0	0	239	0	0	0	0	0	0	0	0	0	0	0	0	0	0	0
A_ASV00744	Archaea	Nanoarchaeota	Nanoarchaeia	Woesearchaeales	Un_Woesearchaeales	Un_Woesearchaeales	Un_Woesearchaeales		9	0	20	10	24	0	0	0	0	0	0	23	50	28	35	21	0	18	0	0	0	0	0	0	0	0	0	0	0	0	0	0	0	0	0	0	0	0	0	0	0
A_ASV00747	Archaea	Crenarchaeota	Bathyarchaeia	Un_Bathyarchaeia	Un_Bathyarchaeia	Un_Bathyarchaeia	Un_Bathyarchaeia		0	0	0	0	0	0	0	0	0	0	0	0	0	0	0	0	0	0	0	0	0	0	0	0	237	0	0	0	0	0	0	0	0	0	0	0	0	0	0	0	0
A_ASV00746	Archaea	Un_Archaea	Un_Archaea	Un_Archaea	Un_Archaea	Un_Archaea	Un_Archaea		0	0	0	0	0	0	0	0	0	0	0	33	0	0	0	0	0	0	0	0	0	0	0	0	0	0	0	0	0	0	0	83	0	0	92	0	0	0	0	0	0
A_ASV00745	Archaea	Thermoplasmatota	Thermoplasmata	Marine Benthic Group D and DHVEG-1	Un_Marine Benthic Group D and DHVEG-1	Un_Marine Benthic Group D and DHVEG-1	Un_Marine Benthic Group D and DHVEG-1		0	0	0	0	0	0	0	0	65	0	0	0	0	0	0	0	0	0	0	0	0	0	0	0	0	0	0	0	0	0	0	0	0	0	0	0	0	0	0	0	0
A_ASV00748	Archaea	Asgardarchaeota	Lokiarchaeia	Lokiarchaeia	Lokiarchaeia	Lokiarchaeia	Lokiarchaeia		0	0	0	0	0	0	0	0	0	0	0	0	0	0	0	0	0	0	0	0	0	0	0	0	0	0	0	0	0	0	0	0	0	175	0	0	0	0	0	0	0
A_ASV00751	Archaea	Crenarchaeota	Bathyarchaeia	Un_Bathyarchaeia	Un_Bathyarchaeia	Un_Bathyarchaeia	Un_Bathyarchaeia		0	0	0	0	0	0	0	0	0	0	0	0	0	0	0	0	0	16	0	0	0	0	0	0	0	164	0	0	0	0	0	0	0	0	0	55	0	0	0	0	0
A_ASV00752	Archaea	Crenarchaeota	Bathyarchaeia	Un_Bathyarchaeia	Un_Bathyarchaeia	Un_Bathyarchaeia	Un_Bathyarchaeia		0	0	0	0	0	0	0	0	0	0	0	0	0	0	0	0	0	0	0	0	0	0	0	0	0	235	0	0	0	0	0	0	0	0	0	0	0	0	0	0	0
A_ASV00750	Archaea	Crenarchaeota	Nitrososphaeria	Marine Benthic Group A	Un_Marine Benthic Group A	Un_Marine Benthic Group A	Un_Marine Benthic Group A		0	10	0	0	0	0	0	0	0	0	0	0	0	0	0	0	0	0	0	0	0	0	0	0	0	0	0	0	0	0	0	0	0	0	0	0	12	0	16	110	0
A_ASV00753	Archaea	Thermoplasmatota	Thermoplasmata	Marine Benthic Group D and DHVEG-1	Un_Marine Benthic Group D and DHVEG-1	Un_Marine Benthic Group D and DHVEG-1	Un_Marine Benthic Group D and DHVEG-1		0	0	0	0	0	0	0	0	0	0	0	0	0	0	0	0	0	0	0	0	0	0	0	0	0	0	0	0	0	0	0	0	0	0	0	0	0	0	0	0	39
A_ASV00756	Archaea	Crenarchaeota	Bathyarchaeia	Un_Bathyarchaeia	Un_Bathyarchaeia	Un_Bathyarchaeia	Un_Bathyarchaeia		0	0	0	0	0	0	0	0	0	0	0	0	0	0	0	0	0	0	0	0	0	0	0	0	0	0	0	0	0	0	0	0	0	0	234	0	0	0	0	0	0
A_ASV00758	Archaea	Thermoplasmatota	Thermoplasmata	Marine Benthic Group D and DHVEG-1	Un_Marine Benthic Group D and DHVEG-1	Un_Marine Benthic Group D and DHVEG-1	Un_Marine Benthic Group D and DHVEG-1		0	0	0	0	0	0	0	0	0	0	0	0	0	0	0	0	0	0	0	0	0	0	0	0	0	0	0	0	0	0	0	0	0	0	233	0	0	0	0	0	0
A_ASV00761	Archaea	Altiarchaeota	Altiarchaeia	Altiarchaeales	Altiarchaeaceae	Candidatus Altiarchaeum	Un_Candidatus Altiarchaeum		19	0	21	0	0	0	0	0	0	0	47	17	0	59	44	13	0	12	0	0	0	0	0	0	0	0	0	0	0	0	0	0	0	0	0	0	0	0	0	0	0
A_ASV00762	Archaea	Thermoplasmatota	Thermoplasmata	Marine Benthic Group D and DHVEG-1	Un_Marine Benthic Group D and DHVEG-1	Un_Marine Benthic Group D and DHVEG-1	Un_Marine Benthic Group D and DHVEG-1		0	0	0	0	0	0	25	0	96	0	0	0	0	0	0	0	0	0	0	0	0	0	0	0	0	0	0	0	0	0	0	0	0	0	0	0	0	0	0	0	0
A_ASV00764	Archaea	Thermoplasmatota	Thermoplasmata	Un_Thermoplasmata	Un_Thermoplasmata	Un_Thermoplasmata	Un_Thermoplasmata		0	0	0	0	8	0	0	0	0	0	0	19	45	0	25	24	35	0	0	0	0	0	0	0	0	0	0	0	0	30	21	0	24	0	0	0	0	0	0	0	0
A_ASV00769	Archaea	Halobacterota	Methanomicrobia	Methanomicrobiales	Methanomicrobiaceae	Methanogenium	Un_Methanogenium		0	0	0	0	0	0	0	0	0	0	0	0	0	0	0	0	0	0	0	0	0	0	0	0	0	0	0	0	0	0	0	0	0	0	0	230	0	0	0	0	0
A_ASV00767	Archaea	Hydrothermarchaeota	Hydrothermarchaeia	Hydrothermarchaeales	Un_Hydrothermarchaeales	Un_Hydrothermarchaeales	Un_Hydrothermarchaeales		0	93	0	0	0	0	0	0	0	0	0	0	0	0	0	0	0	0	0	0	0	0	0	0	0	0	0	0	0	0	0	0	0	0	0	0	77	0	0	0	0
A_ASV00768	Archaea	Un_Archaea	Un_Archaea	Un_Archaea	Un_Archaea	Un_Archaea	Un_Archaea		0	0	0	0	0	0	0	75	28	0	0	26	28	34	0	0	0	14	0	0	0	0	0	0	0	0	0	0	0	0	0	0	0	0	0	0	25	0	0	0	0
A_ASV00771	Archaea	Nanoarchaeota	Nanoarchaeia	Woesearchaeales	Un_Woesearchaeales	Un_Woesearchaeales	Un_Woesearchaeales		0	0	0	0	0	0	0	0	0	0	28	27	25	64	0	0	27	0	0	0	0	0	0	0	0	0	0	33	25	0	0	0	0	0	0	0	0	0	0	0	0
A_ASV00775	Archaea	Crenarchaeota	Bathyarchaeia	Un_Bathyarchaeia	Un_Bathyarchaeia	Un_Bathyarchaeia	Un_Bathyarchaeia		0	0	0	0	0	0	0	0	0	0	0	0	0	0	0	0	0	0	0	0	0	0	0	0	0	0	0	0	0	0	0	0	0	0	0	0	0	0	0	70	0
A_ASV00773	Archaea	Nanoarchaeota	Nanoarchaeia	Woesearchaeales	Un_Woesearchaeales	Un_Woesearchaeales	Un_Woesearchaeales		0	0	0	0	51	29	0	0	0	0	0	0	0	0	57	91	0	0	0	0	0	0	0	0	0	0	0	0	0	0	0	0	0	0	0	0	0	0	0	0	0
A_ASV00777	Archaea	Crenarchaeota	Bathyarchaeia	Un_Bathyarchaeia	Un_Bathyarchaeia	Un_Bathyarchaeia	Un_Bathyarchaeia		0	0	0	0	70	0	115	0	0	0	0	0	0	0	0	0	0	0	0	0	0	0	0	0	0	0	0	0	0	42	0	0	0	0	0	0	0	0	0	0	0
A_ASV00780	Archaea	Crenarchaeota	Bathyarchaeia	Un_Bathyarchaeia	Un_Bathyarchaeia	Un_Bathyarchaeia	Un_Bathyarchaeia		0	0	0	0	0	0	0	0	0	0	0	0	0	0	0	0	0	0	0	0	0	0	0	0	0	0	0	0	0	0	0	23	0	0	0	192	0	0	0	0	0
A_ASV00781	Archaea	Crenarchaeota	Bathyarchaeia	Un_Bathyarchaeia	Un_Bathyarchaeia	Un_Bathyarchaeia	Un_Bathyarchaeia		0	0	0	0	0	0	0	0	0	0	0	0	0	0	0	0	0	0	0	0	0	0	0	0	0	0	0	0	0	0	0	0	0	121	0	106	0	0	0	0	0
A_ASV00776	Archaea	Crenarchaeota	Nitrososphaeria	Caldiarchaeales	Geothermarchaeaceae	Un_Geothermarchaeaceae	Un_Geothermarchaeaceae		12	0	0	0	22	0	50	0	71	0	0	0	0	0	0	0	0	0	0	0	0	0	0	0	0	0	0	33	0	13	0	4	22	0	0	0	0	0	0	0	0
A_ASV00778	Archaea	Nanoarchaeota	Nanoarchaeia	Woesearchaeales	Un_Woesearchaeales	Un_Woesearchaeales	Un_Woesearchaeales		0	0	0	0	0	0	0	0	0	29	0	36	0	0	0	0	0	0	0	0	0	0	0	0	0	0	0	40	46	28	48	0	0	0	0	0	0	0	0	0	0
A_ASV00779	Archaea	Nanoarchaeota	Nanoarchaeia	Woesearchaeales	Un_Woesearchaeales	Un_Woesearchaeales	Un_Woesearchaeales		0	0	0	0	0	0	0	0	0	3	0	0	0	0	0	0	0	0	0	0	0	0	0	0	0	0	0	0	28	50	69	41	36	0	0	0	0	0	0	0	0
A_ASV00782	Archaea	Crenarchaeota	Nitrososphaeria	Nitrosopumilales	Nitrosopumilaceae	Un_Nitrosopumilaceae	Un_Nitrosopumilaceae		8	13	8	20	0	0	0	19	0	0	0	0	0	0	0	0	0	0	0	0	0	0	0	0	0	0	0	0	0	0	0	0	0	0	0	0	46	53	8	0	28
A_ASV00783	Archaea	Nanoarchaeota	Nanoarchaeia	Woesearchaeales	GW2011	AR15	Un_AR15		0	0	0	0	0	0	0	0	0	0	0	0	0	0	0	0	0	0	0	0	0	0	0	0	0	0	0	0	0	0	0	0	0	0	226	0	0	0	0	0	0
A_ASV00785	Archaea	Crenarchaeota	Bathyarchaeia	Un_Bathyarchaeia	Un_Bathyarchaeia	Un_Bathyarchaeia	Un_Bathyarchaeia		0	0	0	0	0	0	0	0	0	48	6	0	0	1	0	36	0	0	0	0	0	0	0	0	0	0	0	0	0	0	56	78	0	0	0	0	0	0	0	0	0
A_ASV00787	Archaea	Crenarchaeota	Bathyarchaeia	Un_Bathyarchaeia	Un_Bathyarchaeia	Un_Bathyarchaeia	Un_Bathyarchaeia		0	0	0	0	0	0	0	0	0	0	0	0	0	0	0	0	0	0	0	0	0	0	0	225	0	0	0	0	0	0	0	0	0	0	0	0	0	0	0	0	0
A_ASV00788	Archaea	Thermoplasmatota	Thermoplasmata	Marine Benthic Group D and DHVEG-1	Un_Marine Benthic Group D and DHVEG-1	Un_Marine Benthic Group D and DHVEG-1	Un_Marine Benthic Group D and DHVEG-1		0	0	0	0	0	0	0	0	0	0	0	0	0	0	0	0	0	0	0	0	0	0	0	0	0	0	0	0	0	0	0	0	0	225	0	0	0	0	0	0	0
A_ASV00790	Archaea	Crenarchaeota	Bathyarchaeia	Un_Bathyarchaeia	Un_Bathyarchaeia	Un_Bathyarchaeia	Un_Bathyarchaeia		0	0	0	0	0	0	0	0	0	0	0	0	0	0	0	0	0	0	0	0	0	224	0	0	0	0	0	0	0	0	0	0	0	0	0	0	0	0	0	0	0
A_ASV00793	Archaea	Crenarchaeota	Nitrososphaeria	Nitrosopumilales	Nitrosopumilaceae	Candidatus Nitrosopumilus	Un_Candidatus Nitrosopumilus		0	0	0	0	0	0	0	0	0	0	0	0	0	0	0	0	0	0	0	0	0	223	0	0	0	0	0	0	0	0	0	0	0	0	0	0	0	0	0	0	0
A_ASV00792	Archaea	Thermoplasmatota	Thermoplasmata	Marine Benthic Group D and DHVEG-1	Un_Marine Benthic Group D and DHVEG-1	Un_Marine Benthic Group D and DHVEG-1	Un_Marine Benthic Group D and DHVEG-1		0	0	0	0	37	10	0	1	0	0	22	0	0	3	21	13	18	26	0	0	0	0	0	0	0	0	0	0	0	3	9	24	17	0	19	0	0	0	0	0	0
A_ASV00795	Archaea	Crenarchaeota	Bathyarchaeia	Un_Bathyarchaeia	Un_Bathyarchaeia	Un_Bathyarchaeia	Un_Bathyarchaeia		45	0	0	0	0	0	0	44	0	0	0	0	0	0	0	0	0	0	0	0	0	0	0	0	0	0	0	31	0	0	0	0	0	102	0	0	0	0	0	0	0
A_ASV00798	Archaea	Halobacterota	Methanosarcinia	Methanosarciniales	Methanosaetaceae	Methanosaeta	Un_Methanosaeta		0	0	0	0	0	0	0	0	0	0	0	0	0	0	0	0	0	0	0	0	0	0	0	0	0	0	0	0	0	0	0	0	0	0	0	222	0	0	0	0	0
A_ASV00796	Archaea	Nanoarchaeota	Nanoarchaeia	Woesearchaeales	Un_Woesearchaeales	Un_Woesearchaeales	Un_Woesearchaeales		0	53	112	0	0	18	0	0	0	0	0	0	0	0	0	0	0	0	0	0	0	0	0	0	0	0	0	0	0	0	0	0	0	0	0	0	0	0	39	0	0
A_ASV00797	Archaea	Thermoplasmatota	Thermoplasmata	Marine Benthic Group D and DHVEG-1	Un_Marine Benthic Group D and DHVEG-1	Un_Marine Benthic Group D and DHVEG-1	Un_Marine Benthic Group D and DHVEG-1		0	0	0	0	0	0	21	0	62	0	0	0	0	0	0	0	22	34	0	0	0	0	0	0	0	0	0	0	0	0	0	0	0	0	0	0	0	0	0	0	25
A_ASV00800	Archaea	Crenarchaeota	Bathyarchaeia	Un_Bathyarchaeia	Un_Bathyarchaeia	Un_Bathyarchaeia	Un_Bathyarchaeia		0	0	0	0	0	0	0	82	95	0	0	0	0	0	0	0	0	0	0	0	0	0	0	0	0	0	0	0	0	0	44	0	0	0	0	0	0	0	0	0	0
A_ASV00799	Archaea	Nanoarchaeota	Nanoarchaeia	Woesearchaeales	Un_Woesearchaeales	Un_Woesearchaeales	Un_Woesearchaeales		0	0	0	0	50	0	17	0	0	0	0	0	0	0	0	0	0	0	0	0	0	0	0	0	0	0	0	0	0	0	0	10	0	0	0	0	0	0	0	144	0
A_ASV00803	Archaea	Crenarchaeota	Bathyarchaeia	Un_Bathyarchaeia	Un_Bathyarchaeia	Un_Bathyarchaeia	Un_Bathyarchaeia		0	0	0	0	19	0	0	0	26	0	0	0	0	0	0	15	0	0	0	0	0	0	0	0	0	0	0	0	0	0	0	9	0	0	0	0	0	0	0	33	32
A_ASV00804	Archaea	Crenarchaeota	Bathyarchaeia	Un_Bathyarchaeia	Un_Bathyarchaeia	Un_Bathyarchaeia	Un_Bathyarchaeia		0	0	0	0	0	0	0	0	0	0	0	0	0	0	0	0	0	0	0	0	0	0	0	0	0	0	0	0	0	0	0	0	0	0	220	0	0	0	0	0	0
A_ASV00805	Archaea	Crenarchaeota	Nitrososphaeria	Nitrosopumilales	Nitrosopumilaceae	Candidatus Nitrosopumilus	Un_Candidatus Nitrosopumilus		0	0	0	0	0	0	0	0	0	0	0	0	0	0	0	0	0	0	0	0	0	0	0	0	0	0	0	0	0	0	0	0	0	0	0	0	111	109	0	0	0
A_ASV00807	Archaea	Asgardarchaeota	Lokiarchaeia	Lokiarchaeia	Lokiarchaeia	Lokiarchaeia	Lokiarchaeia		0	0	0	0	0	0	0	0	0	23	0	0	0	0	0	0	0	0	0	0	0	0	0	0	0	0	0	0	0	0	0	0	0	0	196	0	0	0	0	0	0
A_ASV00806	Archaea	Hydrothermarchaeota	Hydrothermarchaeia	Hydrothermarchaeales	Un_Hydrothermarchaeales	Un_Hydrothermarchaeales	Un_Hydrothermarchaeales		0	0	0	0	111	32	37	0	0	0	0	0	0	0	0	0	0	0	0	0	0	0	0	0	0	0	0	0	0	0	0	0	0	0	0	0	0	0	0	0	39
A_ASV00809	Archaea	Crenarchaeota	Bathyarchaeia	Un_Bathyarchaeia	Un_Bathyarchaeia	Un_Bathyarchaeia	Un_Bathyarchaeia		0	0	0	0	18	0	0	0	0	0	0	0	0	0	0	0	42	0	0	0	0	0	0	0	0	0	0	0	17	27	0	39	30	45	0	0	0	0	0	0	0
A_ASV00812	Archaea	Crenarchaeota	Bathyarchaeia	Un_Bathyarchaeia	Un_Bathyarchaeia	Un_Bathyarchaeia	Un_Bathyarchaeia		0	0	0	0	0	0	0	0	0	0	0	0	0	0	0	31	0	0	0	0	0	0	0	0	0	0	0	46	0	0	0	0	41	0	100	0	0	0	0	0	0
A_ASV00808	Archaea	Crenarchaeota	Bathyarchaeia	Un_Bathyarchaeia	Un_Bathyarchaeia	Un_Bathyarchaeia	Un_Bathyarchaeia		41	0	0	0	0	0	0	0	0	0	0	0	0	0	0	0	0	0	38	0	0	0	0	0	0	0	0	0	0	21	15	0	0	0	103	0	0	0	0	0	0
A_ASV00811	Archaea	Thermoplasmatota	Thermoplasmata	Marine Benthic Group D and DHVEG-1	Un_Marine Benthic Group D and DHVEG-1	Un_Marine Benthic Group D and DHVEG-1	Un_Marine Benthic Group D and DHVEG-1		0	0	0	0	0	0	0	0	0	0	0	0	47	0	17	0	0	0	0	0	0	0	0	0	0	0	0	0	0	0	0	0	0	0	0	154	0	0	0	0	0
A_ASV00816	Archaea	Crenarchaeota	Bathyarchaeia	Un_Bathyarchaeia	Un_Bathyarchaeia	Un_Bathyarchaeia	Un_Bathyarchaeia		0	0	0	0	0	0	0	115	0	0	0	0	0	0	0	0	0	0	0	0	0	0	0	0	0	0	0	0	0	0	0	0	0	0	0	0	0	0	0	0	0
A_ASV00815	Archaea	Nanoarchaeota	Nanoarchaeia	Woesearchaeales	Un_Woesearchaeales	Un_Woesearchaeales	Un_Woesearchaeales		0	0	0	0	49	51	0	0	0	0	0	0	0	0	40	77	0	0	0	0	0	0	0	0	0	0	0	0	0	0	0	0	0	0	0	0	0	0	0	0	0
A_ASV00821	Archaea	Halobacterota	Methanocellia	Methanocellales	Methanocellaceae	Rice Cluster I	Un_Rice Cluster I		0	0	0	0	0	0	0	0	0	0	0	0	0	0	0	0	0	0	0	0	0	0	0	0	0	0	0	0	0	0	31	0	0	0	0	185	0	0	0	0	0
A_ASV00817	Archaea	Nanoarchaeota	Nanoarchaeia	Woesearchaeales	Un_Woesearchaeales	Un_Woesearchaeales	Un_Woesearchaeales		0	11	51	0	0	0	0	0	0	0	0	0	0	0	0	0	0	0	0	0	0	0	0	0	0	0	0	0	0	0	0	0	0	0	0	0	39	81	34	0	0
A_ASV00823	Archaea	Crenarchaeota	Nitrososphaeria	Nitrosopumilales	Nitrosopumilaceae	Candidatus Nitrosopumilus	Un_Candidatus Nitrosopumilus		0	0	0	0	0	0	0	0	0	0	0	0	0	0	0	0	0	0	0	0	0	0	0	0	0	0	0	0	0	0	0	0	0	0	0	215	0	0	0	0	0
A_ASV00822	Archaea	Thermoplasmatota	Thermoplasmata	Un_Thermoplasmata	Un_Thermoplasmata	Un_Thermoplasmata	Un_Thermoplasmata		0	0	13	0	0	0	0	52	0	0	0	0	0	32	0	0	0	0	0	0	0	0	0	0	0	0	0	0	0	0	0	0	0	0	0	69	0	0	0	0	31
A_ASV00826	Archaea	Hydrothermarchaeota	Hydrothermarchaeia	Hydrothermarchaeales	Un_Hydrothermarchaeales	Un_Hydrothermarchaeales	Un_Hydrothermarchaeales		0	0	0	0	0	0	0	0	0	0	0	0	0	0	0	0	0	0	0	0	0	0	0	0	0	0	0	0	0	0	0	0	0	0	0	214	0	0	0	0	0
A_ASV00824	Archaea	Un_Archaea	Un_Archaea	Un_Archaea	Un_Archaea	Un_Archaea	Un_Archaea		0	0	0	0	0	0	0	0	0	0	0	0	0	0	0	48	52	0	0	0	0	0	0	0	0	0	0	0	0	0	0	0	0	0	114	0	0	0	0	0	0
A_ASV00827	Archaea	Un_Archaea	Un_Archaea	Un_Archaea	Un_Archaea	Un_Archaea	Un_Archaea		0	0	0	0	0	0	0	0	0	0	0	0	0	0	0	0	0	0	0	0	0	0	0	0	0	0	0	0	0	0	0	0	0	0	0	214	0	0	0	0	0
A_ASV00828	Archaea	Asgardarchaeota	Un_Asgardarchaeota	Un_Asgardarchaeota	Un_Asgardarchaeota	Un_Asgardarchaeota	Un_Asgardarchaeota		0	0	0	0	0	48	56	0	0	0	0	0	0	0	13	0	0	0	21	0	0	0	0	0	0	0	0	0	0	0	0	0	0	0	0	0	8	0	0	0	0
A_ASV00830	Archaea	Crenarchaeota	Bathyarchaeia	Un_Bathyarchaeia	Un_Bathyarchaeia	Un_Bathyarchaeia	Un_Bathyarchaeia		0	0	0	0	0	0	0	0	64	0	0	0	36	0	31	32	0	0	0	0	0	0	0	0	0	0	0	0	0	0	0	0	0	0	0	0	0	0	0	0	0
A_ASV00831	Archaea	Asgardarchaeota	Lokiarchaeia	Lokiarchaeia	Lokiarchaeia	Lokiarchaeia	Lokiarchaeia		0	0	0	0	0	0	69	30	0	0	0	0	0	0	0	0	0	0	0	0	0	0	0	0	0	0	0	0	0	0	0	0	0	0	0	0	0	0	0	0	0
A_ASV00832	Archaea	Crenarchaeota	Bathyarchaeia	Un_Bathyarchaeia	Un_Bathyarchaeia	Un_Bathyarchaeia	Un_Bathyarchaeia		0	0	0	0	0	0	0	29	68	0	0	0	0	0	0	0	0	0	0	0	0	0	0	0	0	0	0	0	0	0	0	0	0	0	0	114	0	0	0	0	0
A_ASV00834	Archaea	Crenarchaeota	Bathyarchaeia	Un_Bathyarchaeia	Un_Bathyarchaeia	Un_Bathyarchaeia	Un_Bathyarchaeia		0	0	0	0	0	0	0	0	0	0	0	0	0	0	0	0	0	0	0	0	0	0	0	0	0	0	0	0	0	0	0	0	0	0	211	0	0	0	0	0	0
A_ASV00835	Archaea	Thermoplasmatota	Thermoplasmata	Marine Benthic Group D and DHVEG-1	Un_Marine Benthic Group D and DHVEG-1	Un_Marine Benthic Group D and DHVEG-1	Un_Marine Benthic Group D and DHVEG-1		0	0	0	0	0	0	0	0	0	0	0	0	0	0	0	0	0	0	0	0	0	0	0	0	0	0	0	0	0	0	0	0	0	0	0	0	0	0	0	0	0
A_ASV00836	Archaea	Crenarchaeota	Bathyarchaeia	Un_Bathyarchaeia	Un_Bathyarchaeia	Un_Bathyarchaeia	Un_Bathyarchaeia		0	0	0	0	0	0	0	0	0	0	0	0	0	0	0	0	0	0	0	175	0	0	0	0	0	0	0	0	0	0	0	0	0	0	0	0	0	0	0	0	0
A_ASV00840	Archaea	Crenarchaeota	Bathyarchaeia	Un_Bathyarchaeia	Un_Bathyarchaeia	Un_Bathyarchaeia	Un_Bathyarchaeia		0	0	0	0	0	0	0	0	0	0	0	0	0	0	0	0	0	0	0	0	0	0	0	0	209	0	0	0	0	0	0	0	0	0	0	0	0	0	0	0	0
A_ASV00838	Archaea	Halobacterota	Methanosarcinia	Methanosarciniales	Un_Methanosarciniales	Un_Methanosarciniales	Un_Methanosarciniales		15	6	0	0	0	0	0	0	0	0	0	0	0	0	0	0	0	0	0	0	0	0	0	0	0	0	0	34	40	28	61	0	25	0	0	0	0	0	0	0	0
A_ASV00839	Archaea	Nanoarchaeota	Nanoarchaeia	Woesearchaeales	Un_Woesearchaeales	Un_Woesearchaeales	Un_Woesearchaeales		0	0	0	0	0	0	0	0	0	0	38	0	0	49	24	0	43	22	0	0	0	0	0	0	0	0	0	16	0	17	0	0	0	0	0	0	0	0	0	0	0
A_ASV00844	Archaea	Crenarchaeota	Bathyarchaeia	Un_Bathyarchaeia	Un_Bathyarchaeia	Un_Bathyarchaeia	Un_Bathyarchaeia		0	0	0	0	0	0	0	0	0	0	0	0	0	0	0	0	0	0	0	0	0	0	0	208	0	0	0	0	0	0	0	0	0	0	0	0	0	0	0	0	0
A_ASV00845	Archaea	Crenarchaeota	Bathyarchaeia	Un_Bathyarchaeia	Un_Bathyarchaeia	Un_Bathyarchaeia	Un_Bathyarchaeia		0	0	0	0	0	0	0	0	0	0	0	0	0	0	0	0	0	0	0	0	0	0	0	0	0	0	0	0	0	0	14	0	0	0	0	194	0	0	0	0	0
A_ASV00846	Archaea	Nanoarchaeota	Nanoarchaeia	Woesearchaeales	Un_Woesearchaeales	Un_Woesearchaeales	Un_Woesearchaeales		0	0	0	0	0	0	0	0	0	0	0	0	0	0	0	0	0	0	0	0	0	0	0	0	0	0	0	0	0	0	0	0	0	0	208	0	0	0	0	0	0
A_ASV00848	Archaea	Crenarchaeota	Bathyarchaeia	Un_Bathyarchaeia	Un_Bathyarchaeia	Un_Bathyarchaeia	Un_Bathyarchaeia		0	0	0	0	0	0	0	51	57	0	0	0	0	0	0	0	0	0	0	0	0	0	0	0	0	0	0	0	0	0	0	0	0	0	0	0	0	0	0	0	0
A_ASV00851	Archaea	Crenarchaeota	Bathyarchaeia	Un_Bathyarchaeia	Un_Bathyarchaeia	Un_Bathyarchaeia	Un_Bathyarchaeia		0	0	0	0	0	0	0	0	0	0	0	0	0	0	0	0	0	0	0	0	0	0	0	0	0	0	0	0	0	0	0	0	0	0	206	0	0	0	0	0	0
A_ASV00849	Archaea	Euryarchaeota	Methanobacteria	Methanobacteriales	Methanobacteriaceae	Methanobacterium	bryantii		0	0	0	0	0	14	0	0	0	0	0	0	0	0	0	0	0	0	0	0	0	0	0	0	0	0	0	0	0	0	33	0	0	47	0	112	0	0	0	0	0
A_ASV00858	Archaea	Crenarchaeota	Nitrososphaeria	Nitrosopumilales	Nitrosopumilaceae	Candidatus Nitrosopumilus	Un_Candidatus Nitrosopumilus		0	0	0	0	0	0	0	0	0	0	0	0	0	0	0	0	0	0	0	0	0	203	0	0	0	0	0	0	0	0	0	0	0	0	0	0	0	0	0	0	0
A_ASV00857	Archaea	Nanoarchaeota	Nanoarchaeia	Woesearchaeales	Un_Woesearchaeales	Un_Woesearchaeales	Un_Woesearchaeales		0	0	15	0	0	0	0	0	0	0	20	40	22	46	21	17	9	13	0	0	0	0	0	0	0	0	0	0	0	0	0	0	0	0	0	0	0	0	0	0	0
A_ASV00861	Archaea	Asgardarchaeota	Lokiarchaeia	Lokiarchaeia	Lokiarchaeia	Lokiarchaeia	Lokiarchaeia		0	0	0	0	0	0	0	0	0	0	0	0	0	0	0	0	0	0	0	0	0	0	0	0	0	0	0	0	96	0	0	0	0	106	0	0	0	0	0	0	0
A_ASV00862	Archaea	Asgardarchaeota	Odinarchaeia	Un_Odinarchaeia	Un_Odinarchaeia	Un_Odinarchaeia	Un_Odinarchaeia		27	0	0	18	0	0	51	0	0	0	0	0	0	0	0	0	0	0	0	0	0	0	0	0	0	0	0	0	0	0	0	0	0	0	0	0	0	0	0	0	0
A_ASV00864	Archaea	Crenarchaeota	Bathyarchaeia	Un_Bathyarchaeia	Un_Bathyarchaeia	Un_Bathyarchaeia	Un_Bathyarchaeia		0	0	0	0	0	0	0	0	0	0	0	0	0	0	0	0	0	0	0	0	0	201	0	0	0	0	0	0	0	0	0	0	0	0	0	0	0	0	0	0	0
A_ASV00865	Archaea	Thermoplasmatota	Thermoplasmata	Marine Benthic Group D and DHVEG-1	Un_Marine Benthic Group D and DHVEG-1	Un_Marine Benthic Group D and DHVEG-1	Un_Marine Benthic Group D and DHVEG-1		0	0	0	0	0	0	0	0	0	0	0	0	0	0	0	0	0	0	0	0	0	0	0	0	0	0	0	0	0	0	0	74	0	127	0	0	0	0	0	0	0
A_ASV00866	Archaea	Crenarchaeota	Bathyarchaeia	Un_Bathyarchaeia	Un_Bathyarchaeia	Un_Bathyarchaeia	Un_Bathyarchaeia		0	0	0	0	0	0	0	0	0	0	0	0	0	0	0	0	0	0	0	0	0	0	0	200	0	0	0	0	0	0	0	0	0	0	0	0	0	0	0	0	0
A_ASV00867	Archaea	Un_Archaea	Un_Archaea	Un_Archaea	Un_Archaea	Un_Archaea	Un_Archaea		0	0	0	0	0	0	0	0	0	0	0	0	0	0	0	0	0	0	0	0	0	0	0	0	0	0	0	57	0	0	0	89	54	0	0	0	0	0	0	0	0
A_ASV00868	Archaea	Crenarchaeota	Bathyarchaeia	Un_Bathyarchaeia	Un_Bathyarchaeia	Un_Bathyarchaeia	Un_Bathyarchaeia		30	0	0	0	0	19	0	0	2	0	0	0	0	0	0	0	0	0	0	0	0	0	0	0	0	0	0	0	0	0	0	0	0	0	0	0	37	16	0	0	2
A_ASV00873	Archaea	Crenarchaeota	Bathyarchaeia	Un_Bathyarchaeia	Un_Bathyarchaeia	Un_Bathyarchaeia	Un_Bathyarchaeia		0	0	0	0	0	0	0	0	0	0	0	0	0	0	0	0	0	0	0	0	0	0	0	0	0	0	0	0	0	0	0	0	0	0	0	50	0	0	0	0	0
A_ASV00874	Archaea	Crenarchaeota	Bathyarchaeia	Un_Bathyarchaeia	Un_Bathyarchaeia	Un_Bathyarchaeia	Un_Bathyarchaeia		0	0	0	0	0	0	0	0	0	0	0	0	0	0	0	0	0	0	0	0	0	0	0	0	0	0	0	0	0	0	0	0	0	0	0	0	0	0	0	76	0
A_ASV00872	Archaea	Un_Archaea	Un_Archaea	Un_Archaea	Un_Archaea	Un_Archaea	Un_Archaea		0	0	0	0	0	0	0	0	0	0	0	0	0	0	0	0	0	0	0	0	0	0	0	0	0	0	0	0	0	0	0	0	0	0	198	0	0	0	0	0	0
A_ASV00871	Archaea	Nanoarchaeota	Nanoarchaeia	Woesearchaeales	Un_Woesearchaeales	Un_Woesearchaeales	Un_Woesearchaeales		0	0	0	0	0	0	0	0	0	0	0	0	0	22	0	0	0	0	176	0	0	0	0	0	0	0	0	0	0	0	0	0	0	0	0	0	0	0	0	0	0
A_ASV00876	Archaea	Crenarchaeota	Bathyarchaeia	Un_Bathyarchaeia	Un_Bathyarchaeia	Un_Bathyarchaeia	Un_Bathyarchaeia		0	0	0	0	0	0	0	0	0	0	0	0	0	0	0	0	0	0	0	0	197	0	0	0	0	0	0	0	0	0	0	0	0	0	0	0	0	0	0	0	0
A_ASV00877	Archaea	Crenarchaeota	Bathyarchaeia	Un_Bathyarchaeia	Un_Bathyarchaeia	Un_Bathyarchaeia	Un_Bathyarchaeia		0	0	0	0	0	0	0	0	0	0	0	0	0	0	0	0	0	0	0	0	0	0	0	0	0	0	197	0	0	0	0	0	0	0	0	0	0	0	0	0	0
A_ASV00878	Archaea	Crenarchaeota	Bathyarchaeia	Un_Bathyarchaeia	Un_Bathyarchaeia	Un_Bathyarchaeia	Un_Bathyarchaeia		0	0	0	0	0	0	0	0	0	0	0	0	0	0	0	0	0	0	0	0	0	0	0	0	0	0	0	0	0	0	0	0	0	0	24	173	0	0	0	0	0
A_ASV00879	Archaea	Crenarchaeota	Nitrososphaeria	Nitrosopumilales	Nitrosopumilaceae	Un_Nitrosopumilaceae	Un_Nitrosopumilaceae		0	0	0	0	0	0	0	0	0	0	0	0	0	0	0	0	0	0	0	0	0	0	0	0	0	0	0	0	0	0	0	0	0	0	0	0	46	47	65	3	36
A_ASV00880	Archaea	Asgardarchaeota	Odinarchaeia	Un_Odinarchaeia	Un_Odinarchaeia	Un_Odinarchaeia	Un_Odinarchaeia		0	0	0	0	0	0	0	0	0	0	0	0	0	0	25	0	0	0	0	0	0	0	0	0	100	0	0	0	0	71	0	0	0	0	0	0	0	0	0	0	0
A_ASV00881	Archaea	Iainarchaeota	Iainarchaeia	Iainarchaeales	Candidatus Iainarchaeum	Un_Candidatus Iainarchaeum	Un_Candidatus Iainarchaeum		0	0	0	0	0	0	0	0	0	0	0	0	0	0	0	0	0	0	0	0	196	0	0	0	0	0	0	0	0	0	0	0	0	0	0	0	0	0	0	0	0
A_ASV00884	Archaea	Thermoplasmatota	Thermoplasmata	Marine Benthic Group D and DHVEG-1	Un_Marine Benthic Group D and DHVEG-1	Un_Marine Benthic Group D and DHVEG-1	Un_Marine Benthic Group D and DHVEG-1		49	0	0	0	0	0	0	0	82	0	30	0	33	0	0	0	0	0	0	0	0	0	0	0	0	0	0	0	0	0	0	0	0	0	0	0	0	0	0	0	0
A_ASV00888	Archaea	Crenarchaeota	Bathyarchaeia	Un_Bathyarchaeia	Un_Bathyarchaeia	Un_Bathyarchaeia	Un_Bathyarchaeia		0	0	0	0	0	0	0	0	0	0	0	0	0	0	0	0	0	0	0	0	0	0	0	0	0	0	0	0	0	0	0	0	0	0	0	193	0	0	0	0	0
A_ASV00886	Archaea	Halobacterota	Methanomicrobia	Methanomicrobiales	Methanomicrobiaceae	Methanogenium	Un_Methanogenium		0	0	0	11	0	0	0	0	0	0	0	0	0	0	0	15	0	0	0	0	0	0	0	0	0	0	0	0	0	128	39	0	0	0	0	0	0	0	0	0	0
A_ASV00889	Archaea	Crenarchaeota	Bathyarchaeia	Un_Bathyarchaeia	Un_Bathyarchaeia	Un_Bathyarchaeia	Un_Bathyarchaeia		0	0	0	0	0	0	0	0	0	0	0	0	0	0	0	0	0	0	0	0	0	0	0	0	0	0	0	0	0	0	0	0	0	0	0	192	0	0	0	0	0
A_ASV00890	Archaea	Crenarchaeota	Bathyarchaeia	Un_Bathyarchaeia	Un_Bathyarchaeia	Un_Bathyarchaeia	Un_Bathyarchaeia		0	25	0	0	0	0	0	0	0	0	0	0	0	32	0	42	0	47	0	0	0	0	0	0	0	0	0	0	0	0	16	0	0	29	0	0	0	0	0	0	0
A_ASV00893	Archaea	Un_Archaea	Un_Archaea	Un_Archaea	Un_Archaea	Un_Archaea	Un_Archaea		0	0	0	0	0	0	0	0	0	0	0	0	0	0	0	0	0	0	0	0	0	0	0	0	0	0	0	0	0	0	0	0	0	0	0	191	0	0	0	0	0
A_ASV00898	Archaea	Crenarchaeota	Bathyarchaeia	Un_Bathyarchaeia	Un_Bathyarchaeia	Un_Bathyarchaeia	Un_Bathyarchaeia		0	0	0	0	0	0	0	51	114	0	0	0	0	0	0	0	0	0	0	0	0	0	0	0	0	0	0	0	0	25	0	0	0	0	0	0	0	0	0	0	0
A_ASV00901	Archaea	Crenarchaeota	Bathyarchaeia	Un_Bathyarchaeia	Un_Bathyarchaeia	Un_Bathyarchaeia	Un_Bathyarchaeia		0	0	0	0	0	0	0	0	0	0	0	0	0	0	0	0	0	0	0	0	0	0	0	0	190	0	0	0	0	0	0	0	0	0	0	0	0	0	0	0	0
A_ASV00897	Archaea	Thermoplasmatota	Thermoplasmata	Un_Thermoplasmata	Un_Thermoplasmata	Un_Thermoplasmata	Un_Thermoplasmata		0	0	26	42	0	0	0	0	0	0	0	0	0	33	23	0	0	66	0	0	0	0	0	0	0	0	0	0	0	0	0	0	0	0	0	0	0	0	0	0	0
A_ASV00906	Archaea	Crenarchaeota	Bathyarchaeia	Un_Bathyarchaeia	Un_Bathyarchaeia	Un_Bathyarchaeia	Un_Bathyarchaeia		0	0	0	0	0	0	0	0	0	0	0	0	0	0	0	0	0	0	0	0	0	0	0	0	0	0	0	0	0	0	0	0	0	0	189	0	0	0	0	0	0
A_ASV00905	Archaea	Halobacterota	Methanomicrobia	Methanomicrobiales	Methanoregulaceae	Methanoregula	Un_Methanoregula		0	0	0	0	0	0	0	0	0	0	0	0	0	0	0	0	0	0	0	0	0	0	0	0	0	0	0	0	0	0	77	0	0	0	0	112	0	0	0	0	0
A_ASV00904	Archaea	Halobacterota	Methanosarcinia	Methanosarciniales	Methanosarcinaceae	Methanohalophilus	Un_Methanohalophilus		0	0	0	0	0	0	0	0	0	0	0	0	0	0	0	0	0	0	0	0	0	0	0	0	0	0	0	21	0	0	51	83	34	0	0	0	0	0	0	0	0
A_ASV00907	Archaea	Crenarchaeota	Nitrososphaeria	Nitrosopumilales	Nitrosopumilaceae	Candidatus Nitrosopumilus	Un_Candidatus Nitrosopumilus		76	50	62	0	0	0	0	0	0	0	0	0	0	0	0	0	0	0	0	0	0	0	0	0	0	0	0	0	0	0	0	0	0	0	0	0	0	0	0	0	0
A_ASV00909	Archaea	Crenarchaeota	Bathyarchaeia	Un_Bathyarchaeia	Un_Bathyarchaeia	Un_Bathyarchaeia	Un_Bathyarchaeia		0	0	0	0	0	0	0	0	0	0	0	0	0	0	0	0	0	0	0	0	0	0	0	0	0	0	0	0	0	0	0	0	0	0	187	0	0	0	0	0	0
A_ASV00910	Archaea	Crenarchaeota	Bathyarchaeia	Un_Bathyarchaeia	Un_Bathyarchaeia	Un_Bathyarchaeia	Un_Bathyarchaeia		0	0	0	0	0	0	0	0	0	0	0	0	0	0	0	0	0	0	0	0	0	0	186	0	0	0	0	0	0	0	0	0	0	0	0	0	0	0	0	0	0
A_ASV00912	Archaea	Crenarchaeota	Bathyarchaeia	Un_Bathyarchaeia	Un_Bathyarchaeia	Un_Bathyarchaeia	Un_Bathyarchaeia		0	0	0	0	0	0	0	0	0	0	0	0	0	0	0	0	0	0	0	0	0	0	0	0	0	0	0	0	0	0	0	0	0	35	151	0	0	0	0	0	0
A_ASV00913	Archaea	Un_Archaea	Un_Archaea	Un_Archaea	Un_Archaea	Un_Archaea	Un_Archaea		0	0	0	0	0	0	0	0	0	0	0	0	0	0	0	0	0	0	0	0	0	0	0	0	0	0	0	0	0	0	0	0	0	0	0	0	0	0	0	162	0
A_ASV00914	Archaea	Crenarchaeota	Nitrososphaeria	Nitrosopumilales	Nitrosopumilaceae	Candidatus Nitrosopumilus	Un_Candidatus Nitrosopumilus		0	0	0	0	0	0	0	0	0	0	0	0	0	0	0	0	0	0	0	0	0	0	0	185	0	0	0	0	0	0	0	0	0	0	0	0	0	0	0	0	0
A_ASV00915	Archaea	Nanoarchaeota	Nanoarchaeia	Woesearchaeales	Un_Woesearchaeales	Un_Woesearchaeales	Un_Woesearchaeales		0	0	14	17	0	0	0	0	0	0	0	18	0	19	35	0	18	0	0	0	0	0	0	0	0	0	0	0	10	20	11	11	11	0	0	0	0	0	0	0	0
A_ASV00916	Archaea	Thermoplasmatota	Thermoplasmata	Marine Benthic Group D and DHVEG-1	Un_Marine Benthic Group D and DHVEG-1	Un_Marine Benthic Group D and DHVEG-1	Un_Marine Benthic Group D and DHVEG-1		0	0	0	0	0	0	0	0	0	0	0	0	0	0	0	0	0	0	0	0	0	0	0	0	0	0	0	0	0	0	0	0	0	0	184	0	0	0	0	0	0
A_ASV00918	Archaea	Crenarchaeota	Bathyarchaeia	Un_Bathyarchaeia	Un_Bathyarchaeia	Un_Bathyarchaeia	Un_Bathyarchaeia		0	0	0	0	0	0	0	0	0	0	0	0	0	0	0	0	0	0	0	0	0	0	0	0	0	0	0	59	0	0	63	61	0	0	0	0	0	0	0	0	0
A_ASV00919	Archaea	Crenarchaeota	Nitrososphaeria	Nitrosopumilales	Nitrosopumilaceae	Cenarchaeum	Un_Cenarchaeum		0	0	0	0	0	0	0	0	0	0	0	0	0	0	0	0	0	0	0	0	0	0	0	0	0	0	0	0	0	0	0	0	0	0	0	0	0	0	0	151	0
A_ASV00922	Archaea	Crenarchaeota	Bathyarchaeia	Un_Bathyarchaeia	Un_Bathyarchaeia	Un_Bathyarchaeia	Un_Bathyarchaeia		0	0	0	0	0	0	0	0	0	0	0	0	0	0	0	0	0	0	0	0	0	0	0	0	0	182	0	0	0	0	0	0	0	0	0	0	0	0	0	0	0
A_ASV00924	Archaea	Crenarchaeota	Bathyarchaeia	Un_Bathyarchaeia	Un_Bathyarchaeia	Un_Bathyarchaeia	Un_Bathyarchaeia		0	0	0	0	0	0	0	0	0	0	0	0	0	0	0	0	0	0	0	0	0	0	0	0	0	0	0	0	0	0	0	0	0	0	0	0	0	0	0	0	42
A_ASV00923	Archaea	Un_Archaea	Un_Archaea	Un_Archaea	Un_Archaea	Un_Archaea	Un_Archaea		0	0	0	0	0	0	0	0	0	0	0	0	0	0	0	0	0	0	0	0	0	0	0	0	0	0	0	0	0	0	0	0	0	0	182	0	0	0	0	0	0
A_ASV00928	Archaea	Asgardarchaeota	Lokiarchaeia	Lokiarchaeia	Lokiarchaeia	Lokiarchaeia	Lokiarchaeia		0	0	0	7	0	0	0	0	52	23	0	0	0	0	0	0	0	0	98	0	0	0	0	0	0	0	0	0	0	0	0	0	0	0	0	0	0	0	0	0	0
A_ASV00930	Archaea	Crenarchaeota	Bathyarchaeia	Un_Bathyarchaeia	Un_Bathyarchaeia	Un_Bathyarchaeia	Un_Bathyarchaeia		0	0	0	0	0	0	0	0	0	0	7	0	0	0	0	29	28	34	0	0	0	0	0	0	0	0	0	0	0	0	0	31	51	0	0	0	0	0	0	0	0
A_ASV00932	Archaea	Crenarchaeota	Bathyarchaeia	Un_Bathyarchaeia	Un_Bathyarchaeia	Un_Bathyarchaeia	Un_Bathyarchaeia		0	0	0	0	0	22	0	0	0	0	0	0	0	0	0	15	0	0	0	0	0	0	0	0	0	0	0	0	0	0	0	0	0	0	0	0	0	0	0	0	0
A_ASV00934	Archaea	Crenarchaeota	Bathyarchaeia	Un_Bathyarchaeia	Un_Bathyarchaeia	Un_Bathyarchaeia	Un_Bathyarchaeia		0	0	0	0	0	0	0	0	0	0	0	0	0	0	0	0	0	0	0	0	0	179	0	0	0	0	0	0	0	0	0	0	0	0	0	0	0	0	0	0	0
A_ASV00935	Archaea	Crenarchaeota	Bathyarchaeia	Un_Bathyarchaeia	Un_Bathyarchaeia	Un_Bathyarchaeia	Un_Bathyarchaeia		0	0	0	0	0	0	0	0	0	0	0	0	0	0	0	0	0	0	0	0	0	0	0	0	0	0	0	0	0	0	0	0	0	0	0	179	0	0	0	0	0
A_ASV00933	Archaea	Nanoarchaeota	Nanoarchaeia	Woesearchaeales	Un_Woesearchaeales	Un_Woesearchaeales	Un_Woesearchaeales		0	0	0	0	0	0	0	0	0	73	38	29	27	0	0	6	0	0	0	0	0	0	0	0	0	0	0	6	0	0	0	0	0	0	0	0	0	0	0	0	0
A_ASV00941	Archaea	Crenarchaeota	Bathyarchaeia	Un_Bathyarchaeia	Un_Bathyarchaeia	Un_Bathyarchaeia	Un_Bathyarchaeia		0	0	0	0	0	0	0	0	0	0	0	0	0	0	0	0	0	0	0	0	0	0	0	0	0	0	0	0	0	0	0	0	0	0	0	178	0	0	0	0	0
A_ASV00940	Archaea	Halobacterota	Methanomicrobia	Methanomicrobiales	Methanomicrobiaceae	Un_Methanomicrobiaceae	Un_Methanomicrobiaceae		0	0	0	0	0	0	0	0	0	0	0	0	0	0	0	0	0	0	0	0	0	0	0	0	0	0	0	0	0	0	0	0	0	0	0	178	0	0	0	0	0
A_ASV00938	Archaea	Nanoarchaeota	Nanoarchaeia	Woesearchaeales	Un_Woesearchaeales	Un_Woesearchaeales	Un_Woesearchaeales		0	0	0	9	0	17	0	43	0	0	0	0	0	0	32	0	39	38	0	0	0	0	0	0	0	0	0	0	0	0	0	0	0	0	0	0	0	0	0	0	0
A_ASV00939	Archaea	Nanoarchaeota	Nanoarchaeia	Woesearchaeales	Un_Woesearchaeales	Un_Woesearchaeales	Un_Woesearchaeales		0	0	0	0	0	0	0	0	0	0	0	0	0	0	0	0	0	0	60	0	0	0	0	0	0	0	0	19	0	31	26	18	24	0	0	0	0	0	0	0	0
A_ASV00947	Archaea	Crenarchaeota	Bathyarchaeia	Un_Bathyarchaeia	Un_Bathyarchaeia	Un_Bathyarchaeia	Un_Bathyarchaeia		0	0	0	0	0	0	0	0	0	0	0	0	0	0	0	0	0	0	0	0	0	0	0	0	0	0	0	0	0	0	0	0	0	0	0	0	0	0	0	0	77
A_ASV00942	Archaea	Crenarchaeota	Nitrososphaeria	Nitrosopumilales	Nitrosopumilaceae	Candidatus Nitrosopumilus	Un_Candidatus Nitrosopumilus		0	98	79	0	0	0	0	0	0	0	0	0	0	0	0	0	0	0	0	0	0	0	0	0	0	0	0	0	0	0	0	0	0	0	0	0	0	0	0	0	0
A_ASV00946	Archaea	Crenarchaeota	Nitrososphaeria	Nitrosopumilales	Nitrosopumilaceae	Un_Nitrosopumilaceae	Un_Nitrosopumilaceae		0	0	0	0	0	0	0	0	0	0	0	0	0	0	0	0	0	0	0	0	0	0	0	0	0	0	0	0	0	0	0	0	0	0	0	151	0	0	0	0	0
A_ASV00945	Archaea	Euryarchaeota	Methanobacteria	Methanobacteriales	Methanobacteriaceae	Methanobacterium	congolense		0	0	0	0	0	0	0	0	0	0	0	0	0	0	0	0	0	0	0	0	0	0	0	0	0	0	0	0	0	0	0	0	0	0	177	0	0	0	0	0	0
A_ASV00943	Archaea	Thermoplasmatota	Thermoplasmata	Marine Benthic Group D and DHVEG-1	Un_Marine Benthic Group D and DHVEG-1	Un_Marine Benthic Group D and DHVEG-1	Un_Marine Benthic Group D and DHVEG-1		0	0	0	0	0	0	0	0	0	0	0	0	0	0	0	32	0	0	0	0	0	0	0	0	0	0	0	0	0	0	0	0	0	145	0	0	0	0	0	0	0
A_ASV00949	Archaea	Crenarchaeota	Bathyarchaeia	Un_Bathyarchaeia	Un_Bathyarchaeia	Un_Bathyarchaeia	Un_Bathyarchaeia		0	0	0	0	53	0	59	0	0	0	0	0	0	0	0	0	0	0	0	0	0	0	0	0	0	0	0	39	0	0	0	0	0	0	0	25	0	0	0	0	0
A_ASV00951	Archaea	Crenarchaeota	Bathyarchaeia	Un_Bathyarchaeia	Un_Bathyarchaeia	Un_Bathyarchaeia	Un_Bathyarchaeia		0	0	0	0	0	0	0	0	0	0	0	0	0	0	0	0	0	0	0	0	0	176	0	0	0	0	0	0	0	0	0	0	0	0	0	0	0	0	0	0	0
A_ASV00950	Archaea	Crenarchaeota	Nitrososphaeria	Nitrosopumilales	Nitrosopumilaceae	Candidatus Nitrosopumilus	Un_Candidatus Nitrosopumilus		0	0	0	0	0	0	0	0	0	0	0	0	0	0	0	0	0	0	0	176	0	0	0	0	0	0	0	0	0	0	0	0	0	0	0	0	0	0	0	0	0
A_ASV00952	Archaea	Crenarchaeota	Bathyarchaeia	Un_Bathyarchaeia	Un_Bathyarchaeia	Un_Bathyarchaeia	Un_Bathyarchaeia		0	0	0	0	0	0	38	0	0	0	0	0	0	0	0	0	0	0	0	0	0	0	0	0	0	0	0	0	0	0	0	0	0	0	0	0	0	0	0	0	0
A_ASV00953	Archaea	Crenarchaeota	Bathyarchaeia	Un_Bathyarchaeia	Un_Bathyarchaeia	Un_Bathyarchaeia	Un_Bathyarchaeia		0	0	0	0	0	0	0	0	0	0	0	0	0	0	0	0	0	0	0	0	0	0	0	0	0	0	0	0	0	0	0	0	0	0	0	0	0	0	0	0	0
A_ASV00956	Archaea	Asgardarchaeota	Lokiarchaeia	Lokiarchaeia	Lokiarchaeia	Lokiarchaeia	Lokiarchaeia		0	0	0	0	0	0	36	87	0	0	0	0	0	0	0	0	0	0	0	0	0	0	0	0	0	0	0	0	0	0	0	0	0	0	0	0	0	0	0	0	51
A_ASV00955	Archaea	Thermoplasmatota	Thermoplasmata	Marine Benthic Group D and DHVEG-1	Un_Marine Benthic Group D and DHVEG-1	Un_Marine Benthic Group D and DHVEG-1	Un_Marine Benthic Group D and DHVEG-1		0	0	0	0	0	0	94	0	0	0	0	0	0	0	0	0	0	0	0	0	0	0	0	0	0	0	0	0	0	0	0	0	0	0	0	0	0	0	0	0	80
A_ASV00957	Archaea	Thermoplasmatota	Thermoplasmata	Marine Benthic Group D and DHVEG-1	Un_Marine Benthic Group D and DHVEG-1	Un_Marine Benthic Group D and DHVEG-1	Un_Marine Benthic Group D and DHVEG-1		0	0	0	0	0	0	0	0	0	0	0	0	0	0	0	0	0	0	0	0	0	0	0	0	0	0	0	0	0	0	0	0	0	174	0	0	0	0	0	0	0
A_ASV00961	Archaea	Crenarchaeota	Bathyarchaeia	Un_Bathyarchaeia	Un_Bathyarchaeia	Un_Bathyarchaeia	Un_Bathyarchaeia		0	0	0	0	0	0	0	0	0	0	0	0	0	0	0	0	0	0	0	0	0	0	0	0	0	0	0	0	0	0	0	0	0	0	0	0	0	0	0	0	39
A_ASV00960	Archaea	Un_Archaea	Un_Archaea	Un_Archaea	Un_Archaea	Un_Archaea	Un_Archaea		0	0	0	0	0	0	0	0	0	0	0	0	0	0	0	0	0	0	0	0	0	0	0	0	0	0	0	0	0	0	0	0	0	0	173	0	0	0	0	0	0
A_ASV00962	Archaea	Crenarchaeota	Bathyarchaeia	Un_Bathyarchaeia	Un_Bathyarchaeia	Un_Bathyarchaeia	Un_Bathyarchaeia		0	0	0	0	32	0	0	0	0	0	0	0	0	0	0	0	0	0	34	0	0	0	0	0	0	0	0	0	0	0	0	0	0	0	0	0	0	0	0	87	0
A_ASV00963	Archaea	Crenarchaeota	Bathyarchaeia	Un_Bathyarchaeia	Un_Bathyarchaeia	Un_Bathyarchaeia	Un_Bathyarchaeia		0	0	0	0	0	0	0	32	41	0	0	0	0	0	0	0	0	0	0	0	0	0	0	0	0	0	0	0	0	0	0	0	0	0	0	99	0	0	0	0	0
A_ASV00968	Archaea	Crenarchaeota	Bathyarchaeia	Un_Bathyarchaeia	Un_Bathyarchaeia	Un_Bathyarchaeia	Un_Bathyarchaeia		0	0	0	0	0	0	0	0	0	0	0	0	0	0	0	0	0	0	0	0	0	0	0	0	0	0	0	47	0	0	66	58	0	0	0	0	0	0	0	0	0
A_ASV00969	Archaea	Crenarchaeota	Bathyarchaeia	Un_Bathyarchaeia	Un_Bathyarchaeia	Un_Bathyarchaeia	Un_Bathyarchaeia		0	0	0	0	0	0	0	0	0	0	0	0	0	0	0	0	0	0	0	0	0	0	0	0	0	0	0	0	0	0	0	0	0	0	0	171	0	0	0	0	0
A_ASV00967	Archaea	Un_Archaea	Un_Archaea	Un_Archaea	Un_Archaea	Un_Archaea	Un_Archaea		0	45	0	0	0	0	12	0	23	0	0	0	21	9	0	0	0	0	0	0	0	0	0	0	0	0	0	12	0	0	0	14	0	0	0	0	0	0	0	0	0
A_ASV00974	Archaea	Crenarchaeota	Bathyarchaeia	Un_Bathyarchaeia	Un_Bathyarchaeia	Un_Bathyarchaeia	Un_Bathyarchaeia		0	0	0	0	0	0	0	0	0	0	0	0	0	0	0	0	0	0	0	0	0	0	0	0	0	0	0	0	0	0	0	0	0	0	0	0	0	0	0	65	53
A_ASV00972	Archaea	Crenarchaeota	Nitrososphaeria	Caldiarchaeales	Caldiarchaeaceae	Candidatus Caldiarchaeum	Un_Candidatus Caldiarchaeum		0	0	0	0	0	0	0	0	0	0	0	0	0	0	0	0	0	0	0	0	0	0	0	0	0	0	170	0	0	0	0	0	0	0	0	0	0	0	0	0	0
A_ASV00970	Archaea	Thermoplasmatota	Thermoplasmata	SG8-5	Un_SG8-5	Un_SG8-5	Un_SG8-5		0	0	0	44	0	0	0	0	0	0	0	0	0	0	0	39	0	67	0	0	0	0	0	0	0	0	0	0	11	0	0	0	0	0	0	0	0	0	0	0	0
A_ASV00977	Archaea	Aenigmarchaeota	Un_Aenigmarchaeota	Un_Aenigmarchaeota	Un_Aenigmarchaeota	Un_Aenigmarchaeota	Un_Aenigmarchaeota		0	0	0	0	0	0	0	0	0	0	0	0	0	0	0	0	0	0	0	0	0	0	0	0	0	0	0	0	0	0	0	0	0	0	0	169	0	0	0	0	0
A_ASV00976	Archaea	Thermoplasmatota	Thermoplasmata	Marine Benthic Group D and DHVEG-1	Un_Marine Benthic Group D and DHVEG-1	Un_Marine Benthic Group D and DHVEG-1	Un_Marine Benthic Group D and DHVEG-1		0	0	0	0	0	0	0	0	0	0	0	0	0	0	0	0	0	0	0	0	0	0	0	0	0	0	0	0	0	0	0	0	0	0	0	169	0	0	0	0	0
A_ASV00981	Archaea	Crenarchaeota	Bathyarchaeia	Un_Bathyarchaeia	Un_Bathyarchaeia	Un_Bathyarchaeia	Un_Bathyarchaeia		0	0	0	0	0	0	0	0	0	0	0	0	0	0	0	0	0	0	0	0	0	0	0	0	0	0	0	0	0	0	0	0	44	52	0	72	0	0	0	0	0
A_ASV00982	Archaea	Crenarchaeota	Bathyarchaeia	Un_Bathyarchaeia	Un_Bathyarchaeia	Un_Bathyarchaeia	Un_Bathyarchaeia		0	0	0	0	0	0	0	0	0	0	0	0	0	0	0	0	0	0	0	0	0	0	0	0	0	0	0	0	0	0	0	0	0	0	168	0	0	0	0	0	0
A_ASV00979	Archaea	Thermoplasmatota	Thermoplasmata	Un_Thermoplasmata	Un_Thermoplasmata	Un_Thermoplasmata	Un_Thermoplasmata		0	0	0	0	37	0	39	0	0	0	0	0	0	0	0	0	0	0	0	0	0	0	0	0	0	0	0	0	0	21	0	0	0	0	0	0	0	0	0	0	55
A_ASV00989	Archaea	Crenarchaeota	Bathyarchaeia	Un_Bathyarchaeia	Un_Bathyarchaeia	Un_Bathyarchaeia	Un_Bathyarchaeia		0	0	0	0	0	0	0	0	0	0	0	0	0	0	0	0	0	0	0	0	0	0	0	0	167	0	0	0	0	0	0	0	0	0	0	0	0	0	0	0	0
A_ASV00988	Archaea	Crenarchaeota	Bathyarchaeia	Un_Bathyarchaeia	Un_Bathyarchaeia	Un_Bathyarchaeia	Un_Bathyarchaeia		0	0	0	0	0	0	0	0	0	0	0	0	0	0	0	0	0	0	0	0	0	0	0	167	0	0	0	0	0	0	0	0	0	0	0	0	0	0	0	0	0
A_ASV00992	Archaea	Asgardarchaeota	Lokiarchaeia	Lokiarchaeia	Lokiarchaeia	Lokiarchaeia	Lokiarchaeia		0	0	0	0	0	0	0	0	0	0	0	0	0	0	0	0	0	0	0	0	0	0	0	0	0	0	0	0	0	0	0	0	0	0	0	0	0	0	0	0	0
A_ASV00990	Archaea	Thermoplasmatota	Thermoplasmata	Marine Benthic Group D and DHVEG-1	Un_Marine Benthic Group D and DHVEG-1	Un_Marine Benthic Group D and DHVEG-1	Un_Marine Benthic Group D and DHVEG-1		0	0	0	0	0	0	0	0	0	0	0	0	0	0	0	29	0	0	0	0	0	0	0	0	0	0	0	0	45	0	26	36	0	30	0	0	0	0	0	0	0
A_ASV00996	Archaea	Crenarchaeota	Bathyarchaeia	Un_Bathyarchaeia	Un_Bathyarchaeia	Un_Bathyarchaeia	Un_Bathyarchaeia		0	0	0	0	0	0	87	0	78	0	0	0	0	0	0	0	0	0	0	0	0	0	0	0	0	0	0	0	0	0	0	0	0	0	0	0	0	0	0	0	0
A_ASV00997	Archaea	Un_Archaea	Un_Archaea	Un_Archaea	Un_Archaea	Un_Archaea	Un_Archaea		0	0	0	0	0	0	0	0	0	0	0	0	0	0	0	0	0	0	0	165	0	0	0	0	0	0	0	0	0	0	0	0	0	0	0	0	0	0	0	0	0
A_ASV00999	Archaea	Un_Archaea	Un_Archaea	Un_Archaea	Un_Archaea	Un_Archaea	Un_Archaea		0	0	0	0	0	0	0	0	0	0	0	0	0	0	0	0	0	0	0	0	0	0	0	0	0	0	0	0	0	0	0	0	0	0	0	165	0	0	0	0	0
A_ASV00994	Archaea	Nanoarchaeota	Nanoarchaeia	Woesearchaeales	Un_Woesearchaeales	Un_Woesearchaeales	Un_Woesearchaeales		25	53	36	0	0	0	0	0	0	0	0	0	0	0	0	0	0	0	0	0	0	0	0	0	0	0	0	0	0	0	0	0	0	0	0	0	26	0	25	0	0
A_ASV01001	Archaea	Nanoarchaeota	Nanoarchaeia	Woesearchaeales	Un_Woesearchaeales	Un_Woesearchaeales	Un_Woesearchaeales		0	0	0	0	0	0	0	0	0	0	0	0	0	0	0	0	0	0	0	0	0	0	0	0	0	0	0	0	0	0	0	0	0	0	0	0	0	83	82	0	0
A_ASV01002	Archaea	Crenarchaeota	Bathyarchaeia	Un_Bathyarchaeia	Un_Bathyarchaeia	Un_Bathyarchaeia	Un_Bathyarchaeia		0	0	15	0	0	0	0	77	0	0	0	0	71	0	0	0	0	0	0	0	0	0	0	0	0	0	0	0	0	0	0	0	0	0	0	0	0	0	0	0	0
A_ASV01008	Archaea	Crenarchaeota	Bathyarchaeia	Un_Bathyarchaeia	Un_Bathyarchaeia	Un_Bathyarchaeia	Un_Bathyarchaeia		0	0	0	0	0	0	0	0	0	0	0	0	0	0	0	0	0	0	0	0	0	0	0	133	0	0	0	0	0	0	0	0	0	0	0	0	0	0	0	0	0
A_ASV01004	Archaea	Crenarchaeota	Nitrososphaeria	Nitrosopumilales	Nitrosopumilaceae	Candidatus Nitrosopumilus	Un_Candidatus Nitrosopumilus		0	0	0	0	0	0	0	0	0	27	0	0	0	136	0	0	0	0	0	0	0	0	0	0	0	0	0	0	0	0	0	0	0	0	0	0	0	0	0	0	0
A_ASV01007	Archaea	Crenarchaeota	Nitrososphaeria	Nitrosopumilales	Nitrosopumilaceae	Candidatus Nitrosopumilus	Un_Candidatus Nitrosopumilus		0	0	0	0	0	0	0	0	0	0	0	0	0	0	0	0	0	0	0	0	0	0	0	163	0	0	0	0	0	0	0	0	0	0	0	0	0	0	0	0	0
A_ASV01003	Archaea	Nanoarchaeota	Nanoarchaeia	Woesearchaeales	Un_Woesearchaeales	Un_Woesearchaeales	Un_Woesearchaeales		0	0	0	0	0	16	0	0	0	0	15	0	52	16	35	0	29	0	0	0	0	0	0	0	0	0	0	0	0	0	0	0	0	0	0	0	0	0	0	0	0
A_ASV01012	Archaea	Crenarchaeota	Bathyarchaeia	Un_Bathyarchaeia	Un_Bathyarchaeia	Un_Bathyarchaeia	Un_Bathyarchaeia		0	0	0	0	0	0	0	0	0	0	0	0	0	0	66	0	0	74	0	0	0	0	0	0	0	0	0	0	22	0	0	0	0	0	0	0	0	0	0	0	0
A_ASV01014	Archaea	Crenarchaeota	Bathyarchaeia	Un_Bathyarchaeia	Un_Bathyarchaeia	Un_Bathyarchaeia	Un_Bathyarchaeia		0	0	0	0	0	0	0	0	0	0	0	0	0	0	0	0	0	0	0	0	0	0	0	0	0	0	0	0	0	0	0	0	0	0	0	162	0	0	0	0	0
A_ASV01013	Archaea	Un_Archaea	Un_Archaea	Un_Archaea	Un_Archaea	Un_Archaea	Un_Archaea		0	0	0	0	0	0	0	0	0	0	0	0	0	0	0	0	0	0	0	0	0	0	0	0	0	0	0	0	0	0	0	0	0	0	162	0	0	0	0	0	0
A_ASV01009	Archaea	Thermoplasmatota	Thermoplasmata	Marine Benthic Group D and DHVEG-1	Un_Marine Benthic Group D and DHVEG-1	Un_Marine Benthic Group D and DHVEG-1	Un_Marine Benthic Group D and DHVEG-1		0	0	0	0	0	0	48	0	114	0	0	0	0	0	0	0	0	0	0	0	0	0	0	0	0	0	0	0	0	0	0	0	0	0	0	0	0	0	0	0	0
A_ASV01017	Archaea	Crenarchaeota	Bathyarchaeia	Un_Bathyarchaeia	Un_Bathyarchaeia	Un_Bathyarchaeia	Un_Bathyarchaeia		0	0	0	0	0	0	29	0	0	0	0	26	0	0	0	0	0	0	0	0	0	0	0	0	0	0	0	0	0	0	0	0	0	0	0	0	0	0	0	0	0
A_ASV01022	Archaea	Crenarchaeota	Bathyarchaeia	Un_Bathyarchaeia	Un_Bathyarchaeia	Un_Bathyarchaeia	Un_Bathyarchaeia		0	0	0	0	0	0	0	0	0	0	0	0	0	0	0	0	0	0	0	0	0	0	0	0	0	0	0	0	0	0	0	0	0	0	0	0	0	0	0	0	0
A_ASV01018	Archaea	Crenarchaeota	Nitrososphaeria	Nitrosopumilales	Nitrosopumilaceae	Candidatus Nitrosopumilus	Un_Candidatus Nitrosopumilus		0	0	0	0	0	0	0	0	0	0	0	0	0	0	0	0	0	0	0	161	0	0	0	0	0	0	0	0	0	0	0	0	0	0	0	0	0	0	0	0	0
A_ASV01021	Archaea	Nanoarchaeota	Nanoarchaeia	Woesearchaeales	Un_Woesearchaeales	Un_Woesearchaeales	Un_Woesearchaeales		0	0	0	0	0	0	0	0	0	0	0	0	0	0	0	0	0	0	0	0	0	0	0	0	0	0	0	0	0	0	0	0	0	161	0	0	0	0	0	0	0
A_ASV01015	Archaea	Thermoplasmatota	Thermoplasmata	Marine Group II	Un_Marine Group II	Un_Marine Group II	Un_Marine Group II		46	0	27	0	0	0	0	0	0	0	0	0	0	0	0	0	0	0	0	0	0	0	0	0	0	0	0	0	0	0	0	0	0	0	0	0	0	88	0	0	0
A_ASV01023	Archaea	Crenarchaeota	Bathyarchaeia	Un_Bathyarchaeia	Un_Bathyarchaeia	Un_Bathyarchaeia	Un_Bathyarchaeia		0	0	0	7	0	21	0	23	0	0	0	21	0	0	0	28	29	0	0	0	0	0	0	0	0	0	0	0	0	0	0	0	31	0	0	0	0	0	0	0	0
A_ASV01025	Archaea	Crenarchaeota	Bathyarchaeia	Un_Bathyarchaeia	Un_Bathyarchaeia	Un_Bathyarchaeia	Un_Bathyarchaeia		0	0	0	0	0	0	0	0	31	0	0	0	0	0	0	67	0	62	0	0	0	0	0	0	0	0	0	0	0	0	0	0	0	0	0	0	0	0	0	0	0
A_ASV01024	Archaea	Crenarchaeota	Bathyarchaeia	Un_Bathyarchaeia	Un_Bathyarchaeia	Un_Bathyarchaeia	Un_Bathyarchaeia		0	0	0	0	30	0	0	62	60	0	0	0	0	0	0	0	0	0	0	0	0	0	0	0	0	0	0	0	0	0	0	0	0	0	0	0	0	0	0	0	0
A_ASV01026	Archaea	Nanoarchaeota	Nanoarchaeia	Woesearchaeales	Un_Woesearchaeales	Un_Woesearchaeales	Un_Woesearchaeales		0	0	0	0	0	0	0	0	0	0	24	35	49	22	0	0	0	0	0	0	0	0	0	0	0	0	0	0	30	0	0	0	0	0	0	0	0	0	0	0	0
A_ASV01029	Archaea	Crenarchaeota	Bathyarchaeia	Un_Bathyarchaeia	Un_Bathyarchaeia	Un_Bathyarchaeia	Un_Bathyarchaeia		0	159	0	0	0	0	0	0	0	0	0	0	0	0	0	0	0	0	0	0	0	0	0	0	0	0	0	0	0	0	0	0	0	0	0	0	0	0	0	0	0
A_ASV01032	Archaea	Crenarchaeota	Bathyarchaeia	Un_Bathyarchaeia	Un_Bathyarchaeia	Un_Bathyarchaeia	Un_Bathyarchaeia		0	0	0	0	0	0	0	0	0	0	0	0	0	0	0	0	0	0	0	0	0	0	0	0	0	0	0	0	0	0	0	0	0	0	159	0	0	0	0	0	0
A_ASV01035	Archaea	Crenarchaeota	Bathyarchaeia	Un_Bathyarchaeia	Un_Bathyarchaeia	Un_Bathyarchaeia	Un_Bathyarchaeia		0	0	0	0	38	0	0	0	19	0	0	0	0	0	0	0	0	7	0	0	0	0	0	0	0	0	0	0	0	0	0	0	0	0	0	94	0	0	0	0	0
A_ASV01039	Archaea	Crenarchaeota	Bathyarchaeia	Un_Bathyarchaeia	Un_Bathyarchaeia	Un_Bathyarchaeia	Un_Bathyarchaeia		0	0	0	0	0	0	0	0	0	0	0	0	0	0	0	0	0	0	0	0	0	0	0	0	0	0	0	0	0	0	0	0	0	0	0	158	0	0	0	0	0
A_ASV01038	Archaea	Halobacterota	Methanomicrobia	Methanomicrobiales	Methanomicrobiaceae	Methanogenium	Un_Methanogenium		0	0	0	0	0	0	0	0	0	0	0	0	0	0	0	0	0	0	0	0	0	0	0	0	0	0	0	0	0	0	0	0	0	0	158	0	0	0	0	0	0
A_ASV01037	Archaea	Nanoarchaeota	Nanoarchaeia	Woesearchaeales	Un_Woesearchaeales	Un_Woesearchaeales	Un_Woesearchaeales		0	0	0	0	0	0	0	0	0	0	0	0	0	0	0	0	0	0	72	0	0	0	0	0	0	0	0	0	0	0	0	0	0	0	0	0	0	0	0	0	53
A_ASV01036	Archaea	Nanoarchaeota	Nanoarchaeia	Woesearchaeales	Un_Woesearchaeales	Un_Woesearchaeales	Un_Woesearchaeales		0	0	0	0	0	0	0	0	0	0	0	0	0	0	27	0	0	0	53	0	0	0	0	0	0	0	0	16	56	6	0	0	0	0	0	0	0	0	0	0	0
A_ASV01041	Archaea	Crenarchaeota	Bathyarchaeia	Un_Bathyarchaeia	Un_Bathyarchaeia	Un_Bathyarchaeia	Un_Bathyarchaeia		0	0	0	22	0	0	0	0	39	0	0	0	0	0	0	0	0	0	0	0	0	0	0	0	0	0	0	0	0	0	0	0	0	0	0	0	0	0	0	0	53
A_ASV01042	Archaea	Crenarchaeota	Bathyarchaeia	Un_Bathyarchaeia	Un_Bathyarchaeia	Un_Bathyarchaeia	Un_Bathyarchaeia		0	0	0	0	0	0	46	50	0	0	0	0	0	0	0	0	0	0	0	0	0	0	0	0	0	0	0	0	0	0	0	0	0	0	0	0	0	0	0	0	0
A_ASV01044	Archaea	Crenarchaeota	Bathyarchaeia	Un_Bathyarchaeia	Un_Bathyarchaeia	Un_Bathyarchaeia	Un_Bathyarchaeia		0	0	0	0	0	0	0	0	0	0	0	0	72	0	0	0	0	0	0	0	0	0	0	0	0	0	0	0	0	0	0	0	0	0	0	0	0	0	0	0	0
A_ASV01046	Archaea	Crenarchaeota	Nitrososphaeria	Nitrosopumilales	Nitrosopumilaceae	Candidatus Nitrosopumilus	Un_Candidatus Nitrosopumilus		0	0	0	0	0	0	0	0	0	0	0	0	0	0	0	0	0	0	0	0	0	0	0	0	157	0	0	0	0	0	0	0	0	0	0	0	0	0	0	0	0
A_ASV01047	Archaea	Halobacterota	Methanomicrobia	Methanomicrobiales	Methanomicrobiaceae	Methanogenium	Un_Methanogenium		0	0	0	0	0	0	0	0	0	0	0	0	0	0	0	0	0	0	0	0	0	0	0	0	0	0	0	0	0	0	0	0	0	0	157	0	0	0	0	0	0
A_ASV01043	Archaea	Nanoarchaeota	Nanoarchaeia	Woesearchaeales	SCGC AAA286-E23	Un_SCGC AAA286-E23	Un_SCGC AAA286-E23		0	0	0	0	0	0	0	0	0	69	39	0	0	0	0	25	0	0	24	0	0	0	0	0	0	0	0	0	0	0	0	0	0	0	0	0	0	0	0	0	0
A_ASV01056	Archaea	Asgardarchaeota	Un_Asgardarchaeota	Un_Asgardarchaeota	Un_Asgardarchaeota	Un_Asgardarchaeota	Un_Asgardarchaeota		0	0	0	0	0	0	0	0	0	0	0	0	0	0	0	0	0	0	0	0	0	0	0	0	0	0	0	0	0	0	0	0	0	0	0	156	0	0	0	0	0
A_ASV01051	Archaea	Asgardarchaeota	Odinarchaeia	Un_Odinarchaeia	Un_Odinarchaeia	Un_Odinarchaeia	Un_Odinarchaeia		0	0	0	0	0	0	0	0	0	18	0	0	17	0	0	0	0	0	0	0	0	0	0	0	0	0	0	0	0	0	0	0	0	44	0	0	0	6	0	0	0
A_ASV01055	Archaea	Crenarchaeota	Bathyarchaeia	Un_Bathyarchaeia	Un_Bathyarchaeia	Un_Bathyarchaeia	Un_Bathyarchaeia		0	0	0	0	0	0	0	0	0	0	0	0	0	0	0	0	0	0	0	0	0	0	0	0	0	0	0	0	0	0	0	0	0	0	0	156	0	0	0	0	0
A_ASV01052	Archaea	Crenarchaeota	Bathyarchaeia	Un_Bathyarchaeia	Un_Bathyarchaeia	Un_Bathyarchaeia	Un_Bathyarchaeia		0	0	0	0	0	0	0	0	0	0	0	0	0	0	0	0	0	0	0	0	0	0	0	156	0	0	0	0	0	0	0	0	0	0	0	0	0	0	0	0	0
A_ASV01054	Archaea	Crenarchaeota	Bathyarchaeia	Un_Bathyarchaeia	Un_Bathyarchaeia	Un_Bathyarchaeia	Un_Bathyarchaeia		0	0	0	0	0	0	0	0	0	0	0	0	0	0	0	0	0	0	0	0	0	0	0	0	0	0	0	0	0	0	0	0	0	0	156	0	0	0	0	0	0
A_ASV01057	Archaea	Crenarchaeota	Bathyarchaeia	Un_Bathyarchaeia	Un_Bathyarchaeia	Un_Bathyarchaeia	Un_Bathyarchaeia		0	0	0	0	0	0	0	0	0	0	0	0	0	0	0	0	0	0	0	0	0	0	0	0	0	0	0	0	0	0	0	0	0	0	0	101	0	0	0	55	0
A_ASV01053	Archaea	Thermoplasmatota	Thermoplasmata	Marine Benthic Group D and DHVEG-1	Un_Marine Benthic Group D and DHVEG-1	Un_Marine Benthic Group D and DHVEG-1	Un_Marine Benthic Group D and DHVEG-1		0	0	0	0	0	0	0	0	0	0	0	0	0	0	0	0	0	0	0	0	0	0	0	0	0	0	0	0	0	0	0	0	0	0	156	0	0	0	0	0	0
A_ASV01049	Archaea	Thermoplasmatota	Thermoplasmata	Un_Thermoplasmata	Un_Thermoplasmata	Un_Thermoplasmata	Un_Thermoplasmata		15	0	0	0	0	0	0	0	10	0	0	0	48	17	13	11	15	13	0	0	0	0	0	0	0	0	0	0	0	0	14	0	0	0	0	0	0	0	0	0	0
A_ASV01059	Archaea	Asgardarchaeota	Un_Asgardarchaeota	Un_Asgardarchaeota	Un_Asgardarchaeota	Un_Asgardarchaeota	Un_Asgardarchaeota		0	0	0	69	0	0	0	0	0	0	0	0	0	0	0	0	0	27	0	0	0	0	0	0	0	0	0	0	0	59	0	0	0	0	0	0	0	0	0	0	0
A_ASV01060	Archaea	Crenarchaeota	Bathyarchaeia	Un_Bathyarchaeia	Un_Bathyarchaeia	Un_Bathyarchaeia	Un_Bathyarchaeia		0	0	0	0	0	0	0	0	0	0	0	0	0	0	0	0	0	0	0	0	0	0	0	0	0	0	155	0	0	0	0	0	0	0	0	0	0	0	0	0	0
A_ASV01066	Archaea	Asgardarchaeota	Lokiarchaeia	Lokiarchaeia	Lokiarchaeia	Lokiarchaeia	Lokiarchaeia		0	0	0	0	0	0	0	0	0	0	0	0	0	0	0	0	0	0	0	0	0	0	0	0	0	0	154	0	0	0	0	0	0	0	0	0	0	0	0	0	0
A_ASV01063	Archaea	Crenarchaeota	Bathyarchaeia	Un_Bathyarchaeia	Un_Bathyarchaeia	Un_Bathyarchaeia	Un_Bathyarchaeia		0	0	0	0	17	0	0	0	0	0	0	0	0	0	0	0	0	0	0	0	0	0	0	0	0	0	0	0	0	0	0	0	0	0	0	72	0	0	0	0	0
A_ASV01072	Archaea	Crenarchaeota	Bathyarchaeia	Un_Bathyarchaeia	Un_Bathyarchaeia	Un_Bathyarchaeia	Un_Bathyarchaeia		0	0	0	0	0	0	0	0	0	0	43	0	0	0	0	0	36	74	0	0	0	0	0	0	0	0	0	0	0	0	0	0	0	0	0	0	0	0	0	0	0
A_ASV01074	Archaea	Crenarchaeota	Bathyarchaeia	Un_Bathyarchaeia	Un_Bathyarchaeia	Un_Bathyarchaeia	Un_Bathyarchaeia		0	0	0	0	0	0	0	0	0	0	0	0	0	0	0	0	0	0	0	0	0	0	0	0	0	153	0	0	0	0	0	0	0	0	0	0	0	0	0	0	0
A_ASV01075	Archaea	Crenarchaeota	Bathyarchaeia	Un_Bathyarchaeia	Un_Bathyarchaeia	Un_Bathyarchaeia	Un_Bathyarchaeia		0	0	0	0	0	0	0	0	0	0	0	0	0	0	0	0	0	0	0	0	0	0	0	0	0	0	153	0	0	0	0	0	0	0	0	0	0	0	0	0	0
A_ASV01076	Archaea	Halobacterota	Methanosarcinia	Methanosarciniales	Methanosarcinaceae	Methanosarcina	Un_Methanosarcina		0	0	0	0	0	0	0	0	0	0	0	0	0	0	0	0	0	0	0	0	0	0	0	0	0	0	0	0	0	0	0	0	0	0	0	153	0	0	0	0	0
A_ASV01067	Archaea	Nanoarchaeota	Nanoarchaeia	Woesearchaeales	Un_Woesearchaeales	Un_Woesearchaeales	Un_Woesearchaeales		0	0	0	30	0	0	0	0	0	14	0	0	49	0	23	37	0	0	0	0	0	0	0	0	0	0	0	0	0	0	0	0	0	0	0	0	0	0	0	0	0
A_ASV01068	Archaea	Thermoplasmatota	Thermoplasmata	Marine Benthic Group D and DHVEG-1	Un_Marine Benthic Group D and DHVEG-1	Un_Marine Benthic Group D and DHVEG-1	Un_Marine Benthic Group D and DHVEG-1		0	0	0	0	27	0	0	0	0	0	0	0	0	0	0	0	0	0	0	0	0	0	0	0	0	0	0	0	0	0	0	0	0	126	0	0	0	0	0	0	0
A_ASV01069	Archaea	Thermoplasmatota	Thermoplasmata	Marine Benthic Group D and DHVEG-1	Un_Marine Benthic Group D and DHVEG-1	Un_Marine Benthic Group D and DHVEG-1	Un_Marine Benthic Group D and DHVEG-1		0	0	0	0	0	0	0	17	0	0	0	46	0	0	0	0	26	0	0	0	0	0	0	0	0	0	0	0	0	0	0	0	0	59	0	0	5	0	0	0	0
A_ASV01071	Archaea	Thermoplasmatota	Thermoplasmata	Marine Benthic Group D and DHVEG-1	Un_Marine Benthic Group D and DHVEG-1	Un_Marine Benthic Group D and DHVEG-1	Un_Marine Benthic Group D and DHVEG-1		0	0	0	0	0	0	0	0	153	0	0	0	0	0	0	0	0	0	0	0	0	0	0	0	0	0	0	0	0	0	0	0	0	0	0	0	0	0	0	0	0
A_ASV01078	Archaea	Asgardarchaeota	Lokiarchaeia	Lokiarchaeia	Lokiarchaeia	Lokiarchaeia	Lokiarchaeia		0	0	0	0	0	0	17	0	0	0	0	0	0	0	0	0	0	0	0	0	0	0	0	0	0	0	0	0	0	0	0	0	0	0	0	0	0	0	0	0	0
A_ASV01077	Archaea	Euryarchaeota	Thermococci	Methanofastidiosales	Un_Methanofastidiosales	Un_Methanofastidiosales	Un_Methanofastidiosales		0	0	0	0	0	18	0	0	0	0	0	0	0	0	0	0	26	20	0	0	0	0	0	0	0	0	0	0	0	0	0	0	0	0	88	0	0	0	0	0	0
A_ASV01079	Archaea	Thermoplasmatota	Thermoplasmata	Marine Benthic Group D and DHVEG-1	Un_Marine Benthic Group D and DHVEG-1	Un_Marine Benthic Group D and DHVEG-1	Un_Marine Benthic Group D and DHVEG-1		0	0	0	0	0	0	0	0	0	0	0	0	0	0	0	0	0	0	0	0	0	0	0	0	0	0	152	0	0	0	0	0	0	0	0	0	0	0	0	0	0
A_ASV01083	Archaea	Asgardarchaeota	Lokiarchaeia	Lokiarchaeia	Lokiarchaeia	Lokiarchaeia	Lokiarchaeia		0	0	0	0	0	0	58	0	0	0	0	0	0	0	0	0	0	0	0	0	0	0	0	0	0	0	0	0	0	0	0	0	0	93	0	0	0	0	0	0	0
A_ASV01081	Archaea	Crenarchaeota	Bathyarchaeia	Un_Bathyarchaeia	Un_Bathyarchaeia	Un_Bathyarchaeia	Un_Bathyarchaeia		57	0	0	0	0	0	1	0	0	0	0	0	0	0	0	0	0	0	0	0	0	0	0	0	0	0	0	0	17	18	0	0	56	2	0	0	0	0	0	0	0
A_ASV01084	Archaea	Crenarchaeota	Bathyarchaeia	Un_Bathyarchaeia	Un_Bathyarchaeia	Un_Bathyarchaeia	Un_Bathyarchaeia		0	0	0	0	0	0	24	0	0	0	0	0	0	0	0	0	0	0	0	0	0	0	0	0	0	0	0	0	79	0	0	0	0	48	0	0	0	0	0	0	0
A_ASV01087	Archaea	Crenarchaeota	Nitrososphaeria	Nitrosopumilales	Nitrosopumilaceae	Un_Nitrosopumilaceae	Un_Nitrosopumilaceae		0	0	0	0	0	0	0	0	0	0	0	0	0	0	0	0	0	0	0	0	0	0	0	0	0	0	0	0	0	0	0	0	0	0	0	0	51	48	52	0	0
A_ASV01085	Archaea	Halobacterota	Methanocellia	Methanocellales	Un_Methanocellales	Un_Methanocellales	Un_Methanocellales		0	0	0	0	0	0	23	0	0	0	0	0	0	18	0	0	0	0	27	0	0	0	0	0	0	0	0	0	21	0	0	0	13	26	0	0	0	0	0	0	0
A_ASV01091	Archaea	Crenarchaeota	Bathyarchaeia	Un_Bathyarchaeia	Un_Bathyarchaeia	Un_Bathyarchaeia	Un_Bathyarchaeia		0	0	0	0	0	0	0	0	80	0	0	44	0	0	26	0	0	0	0	0	0	0	0	0	0	0	0	0	0	0	0	0	0	0	0	0	0	0	0	0	0
A_ASV01094	Archaea	Crenarchaeota	Bathyarchaeia	Un_Bathyarchaeia	Un_Bathyarchaeia	Un_Bathyarchaeia	Un_Bathyarchaeia		0	0	0	0	0	0	0	0	0	0	0	0	0	0	0	0	0	0	0	0	0	0	0	0	0	150	0	0	0	0	0	0	0	0	0	0	0	0	0	0	0
A_ASV01095	Archaea	Crenarchaeota	Bathyarchaeia	Un_Bathyarchaeia	Un_Bathyarchaeia	Un_Bathyarchaeia	Un_Bathyarchaeia		0	0	0	0	0	0	0	0	0	0	0	0	0	0	0	0	0	0	0	0	0	0	0	0	0	0	0	0	0	0	0	0	0	150	0	0	0	0	0	0	0
A_ASV01089	Archaea	Nanoarchaeota	Nanoarchaeia	Woesearchaeales	Un_Woesearchaeales	Un_Woesearchaeales	Un_Woesearchaeales		6	0	0	0	0	0	0	0	0	16	0	0	85	0	43	0	0	0	0	0	0	0	0	0	0	0	0	0	0	0	0	0	0	0	0	0	0	0	0	0	0
A_ASV01093	Archaea	Thermoplasmatota	Thermoplasmata	Marine Benthic Group D and DHVEG-1	Un_Marine Benthic Group D and DHVEG-1	Un_Marine Benthic Group D and DHVEG-1	Un_Marine Benthic Group D and DHVEG-1		0	0	0	0	0	0	0	0	0	0	0	0	0	0	27	33	0	0	0	0	0	0	0	0	0	0	0	0	0	0	0	43	47	0	0	0	0	0	0	0	0
A_ASV01099	Archaea	Asgardarchaeota	Odinarchaeia	Un_Odinarchaeia	Un_Odinarchaeia	Un_Odinarchaeia	Un_Odinarchaeia		0	0	0	0	0	0	0	43	0	0	0	0	0	0	0	0	0	0	0	0	0	0	0	0	0	0	0	36	27	0	0	0	0	0	0	43	0	0	0	0	0
A_ASV01100	Archaea	Crenarchaeota	Bathyarchaeia	Un_Bathyarchaeia	Un_Bathyarchaeia	Un_Bathyarchaeia	Un_Bathyarchaeia		0	0	0	0	0	0	0	0	42	0	0	0	0	0	0	0	0	0	0	0	0	0	0	0	0	0	0	0	0	0	0	0	0	0	0	71	0	0	0	0	0
A_ASV01101	Archaea	Crenarchaeota	Bathyarchaeia	Un_Bathyarchaeia	Un_Bathyarchaeia	Un_Bathyarchaeia	Un_Bathyarchaeia		0	0	0	0	0	0	0	0	1	0	0	0	0	0	93	0	0	0	0	0	0	0	0	0	0	0	0	0	0	0	0	0	0	0	0	0	0	0	0	0	0
A_ASV01106	Archaea	Crenarchaeota	Bathyarchaeia	Un_Bathyarchaeia	Un_Bathyarchaeia	Un_Bathyarchaeia	Un_Bathyarchaeia		0	0	0	0	0	0	0	0	0	0	0	0	0	0	0	0	0	0	0	0	0	0	0	0	149	0	0	0	0	0	0	0	0	0	0	0	0	0	0	0	0
A_ASV01098	Archaea	Un_Archaea	Un_Archaea	Un_Archaea	Un_Archaea	Un_Archaea	Un_Archaea		0	0	0	0	67	0	0	82	0	0	0	0	0	0	0	0	0	0	0	0	0	0	0	0	0	0	0	0	0	0	0	0	0	0	0	0	0	0	0	0	0
A_ASV01110	Archaea	Crenarchaeota	Bathyarchaeia	Un_Bathyarchaeia	Un_Bathyarchaeia	Un_Bathyarchaeia	Un_Bathyarchaeia		0	0	0	0	0	0	0	0	0	0	0	0	0	0	0	0	0	0	0	0	0	0	0	148	0	0	0	0	0	0	0	0	0	0	0	0	0	0	0	0	0
A_ASV01112	Archaea	Nanoarchaeota	Nanoarchaeia	Woesearchaeales	Un_Woesearchaeales	Un_Woesearchaeales	Un_Woesearchaeales		0	25	0	0	0	0	0	0	0	0	0	0	0	0	0	0	0	0	122	0	0	0	0	0	0	0	0	0	0	0	0	0	0	0	0	0	0	0	0	0	0
A_ASV01113	Archaea	Nanoarchaeota	Nanoarchaeia	Woesearchaeales	SCGC AAA286-E23	Un_SCGC AAA286-E23	Un_SCGC AAA286-E23		0	0	0	0	0	15	0	0	0	25	0	0	0	0	10	0	0	0	0	0	0	0	0	0	0	0	0	24	68	0	0	5	0	0	0	0	0	0	0	0	0
A_ASV01116	Archaea	Crenarchaeota	Bathyarchaeia	Un_Bathyarchaeia	Un_Bathyarchaeia	Un_Bathyarchaeia	Un_Bathyarchaeia		0	0	0	0	0	0	0	0	0	0	6	0	0	1	34	0	0	51	0	0	0	0	0	0	0	0	0	54	0	0	0	0	0	0	0	0	0	0	0	0	0
A_ASV01119	Archaea	Crenarchaeota	Bathyarchaeia	Un_Bathyarchaeia	Un_Bathyarchaeia	Un_Bathyarchaeia	Un_Bathyarchaeia		0	0	0	0	0	0	0	0	0	0	0	0	0	0	0	0	0	0	0	0	0	0	0	0	0	0	0	0	0	0	0	0	0	0	146	0	0	0	0	0	0
A_ASV01118	Archaea	Nanoarchaeota	Nanoarchaeia	Woesearchaeales	Un_Woesearchaeales	Un_Woesearchaeales	Un_Woesearchaeales		0	0	0	0	0	0	0	0	0	0	0	0	0	0	0	0	0	0	0	0	0	0	0	0	0	0	0	43	19	0	45	0	26	13	0	0	0	0	0	0	0
A_ASV01120	Archaea	Crenarchaeota	Bathyarchaeia	Un_Bathyarchaeia	Un_Bathyarchaeia	Un_Bathyarchaeia	Un_Bathyarchaeia		0	0	0	0	0	0	0	0	0	0	0	0	0	0	0	0	0	0	0	0	0	0	0	0	0	0	0	0	0	0	0	0	0	0	0	0	0	0	0	0	0
A_ASV01126	Archaea	Crenarchaeota	Bathyarchaeia	Un_Bathyarchaeia	Un_Bathyarchaeia	Un_Bathyarchaeia	Un_Bathyarchaeia		0	0	0	0	0	0	0	0	0	0	0	0	0	0	0	0	0	0	0	0	0	0	0	0	0	0	0	0	0	0	0	0	0	0	0	65	0	0	0	0	44
A_ASV01128	Archaea	Crenarchaeota	Bathyarchaeia	Un_Bathyarchaeia	Un_Bathyarchaeia	Un_Bathyarchaeia	Un_Bathyarchaeia		0	0	0	0	0	0	81	0	0	0	0	0	0	0	0	0	0	0	0	0	0	0	0	0	0	0	0	0	0	0	0	0	0	0	0	0	0	0	0	0	0
A_ASV01129	Archaea	Crenarchaeota	Bathyarchaeia	Un_Bathyarchaeia	Un_Bathyarchaeia	Un_Bathyarchaeia	Un_Bathyarchaeia		0	0	0	0	0	0	0	53	0	0	0	0	0	0	0	0	0	23	0	0	0	0	0	0	0	0	0	0	0	0	32	0	0	35	0	0	0	0	0	0	0
A_ASV01130	Archaea	Nanoarchaeota	Nanoarchaeia	Woesearchaeales	SCGC AAA286-E23	Un_SCGC AAA286-E23	Un_SCGC AAA286-E23		0	0	0	0	0	0	0	0	0	0	22	0	0	17	0	16	0	0	0	0	0	0	0	0	0	0	0	0	0	0	0	37	51	0	0	0	0	0	0	0	0
A_ASV01137	Archaea	Crenarchaeota	Bathyarchaeia	Un_Bathyarchaeia	Un_Bathyarchaeia	Un_Bathyarchaeia	Un_Bathyarchaeia		0	0	0	0	0	0	0	0	0	0	0	0	0	0	0	0	0	0	0	0	0	0	0	142	0	0	0	0	0	0	0	0	0	0	0	0	0	0	0	0	0
A_ASV01138	Archaea	Crenarchaeota	Bathyarchaeia	Un_Bathyarchaeia	Un_Bathyarchaeia	Un_Bathyarchaeia	Un_Bathyarchaeia		0	0	0	0	0	0	0	0	0	0	0	0	0	0	0	0	0	0	0	0	0	0	0	0	0	0	0	46	0	0	22	0	0	0	0	0	0	16	0	0	58
A_ASV01140	Archaea	Crenarchaeota	Bathyarchaeia	Un_Bathyarchaeia	Un_Bathyarchaeia	Un_Bathyarchaeia	Un_Bathyarchaeia		0	0	0	0	0	0	0	0	0	0	0	0	0	0	0	0	0	0	0	0	0	0	0	0	0	0	0	0	0	0	0	0	0	0	0	0	0	0	0	0	41
A_ASV01135	Archaea	Hydrothermarchaeota	Hydrothermarchaeia	Hydrothermarchaeales	Un_Hydrothermarchaeales	Un_Hydrothermarchaeales	Un_Hydrothermarchaeales		0	0	0	0	0	0	0	0	0	14	0	0	0	0	0	0	0	0	0	0	0	0	0	0	0	0	0	0	0	0	0	0	0	0	128	0	0	0	0	0	0
A_ASV01139	Archaea	Nanoarchaeota	Nanoarchaeia	Woesearchaeales	Un_Woesearchaeales	Un_Woesearchaeales	Un_Woesearchaeales		0	0	0	0	0	0	0	0	0	0	0	0	0	0	0	0	0	0	0	0	0	0	0	0	0	0	0	0	0	0	0	0	0	0	0	0	47	95	0	0	0
A_ASV01134	Archaea	Nanoarchaeota	Nanoarchaeia	Woesearchaeales	Un_Woesearchaeales	Un_Woesearchaeales	Un_Woesearchaeales		0	0	0	0	34	21	0	0	0	27	16	0	0	44	0	0	0	0	0	0	0	0	0	0	0	0	0	0	0	0	0	0	0	0	0	0	0	0	0	0	0
A_ASV01141	Archaea	Thermoplasmatota	Thermoplasmata	Marine Benthic Group D and DHVEG-1	Un_Marine Benthic Group D and DHVEG-1	Un_Marine Benthic Group D and DHVEG-1	Un_Marine Benthic Group D and DHVEG-1		0	0	0	0	0	0	0	0	0	0	0	0	0	0	0	0	0	0	0	0	0	0	0	0	0	0	0	0	0	0	0	0	0	0	0	0	0	0	0	0	0
A_ASV01145	Archaea	Crenarchaeota	Bathyarchaeia	Un_Bathyarchaeia	Un_Bathyarchaeia	Un_Bathyarchaeia	Un_Bathyarchaeia		0	0	0	0	0	0	0	0	0	0	0	0	0	0	0	0	46	0	0	0	0	0	0	0	0	0	0	0	0	0	0	0	0	94	1	0	0	0	0	0	0
A_ASV01146	Archaea	Crenarchaeota	Nitrososphaeria	Nitrosopumilales	Nitrosopumilaceae	Un_Nitrosopumilaceae	Un_Nitrosopumilaceae		0	0	0	0	0	0	0	0	0	0	0	0	0	0	0	0	0	0	0	0	0	0	141	0	0	0	0	0	0	0	0	0	0	0	0	0	0	0	0	0	0
A_ASV01144	Archaea	Thermoplasmatota	Thermoplasmata	Marine Benthic Group D and DHVEG-1	Un_Marine Benthic Group D and DHVEG-1	Un_Marine Benthic Group D and DHVEG-1	Un_Marine Benthic Group D and DHVEG-1		0	0	0	0	0	0	0	0	0	0	0	0	0	0	0	30	0	0	0	0	0	0	0	0	0	0	0	0	0	0	54	0	57	0	0	0	0	0	0	0	0
A_ASV01149	Archaea	Crenarchaeota	Bathyarchaeia	Un_Bathyarchaeia	Un_Bathyarchaeia	Un_Bathyarchaeia	Un_Bathyarchaeia		0	0	0	0	0	0	0	0	0	0	0	0	0	0	0	0	0	0	0	0	0	140	0	0	0	0	0	0	0	0	0	0	0	0	0	0	0	0	0	0	0
A_ASV01150	Archaea	Crenarchaeota	Bathyarchaeia	Un_Bathyarchaeia	Un_Bathyarchaeia	Un_Bathyarchaeia	Un_Bathyarchaeia		0	0	0	0	0	0	0	0	0	0	0	0	0	0	0	0	0	0	0	0	0	0	0	0	0	0	0	0	0	0	0	0	0	102	0	0	0	0	0	0	0
A_ASV01151	Archaea	Crenarchaeota	Bathyarchaeia	Un_Bathyarchaeia	Un_Bathyarchaeia	Un_Bathyarchaeia	Un_Bathyarchaeia		0	0	0	0	0	0	0	0	0	0	0	0	0	0	0	0	0	0	0	0	0	0	0	0	0	0	0	0	0	0	0	0	0	0	0	140	0	0	0	0	0
A_ASV01156	Archaea	Asgardarchaeota	Odinarchaeia	Un_Odinarchaeia	Un_Odinarchaeia	Un_Odinarchaeia	Un_Odinarchaeia		0	0	0	0	0	0	0	0	0	0	0	0	0	0	0	0	0	0	0	0	0	139	0	0	0	0	0	0	0	0	0	0	0	0	0	0	0	0	0	0	0
A_ASV01152	Archaea	Crenarchaeota	Bathyarchaeia	Un_Bathyarchaeia	Un_Bathyarchaeia	Un_Bathyarchaeia	Un_Bathyarchaeia		27	0	0	26	0	0	35	0	0	0	0	0	0	0	0	0	0	0	0	0	0	0	0	0	0	0	0	0	0	0	0	0	0	0	0	0	0	0	0	0	0
A_ASV01153	Archaea	Crenarchaeota	Bathyarchaeia	Un_Bathyarchaeia	Un_Bathyarchaeia	Un_Bathyarchaeia	Un_Bathyarchaeia		0	0	24	0	115	0	0	0	0	0	0	0	0	0	0	0	0	0	0	0	0	0	0	0	0	0	0	0	0	0	0	0	0	0	0	0	0	0	0	0	0
A_ASV01158	Archaea	Crenarchaeota	Bathyarchaeia	Un_Bathyarchaeia	Un_Bathyarchaeia	Un_Bathyarchaeia	Un_Bathyarchaeia		0	0	0	0	0	0	0	0	0	0	0	0	0	0	0	0	0	0	0	0	0	0	0	0	0	0	0	0	0	0	0	0	0	0	0	139	0	0	0	0	0
A_ASV01159	Archaea	Crenarchaeota	Bathyarchaeia	Un_Bathyarchaeia	Un_Bathyarchaeia	Un_Bathyarchaeia	Un_Bathyarchaeia		0	0	0	0	0	0	0	0	0	0	0	0	0	0	0	0	0	0	0	0	0	0	0	0	0	0	0	0	0	0	0	0	0	0	0	0	0	0	0	99	0
A_ASV01163	Archaea	Crenarchaeota	Nitrososphaeria	Nitrosopumilales	Nitrosopumilaceae	Un_Nitrosopumilaceae	Un_Nitrosopumilaceae		0	0	0	0	0	0	0	0	0	0	0	0	0	0	0	0	0	0	0	0	0	0	0	0	0	0	138	0	0	0	0	0	0	0	0	0	0	0	0	0	0
A_ASV01165	Archaea	Nanoarchaeota	Nanoarchaeia	Woesearchaeales	Un_Woesearchaeales	Un_Woesearchaeales	Un_Woesearchaeales		0	0	0	0	0	0	0	0	0	0	0	0	0	0	0	0	0	0	0	0	0	0	0	0	0	0	0	0	0	0	0	0	0	0	0	138	0	0	0	0	0
A_ASV01167	Archaea	Nanoarchaeota	Nanoarchaeia	Woesearchaeales	Un_Woesearchaeales	Un_Woesearchaeales	Un_Woesearchaeales		0	0	0	0	0	0	0	0	0	0	0	0	0	0	0	0	0	0	0	0	0	0	0	0	0	0	0	0	0	0	0	0	0	0	0	0	0	0	0	138	0
A_ASV01160	Archaea	Thermoplasmatota	Thermoplasmata	Un_Thermoplasmata	Un_Thermoplasmata	Un_Thermoplasmata	Un_Thermoplasmata		0	0	0	0	40	0	39	0	0	0	0	0	0	0	0	0	0	0	0	0	0	0	0	0	0	0	0	0	0	0	0	0	0	0	0	0	0	0	0	0	59
A_ASV01168	Archaea	Crenarchaeota	Bathyarchaeia	Un_Bathyarchaeia	Un_Bathyarchaeia	Un_Bathyarchaeia	Un_Bathyarchaeia		0	0	0	0	15	0	0	17	0	0	0	0	0	0	0	0	0	0	0	0	0	0	0	0	0	0	0	0	0	0	0	0	0	0	0	0	0	0	0	0	56
A_ASV01170	Archaea	Crenarchaeota	Bathyarchaeia	Un_Bathyarchaeia	Un_Bathyarchaeia	Un_Bathyarchaeia	Un_Bathyarchaeia		0	0	0	0	0	0	0	0	0	0	0	0	0	10	0	0	0	0	44	0	0	0	0	0	0	0	0	0	0	0	0	0	0	0	0	83	0	0	0	0	0
A_ASV01174	Archaea	Crenarchaeota	Bathyarchaeia	Un_Bathyarchaeia	Un_Bathyarchaeia	Un_Bathyarchaeia	Un_Bathyarchaeia		0	0	0	0	0	0	0	0	0	0	0	0	0	0	0	0	0	0	26	0	0	0	0	0	0	0	0	0	0	0	0	0	0	111	0	0	0	0	0	0	0
A_ASV01175	Archaea	Crenarchaeota	Bathyarchaeia	Un_Bathyarchaeia	Un_Bathyarchaeia	Un_Bathyarchaeia	Un_Bathyarchaeia		0	0	0	0	0	0	0	0	0	0	0	0	0	0	0	0	0	0	0	0	0	0	0	0	0	137	0	0	0	0	0	0	0	0	0	0	0	0	0	0	0
A_ASV01177	Archaea	Crenarchaeota	Bathyarchaeia	Un_Bathyarchaeia	Un_Bathyarchaeia	Un_Bathyarchaeia	Un_Bathyarchaeia		0	0	0	0	0	0	0	0	0	0	0	0	0	0	0	0	0	0	0	0	0	0	0	0	0	0	0	0	0	0	0	0	0	0	0	137	0	0	0	0	0
A_ASV01178	Archaea	Crenarchaeota	Bathyarchaeia	Un_Bathyarchaeia	Un_Bathyarchaeia	Un_Bathyarchaeia	Un_Bathyarchaeia		0	0	0	0	0	0	0	0	0	0	0	0	0	0	0	0	0	0	0	0	0	0	0	0	0	0	0	0	0	0	0	0	0	0	0	0	0	0	0	0	0
A_ASV01176	Archaea	Un_Archaea	Un_Archaea	Un_Archaea	Un_Archaea	Un_Archaea	Un_Archaea		0	0	0	0	0	0	0	0	0	0	0	0	0	0	0	0	0	0	0	0	0	0	0	0	0	0	0	0	0	0	0	0	0	0	0	137	0	0	0	0	0
A_ASV01169	Archaea	Nanoarchaeota	Nanoarchaeia	Woesearchaeales	Un_Woesearchaeales	Un_Woesearchaeales	Un_Woesearchaeales		0	0	0	0	0	0	0	0	0	0	0	0	0	29	0	0	0	12	0	0	0	0	0	0	0	0	0	48	48	0	0	0	0	0	0	0	0	0	0	0	0
A_ASV01186	Archaea	Asgardarchaeota	Lokiarchaeia	Lokiarchaeia	Lokiarchaeia	Lokiarchaeia	Lokiarchaeia		0	0	0	0	0	0	0	0	0	0	0	0	0	0	0	0	0	0	0	0	0	0	0	0	0	0	0	0	0	0	0	0	0	0	136	0	0	0	0	0	0
A_ASV01182	Archaea	Crenarchaeota	Bathyarchaeia	Un_Bathyarchaeia	Un_Bathyarchaeia	Un_Bathyarchaeia	Un_Bathyarchaeia		0	0	0	0	0	0	0	0	0	0	0	0	0	0	0	0	0	0	0	0	0	0	0	0	0	136	0	0	0	0	0	0	0	0	0	0	0	0	0	0	0
A_ASV01183	Archaea	Crenarchaeota	Nitrososphaeria	Caldiarchaeales	Geothermarchaeaceae	Un_Geothermarchaeaceae	Un_Geothermarchaeaceae		0	0	0	0	0	0	0	0	0	0	0	0	0	0	0	0	0	0	0	0	0	0	0	0	0	0	0	0	0	0	26	0	0	0	0	0	0	0	0	110	0
A_ASV01184	Archaea	Un_Archaea	Un_Archaea	Un_Archaea	Un_Archaea	Un_Archaea	Un_Archaea		0	0	0	0	0	0	0	0	0	0	0	0	0	0	0	0	0	0	0	0	0	0	0	0	0	0	0	0	0	0	0	0	0	136	0	0	0	0	0	0	0
A_ASV01181	Archaea	Nanoarchaeota	Nanoarchaeia	Woesearchaeales	Un_Woesearchaeales	Un_Woesearchaeales	Un_Woesearchaeales		0	0	0	0	0	0	0	0	0	0	21	0	66	49	0	0	0	0	0	0	0	0	0	0	0	0	0	0	0	0	0	0	0	0	0	0	0	0	0	0	0
A_ASV01179	Archaea	Nanoarchaeota	Nanoarchaeia	Woesearchaeales	Un_Woesearchaeales	Un_Woesearchaeales	Un_Woesearchaeales		0	0	18	36	21	0	0	0	0	10	15	0	23	0	13	0	0	0	0	0	0	0	0	0	0	0	0	0	0	0	0	0	0	0	0	0	0	0	0	0	0
A_ASV01191	Archaea	Crenarchaeota	Bathyarchaeia	Un_Bathyarchaeia	Un_Bathyarchaeia	Un_Bathyarchaeia	Un_Bathyarchaeia		0	0	0	0	0	0	0	0	0	0	0	0	0	0	0	0	0	0	0	0	0	0	0	0	0	0	0	0	0	0	0	0	0	0	118	0	0	0	0	0	0
A_ASV01192	Archaea	Crenarchaeota	Bathyarchaeia	Un_Bathyarchaeia	Un_Bathyarchaeia	Un_Bathyarchaeia	Un_Bathyarchaeia		0	0	0	0	0	0	0	0	0	0	0	0	0	0	0	0	0	0	0	0	0	0	0	0	0	0	0	0	0	0	0	0	0	0	0	0	0	0	0	0	0
A_ASV01190	Archaea	Un_Archaea	Un_Archaea	Un_Archaea	Un_Archaea	Un_Archaea	Un_Archaea		0	0	0	0	0	0	0	0	0	0	0	0	0	0	0	0	0	0	0	0	0	0	0	0	0	0	0	0	0	0	0	0	0	135	0	0	0	0	0	0	0
A_ASV01199	Archaea	Asgardarchaeota	Lokiarchaeia	Lokiarchaeia	Lokiarchaeia	Lokiarchaeia	Lokiarchaeia		0	0	0	0	0	0	0	0	0	0	0	0	0	0	0	0	0	0	0	0	0	0	0	0	0	0	0	0	0	0	0	0	0	134	0	0	0	0	0	0	0
A_ASV01203	Archaea	Crenarchaeota	Nitrososphaeria	Nitrosopumilales	Nitrosopumilaceae	Un_Nitrosopumilaceae	Un_Nitrosopumilaceae		0	0	0	0	0	0	0	0	0	0	0	0	0	0	0	0	0	0	0	0	0	0	0	0	0	0	0	0	0	0	0	0	0	0	0	0	0	0	100	0	34
A_ASV01198	Archaea	Un_Archaea	Un_Archaea	Un_Archaea	Un_Archaea	Un_Archaea	Un_Archaea		0	0	0	0	0	0	0	0	0	0	0	0	0	0	0	0	0	0	0	0	0	0	0	0	0	0	0	0	0	0	0	0	0	134	0	0	0	0	0	0	0
A_ASV01201	Archaea	Nanoarchaeota	Nanoarchaeia	Woesearchaeales	Un_Woesearchaeales	Un_Woesearchaeales	Un_Woesearchaeales		0	0	0	0	0	0	0	0	0	0	0	0	0	0	0	0	0	0	0	0	0	0	0	0	0	0	0	0	0	0	0	0	0	0	0	134	0	0	0	0	0
A_ASV01202	Archaea	Nanoarchaeota	Nanoarchaeia	Woesearchaeales	Un_Woesearchaeales	Un_Woesearchaeales	Un_Woesearchaeales		0	0	0	0	0	0	0	0	0	0	0	0	0	0	0	0	0	0	0	0	0	0	0	0	0	0	0	0	0	0	0	0	0	0	0	0	8	0	0	126	0
A_ASV01195	Archaea	Thermoplasmatota	Thermoplasmata	Marine Benthic Group D and DHVEG-1	Un_Marine Benthic Group D and DHVEG-1	Un_Marine Benthic Group D and DHVEG-1	Un_Marine Benthic Group D and DHVEG-1		0	0	0	0	0	0	0	0	0	0	0	0	0	21	35	45	0	1	0	0	0	0	0	0	0	0	0	0	0	0	0	0	32	0	0	0	0	0	0	0	0
A_ASV01200	Archaea	Thermoplasmatota	Thermoplasmata	Marine Benthic Group D and DHVEG-1	Un_Marine Benthic Group D and DHVEG-1	Un_Marine Benthic Group D and DHVEG-1	Un_Marine Benthic Group D and DHVEG-1		0	0	0	0	0	0	0	0	0	0	0	0	0	0	0	0	0	0	0	0	0	0	0	0	0	0	0	0	0	0	0	0	0	0	0	134	0	0	0	0	0
A_ASV01207	Archaea	Crenarchaeota	Bathyarchaeia	Un_Bathyarchaeia	Un_Bathyarchaeia	Un_Bathyarchaeia	Un_Bathyarchaeia		0	0	0	0	0	76	0	0	0	0	0	0	0	0	0	0	0	0	0	0	0	0	0	0	0	0	0	0	0	57	0	0	0	0	0	0	0	0	0	0	0
A_ASV01208	Archaea	Crenarchaeota	Bathyarchaeia	Un_Bathyarchaeia	Un_Bathyarchaeia	Un_Bathyarchaeia	Un_Bathyarchaeia		0	0	0	0	0	0	0	13	0	0	0	0	0	0	0	0	0	0	0	0	0	0	0	0	0	0	0	0	0	0	0	0	0	0	120	0	0	0	0	0	0
A_ASV01209	Archaea	Crenarchaeota	Bathyarchaeia	Un_Bathyarchaeia	Un_Bathyarchaeia	Un_Bathyarchaeia	Un_Bathyarchaeia		0	0	0	0	0	0	0	0	0	20	0	19	33	0	25	0	0	0	0	0	0	0	0	0	0	0	0	0	0	0	0	0	0	0	0	0	0	0	0	0	0
A_ASV01214	Archaea	Crenarchaeota	Bathyarchaeia	Un_Bathyarchaeia	Un_Bathyarchaeia	Un_Bathyarchaeia	Un_Bathyarchaeia		0	0	0	0	0	0	0	0	0	0	0	0	0	0	0	0	0	0	0	0	0	0	0	0	0	0	0	0	0	0	0	0	0	0	0	0	0	133	0	0	0
A_ASV01211	Archaea	Crenarchaeota	Bathyarchaeia	Un_Bathyarchaeia	Un_Bathyarchaeia	Un_Bathyarchaeia	Un_Bathyarchaeia		0	0	0	0	0	0	0	0	0	0	0	0	0	0	0	0	0	0	0	0	0	0	0	0	0	0	133	0	0	0	0	0	0	0	0	0	0	0	0	0	0
A_ASV01210	Archaea	Nanoarchaeota	Nanoarchaeia	Woesearchaeales	Un_Woesearchaeales	Un_Woesearchaeales	Un_Woesearchaeales		0	0	0	0	0	0	0	0	0	0	0	0	0	0	0	0	0	0	0	133	0	0	0	0	0	0	0	0	0	0	0	0	0	0	0	0	0	0	0	0	0
A_ASV01212	Archaea	Nanoarchaeota	Nanoarchaeia	Woesearchaeales	Un_Woesearchaeales	Un_Woesearchaeales	Un_Woesearchaeales		0	0	0	0	0	0	0	0	0	0	0	0	0	0	0	0	0	0	0	0	0	0	0	0	0	0	0	0	21	0	0	0	0	0	112	0	0	0	0	0	0
A_ASV01213	Archaea	Nanoarchaeota	Nanoarchaeia	Woesearchaeales	Un_Woesearchaeales	Un_Woesearchaeales	Un_Woesearchaeales		0	0	0	0	0	0	0	0	0	0	0	0	0	0	0	0	0	0	0	0	0	0	0	0	0	0	0	0	0	0	0	0	0	0	0	0	57	35	41	0	0
A_ASV01215	Archaea	Asgardarchaeota	Un_Asgardarchaeota	Un_Asgardarchaeota	Un_Asgardarchaeota	Un_Asgardarchaeota	Un_Asgardarchaeota		0	0	0	0	0	0	48	0	0	0	9	0	0	21	0	0	0	0	0	0	0	0	0	0	0	0	0	0	0	19	35	0	0	0	0	0	0	0	0	0	0
A_ASV01217	Archaea	Crenarchaeota	Bathyarchaeia	Un_Bathyarchaeia	Un_Bathyarchaeia	Un_Bathyarchaeia	Un_Bathyarchaeia		0	0	0	0	0	0	0	0	0	0	0	0	0	0	0	0	0	0	0	0	0	0	0	0	0	132	0	0	0	0	0	0	0	0	0	0	0	0	0	0	0
A_ASV01218	Archaea	Halobacterota	Methanosarcinia	Methanosarciniales	Un_Methanosarciniales	Un_Methanosarciniales	Un_Methanosarciniales		0	0	0	0	0	0	0	0	0	0	0	0	0	0	0	0	0	0	0	0	0	0	0	0	0	0	0	0	0	0	0	0	0	132	0	0	0	0	0	0	0
A_ASV01223	Archaea	Crenarchaeota	Bathyarchaeia	Un_Bathyarchaeia	Un_Bathyarchaeia	Un_Bathyarchaeia	Un_Bathyarchaeia		0	0	0	0	0	0	0	0	0	0	0	0	0	0	0	0	0	0	0	0	131	0	0	0	0	0	0	0	0	0	0	0	0	0	0	0	0	0	0	0	0
A_ASV01224	Archaea	Crenarchaeota	Bathyarchaeia	Un_Bathyarchaeia	Un_Bathyarchaeia	Un_Bathyarchaeia	Un_Bathyarchaeia		0	0	0	0	0	0	0	0	0	0	0	0	0	0	0	0	0	0	0	0	0	0	0	0	131	0	0	0	0	0	0	0	0	0	0	0	0	0	0	0	0
A_ASV01225	Archaea	Crenarchaeota	Bathyarchaeia	Un_Bathyarchaeia	Un_Bathyarchaeia	Un_Bathyarchaeia	Un_Bathyarchaeia		0	0	0	0	0	0	0	0	0	0	0	0	0	0	0	0	0	0	0	0	0	0	0	0	0	131	0	0	0	0	0	0	0	0	0	0	0	0	0	0	0
A_ASV01230	Archaea	Crenarchaeota	Bathyarchaeia	Un_Bathyarchaeia	Un_Bathyarchaeia	Un_Bathyarchaeia	Un_Bathyarchaeia		0	0	0	0	0	0	0	0	0	0	0	0	0	0	0	0	0	0	0	0	0	0	0	0	0	0	0	0	0	0	0	0	0	0	0	131	0	0	0	0	0
A_ASV01228	Archaea	Halobacterota	Methanomicrobia	Methanomicrobiales	Methanomicrobiaceae	Un_Methanomicrobiaceae	Un_Methanomicrobiaceae		0	0	0	0	0	0	0	0	0	0	0	0	0	0	0	0	0	0	0	0	0	0	0	0	0	0	0	0	0	0	0	0	0	131	0	0	0	0	0	0	0
A_ASV01227	Archaea	Nanoarchaeota	Nanoarchaeia	Woesearchaeales	Un_Woesearchaeales	Un_Woesearchaeales	Un_Woesearchaeales		0	0	0	0	0	0	0	0	0	0	0	0	0	0	0	0	0	0	0	0	0	0	0	0	0	0	0	0	35	0	49	0	0	0	0	0	0	0	0	0	20
A_ASV01220	Archaea	Thermoplasmatota	Thermoplasmata	Marine Benthic Group D and DHVEG-1	Un_Marine Benthic Group D and DHVEG-1	Un_Marine Benthic Group D and DHVEG-1	Un_Marine Benthic Group D and DHVEG-1		0	0	0	0	0	0	0	37	0	0	0	0	0	0	0	0	0	0	0	0	0	0	0	0	0	0	0	0	0	0	0	0	0	0	0	0	0	0	0	0	0
A_ASV01221	Archaea	Thermoplasmatota	Thermoplasmata	Marine Benthic Group D and DHVEG-1	Un_Marine Benthic Group D and DHVEG-1	Un_Marine Benthic Group D and DHVEG-1	Un_Marine Benthic Group D and DHVEG-1		0	0	0	0	0	0	0	0	131	0	0	0	0	0	0	0	0	0	0	0	0	0	0	0	0	0	0	0	0	0	0	0	0	0	0	0	0	0	0	0	0
A_ASV01226	Archaea	Thermoplasmatota	Thermoplasmata	Marine Benthic Group D and DHVEG-1	Un_Marine Benthic Group D and DHVEG-1	Un_Marine Benthic Group D and DHVEG-1	Un_Marine Benthic Group D and DHVEG-1		0	0	0	0	0	0	0	0	0	0	0	0	0	0	0	0	0	0	0	0	0	0	0	0	0	0	0	0	71	60	0	0	0	0	0	0	0	0	0	0	0
A_ASV01231	Archaea	Nanoarchaeota	Nanoarchaeia	Woesearchaeales	Un_Woesearchaeales	Un_Woesearchaeales	Un_Woesearchaeales		0	0	0	0	0	0	0	0	0	36	17	0	30	0	0	0	0	0	0	0	0	0	0	0	0	0	0	0	47	0	0	0	0	0	0	0	0	0	0	0	0
A_ASV01238	Archaea	Crenarchaeota	Bathyarchaeia	Un_Bathyarchaeia	Un_Bathyarchaeia	Un_Bathyarchaeia	Un_Bathyarchaeia		0	0	0	0	0	0	0	0	0	0	0	0	0	0	0	0	0	0	0	0	0	0	0	0	0	0	0	0	0	0	0	0	0	0	129	0	0	0	0	0	0
A_ASV01239	Archaea	Crenarchaeota	Bathyarchaeia	Un_Bathyarchaeia	Un_Bathyarchaeia	Un_Bathyarchaeia	Un_Bathyarchaeia		0	0	0	0	0	0	0	0	0	0	0	0	0	0	0	0	0	0	0	0	0	0	0	0	0	0	0	0	0	0	0	0	0	0	58	71	0	0	0	0	0
A_ASV01241	Archaea	Crenarchaeota	Bathyarchaeia	Un_Bathyarchaeia	Un_Bathyarchaeia	Un_Bathyarchaeia	Un_Bathyarchaeia		0	0	0	0	0	0	0	0	0	0	0	0	0	0	0	0	0	0	0	0	0	0	0	0	0	0	0	0	0	0	0	0	0	0	0	129	0	0	0	0	0
A_ASV01235	Archaea	Nanoarchaeota	Nanoarchaeia	Woesearchaeales	Un_Woesearchaeales	Un_Woesearchaeales	Un_Woesearchaeales		28	65	36	0	0	0	0	0	0	0	0	0	0	0	0	0	0	0	0	0	0	0	0	0	0	0	0	0	0	0	0	0	0	0	0	0	0	0	0	0	0
A_ASV01240	Archaea	Thermoplasmatota	Thermoplasmata	Marine Benthic Group D and DHVEG-1	Un_Marine Benthic Group D and DHVEG-1	Un_Marine Benthic Group D and DHVEG-1	Un_Marine Benthic Group D and DHVEG-1		0	0	0	0	0	0	0	0	0	0	0	0	0	0	0	0	0	0	0	0	0	0	0	0	0	0	0	0	0	0	0	0	0	0	0	129	0	0	0	0	0
A_ASV01242	Archaea	Thermoplasmatota	Thermoplasmata	Marine Benthic Group D and DHVEG-1	Un_Marine Benthic Group D and DHVEG-1	Un_Marine Benthic Group D and DHVEG-1	Un_Marine Benthic Group D and DHVEG-1		0	0	0	0	0	0	0	0	0	0	0	0	0	0	0	0	0	0	0	0	0	0	0	0	0	0	0	0	0	0	0	0	0	0	0	0	0	0	0	0	0
A_ASV01243	Archaea	Crenarchaeota	Bathyarchaeia	Un_Bathyarchaeia	Un_Bathyarchaeia	Un_Bathyarchaeia	Un_Bathyarchaeia		0	0	0	0	3	0	0	33	0	0	0	59	0	0	0	0	0	17	0	0	0	0	0	0	0	0	0	0	0	0	0	0	11	2	0	0	0	0	0	0	2
A_ASV01244	Archaea	Crenarchaeota	Bathyarchaeia	Un_Bathyarchaeia	Un_Bathyarchaeia	Un_Bathyarchaeia	Un_Bathyarchaeia		0	0	0	0	0	0	0	0	0	0	0	0	0	0	0	0	0	0	0	0	0	128	0	0	0	0	0	0	0	0	0	0	0	0	0	0	0	0	0	0	0
A_ASV01246	Archaea	Crenarchaeota	Bathyarchaeia	Un_Bathyarchaeia	Un_Bathyarchaeia	Un_Bathyarchaeia	Un_Bathyarchaeia		0	0	0	0	0	0	0	0	0	0	0	0	0	0	0	0	0	0	0	0	0	0	0	0	0	0	0	0	0	0	0	0	0	0	0	128	0	0	0	0	0
A_ASV01248	Archaea	Crenarchaeota	Bathyarchaeia	Un_Bathyarchaeia	Un_Bathyarchaeia	Un_Bathyarchaeia	Un_Bathyarchaeia		0	0	0	0	0	0	0	0	0	0	0	0	0	0	0	0	0	0	0	0	0	0	0	0	0	0	0	0	0	0	0	0	0	0	0	0	0	0	0	0	18
A_ASV01247	Archaea	Crenarchaeota	Nitrososphaeria	Nitrosopumilales	Nitrosopumilaceae	Un_Nitrosopumilaceae	Un_Nitrosopumilaceae		0	0	0	0	0	0	0	0	0	0	0	0	0	0	0	0	0	0	0	0	0	0	0	0	0	0	0	0	0	0	0	0	0	0	0	0	0	0	0	128	0
A_ASV01254	Archaea	Crenarchaeota	Bathyarchaeia	Un_Bathyarchaeia	Un_Bathyarchaeia	Un_Bathyarchaeia	Un_Bathyarchaeia		0	0	0	0	0	0	0	0	0	0	0	0	0	0	0	0	0	0	0	0	0	0	0	0	0	0	0	0	0	0	0	0	0	0	0	127	0	0	0	0	0
A_ASV01264	Archaea	Crenarchaeota	Bathyarchaeia	Un_Bathyarchaeia	Un_Bathyarchaeia	Un_Bathyarchaeia	Un_Bathyarchaeia		0	0	0	0	0	0	0	0	0	0	0	0	0	0	0	0	0	0	0	0	0	0	0	0	0	0	0	0	0	0	0	0	0	43	83	0	0	0	0	0	0
A_ASV01266	Archaea	Crenarchaeota	Bathyarchaeia	Un_Bathyarchaeia	Un_Bathyarchaeia	Un_Bathyarchaeia	Un_Bathyarchaeia		0	0	0	0	0	0	0	0	0	0	0	0	0	0	0	0	0	0	0	0	0	0	0	0	0	0	0	0	0	0	0	0	0	0	0	0	0	0	0	40	23
A_ASV01259	Archaea	Crenarchaeota	Nitrososphaeria	Nitrosopumilales	Nitrosopumilaceae	Un_Nitrosopumilaceae	Un_Nitrosopumilaceae		0	0	0	0	0	0	0	0	0	0	0	0	0	0	0	0	0	0	0	0	0	0	0	0	0	0	126	0	0	0	0	0	0	0	0	0	0	0	0	0	0
A_ASV01260	Archaea	Nanoarchaeota	Nanoarchaeia	Woesearchaeales	Un_Woesearchaeales	Un_Woesearchaeales	Un_Woesearchaeales		0	0	0	0	0	0	0	0	0	0	0	0	0	0	0	0	0	0	0	0	0	0	0	0	0	0	0	45	20	22	19	0	20	0	0	0	0	0	0	0	0
A_ASV01262	Archaea	Thermoplasmatota	Thermoplasmata	Marine Benthic Group D and DHVEG-1	Un_Marine Benthic Group D and DHVEG-1	Un_Marine Benthic Group D and DHVEG-1	Un_Marine Benthic Group D and DHVEG-1		0	0	0	0	0	0	0	0	0	0	0	0	0	0	0	0	0	0	0	0	0	0	0	0	0	0	0	0	0	0	0	0	0	126	0	0	0	0	0	0	0
A_ASV01263	Archaea	Thermoplasmatota	Thermoplasmata	Marine Benthic Group D and DHVEG-1	Un_Marine Benthic Group D and DHVEG-1	Un_Marine Benthic Group D and DHVEG-1	Un_Marine Benthic Group D and DHVEG-1		0	0	0	0	0	0	0	0	0	0	0	0	0	0	0	0	0	0	0	0	0	0	0	0	0	0	0	0	0	0	0	0	0	126	0	0	0	0	0	0	0
A_ASV01270	Archaea	Crenarchaeota	Nitrososphaeria	Nitrosopumilales	Nitrosopumilaceae	Un_Nitrosopumilaceae	Un_Nitrosopumilaceae		0	0	0	0	0	0	0	0	0	0	0	0	0	0	0	0	0	0	0	0	0	0	0	0	0	0	0	0	0	0	0	0	0	0	0	0	39	0	42	44	0
A_ASV01268	Archaea	Un_Archaea	Un_Archaea	Un_Archaea	Un_Archaea	Un_Archaea	Un_Archaea		0	0	0	0	0	43	0	0	0	0	29	0	0	0	0	0	0	0	0	0	0	0	0	0	0	0	0	0	0	0	0	53	0	0	0	0	0	0	0	0	0
A_ASV01281	Archaea	Crenarchaeota	Bathyarchaeia	Un_Bathyarchaeia	Un_Bathyarchaeia	Un_Bathyarchaeia	Un_Bathyarchaeia		0	0	0	0	0	0	0	0	0	0	0	0	0	0	0	0	0	0	0	0	0	0	0	0	0	0	0	0	0	0	0	0	0	0	123	0	0	0	0	0	0
A_ASV01282	Archaea	Crenarchaeota	Bathyarchaeia	Un_Bathyarchaeia	Un_Bathyarchaeia	Un_Bathyarchaeia	Un_Bathyarchaeia		0	0	0	0	0	0	0	0	0	0	0	0	0	0	0	0	0	0	0	0	0	0	0	0	0	0	0	0	0	0	0	0	0	0	123	0	0	0	0	0	0
A_ASV01276	Archaea	Nanoarchaeota	Nanoarchaeia	Woesearchaeales	Un_Woesearchaeales	Un_Woesearchaeales	Un_Woesearchaeales		0	0	0	0	0	0	25	0	0	21	77	0	0	0	0	0	0	0	0	0	0	0	0	0	0	0	0	0	0	0	0	0	0	0	0	0	0	0	0	0	0
A_ASV01279	Archaea	Thermoplasmatota	Thermoplasmata	Marine Benthic Group D and DHVEG-1	Un_Marine Benthic Group D and DHVEG-1	Un_Marine Benthic Group D and DHVEG-1	Un_Marine Benthic Group D and DHVEG-1		0	0	0	0	0	0	0	0	0	30	0	29	0	14	1	6	6	17	0	0	0	0	0	0	0	0	0	0	1	1	0	9	4	0	0	0	0	0	0	0	0
A_ASV01285	Archaea	Crenarchaeota	Bathyarchaeia	Un_Bathyarchaeia	Un_Bathyarchaeia	Un_Bathyarchaeia	Un_Bathyarchaeia		0	0	0	0	0	0	0	0	0	0	0	0	0	0	0	0	0	0	0	0	0	0	0	0	0	0	0	0	0	0	0	0	0	0	122	0	0	0	0	0	0
A_ASV01283	Archaea	Nanoarchaeota	Nanoarchaeia	Woesearchaeales	Un_Woesearchaeales	Un_Woesearchaeales	Un_Woesearchaeales		0	0	0	0	0	0	0	0	0	0	0	0	0	0	0	0	0	48	0	0	0	0	0	0	0	0	0	0	0	0	0	45	29	0	0	0	0	0	0	0	0
A_ASV01289	Archaea	Crenarchaeota	Bathyarchaeia	Un_Bathyarchaeia	Un_Bathyarchaeia	Un_Bathyarchaeia	Un_Bathyarchaeia		0	0	0	0	0	0	0	47	0	0	0	0	0	0	0	40	0	0	0	0	0	0	0	0	0	0	0	0	15	0	0	0	0	19	0	0	0	0	0	0	0
A_ASV01291	Archaea	Crenarchaeota	Bathyarchaeia	Un_Bathyarchaeia	Un_Bathyarchaeia	Un_Bathyarchaeia	Un_Bathyarchaeia		0	0	0	0	0	0	0	0	0	0	0	0	0	20	0	11	0	0	0	0	0	0	0	0	0	0	0	0	0	0	0	0	0	90	0	0	0	0	0	0	0
A_ASV01294	Archaea	Crenarchaeota	Bathyarchaeia	Un_Bathyarchaeia	Un_Bathyarchaeia	Un_Bathyarchaeia	Un_Bathyarchaeia		0	0	0	0	0	0	0	0	0	0	0	0	0	0	0	0	0	0	0	0	0	0	0	0	0	0	0	0	0	0	40	0	0	50	31	0	0	0	0	0	0
A_ASV01295	Archaea	Crenarchaeota	Bathyarchaeia	Un_Bathyarchaeia	Un_Bathyarchaeia	Un_Bathyarchaeia	Un_Bathyarchaeia		0	0	0	0	0	0	0	0	0	0	0	0	0	0	0	0	0	0	0	0	0	0	0	0	0	0	0	0	0	0	0	0	0	0	121	0	0	0	0	0	0
A_ASV01296	Archaea	Crenarchaeota	Bathyarchaeia	Un_Bathyarchaeia	Un_Bathyarchaeia	Un_Bathyarchaeia	Un_Bathyarchaeia		0	0	0	0	0	0	0	0	0	0	0	0	0	0	0	0	0	0	0	0	0	0	0	0	0	0	0	0	0	0	0	0	0	0	0	0	0	0	0	38	0
A_ASV01288	Archaea	Hydrothermarchaeota	Hydrothermarchaeia	Hydrothermarchaeales	Un_Hydrothermarchaeales	Un_Hydrothermarchaeales	Un_Hydrothermarchaeales		0	0	0	0	37	0	34	0	50	0	0	0	0	0	0	0	0	0	0	0	0	0	0	0	0	0	0	0	0	0	0	0	0	0	0	0	0	0	0	0	0
A_ASV01290	Archaea	Nanoarchaeota	Nanoarchaeia	Woesearchaeales	Un_Woesearchaeales	Un_Woesearchaeales	Un_Woesearchaeales		0	0	0	0	0	0	0	0	0	0	0	0	34	0	0	36	20	0	0	0	0	0	0	0	0	0	0	0	31	0	0	0	0	0	0	0	0	0	0	0	0
A_ASV01301	Archaea	Crenarchaeota	Bathyarchaeia	Un_Bathyarchaeia	Un_Bathyarchaeia	Un_Bathyarchaeia	Un_Bathyarchaeia		0	0	0	0	0	0	0	0	0	0	0	0	0	0	0	0	0	0	0	0	0	0	0	0	0	0	0	0	0	0	0	0	0	120	0	0	0	0	0	0	0
A_ASV01302	Archaea	Crenarchaeota	Bathyarchaeia	Un_Bathyarchaeia	Un_Bathyarchaeia	Un_Bathyarchaeia	Un_Bathyarchaeia		0	0	0	0	0	0	0	0	0	0	0	0	0	0	0	0	0	0	0	0	0	0	0	0	0	0	0	0	0	0	0	0	0	0	120	0	0	0	0	0	0
A_ASV01297	Archaea	Crenarchaeota	Bathyarchaeia	Un_Bathyarchaeia	Un_Bathyarchaeia	Un_Bathyarchaeia	Un_Bathyarchaeia		0	0	0	25	0	0	0	0	0	0	0	0	0	0	0	0	14	28	0	0	0	0	0	0	0	0	0	0	0	0	11	0	0	0	0	42	0	0	0	0	0
A_ASV01298	Archaea	Thermoplasmatota	Thermoplasmata	Marine Benthic Group D and DHVEG-1	Un_Marine Benthic Group D and DHVEG-1	Un_Marine Benthic Group D and DHVEG-1	Un_Marine Benthic Group D and DHVEG-1		0	0	0	0	0	0	0	76	44	0	0	0	0	0	0	0	0	0	0	0	0	0	0	0	0	0	0	0	0	0	0	0	0	0	0	0	0	0	0	0	0
A_ASV01307	Archaea	Crenarchaeota	Bathyarchaeia	Un_Bathyarchaeia	Un_Bathyarchaeia	Un_Bathyarchaeia	Un_Bathyarchaeia		0	0	0	0	0	0	0	0	0	0	0	0	0	0	0	0	0	0	0	0	0	0	0	0	0	0	0	0	0	0	0	0	0	0	0	0	0	0	0	64	29
A_ASV01304	Archaea	Nanoarchaeota	Nanoarchaeia	Woesearchaeales	Un_Woesearchaeales	Un_Woesearchaeales	Un_Woesearchaeales		0	0	0	0	0	0	0	0	0	0	0	0	0	0	0	0	0	0	119	0	0	0	0	0	0	0	0	0	0	0	0	0	0	0	0	0	0	0	0	0	0
A_ASV01313	Archaea	Crenarchaeota	Bathyarchaeia	Un_Bathyarchaeia	Un_Bathyarchaeia	Un_Bathyarchaeia	Un_Bathyarchaeia		0	0	0	0	0	0	0	0	0	0	0	0	0	0	0	0	0	0	0	0	0	0	0	0	0	0	0	0	0	0	0	0	0	0	0	0	0	0	0	52	0
A_ASV01311	Archaea	Thermoplasmatota	Thermoplasmata	Marine Benthic Group D and DHVEG-1	Un_Marine Benthic Group D and DHVEG-1	Un_Marine Benthic Group D and DHVEG-1	Un_Marine Benthic Group D and DHVEG-1		0	0	0	0	0	0	0	0	0	0	0	0	0	0	0	0	0	0	0	0	0	0	0	0	0	0	0	0	0	0	0	0	0	0	0	118	0	0	0	0	0
A_ASV01316	Archaea	Asgardarchaeota	Un_Asgardarchaeota	Un_Asgardarchaeota	Un_Asgardarchaeota	Un_Asgardarchaeota	Un_Asgardarchaeota		0	0	0	0	0	0	0	0	0	26	24	0	0	15	0	0	0	0	0	0	0	0	0	0	0	0	0	0	0	0	0	11	0	0	0	0	0	0	0	41	0
A_ASV01315	Archaea	Un_Archaea	Un_Archaea	Un_Archaea	Un_Archaea	Un_Archaea	Un_Archaea		0	0	0	0	0	0	0	0	0	39	0	0	0	0	0	0	0	0	0	0	0	0	0	0	0	0	0	0	0	0	0	0	0	0	0	78	0	0	0	0	0
A_ASV01319	Archaea	Nanoarchaeota	Nanoarchaeia	Woesearchaeales	SCGC AAA286-E23	Un_SCGC AAA286-E23	Un_SCGC AAA286-E23		0	0	0	0	0	0	0	0	0	0	0	0	0	0	0	0	0	0	0	0	0	0	0	0	0	0	0	0	0	0	0	0	0	0	0	0	43	74	0	0	0
A_ASV01320	Archaea	Asgardarchaeota	Un_Asgardarchaeota	Un_Asgardarchaeota	Un_Asgardarchaeota	Un_Asgardarchaeota	Un_Asgardarchaeota		0	0	0	0	0	0	0	0	0	0	0	0	0	0	0	51	0	0	0	0	0	0	0	0	0	0	0	0	0	0	0	0	0	65	0	0	0	0	0	0	0
A_ASV01322	Archaea	Crenarchaeota	Bathyarchaeia	Un_Bathyarchaeia	Un_Bathyarchaeia	Un_Bathyarchaeia	Un_Bathyarchaeia		0	0	0	0	0	0	0	0	0	0	0	0	0	0	0	0	0	0	0	0	0	0	0	0	0	0	0	0	0	0	0	0	0	0	116	0	0	0	0	0	0
A_ASV01323	Archaea	Crenarchaeota	Bathyarchaeia	Un_Bathyarchaeia	Un_Bathyarchaeia	Un_Bathyarchaeia	Un_Bathyarchaeia		0	0	0	0	0	0	0	0	0	0	0	0	0	0	0	0	0	0	0	0	0	0	0	0	0	0	0	0	0	0	0	0	0	0	0	116	0	0	0	0	0
A_ASV01324	Archaea	Crenarchaeota	Bathyarchaeia	Un_Bathyarchaeia	Un_Bathyarchaeia	Un_Bathyarchaeia	Un_Bathyarchaeia		0	0	0	0	0	0	0	0	0	0	0	0	0	0	0	0	0	0	0	0	0	0	0	0	0	0	0	0	0	0	0	0	0	0	0	0	0	0	0	0	0
A_ASV01329	Archaea	Crenarchaeota	Bathyarchaeia	Un_Bathyarchaeia	Un_Bathyarchaeia	Un_Bathyarchaeia	Un_Bathyarchaeia		0	0	0	0	0	0	0	0	0	0	0	0	0	0	0	0	0	0	0	0	0	0	0	115	0	0	0	0	0	0	0	0	0	0	0	0	0	0	0	0	0
A_ASV01330	Archaea	Crenarchaeota	Bathyarchaeia	Un_Bathyarchaeia	Un_Bathyarchaeia	Un_Bathyarchaeia	Un_Bathyarchaeia		0	0	0	0	0	0	0	0	0	0	0	0	0	0	0	0	0	0	0	0	0	0	0	0	0	0	115	0	0	0	0	0	0	0	0	0	0	0	0	0	0
A_ASV01332	Archaea	Crenarchaeota	Bathyarchaeia	Un_Bathyarchaeia	Un_Bathyarchaeia	Un_Bathyarchaeia	Un_Bathyarchaeia		0	0	0	0	0	0	0	0	0	0	0	0	0	0	0	0	0	0	0	0	0	0	0	0	0	0	0	0	0	0	0	0	0	0	115	0	0	0	0	0	0
A_ASV01331	Archaea	Crenarchaeota	Nitrososphaeria	Nitrosopumilales	Nitrosopumilaceae	Candidatus Nitrosopumilus	Un_Candidatus Nitrosopumilus		0	0	0	0	0	0	0	0	0	0	0	0	0	0	0	0	0	0	0	0	0	0	0	0	0	0	0	0	0	0	0	0	0	0	115	0	0	0	0	0	0
A_ASV01328	Archaea	Nanoarchaeota	Nanoarchaeia	Woesearchaeales	Un_Woesearchaeales	Un_Woesearchaeales	Un_Woesearchaeales		0	0	0	0	0	0	0	0	0	0	0	0	0	0	0	0	0	0	115	0	0	0	0	0	0	0	0	0	0	0	0	0	0	0	0	0	0	0	0	0	0
A_ASV01327	Archaea	Nanoarchaeota	Nanoarchaeia	Woesearchaeales	Un_Woesearchaeales	Un_Woesearchaeales	Un_Woesearchaeales		0	0	0	0	0	0	0	0	0	0	35	23	0	0	40	0	17	0	0	0	0	0	0	0	0	0	0	0	0	0	0	0	0	0	0	0	0	0	0	0	0
A_ASV01337	Archaea	Asgardarchaeota	Lokiarchaeia	Lokiarchaeia	Lokiarchaeia	Lokiarchaeia	Lokiarchaeia		0	0	0	0	0	0	0	0	0	0	0	0	0	0	0	0	0	0	0	0	0	0	0	0	0	0	0	0	0	0	0	0	0	0	114	0	0	0	0	0	0
A_ASV01335	Archaea	Crenarchaeota	Bathyarchaeia	Un_Bathyarchaeia	Un_Bathyarchaeia	Un_Bathyarchaeia	Un_Bathyarchaeia		0	0	0	0	0	0	0	0	0	0	0	0	0	0	0	0	0	0	0	0	0	0	0	0	0	0	0	0	0	35	0	0	0	79	0	0	0	0	0	0	0
A_ASV01338	Archaea	Crenarchaeota	Bathyarchaeia	Un_Bathyarchaeia	Un_Bathyarchaeia	Un_Bathyarchaeia	Un_Bathyarchaeia		0	0	0	0	0	0	0	0	0	0	0	0	0	0	0	0	0	0	0	0	0	0	0	0	0	0	0	0	0	0	0	0	0	0	0	114	0	0	0	0	0
A_ASV01334	Archaea	Nanoarchaeota	Nanoarchaeia	Woesearchaeales	SCGC AAA286-E23	Un_SCGC AAA286-E23	Un_SCGC AAA286-E23		33	71	10	0	0	0	0	0	0	0	0	0	0	0	0	0	0	0	0	0	0	0	0	0	0	0	0	0	0	0	0	0	0	0	0	0	0	0	0	0	0
A_ASV01342	Archaea	Crenarchaeota	Bathyarchaeia	Un_Bathyarchaeia	Un_Bathyarchaeia	Un_Bathyarchaeia	Un_Bathyarchaeia		0	0	0	0	0	0	0	0	0	0	0	0	0	0	0	0	0	0	0	0	0	113	0	0	0	0	0	0	0	0	0	0	0	0	0	0	0	0	0	0	0
A_ASV01343	Archaea	Crenarchaeota	Bathyarchaeia	Un_Bathyarchaeia	Un_Bathyarchaeia	Un_Bathyarchaeia	Un_Bathyarchaeia		0	0	0	0	0	0	0	0	0	0	0	0	0	0	0	0	0	0	0	0	0	0	0	0	0	0	0	0	0	0	0	0	0	0	0	113	0	0	0	0	0
A_ASV01339	Archaea	Crenarchaeota	Bathyarchaeia	Un_Bathyarchaeia	Un_Bathyarchaeia	Un_Bathyarchaeia	Un_Bathyarchaeia		0	0	0	0	0	0	17	0	0	0	0	0	0	0	0	0	0	0	0	0	0	0	0	0	0	0	0	0	0	0	0	0	0	0	0	0	0	0	0	0	0
A_ASV01340	Archaea	Crenarchaeota	Nitrososphaeria	Un_Nitrososphaeria	Un_Nitrososphaeria	Un_Nitrososphaeria	Un_Nitrososphaeria		0	0	0	0	0	0	0	0	61	0	0	0	0	0	0	0	0	0	0	0	0	0	0	0	0	0	0	0	0	0	0	0	0	0	0	0	0	0	0	0	0
A_ASV01344	Archaea	Hydrothermarchaeota	Hydrothermarchaeia	Hydrothermarchaeales	Un_Hydrothermarchaeales	Un_Hydrothermarchaeales	Un_Hydrothermarchaeales		0	0	0	0	0	0	0	0	0	0	0	0	0	0	0	0	0	0	0	0	0	0	0	0	0	0	0	0	0	0	0	0	0	0	0	0	0	0	0	113	0
A_ASV01341	Archaea	Nanoarchaeota	Nanoarchaeia	Woesearchaeales	Un_Woesearchaeales	Un_Woesearchaeales	Un_Woesearchaeales		0	0	0	0	0	0	0	0	0	0	0	0	0	0	22	0	0	0	0	0	0	0	0	0	0	0	0	0	0	0	47	16	28	0	0	0	0	0	0	0	0
A_ASV01348	Archaea	Crenarchaeota	Bathyarchaeia	Un_Bathyarchaeia	Un_Bathyarchaeia	Un_Bathyarchaeia	Un_Bathyarchaeia		0	0	0	0	0	0	0	0	0	0	0	0	0	0	0	0	0	0	0	0	0	0	112	0	0	0	0	0	0	0	0	0	0	0	0	0	0	0	0	0	0
A_ASV01350	Archaea	Crenarchaeota	Bathyarchaeia	Un_Bathyarchaeia	Un_Bathyarchaeia	Un_Bathyarchaeia	Un_Bathyarchaeia		0	0	0	0	0	0	0	0	0	0	0	0	0	0	0	0	0	0	0	0	0	0	0	0	0	0	0	0	0	0	0	0	0	0	112	0	0	0	0	0	0
A_ASV01351	Archaea	Crenarchaeota	Bathyarchaeia	Un_Bathyarchaeia	Un_Bathyarchaeia	Un_Bathyarchaeia	Un_Bathyarchaeia		0	0	0	0	0	0	0	0	0	0	0	0	0	0	0	0	0	0	0	0	0	0	0	0	0	0	0	0	0	0	0	0	0	0	0	0	0	0	0	0	0
A_ASV01349	Archaea	Un_Archaea	Un_Archaea	Un_Archaea	Un_Archaea	Un_Archaea	Un_Archaea		0	0	0	0	0	0	0	0	0	0	0	0	0	0	0	0	0	0	0	0	0	0	0	0	0	0	0	0	0	0	0	0	0	0	112	0	0	0	0	0	0
A_ASV01346	Archaea	Nanoarchaeota	Nanoarchaeia	Woesearchaeales	Un_Woesearchaeales	Un_Woesearchaeales	Un_Woesearchaeales		0	0	38	0	0	0	0	0	0	0	0	0	0	0	0	0	0	42	0	0	0	0	0	0	0	0	0	0	0	32	0	0	0	0	0	0	0	0	0	0	0
A_ASV01361	Archaea	Crenarchaeota	Bathyarchaeia	Un_Bathyarchaeia	Un_Bathyarchaeia	Un_Bathyarchaeia	Un_Bathyarchaeia		0	0	0	0	0	0	0	0	0	0	0	0	0	0	0	0	0	0	0	0	0	0	0	0	0	0	0	0	0	0	0	0	0	111	0	0	0	0	0	0	0
A_ASV01363	Archaea	Crenarchaeota	Nitrososphaeria	Caldiarchaeales	Geothermarchaeaceae	Un_Geothermarchaeaceae	Un_Geothermarchaeaceae		0	0	0	0	0	0	0	0	0	0	0	0	0	0	0	0	0	0	0	0	0	0	0	0	0	0	0	0	0	0	0	0	0	0	0	0	0	0	0	0	0
A_ASV01354	Archaea	Thermoplasmatota	Thermoplasmata	Marine Benthic Group D and DHVEG-1	Un_Marine Benthic Group D and DHVEG-1	Un_Marine Benthic Group D and DHVEG-1	Un_Marine Benthic Group D and DHVEG-1		0	0	0	0	0	0	0	53	0	0	0	0	0	0	0	0	0	0	0	0	0	0	0	0	0	0	0	0	0	0	0	0	0	0	0	0	0	0	36	0	0
A_ASV01355	Archaea	Thermoplasmatota	Thermoplasmata	Un_Thermoplasmata	Un_Thermoplasmata	Un_Thermoplasmata	Un_Thermoplasmata		0	0	0	0	0	0	0	0	85	0	0	0	0	0	0	0	26	0	0	0	0	0	0	0	0	0	0	0	0	0	0	0	0	0	0	0	0	0	0	0	0
A_ASV01368	Archaea	Asgardarchaeota	Odinarchaeia	Un_Odinarchaeia	Un_Odinarchaeia	Un_Odinarchaeia	Un_Odinarchaeia		0	0	0	0	0	0	0	0	44	0	0	66	0	0	0	0	0	0	0	0	0	0	0	0	0	0	0	0	0	0	0	0	0	0	0	0	0	0	0	0	0
A_ASV01375	Archaea	Crenarchaeota	Bathyarchaeia	Un_Bathyarchaeia	Un_Bathyarchaeia	Un_Bathyarchaeia	Un_Bathyarchaeia		0	0	0	0	0	0	0	0	0	0	0	0	0	0	0	0	0	0	0	0	0	0	0	0	0	0	0	0	0	0	0	0	0	0	0	0	0	0	0	0	110
A_ASV01369	Archaea	Un_Archaea	Un_Archaea	Un_Archaea	Un_Archaea	Un_Archaea	Un_Archaea		0	0	0	0	0	0	0	0	0	0	0	0	0	110	0	0	0	0	0	0	0	0	0	0	0	0	0	0	0	0	0	0	0	0	0	0	0	0	0	0	0
A_ASV01367	Archaea	Nanoarchaeota	Nanoarchaeia	Woesearchaeales	Un_Woesearchaeales	Un_Woesearchaeales	Un_Woesearchaeales		0	0	0	0	19	0	0	0	0	23	40	0	28	0	0	0	0	0	0	0	0	0	0	0	0	0	0	0	0	0	0	0	0	0	0	0	0	0	0	0	0
A_ASV01373	Archaea	Thermoplasmatota	Thermoplasmata	Marine Benthic Group D and DHVEG-1	Un_Marine Benthic Group D and DHVEG-1	Un_Marine Benthic Group D and DHVEG-1	Un_Marine Benthic Group D and DHVEG-1		0	0	0	0	0	0	0	0	0	0	0	0	0	0	0	0	0	0	0	0	0	0	0	0	0	0	0	0	0	0	0	0	0	0	0	110	0	0	0	0	0
A_ASV01382	Archaea	Crenarchaeota	Bathyarchaeia	Un_Bathyarchaeia	Un_Bathyarchaeia	Un_Bathyarchaeia	Un_Bathyarchaeia		0	0	0	0	0	0	0	0	0	0	0	0	0	0	0	0	0	0	0	0	0	0	0	0	0	109	0	0	0	0	0	0	0	0	0	0	0	0	0	0	0
A_ASV01381	Archaea	Crenarchaeota	Bathyarchaeia	Un_Bathyarchaeia	Un_Bathyarchaeia	Un_Bathyarchaeia	Un_Bathyarchaeia		0	0	0	0	0	0	0	0	0	0	0	0	0	0	0	0	0	0	0	0	0	0	0	0	109	0	0	0	0	0	0	0	0	0	0	0	0	0	0	0	0
A_ASV01384	Archaea	Crenarchaeota	Bathyarchaeia	Un_Bathyarchaeia	Un_Bathyarchaeia	Un_Bathyarchaeia	Un_Bathyarchaeia		0	0	0	0	0	0	0	0	0	0	0	0	0	0	0	0	0	0	0	0	0	0	0	0	0	0	0	0	0	0	0	0	0	0	0	0	0	0	0	0	0
A_ASV01383	Archaea	Un_Archaea	Un_Archaea	Un_Archaea	Un_Archaea	Un_Archaea	Un_Archaea		0	0	0	0	0	0	0	0	0	0	0	0	0	0	0	0	0	0	0	0	0	0	0	0	0	0	0	0	0	0	0	0	0	0	109	0	0	0	0	0	0
A_ASV01377	Archaea	Nanoarchaeota	Nanoarchaeia	Woesearchaeales	Un_Woesearchaeales	Un_Woesearchaeales	Un_Woesearchaeales		0	0	0	39	0	33	0	0	37	0	0	0	0	0	0	0	0	0	0	0	0	0	0	0	0	0	0	0	0	0	0	0	0	0	0	0	0	0	0	0	0
A_ASV01379	Archaea	Nanoarchaeota	Nanoarchaeia	Woesearchaeales	Un_Woesearchaeales	Un_Woesearchaeales	Un_Woesearchaeales		0	0	0	0	0	0	0	0	0	23	0	25	0	0	0	0	0	0	61	0	0	0	0	0	0	0	0	0	0	0	0	0	0	0	0	0	0	0	0	0	0
A_ASV01397	Archaea	Asgardarchaeota	Un_Asgardarchaeota	Un_Asgardarchaeota	Un_Asgardarchaeota	Un_Asgardarchaeota	Un_Asgardarchaeota		0	0	0	0	0	0	0	0	0	0	0	0	0	0	0	0	0	0	0	0	0	0	0	0	0	0	0	0	0	0	0	0	0	0	0	108	0	0	0	0	0
A_ASV01392	Archaea	Crenarchaeota	Bathyarchaeia	Un_Bathyarchaeia	Un_Bathyarchaeia	Un_Bathyarchaeia	Un_Bathyarchaeia		0	0	0	0	0	0	0	0	0	0	0	0	0	0	0	0	0	0	108	0	0	0	0	0	0	0	0	0	0	0	0	0	0	0	0	0	0	0	0	0	0
A_ASV01398	Archaea	Crenarchaeota	Nitrososphaeria	Nitrosopumilales	Nitrosopumilaceae	Un_Nitrosopumilaceae	Un_Nitrosopumilaceae		0	0	0	0	0	0	0	0	0	0	0	0	0	0	0	0	0	0	0	0	0	0	0	0	0	0	0	0	0	0	0	0	0	0	0	0	0	0	108	0	0
A_ASV01387	Archaea	Nanoarchaeota	Nanoarchaeia	Woesearchaeales	Un_Woesearchaeales	Un_Woesearchaeales	Un_Woesearchaeales		0	0	0	0	0	0	0	108	0	0	0	0	0	0	0	0	0	0	0	0	0	0	0	0	0	0	0	0	0	0	0	0	0	0	0	0	0	0	0	0	0
A_ASV01388	Archaea	Nanoarchaeota	Nanoarchaeia	Woesearchaeales	Un_Woesearchaeales	Un_Woesearchaeales	Un_Woesearchaeales		0	0	0	0	0	0	0	0	0	7	0	0	0	0	0	0	29	31	0	0	0	0	0	0	0	0	0	0	0	0	31	0	10	0	0	0	0	0	0	0	0
A_ASV01394	Archaea	Thermoplasmatota	Thermoplasmata	JdFR-43	Un_JdFR-43	Un_JdFR-43	Un_JdFR-43		0	0	0	0	0	0	0	0	0	0	0	0	0	0	0	0	0	0	0	0	0	108	0	0	0	0	0	0	0	0	0	0	0	0	0	0	0	0	0	0	0
A_ASV01389	Archaea	Thermoplasmatota	Thermoplasmata	Marine Benthic Group D and DHVEG-1	Un_Marine Benthic Group D and DHVEG-1	Un_Marine Benthic Group D and DHVEG-1	Un_Marine Benthic Group D and DHVEG-1		0	0	0	0	0	0	0	0	0	0	0	0	0	16	0	17	0	0	0	0	0	0	0	0	0	0	0	0	0	0	0	0	0	27	0	0	0	0	0	0	0
A_ASV01390	Archaea	Thermoplasmatota	Thermoplasmata	Marine Benthic Group D and DHVEG-1	Un_Marine Benthic Group D and DHVEG-1	Un_Marine Benthic Group D and DHVEG-1	Un_Marine Benthic Group D and DHVEG-1		0	0	0	0	0	0	0	0	0	0	0	0	0	0	0	12	0	0	0	0	0	0	0	0	0	0	0	0	0	36	0	45	0	0	0	0	0	0	0	0	0
A_ASV01399	Archaea	Crenarchaeota	Bathyarchaeia	Un_Bathyarchaeia	Un_Bathyarchaeia	Un_Bathyarchaeia	Un_Bathyarchaeia		0	0	0	0	32	0	0	0	0	26	0	0	0	0	0	0	21	0	0	0	0	0	0	0	0	0	0	0	0	0	0	0	0	0	0	0	0	0	0	0	0
A_ASV01405	Archaea	Crenarchaeota	Bathyarchaeia	Un_Bathyarchaeia	Un_Bathyarchaeia	Un_Bathyarchaeia	Un_Bathyarchaeia		0	0	0	0	0	0	0	0	0	0	0	0	0	0	0	0	0	0	36	0	0	0	0	0	0	0	0	0	0	0	0	0	0	0	71	0	0	0	0	0	0
A_ASV01409	Archaea	Crenarchaeota	Nitrososphaeria	Nitrosopumilales	Nitrosopumilaceae	Cenarchaeum	Un_Cenarchaeum		0	0	0	0	0	0	0	0	0	0	0	0	0	0	0	0	0	0	0	0	0	0	0	0	0	0	0	0	0	0	0	0	0	0	0	0	0	0	0	0	44
A_ASV01402	Archaea	Nanoarchaeota	Nanoarchaeia	Woesearchaeales	Un_Woesearchaeales	Un_Woesearchaeales	Un_Woesearchaeales		0	0	0	0	0	0	0	0	0	0	0	42	35	30	0	0	0	0	0	0	0	0	0	0	0	0	0	0	0	0	0	0	0	0	0	0	0	0	0	0	0
A_ASV01403	Archaea	Thermoplasmatota	Thermoplasmata	Marine Benthic Group D and DHVEG-1	Un_Marine Benthic Group D and DHVEG-1	Un_Marine Benthic Group D and DHVEG-1	Un_Marine Benthic Group D and DHVEG-1		0	0	0	0	0	0	0	0	0	0	0	0	0	62	0	0	0	0	0	0	0	0	0	0	0	0	0	0	0	30	0	0	0	0	0	0	0	0	0	0	0
A_ASV01413	Archaea	Asgardarchaeota	Lokiarchaeia	Lokiarchaeia	Lokiarchaeia	Lokiarchaeia	Lokiarchaeia		0	0	0	0	0	0	0	0	0	0	0	0	0	0	0	0	0	0	106	0	0	0	0	0	0	0	0	0	0	0	0	0	0	0	0	0	0	0	0	0	0
A_ASV01416	Archaea	Crenarchaeota	Bathyarchaeia	Un_Bathyarchaeia	Un_Bathyarchaeia	Un_Bathyarchaeia	Un_Bathyarchaeia		0	0	0	0	0	0	0	0	0	0	0	0	0	0	0	0	0	0	0	0	0	0	106	0	0	0	0	0	0	0	0	0	0	0	0	0	0	0	0	0	0
A_ASV01420	Archaea	Crenarchaeota	Bathyarchaeia	Un_Bathyarchaeia	Un_Bathyarchaeia	Un_Bathyarchaeia	Un_Bathyarchaeia		0	0	0	0	0	0	0	0	0	0	0	0	0	0	0	0	0	0	0	0	0	0	0	0	0	0	0	0	0	0	0	0	0	0	0	106	0	0	0	0	0
A_ASV01415	Archaea	Crenarchaeota	Nitrososphaeria	Nitrosopumilales	Nitrosopumilaceae	Un_Nitrosopumilaceae	Un_Nitrosopumilaceae		0	0	0	0	0	0	0	0	0	0	0	0	0	0	0	0	0	0	0	106	0	0	0	0	0	0	0	0	0	0	0	0	0	0	0	0	0	0	0	0	0
A_ASV01418	Archaea	Euryarchaeota	Methanobacteria	Methanobacteriales	Methanobacteriaceae	Methanobacterium	Methanobacterium		0	0	0	0	0	0	0	0	0	0	0	0	0	0	0	0	0	0	0	0	0	0	0	0	0	0	0	0	0	48	58	0	0	0	0	0	0	0	0	0	0
A_ASV01411	Archaea	Thermoplasmatota	Thermoplasmata	Marine Benthic Group D and DHVEG-1	Un_Marine Benthic Group D and DHVEG-1	Un_Marine Benthic Group D and DHVEG-1	Un_Marine Benthic Group D and DHVEG-1		0	0	0	0	0	0	106	0	0	0	0	0	0	0	0	0	0	0	0	0	0	0	0	0	0	0	0	0	0	0	0	0	0	0	0	0	0	0	0	0	0
A_ASV01421	Archaea	Thermoplasmatota	Thermoplasmata	Marine Benthic Group D and DHVEG-1	Un_Marine Benthic Group D and DHVEG-1	Un_Marine Benthic Group D and DHVEG-1	Un_Marine Benthic Group D and DHVEG-1		0	0	0	0	0	0	0	0	0	0	0	0	0	0	0	0	0	0	0	0	0	0	0	0	0	0	0	0	0	0	0	0	0	0	0	0	0	0	0	0	0
A_ASV01423	Archaea	Nanoarchaeota	Nanoarchaeia	Woesearchaeales	Un_Woesearchaeales	Un_Woesearchaeales	Un_Woesearchaeales		0	22	8	0	0	0	0	0	0	0	0	0	0	0	0	0	0	0	0	0	0	0	0	0	0	0	0	0	0	0	0	0	0	0	0	0	27	34	14	0	0
A_ASV01428	Archaea	Nanoarchaeota	Nanoarchaeia	Woesearchaeales	Un_Woesearchaeales	Un_Woesearchaeales	Un_Woesearchaeales		0	0	0	0	0	0	0	0	0	0	0	0	0	0	0	0	0	0	0	0	0	0	0	0	0	0	0	0	0	0	0	0	0	0	0	0	0	0	16	45	0
A_ASV01424	Archaea	Thermoplasmatota	Thermoplasmata	Marine Benthic Group D and DHVEG-1	Un_Marine Benthic Group D and DHVEG-1	Un_Marine Benthic Group D and DHVEG-1	Un_Marine Benthic Group D and DHVEG-1		0	0	0	0	0	0	0	0	0	0	0	0	0	0	0	0	0	46	0	0	0	0	0	0	0	0	0	0	0	0	0	0	0	0	0	0	0	0	0	0	0
A_ASV01438	Archaea	Asgardarchaeota	Lokiarchaeia	Lokiarchaeia	Lokiarchaeia	Lokiarchaeia	Lokiarchaeia		0	0	0	0	0	0	0	0	0	0	0	0	0	0	0	0	0	0	0	0	0	0	0	0	0	0	0	0	0	0	0	0	0	0	0	104	0	0	0	0	0
A_ASV01434	Archaea	Crenarchaeota	Bathyarchaeia	Un_Bathyarchaeia	Un_Bathyarchaeia	Un_Bathyarchaeia	Un_Bathyarchaeia		0	0	0	0	0	0	0	0	0	0	0	0	0	0	0	0	0	0	92	0	0	0	0	0	0	0	0	12	0	0	0	0	0	0	0	0	0	0	0	0	0
A_ASV01439	Archaea	Crenarchaeota	Bathyarchaeia	Un_Bathyarchaeia	Un_Bathyarchaeia	Un_Bathyarchaeia	Un_Bathyarchaeia		0	0	0	0	0	0	0	0	0	0	0	0	0	0	0	0	0	0	0	0	0	0	0	0	0	0	0	0	0	0	0	0	0	0	0	104	0	0	0	0	0
A_ASV01432	Archaea	Thermoplasmatota	Thermoplasmata	Un_Thermoplasmata	Un_Thermoplasmata	Un_Thermoplasmata	Un_Thermoplasmata		0	0	0	0	18	0	0	57	0	0	0	0	0	0	0	0	0	0	0	0	0	0	0	0	0	0	0	0	0	0	0	0	0	0	0	0	0	0	0	0	0
A_ASV01446	Archaea	Crenarchaeota	Bathyarchaeia	Un_Bathyarchaeia	Un_Bathyarchaeia	Un_Bathyarchaeia	Un_Bathyarchaeia		0	0	0	0	0	0	0	0	0	0	0	0	0	0	0	0	0	0	0	0	0	0	0	103	0	0	0	0	0	0	0	0	0	0	0	0	0	0	0	0	0
A_ASV01448	Archaea	Crenarchaeota	Nitrososphaeria	Nitrosopumilales	Nitrosopumilaceae	Candidatus Nitrosopumilus	Un_Candidatus Nitrosopumilus		0	0	0	0	0	0	0	0	0	0	0	0	0	0	0	0	0	0	0	0	0	0	0	0	0	0	0	0	0	103	0	0	0	0	0	0	0	0	0	0	0
A_ASV01450	Archaea	Nanoarchaeota	Nanoarchaeia	Woesearchaeales	Un_Woesearchaeales	Un_Woesearchaeales	Un_Woesearchaeales		0	0	0	0	0	0	0	0	0	0	0	0	0	0	0	0	0	0	0	0	0	0	0	0	0	0	0	0	0	0	0	0	0	0	103	0	0	0	0	0	0
A_ASV01441	Archaea	Thermoplasmatota	Thermoplasmata	Marine Benthic Group D and DHVEG-1	Un_Marine Benthic Group D and DHVEG-1	Un_Marine Benthic Group D and DHVEG-1	Un_Marine Benthic Group D and DHVEG-1		0	0	0	0	0	103	0	0	0	0	0	0	0	0	0	0	0	0	0	0	0	0	0	0	0	0	0	0	0	0	0	0	0	0	0	0	0	0	0	0	0
A_ASV01443	Archaea	Thermoplasmatota	Thermoplasmata	Marine Benthic Group D and DHVEG-1	Un_Marine Benthic Group D and DHVEG-1	Un_Marine Benthic Group D and DHVEG-1	Un_Marine Benthic Group D and DHVEG-1		0	0	0	0	0	0	31	0	0	0	0	0	0	0	0	0	28	0	0	0	0	0	0	0	0	0	0	0	0	0	0	0	44	0	0	0	0	0	0	0	0
A_ASV01454	Archaea	Asgardarchaeota	Lokiarchaeia	Lokiarchaeia	Lokiarchaeia	Lokiarchaeia	Lokiarchaeia		0	0	0	0	0	0	0	0	0	0	0	0	0	0	0	0	0	0	0	0	0	0	0	0	0	102	0	0	0	0	0	0	0	0	0	0	0	0	0	0	0
A_ASV01452	Archaea	Crenarchaeota	Bathyarchaeia	Un_Bathyarchaeia	Un_Bathyarchaeia	Un_Bathyarchaeia	Un_Bathyarchaeia		0	0	0	0	0	0	0	0	0	0	0	0	0	0	0	0	0	0	102	0	0	0	0	0	0	0	0	0	0	0	0	0	0	0	0	0	0	0	0	0	0
A_ASV01457	Archaea	Crenarchaeota	Bathyarchaeia	Un_Bathyarchaeia	Un_Bathyarchaeia	Un_Bathyarchaeia	Un_Bathyarchaeia		0	0	0	0	0	0	0	0	0	0	0	0	0	0	0	0	0	0	0	0	0	0	0	0	0	0	0	0	0	0	0	0	0	0	102	0	0	0	0	0	0
A_ASV01458	Archaea	Crenarchaeota	Bathyarchaeia	Un_Bathyarchaeia	Un_Bathyarchaeia	Un_Bathyarchaeia	Un_Bathyarchaeia		0	0	0	0	0	0	0	0	0	0	0	0	0	0	0	0	0	0	0	0	0	0	0	0	0	0	0	0	0	0	0	0	0	0	0	102	0	0	0	0	0
A_ASV01460	Archaea	Crenarchaeota	Nitrososphaeria	Nitrosopumilales	Nitrosopumilaceae	Un_Nitrosopumilaceae	Un_Nitrosopumilaceae		0	0	0	0	0	0	0	0	0	0	0	0	0	0	0	0	0	0	0	0	0	0	0	0	0	0	0	0	0	0	0	0	0	0	0	0	0	0	0	102	0
A_ASV01451	Archaea	Thermoplasmatota	Thermoplasmata	Un_Thermoplasmata	Un_Thermoplasmata	Un_Thermoplasmata	Un_Thermoplasmata		0	0	0	102	0	0	0	0	0	0	0	0	0	0	0	0	0	0	0	0	0	0	0	0	0	0	0	0	0	0	0	0	0	0	0	0	0	0	0	0	0
A_ASV01466	Archaea	Crenarchaeota	Bathyarchaeia	Un_Bathyarchaeia	Un_Bathyarchaeia	Un_Bathyarchaeia	Un_Bathyarchaeia		0	0	0	0	0	0	0	0	0	0	0	0	0	0	0	0	0	0	0	0	0	0	0	0	0	0	0	0	0	0	0	0	101	0	0	0	0	0	0	0	0
A_ASV01469	Archaea	Crenarchaeota	Bathyarchaeia	Un_Bathyarchaeia	Un_Bathyarchaeia	Un_Bathyarchaeia	Un_Bathyarchaeia		0	0	0	0	0	0	0	0	0	0	0	0	0	0	0	0	0	0	0	0	0	0	0	0	0	0	0	0	0	0	0	0	0	0	0	101	0	0	0	0	0
A_ASV01472	Archaea	Crenarchaeota	Nitrososphaeria	Nitrosopumilales	Nitrosopumilaceae	Cenarchaeum	Un_Cenarchaeum		0	0	0	0	0	0	0	0	0	0	0	0	0	0	0	0	0	0	0	0	0	0	0	0	0	0	0	0	0	0	0	0	0	0	0	0	0	0	0	101	0
A_ASV01467	Archaea	Crenarchaeota	Nitrososphaeria	Nitrososphaerales	Nitrososphaeraceae	Un_Nitrososphaeraceae	Un_Nitrososphaeraceae		0	0	0	0	0	0	0	0	0	0	0	0	0	0	0	0	0	0	0	0	0	0	0	0	0	0	0	0	0	0	0	0	0	0	101	0	0	0	0	0	0
A_ASV01461	Archaea	Un_Archaea	Un_Archaea	Un_Archaea	Un_Archaea	Un_Archaea	Un_Archaea		0	0	16	0	0	0	21	0	0	0	14	0	0	0	0	0	0	0	0	0	0	0	0	0	0	0	0	0	0	0	0	15	0	0	0	0	0	0	0	0	0
A_ASV01464	Archaea	Un_Archaea	Un_Archaea	Un_Archaea	Un_Archaea	Un_Archaea	Un_Archaea		0	0	0	0	0	0	0	0	0	0	23	0	0	0	0	0	0	0	0	0	0	0	0	0	0	0	0	0	0	0	0	0	0	78	0	0	0	0	0	0	0
A_ASV01468	Archaea	Nanoarchaeota	Nanoarchaeia	Woesearchaeales	Un_Woesearchaeales	Un_Woesearchaeales	Un_Woesearchaeales		0	0	0	0	0	0	0	0	0	0	0	0	0	0	0	0	0	0	0	0	0	0	0	0	0	0	0	0	0	0	0	0	0	0	101	0	0	0	0	0	0
A_ASV01462	Archaea	Nanoarchaeota	Nanoarchaeia	Woesearchaeales	Un_Woesearchaeales	Un_Woesearchaeales	Un_Woesearchaeales		0	0	0	0	0	0	0	56	0	0	0	0	0	0	45	0	0	0	0	0	0	0	0	0	0	0	0	0	0	0	0	0	0	0	0	0	0	0	0	0	0
A_ASV01463	Archaea	Thermoplasmatota	Thermoplasmata	Marine Benthic Group D and DHVEG-1	Un_Marine Benthic Group D and DHVEG-1	Un_Marine Benthic Group D and DHVEG-1	Un_Marine Benthic Group D and DHVEG-1		0	0	0	0	0	0	0	0	53	0	0	0	0	0	0	0	0	0	0	0	0	0	0	0	0	0	0	0	0	0	0	0	0	0	0	0	0	0	0	0	0
A_ASV01474	Archaea	Crenarchaeota	Bathyarchaeia	Un_Bathyarchaeia	Un_Bathyarchaeia	Un_Bathyarchaeia	Un_Bathyarchaeia		0	0	0	0	0	56	0	44	0	0	0	0	0	0	0	0	0	0	0	0	0	0	0	0	0	0	0	0	0	0	0	0	0	0	0	0	0	0	0	0	0
A_ASV01479	Archaea	Crenarchaeota	Bathyarchaeia	Un_Bathyarchaeia	Un_Bathyarchaeia	Un_Bathyarchaeia	Un_Bathyarchaeia		0	0	0	0	0	0	0	0	0	0	0	0	0	0	0	0	0	0	0	0	0	0	0	0	0	0	0	0	0	0	0	0	0	0	100	0	0	0	0	0	0
A_ASV01480	Archaea	Crenarchaeota	Bathyarchaeia	Un_Bathyarchaeia	Un_Bathyarchaeia	Un_Bathyarchaeia	Un_Bathyarchaeia		0	0	0	0	0	0	0	0	0	0	0	0	0	0	0	0	0	0	0	0	0	0	0	0	0	0	0	0	0	0	0	0	0	0	0	0	0	0	0	0	0
A_ASV01477	Archaea	Nanoarchaeota	Nanoarchaeia	Woesearchaeales	Un_Woesearchaeales	Un_Woesearchaeales	Un_Woesearchaeales		0	0	0	0	0	0	0	0	0	0	0	0	0	0	35	0	0	0	0	0	0	0	0	0	0	0	0	0	0	0	0	0	0	65	0	0	0	0	0	0	0
A_ASV01475	Archaea	Thermoplasmatota	Thermoplasmata	Marine Benthic Group D and DHVEG-1	Un_Marine Benthic Group D and DHVEG-1	Un_Marine Benthic Group D and DHVEG-1	Un_Marine Benthic Group D and DHVEG-1		0	0	0	0	0	26	17	0	0	0	0	0	44	0	0	0	13	0	0	0	0	0	0	0	0	0	0	0	0	0	0	0	0	0	0	0	0	0	0	0	0
A_ASV01487	Archaea	Crenarchaeota	Bathyarchaeia	Un_Bathyarchaeia	Un_Bathyarchaeia	Un_Bathyarchaeia	Un_Bathyarchaeia		0	0	0	0	0	0	0	0	0	0	0	0	0	0	0	0	0	0	0	0	0	0	0	0	0	0	0	0	0	0	0	0	0	0	0	0	0	0	0	22	48
A_ASV01486	Archaea	Crenarchaeota	Bathyarchaeia	Un_Bathyarchaeia	Un_Bathyarchaeia	Un_Bathyarchaeia	Un_Bathyarchaeia		0	0	0	0	0	0	0	0	0	0	0	0	0	0	0	0	0	0	0	0	0	0	0	0	0	0	0	0	0	0	0	0	0	0	0	99	0	0	0	0	0
A_ASV01484	Archaea	Nanoarchaeota	Nanoarchaeia	Woesearchaeales	Un_Woesearchaeales	Un_Woesearchaeales	Un_Woesearchaeales		0	0	0	0	0	0	0	0	0	0	0	0	0	0	0	0	0	0	0	0	0	0	0	0	0	0	0	0	0	0	0	23	76	0	0	0	0	0	0	0	0
A_ASV01492	Archaea	Crenarchaeota	Bathyarchaeia	Un_Bathyarchaeia	Un_Bathyarchaeia	Un_Bathyarchaeia	Un_Bathyarchaeia		0	0	0	0	0	0	0	0	0	0	0	0	0	0	0	0	0	0	0	0	0	98	0	0	0	0	0	0	0	0	0	0	0	0	0	0	0	0	0	0	0
A_ASV01489	Archaea	Crenarchaeota	Un_Crenarchaeota	Un_Crenarchaeota	Un_Crenarchaeota	Un_Crenarchaeota	Un_Crenarchaeota		0	0	0	0	0	0	0	9	71	0	0	0	0	0	0	0	0	0	0	0	0	0	0	0	0	0	0	8	0	10	0	0	0	0	0	0	0	0	0	0	0
A_ASV01488	Archaea	Nanoarchaeota	Nanoarchaeia	Woesearchaeales	Un_Woesearchaeales	Un_Woesearchaeales	Un_Woesearchaeales		0	98	0	0	0	0	0	0	0	0	0	0	0	0	0	0	0	0	0	0	0	0	0	0	0	0	0	0	0	0	0	0	0	0	0	0	0	0	0	0	0
A_ASV01491	Archaea	Nanoarchaeota	Nanoarchaeia	Woesearchaeales	Un_Woesearchaeales	Un_Woesearchaeales	Un_Woesearchaeales		0	0	0	0	0	0	0	0	0	0	0	10	31	8	0	0	0	0	49	0	0	0	0	0	0	0	0	0	0	0	0	0	0	0	0	0	0	0	0	0	0
A_ASV01496	Archaea	Thermoplasmatota	Thermoplasmata	Marine Benthic Group D and DHVEG-1	Un_Marine Benthic Group D and DHVEG-1	Un_Marine Benthic Group D and DHVEG-1	Un_Marine Benthic Group D and DHVEG-1		0	0	0	0	0	0	0	0	0	0	0	0	0	0	0	0	0	0	0	0	0	0	0	0	0	0	0	0	0	0	0	0	0	0	0	0	0	0	0	98	0
A_ASV01497	Archaea	Thermoplasmatota	Thermoplasmata	Marine Benthic Group D and DHVEG-1	Un_Marine Benthic Group D and DHVEG-1	Un_Marine Benthic Group D and DHVEG-1	Un_Marine Benthic Group D and DHVEG-1		0	0	0	0	0	0	0	0	0	0	0	0	0	0	0	0	0	0	0	0	0	0	0	0	0	0	0	0	0	0	0	0	0	0	0	0	0	0	0	0	0
A_ASV01498	Archaea	Crenarchaeota	Bathyarchaeia	Un_Bathyarchaeia	Un_Bathyarchaeia	Un_Bathyarchaeia	Un_Bathyarchaeia		28	0	0	0	0	0	0	0	0	0	0	0	0	69	0	0	0	0	0	0	0	0	0	0	0	0	0	0	0	0	0	0	0	0	0	0	0	0	0	0	0
A_ASV01507	Archaea	Crenarchaeota	Bathyarchaeia	Un_Bathyarchaeia	Un_Bathyarchaeia	Un_Bathyarchaeia	Un_Bathyarchaeia		0	0	0	0	0	0	0	0	0	0	0	0	0	0	0	0	0	0	0	0	0	97	0	0	0	0	0	0	0	0	0	0	0	0	0	0	0	0	0	0	0
A_ASV01510	Archaea	Crenarchaeota	Bathyarchaeia	Un_Bathyarchaeia	Un_Bathyarchaeia	Un_Bathyarchaeia	Un_Bathyarchaeia		0	0	0	0	0	0	0	0	0	0	0	0	0	0	0	0	0	0	0	0	0	0	0	97	0	0	0	0	0	0	0	0	0	0	0	0	0	0	0	0	0
A_ASV01512	Archaea	Crenarchaeota	Bathyarchaeia	Un_Bathyarchaeia	Un_Bathyarchaeia	Un_Bathyarchaeia	Un_Bathyarchaeia		0	0	0	0	0	0	0	0	0	0	0	0	0	0	0	0	0	0	0	0	0	0	0	0	0	0	97	0	0	0	0	0	0	0	0	0	0	0	0	0	0
A_ASV01517	Archaea	Crenarchaeota	Bathyarchaeia	Un_Bathyarchaeia	Un_Bathyarchaeia	Un_Bathyarchaeia	Un_Bathyarchaeia		0	0	0	0	0	0	0	0	0	0	0	0	0	0	0	0	0	0	0	0	0	0	0	0	0	0	0	0	0	0	0	0	0	0	0	97	0	0	0	0	0
A_ASV01518	Archaea	Crenarchaeota	Bathyarchaeia	Un_Bathyarchaeia	Un_Bathyarchaeia	Un_Bathyarchaeia	Un_Bathyarchaeia		0	0	0	0	0	0	0	0	0	0	0	0	0	0	0	0	0	0	0	0	0	0	0	0	0	0	0	0	0	0	0	0	0	0	0	97	0	0	0	0	0
A_ASV01519	Archaea	Crenarchaeota	Bathyarchaeia	Un_Bathyarchaeia	Un_Bathyarchaeia	Un_Bathyarchaeia	Un_Bathyarchaeia		0	0	0	0	0	0	0	0	0	0	0	0	0	0	0	0	0	0	0	0	0	0	0	0	0	0	0	0	0	0	0	0	0	0	0	97	0	0	0	0	0
A_ASV01515	Archaea	Crenarchaeota	Bathyarchaeia	Un_Bathyarchaeia	Un_Bathyarchaeia	Un_Bathyarchaeia	Un_Bathyarchaeia		0	0	0	0	0	0	0	0	0	0	0	0	0	0	0	0	0	0	0	0	0	0	0	0	0	0	0	0	0	0	0	0	0	0	97	0	0	0	0	0	0
A_ASV01520	Archaea	Crenarchaeota	Nitrososphaeria	Nitrosopumilales	Nitrosopumilaceae	Un_Nitrosopumilaceae	Un_Nitrosopumilaceae		0	0	0	0	0	0	0	0	0	0	0	0	0	0	0	0	0	0	0	0	0	0	0	0	0	0	0	0	0	0	0	0	0	0	0	0	0	0	42	23	0
A_ASV01521	Archaea	Un_Archaea	Un_Archaea	Un_Archaea	Un_Archaea	Un_Archaea	Un_Archaea		0	0	0	0	0	0	0	0	0	0	0	0	0	0	0	0	0	0	0	0	0	0	0	0	0	0	0	0	0	0	0	0	0	0	0	0	0	0	0	97	0
A_ASV01501	Archaea	Nanoarchaeota	Nanoarchaeia	Woesearchaeales	Un_Woesearchaeales	Un_Woesearchaeales	Un_Woesearchaeales		0	30	0	0	0	0	0	0	0	0	0	0	0	0	0	0	0	0	67	0	0	0	0	0	0	0	0	0	0	0	0	0	0	0	0	0	0	0	0	0	0
A_ASV01504	Archaea	Thermoplasmatota	Thermoplasmata	Marine Benthic Group D and DHVEG-1	Un_Marine Benthic Group D and DHVEG-1	Un_Marine Benthic Group D and DHVEG-1	Un_Marine Benthic Group D and DHVEG-1		0	0	0	0	0	0	0	0	97	0	0	0	0	0	0	0	0	0	0	0	0	0	0	0	0	0	0	0	0	0	0	0	0	0	0	0	0	0	0	0	0
A_ASV01514	Archaea	Thermoplasmatota	Thermoplasmata	Marine Benthic Group D and DHVEG-1	Un_Marine Benthic Group D and DHVEG-1	Un_Marine Benthic Group D and DHVEG-1	Un_Marine Benthic Group D and DHVEG-1		0	0	0	0	0	0	0	0	0	0	0	0	0	0	0	0	0	0	0	0	0	0	0	0	0	0	0	0	0	0	0	0	0	97	0	0	0	0	0	0	0
A_ASV01516	Archaea	Thermoplasmatota	Thermoplasmata	Marine Benthic Group D and DHVEG-1	Un_Marine Benthic Group D and DHVEG-1	Un_Marine Benthic Group D and DHVEG-1	Un_Marine Benthic Group D and DHVEG-1		0	0	0	0	0	0	0	0	0	0	0	0	0	0	0	0	0	0	0	0	0	0	0	0	0	0	0	0	0	0	0	0	0	0	0	97	0	0	0	0	0
A_ASV01522	Archaea	Crenarchaeota	Bathyarchaeia	Un_Bathyarchaeia	Un_Bathyarchaeia	Un_Bathyarchaeia	Un_Bathyarchaeia		0	0	0	0	0	0	0	0	0	0	0	0	0	0	0	0	0	0	96	0	0	0	0	0	0	0	0	0	0	0	0	0	0	0	0	0	0	0	0	0	0
A_ASV01524	Archaea	Crenarchaeota	Bathyarchaeia	Un_Bathyarchaeia	Un_Bathyarchaeia	Un_Bathyarchaeia	Un_Bathyarchaeia		0	0	0	0	0	0	0	0	0	0	0	0	0	0	0	0	0	0	0	0	0	0	0	0	0	0	0	25	0	0	0	0	0	61	0	0	0	0	0	0	0
A_ASV01525	Archaea	Crenarchaeota	Bathyarchaeia	Un_Bathyarchaeia	Un_Bathyarchaeia	Un_Bathyarchaeia	Un_Bathyarchaeia		0	0	0	0	0	0	0	0	0	0	0	0	0	0	0	0	0	0	0	0	0	0	0	0	0	0	0	0	0	0	96	0	0	0	0	0	0	0	0	0	0
A_ASV01526	Archaea	Crenarchaeota	Bathyarchaeia	Un_Bathyarchaeia	Un_Bathyarchaeia	Un_Bathyarchaeia	Un_Bathyarchaeia		0	0	0	0	0	0	0	0	0	0	0	0	0	0	0	0	0	0	0	0	0	0	0	0	0	0	0	0	0	0	56	40	0	0	0	0	0	0	0	0	0
A_ASV01527	Archaea	Crenarchaeota	Bathyarchaeia	Un_Bathyarchaeia	Un_Bathyarchaeia	Un_Bathyarchaeia	Un_Bathyarchaeia		0	0	0	0	0	0	0	0	0	0	0	0	0	0	0	0	0	0	0	0	0	0	0	0	0	0	0	0	0	0	0	0	0	96	0	0	0	0	0	0	0
A_ASV01531	Archaea	Un_Archaea	Un_Archaea	Un_Archaea	Un_Archaea	Un_Archaea	Un_Archaea		0	0	0	0	0	0	0	43	0	0	0	0	0	0	0	0	0	0	52	0	0	0	0	0	0	0	0	0	0	0	0	0	0	0	0	0	0	0	0	0	0
A_ASV01533	Archaea	Nanoarchaeota	Nanoarchaeia	Woesearchaeales	Un_Woesearchaeales	Un_Woesearchaeales	Un_Woesearchaeales		0	0	0	0	0	0	0	0	0	0	0	0	0	0	0	0	0	0	0	0	0	0	0	0	0	0	0	29	66	0	0	0	0	0	0	0	0	0	0	0	0
A_ASV01532	Archaea	Nanoarchaeota	Nanoarchaeia	Woesearchaeales	Un_Woesearchaeales	Un_Woesearchaeales	Un_Woesearchaeales		0	0	0	0	0	0	0	0	0	0	0	0	14	0	0	0	0	0	0	0	0	0	0	0	0	0	0	0	0	0	0	0	0	0	0	0	0	0	0	81	0
A_ASV01535	Archaea	Nanoarchaeota	Nanoarchaeia	Woesearchaeales	Un_Woesearchaeales	Un_Woesearchaeales	Un_Woesearchaeales		0	0	0	0	0	0	0	0	0	0	0	0	0	0	0	0	0	0	0	0	0	0	0	0	0	0	0	0	0	0	0	0	0	0	95	0	0	0	0	0	0
A_ASV01552	Archaea	Crenarchaeota	Bathyarchaeia	Un_Bathyarchaeia	Un_Bathyarchaeia	Un_Bathyarchaeia	Un_Bathyarchaeia		0	0	0	0	0	0	0	0	0	0	0	0	0	0	0	0	0	0	0	0	0	0	0	0	0	0	0	0	0	0	0	0	0	0	0	94	0	0	0	0	0
A_ASV01542	Archaea	Un_Archaea	Un_Archaea	Un_Archaea	Un_Archaea	Un_Archaea	Un_Archaea		0	0	0	0	0	0	0	83	0	0	0	0	0	0	0	0	0	0	0	0	0	0	0	0	0	0	0	0	0	0	0	0	0	0	0	0	0	0	0	0	11
A_ASV01539	Archaea	Un_Archaea	Un_Archaea	Un_Archaea	Un_Archaea	Un_Archaea	Un_Archaea		0	0	0	18	0	0	0	0	0	0	0	0	0	0	18	10	23	12	0	0	0	0	0	0	0	0	0	0	0	13	0	0	0	0	0	0	0	0	0	0	0
A_ASV01547	Archaea	Nanoarchaeota	Nanoarchaeia	Woesearchaeales	Un_Woesearchaeales	Un_Woesearchaeales	Un_Woesearchaeales		0	0	0	0	0	0	0	0	0	0	0	0	0	0	0	0	0	0	64	0	0	0	0	0	0	0	0	0	0	30	0	0	0	0	0	0	0	0	0	0	0
A_ASV01555	Archaea	Crenarchaeota	Bathyarchaeia	Un_Bathyarchaeia	Un_Bathyarchaeia	Un_Bathyarchaeia	Un_Bathyarchaeia		0	7	0	0	0	0	0	0	86	0	0	0	0	0	0	0	0	0	0	0	0	0	0	0	0	0	0	0	0	0	0	0	0	0	0	0	0	0	0	0	0
A_ASV01556	Archaea	Crenarchaeota	Bathyarchaeia	Un_Bathyarchaeia	Un_Bathyarchaeia	Un_Bathyarchaeia	Un_Bathyarchaeia		0	0	0	0	0	0	34	0	0	0	0	0	0	0	0	0	0	0	0	0	0	0	0	0	0	0	0	0	0	0	0	0	0	0	0	0	0	0	0	59	0
A_ASV01563	Archaea	Crenarchaeota	Bathyarchaeia	Un_Bathyarchaeia	Un_Bathyarchaeia	Un_Bathyarchaeia	Un_Bathyarchaeia		0	0	0	0	0	0	0	0	0	0	0	0	0	0	0	0	0	0	0	0	0	0	0	0	0	0	0	0	0	0	0	0	0	93	0	0	0	0	0	0	0
A_ASV01565	Archaea	Crenarchaeota	Bathyarchaeia	Un_Bathyarchaeia	Un_Bathyarchaeia	Un_Bathyarchaeia	Un_Bathyarchaeia		0	0	0	0	0	0	0	0	0	0	0	0	0	0	0	0	0	0	0	0	0	0	0	0	0	0	0	0	0	0	0	0	0	93	0	0	0	0	0	0	0
A_ASV01564	Archaea	Nanoarchaeota	Nanoarchaeia	Woesearchaeales	Un_Woesearchaeales	Un_Woesearchaeales	Un_Woesearchaeales		0	0	0	0	0	0	0	0	0	0	0	0	0	0	0	0	0	0	0	0	0	0	0	0	0	0	0	0	0	0	0	0	0	93	0	0	0	0	0	0	0
A_ASV01560	Archaea	Nanoarchaeota	Nanoarchaeia	Woesearchaeales	Un_Woesearchaeales	Un_Woesearchaeales	Un_Woesearchaeales		0	0	0	0	0	0	0	0	0	0	0	0	0	14	0	0	0	0	0	0	0	0	0	0	0	0	0	0	33	0	46	0	0	0	0	0	0	0	0	0	0
A_ASV01559	Archaea	Nanoarchaeota	Nanoarchaeia	Woesearchaeales	Un_Woesearchaeales	Un_Woesearchaeales	Un_Woesearchaeales		0	0	0	0	0	0	0	0	0	0	24	22	0	0	0	0	0	0	47	0	0	0	0	0	0	0	0	0	0	0	0	0	0	0	0	0	0	0	0	0	0
A_ASV01557	Archaea	Thermoplasmatota	Thermoplasmata	Marine Benthic Group D and DHVEG-1	Un_Marine Benthic Group D and DHVEG-1	Un_Marine Benthic Group D and DHVEG-1	Un_Marine Benthic Group D and DHVEG-1		0	0	0	0	0	0	0	0	93	0	0	0	0	0	0	0	0	0	0	0	0	0	0	0	0	0	0	0	0	0	0	0	0	0	0	0	0	0	0	0	0
A_ASV01573	Archaea	Crenarchaeota	Bathyarchaeia	Un_Bathyarchaeia	Un_Bathyarchaeia	Un_Bathyarchaeia	Un_Bathyarchaeia		0	0	0	0	0	0	0	0	0	0	0	0	0	0	0	0	0	0	0	0	0	0	0	0	0	0	0	0	0	0	0	0	0	92	0	0	0	0	0	0	0
A_ASV01576	Archaea	Crenarchaeota	Bathyarchaeia	Un_Bathyarchaeia	Un_Bathyarchaeia	Un_Bathyarchaeia	Un_Bathyarchaeia		0	0	0	0	0	0	0	0	0	0	0	0	0	0	0	0	0	0	0	0	0	0	0	0	0	0	0	0	0	0	0	0	0	0	58	0	0	0	0	34	0
A_ASV01572	Archaea	Halobacterota	Methanosarcinia	Methanosarciniales	Methanosarcinaceae	Methanosarcina	Un_Methanosarcina		0	0	0	0	0	0	0	0	0	0	0	0	0	0	0	0	0	0	0	0	0	0	0	0	0	0	0	0	0	0	0	0	0	92	0	0	0	0	0	0	0
A_ASV01568	Archaea	Un_Archaea	Un_Archaea	Un_Archaea	Un_Archaea	Un_Archaea	Un_Archaea		0	0	0	0	0	0	0	0	0	0	0	0	0	85	0	0	0	0	7	0	0	0	0	0	0	0	0	0	0	0	0	0	0	0	0	0	0	0	0	0	0
A_ASV01574	Archaea	Un_Archaea	Un_Archaea	Un_Archaea	Un_Archaea	Un_Archaea	Un_Archaea		0	0	0	0	0	0	0	0	0	0	0	0	0	0	0	0	0	0	0	0	0	0	0	0	0	0	0	0	0	0	0	0	0	0	92	0	0	0	0	0	0
A_ASV01567	Archaea	Nanoarchaeota	Nanoarchaeia	Woesearchaeales	Un_Woesearchaeales	Un_Woesearchaeales	Un_Woesearchaeales		0	0	0	0	0	0	0	0	0	0	9	0	0	0	0	0	0	0	76	0	0	0	0	0	0	0	0	7	0	0	0	0	0	0	0	0	0	0	0	0	0
A_ASV01575	Archaea	Thermoplasmatota	Thermoplasmata	Marine Benthic Group D and DHVEG-1	Un_Marine Benthic Group D and DHVEG-1	Un_Marine Benthic Group D and DHVEG-1	Un_Marine Benthic Group D and DHVEG-1		0	0	0	0	0	0	0	0	0	0	0	0	0	0	0	0	0	0	0	0	0	0	0	0	0	0	0	0	0	0	0	0	0	0	92	0	0	0	0	0	0
A_ASV01578	Archaea	Thermoplasmatota	Thermoplasmata	Marine Benthic Group D and DHVEG-1	Un_Marine Benthic Group D and DHVEG-1	Un_Marine Benthic Group D and DHVEG-1	Un_Marine Benthic Group D and DHVEG-1		0	0	0	0	0	0	0	0	0	0	0	0	0	0	0	0	0	0	0	0	0	0	0	0	0	0	0	0	0	0	0	0	0	0	0	0	0	0	0	0	0
A_ASV01584	Archaea	Asgardarchaeota	Lokiarchaeia	Lokiarchaeia	Lokiarchaeia	Lokiarchaeia	Lokiarchaeia		0	0	0	0	0	0	49	0	0	0	0	0	0	0	0	0	0	0	0	0	0	0	0	0	0	0	0	0	0	0	0	0	0	0	0	0	0	0	0	0	0
A_ASV01589	Archaea	Crenarchaeota	Bathyarchaeia	Un_Bathyarchaeia	Un_Bathyarchaeia	Un_Bathyarchaeia	Un_Bathyarchaeia		0	0	0	0	0	0	0	0	0	0	0	0	0	0	0	0	0	0	0	0	0	0	0	91	0	0	0	0	0	0	0	0	0	0	0	0	0	0	0	0	0
A_ASV01592	Archaea	Crenarchaeota	Bathyarchaeia	Un_Bathyarchaeia	Un_Bathyarchaeia	Un_Bathyarchaeia	Un_Bathyarchaeia		0	0	0	0	0	0	0	0	0	0	0	0	0	0	0	0	0	0	0	0	0	0	0	0	0	0	0	0	0	0	0	0	0	0	0	0	0	0	0	0	0
A_ASV01591	Archaea	Halobacterota	Methanosarcinia	Methanosarciniales	ANME-2a-2b	Un_ANME-2a-2b	Un_ANME-2a-2b		0	0	0	0	0	0	0	0	0	0	0	0	0	0	0	0	0	0	0	0	0	0	0	0	0	0	0	30	0	27	34	0	0	0	0	0	0	0	0	0	0
A_ASV01585	Archaea	Nanoarchaeota	Nanoarchaeia	Woesearchaeales	Un_Woesearchaeales	Un_Woesearchaeales	Un_Woesearchaeales		0	0	0	0	0	0	0	0	0	0	39	0	0	0	24	28	0	0	0	0	0	0	0	0	0	0	0	0	0	0	0	0	0	0	0	0	0	0	0	0	0
A_ASV01586	Archaea	Nanoarchaeota	Nanoarchaeia	Woesearchaeales	Un_Woesearchaeales	Un_Woesearchaeales	Un_Woesearchaeales		0	0	0	0	0	0	0	0	0	0	6	0	0	0	0	0	0	0	0	0	0	0	0	0	0	0	0	0	0	0	28	29	28	0	0	0	0	0	0	0	0
A_ASV01606	Archaea	Asgardarchaeota	Un_Asgardarchaeota	Un_Asgardarchaeota	Un_Asgardarchaeota	Un_Asgardarchaeota	Un_Asgardarchaeota		0	0	0	0	0	0	0	0	0	0	0	0	0	0	0	0	0	0	0	0	0	0	0	0	0	0	0	0	0	0	0	0	0	0	0	0	0	0	0	90	0
A_ASV01605	Archaea	Asgardarchaeota	Un_Asgardarchaeota	Un_Asgardarchaeota	Un_Asgardarchaeota	Un_Asgardarchaeota	Un_Asgardarchaeota		0	0	0	0	0	0	0	0	0	0	0	0	0	0	0	0	0	0	0	0	0	0	0	0	0	0	0	0	0	0	0	0	0	0	0	0	0	0	10	0	48
A_ASV01596	Archaea	Crenarchaeota	Bathyarchaeia	Un_Bathyarchaeia	Un_Bathyarchaeia	Un_Bathyarchaeia	Un_Bathyarchaeia		0	0	0	0	40	0	0	50	0	0	0	0	0	0	0	0	0	0	0	0	0	0	0	0	0	0	0	0	0	0	0	0	0	0	0	0	0	0	0	0	0
A_ASV01602	Archaea	Crenarchaeota	Bathyarchaeia	Un_Bathyarchaeia	Un_Bathyarchaeia	Un_Bathyarchaeia	Un_Bathyarchaeia		0	0	0	0	0	0	0	0	0	0	0	0	0	0	0	0	0	0	0	0	0	0	0	0	0	0	0	0	0	0	0	0	0	90	0	0	0	0	0	0	0
A_ASV01600	Archaea	Crenarchaeota	Bathyarchaeia	Un_Bathyarchaeia	Un_Bathyarchaeia	Un_Bathyarchaeia	Un_Bathyarchaeia		0	0	0	0	0	0	0	0	0	0	0	0	0	0	0	0	0	0	0	0	0	90	0	0	0	0	0	0	0	0	0	0	0	0	0	0	0	0	0	0	0
A_ASV01607	Archaea	Nanoarchaeota	Nanoarchaeia	Woesearchaeales	Un_Woesearchaeales	Un_Woesearchaeales	Un_Woesearchaeales		0	0	0	0	0	0	0	0	0	0	0	0	0	0	0	0	0	0	0	0	0	0	0	0	0	0	0	0	0	0	0	0	0	0	0	0	0	0	0	0	0
A_ASV01593	Archaea	Nanoarchaeota	Nanoarchaeia	Woesearchaeales	Un_Woesearchaeales	Un_Woesearchaeales	Un_Woesearchaeales		0	34	0	0	0	0	0	0	0	0	0	0	0	0	0	0	0	0	0	0	0	0	0	0	0	0	0	0	0	0	0	0	0	0	0	0	0	56	0	0	0
A_ASV01595	Archaea	Nanoarchaeota	Nanoarchaeia	Woesearchaeales	Un_Woesearchaeales	Un_Woesearchaeales	Un_Woesearchaeales		0	0	0	32	0	0	0	0	0	0	0	0	0	0	0	0	0	0	0	0	0	0	0	0	0	0	0	0	0	0	0	0	0	0	0	0	24	34	0	0	0
A_ASV01594	Archaea	Thermoplasmatota	Thermoplasmata	Un_Thermoplasmata	Un_Thermoplasmata	Un_Thermoplasmata	Un_Thermoplasmata		0	0	19	0	0	0	0	0	0	0	0	0	0	0	0	0	0	0	0	0	0	0	0	0	0	0	0	0	0	0	0	0	0	0	0	0	0	0	0	0	0
A_ASV01611	Archaea	Asgardarchaeota	Odinarchaeia	Un_Odinarchaeia	Un_Odinarchaeia	Un_Odinarchaeia	Un_Odinarchaeia		0	0	0	0	0	0	0	0	0	0	0	0	0	37	0	0	0	0	52	0	0	0	0	0	0	0	0	0	0	0	0	0	0	0	0	0	0	0	0	0	0
A_ASV01615	Archaea	Crenarchaeota	Bathyarchaeia	Un_Bathyarchaeia	Un_Bathyarchaeia	Un_Bathyarchaeia	Un_Bathyarchaeia		0	0	0	0	0	0	0	0	0	0	0	0	0	0	0	0	0	0	0	0	0	0	0	0	0	0	0	89	0	0	0	0	0	0	0	0	0	0	0	0	0
A_ASV01617	Archaea	Crenarchaeota	Bathyarchaeia	Un_Bathyarchaeia	Un_Bathyarchaeia	Un_Bathyarchaeia	Un_Bathyarchaeia		0	0	0	0	0	0	0	0	0	0	0	0	0	0	0	0	0	0	0	0	0	0	0	0	0	0	0	0	0	0	0	0	0	89	0	0	0	0	0	0	0
A_ASV01618	Archaea	Crenarchaeota	Bathyarchaeia	Un_Bathyarchaeia	Un_Bathyarchaeia	Un_Bathyarchaeia	Un_Bathyarchaeia		0	0	0	0	0	0	0	0	0	0	0	0	0	0	0	0	0	0	0	0	0	0	0	0	0	0	0	0	0	0	0	0	0	0	0	0	0	0	0	89	0
A_ASV01613	Archaea	Crenarchaeota	Nitrososphaeria	Nitrosopumilales	Nitrosopumilaceae	Candidatus Nitrosopumilus	Un_Candidatus Nitrosopumilus		0	0	0	0	0	0	0	0	0	0	0	0	0	0	0	0	0	0	0	0	0	89	0	0	0	0	0	0	0	0	0	0	0	0	0	0	0	0	0	0	0
A_ASV01608	Archaea	Un_Archaea	Un_Archaea	Un_Archaea	Un_Archaea	Un_Archaea	Un_Archaea		0	0	0	0	0	0	0	32	0	0	0	0	0	0	0	0	0	0	0	0	0	0	0	0	0	0	0	0	0	0	0	0	0	0	0	0	0	0	0	0	0
A_ASV01610	Archaea	Nanoarchaeota	Nanoarchaeia	Woesearchaeales	Un_Woesearchaeales	Un_Woesearchaeales	Un_Woesearchaeales		0	0	0	0	0	0	0	0	0	43	0	0	0	0	0	0	0	0	0	0	0	0	0	0	0	0	0	46	0	0	0	0	0	0	0	0	0	0	0	0	0
A_ASV01620	Archaea	Thermoplasmatota	Thermoplasmata	Un_Thermoplasmata	Un_Thermoplasmata	Un_Thermoplasmata	Un_Thermoplasmata		0	0	0	0	0	0	0	0	0	0	0	0	0	0	0	0	0	0	0	0	0	0	0	0	0	0	0	0	0	0	0	0	0	0	0	0	0	0	0	0	0
A_ASV01619	Archaea	Thermoplasmatota	Thermoplasmata	Un_Thermoplasmata	Un_Thermoplasmata	Un_Thermoplasmata	Un_Thermoplasmata		0	0	0	0	0	0	0	0	0	0	0	0	0	0	0	0	0	0	0	0	0	0	0	0	0	0	0	0	0	0	0	0	0	0	0	0	0	0	0	75	0
A_ASV01624	Archaea	Asgardarchaeota	Lokiarchaeia	Lokiarchaeia	Lokiarchaeia	Lokiarchaeia	Lokiarchaeia		0	0	0	0	0	0	0	0	0	0	0	0	0	0	0	50	0	0	0	0	0	0	0	0	0	0	0	0	0	0	0	0	0	0	0	0	0	0	0	0	0
A_ASV01623	Archaea	Crenarchaeota	Bathyarchaeia	Un_Bathyarchaeia	Un_Bathyarchaeia	Un_Bathyarchaeia	Un_Bathyarchaeia		0	0	0	0	0	0	0	88	0	0	0	0	0	0	0	0	0	0	0	0	0	0	0	0	0	0	0	0	0	0	0	0	0	0	0	0	0	0	0	0	0
A_ASV01625	Archaea	Crenarchaeota	Bathyarchaeia	Un_Bathyarchaeia	Un_Bathyarchaeia	Un_Bathyarchaeia	Un_Bathyarchaeia		0	0	0	0	0	0	0	0	0	0	0	0	0	0	0	0	0	0	0	0	0	88	0	0	0	0	0	0	0	0	0	0	0	0	0	0	0	0	0	0	0
A_ASV01626	Archaea	Crenarchaeota	Bathyarchaeia	Un_Bathyarchaeia	Un_Bathyarchaeia	Un_Bathyarchaeia	Un_Bathyarchaeia		0	0	0	0	0	0	0	0	0	0	0	0	0	0	0	0	0	0	0	0	0	88	0	0	0	0	0	0	0	0	0	0	0	0	0	0	0	0	0	0	0
A_ASV01627	Archaea	Crenarchaeota	Bathyarchaeia	Un_Bathyarchaeia	Un_Bathyarchaeia	Un_Bathyarchaeia	Un_Bathyarchaeia		0	0	0	0	0	0	0	0	0	0	0	0	0	0	0	0	0	0	0	0	0	0	0	0	88	0	0	0	0	0	0	0	0	0	0	0	0	0	0	0	0
A_ASV01631	Archaea	Crenarchaeota	Bathyarchaeia	Un_Bathyarchaeia	Un_Bathyarchaeia	Un_Bathyarchaeia	Un_Bathyarchaeia		0	0	0	0	0	0	0	0	0	0	0	0	0	0	0	0	0	0	0	0	0	0	0	0	0	0	0	0	0	0	0	0	0	0	88	0	0	0	0	0	0
A_ASV01629	Archaea	Halobacterota	Methanomicrobia	Methanomicrobiales	Methanomicrobiaceae	Un_Methanomicrobiaceae	Un_Methanomicrobiaceae		0	0	0	0	0	0	0	0	0	0	0	0	0	0	0	0	0	0	0	0	0	0	0	0	0	0	0	21	0	0	67	0	0	0	0	0	0	0	0	0	0
A_ASV01632	Archaea	Halobacterota	Methanosarcinia	Methanosarciniales	Methanosarcinaceae	Methanosarcina	Un_Methanosarcina		0	0	0	0	0	0	0	0	0	0	0	0	0	0	0	0	0	0	0	0	0	0	0	0	0	0	0	0	0	0	0	0	0	0	0	88	0	0	0	0	0
A_ASV01646	Archaea	Asgardarchaeota	Lokiarchaeia	Lokiarchaeia	Lokiarchaeia	Lokiarchaeia	Lokiarchaeia		0	0	0	0	0	0	0	0	0	0	0	0	0	0	0	0	0	0	0	0	0	0	0	0	0	0	0	0	0	0	0	0	0	0	0	0	0	0	0	0	0
A_ASV01635	Archaea	Asgardarchaeota	Un_Asgardarchaeota	Un_Asgardarchaeota	Un_Asgardarchaeota	Un_Asgardarchaeota	Un_Asgardarchaeota		0	0	0	0	0	0	49	0	0	0	0	0	0	38	0	0	0	0	0	0	0	0	0	0	0	0	0	0	0	0	0	0	0	0	0	0	0	0	0	0	0
A_ASV01636	Archaea	Crenarchaeota	Bathyarchaeia	Un_Bathyarchaeia	Un_Bathyarchaeia	Un_Bathyarchaeia	Un_Bathyarchaeia		0	0	0	0	0	0	0	26	0	0	0	0	0	0	0	0	0	0	0	0	0	0	0	0	0	0	0	0	0	0	0	0	0	0	0	0	0	0	0	0	0
A_ASV01637	Archaea	Crenarchaeota	Bathyarchaeia	Un_Bathyarchaeia	Un_Bathyarchaeia	Un_Bathyarchaeia	Un_Bathyarchaeia		0	0	0	0	0	0	0	0	87	0	0	0	0	0	0	0	0	0	0	0	0	0	0	0	0	0	0	0	0	0	0	0	0	0	0	0	0	0	0	0	0
A_ASV01641	Archaea	Crenarchaeota	Bathyarchaeia	Un_Bathyarchaeia	Un_Bathyarchaeia	Un_Bathyarchaeia	Un_Bathyarchaeia		0	0	0	0	0	0	0	0	0	0	0	0	0	0	0	0	0	0	0	0	0	0	0	0	0	0	0	0	0	0	0	0	0	0	87	0	0	0	0	0	0
A_ASV01644	Archaea	Crenarchaeota	Bathyarchaeia	Un_Bathyarchaeia	Un_Bathyarchaeia	Un_Bathyarchaeia	Un_Bathyarchaeia		0	0	0	0	0	0	0	0	0	0	0	0	0	0	0	0	0	0	0	0	0	0	0	0	0	0	0	0	0	0	0	0	0	0	0	0	0	0	0	0	87
A_ASV01645	Archaea	Crenarchaeota	Bathyarchaeia	Un_Bathyarchaeia	Un_Bathyarchaeia	Un_Bathyarchaeia	Un_Bathyarchaeia		0	0	0	0	0	0	0	0	0	0	0	0	0	0	0	0	0	0	0	0	0	0	0	0	0	0	0	0	0	0	0	0	0	0	0	0	0	0	0	0	0
A_ASV01634	Archaea	Nanoarchaeota	Nanoarchaeia	Woesearchaeales	Un_Woesearchaeales	Un_Woesearchaeales	Un_Woesearchaeales		0	37	0	0	30	0	20	0	0	0	0	0	0	0	0	0	0	0	0	0	0	0	0	0	0	0	0	0	0	0	0	0	0	0	0	0	0	0	0	0	0
A_ASV01639	Archaea	Nanoarchaeota	Nanoarchaeia	Woesearchaeales	Un_Woesearchaeales	Un_Woesearchaeales	Un_Woesearchaeales		0	0	0	0	0	0	0	0	0	0	0	0	0	0	0	0	0	0	0	0	0	0	0	0	0	0	0	0	87	0	0	0	0	0	0	0	0	0	0	0	0
A_ASV01643	Archaea	Nanoarchaeota	Nanoarchaeia	Woesearchaeales	Un_Woesearchaeales	Un_Woesearchaeales	Un_Woesearchaeales		0	0	0	0	0	0	0	0	0	0	0	0	0	0	0	0	0	0	0	0	0	0	0	0	0	0	0	0	0	0	0	0	0	0	0	0	0	87	0	0	0
A_ASV01640	Archaea	Thermoplasmatota	Thermoplasmata	Marine Benthic Group D and DHVEG-1	Un_Marine Benthic Group D and DHVEG-1	Un_Marine Benthic Group D and DHVEG-1	Un_Marine Benthic Group D and DHVEG-1		0	0	0	0	0	0	0	0	0	0	0	0	0	0	0	0	0	0	0	0	0	0	0	0	0	0	0	0	0	0	0	0	0	87	0	0	0	0	0	0	0
A_ASV01651	Archaea	Asgardarchaeota	Un_Asgardarchaeota	Un_Asgardarchaeota	Un_Asgardarchaeota	Un_Asgardarchaeota	Un_Asgardarchaeota		0	0	0	0	0	0	0	0	0	0	0	0	44	0	0	0	0	0	22	0	0	0	0	0	0	0	0	0	20	0	0	0	0	0	0	0	0	0	0	0	0
A_ASV01658	Archaea	Asgardarchaeota	Un_Asgardarchaeota	Un_Asgardarchaeota	Un_Asgardarchaeota	Un_Asgardarchaeota	Un_Asgardarchaeota		0	0	0	0	0	0	0	0	0	0	0	0	0	0	0	0	0	0	0	0	0	0	0	0	0	0	0	0	0	0	0	0	0	0	0	86	0	0	0	0	0
A_ASV01649	Archaea	Crenarchaeota	Bathyarchaeia	Un_Bathyarchaeia	Un_Bathyarchaeia	Un_Bathyarchaeia	Un_Bathyarchaeia		0	0	0	0	0	0	0	31	0	0	0	0	0	0	0	0	0	0	0	0	0	0	0	0	0	0	0	0	0	0	0	0	0	0	0	0	0	0	0	0	55
A_ASV01653	Archaea	Crenarchaeota	Bathyarchaeia	Un_Bathyarchaeia	Un_Bathyarchaeia	Un_Bathyarchaeia	Un_Bathyarchaeia		0	0	0	0	0	0	0	0	0	0	0	0	0	0	0	0	0	0	0	0	0	0	0	0	0	86	0	0	0	0	0	0	0	0	0	0	0	0	0	0	0
A_ASV01654	Archaea	Crenarchaeota	Bathyarchaeia	Un_Bathyarchaeia	Un_Bathyarchaeia	Un_Bathyarchaeia	Un_Bathyarchaeia		0	0	0	0	0	0	0	0	0	0	0	0	0	0	0	0	0	0	0	0	0	0	0	0	0	0	86	0	0	0	0	0	0	0	0	0	0	0	0	0	0
A_ASV01657	Archaea	Crenarchaeota	Bathyarchaeia	Un_Bathyarchaeia	Un_Bathyarchaeia	Un_Bathyarchaeia	Un_Bathyarchaeia		0	0	0	0	0	0	0	0	0	0	0	0	0	0	0	0	0	0	0	0	0	0	0	0	0	0	0	0	0	0	0	0	0	0	86	0	0	0	0	0	0
A_ASV01656	Archaea	Crenarchaeota	Nitrososphaeria	Caldiarchaeales	Geothermarchaeaceae	Un_Geothermarchaeaceae	Un_Geothermarchaeaceae		0	0	0	0	0	0	0	0	0	0	0	0	0	0	0	0	0	0	0	0	0	0	0	0	0	0	0	0	0	0	0	0	0	86	0	0	0	0	0	0	0
A_ASV01650	Archaea	Euryarchaeota	Thermococci	Methanofastidiosales	Un_Methanofastidiosales	Un_Methanofastidiosales	Un_Methanofastidiosales		0	0	0	0	0	0	0	16	34	0	0	0	0	15	0	21	0	0	0	0	0	0	0	0	0	0	0	0	0	0	0	0	0	0	0	0	0	0	0	0	0
A_ASV01647	Archaea	Hydrothermarchaeota	Hydrothermarchaeia	Hydrothermarchaeales	Un_Hydrothermarchaeales	Un_Hydrothermarchaeales	Un_Hydrothermarchaeales		0	0	34	0	0	0	0	0	0	0	0	0	0	0	0	0	0	0	0	0	0	0	0	0	0	0	0	0	0	0	0	0	0	0	0	0	0	0	52	0	0
A_ASV01652	Archaea	Nanoarchaeota	Nanoarchaeia	Woesearchaeales	Un_Woesearchaeales	Un_Woesearchaeales	Un_Woesearchaeales		0	0	0	0	0	0	0	0	0	0	0	0	0	0	86	0	0	0	0	0	0	0	0	0	0	0	0	0	0	0	0	0	0	0	0	0	0	0	0	0	0
A_ASV01655	Archaea	Nanoarchaeota	Nanoarchaeia	Woesearchaeales	Un_Woesearchaeales	Un_Woesearchaeales	Un_Woesearchaeales		0	0	0	0	0	0	0	0	0	0	0	0	0	0	0	0	0	0	0	0	0	0	0	0	0	0	0	0	0	0	0	0	0	86	0	0	0	0	0	0	0
A_ASV01648	Archaea	Nanoarchaeota	Nanoarchaeia	Woesearchaeales	Un_Woesearchaeales	Un_Woesearchaeales	Un_Woesearchaeales		0	0	31	0	0	17	0	0	0	0	0	0	0	0	28	0	0	10	0	0	0	0	0	0	0	0	0	0	0	0	0	0	0	0	0	0	0	0	0	0	0
A_ASV01659	Archaea	Nanoarchaeota	Nanoarchaeia	Woesearchaeales	Un_Woesearchaeales	Un_Woesearchaeales	Un_Woesearchaeales		0	0	0	0	0	0	0	0	0	0	0	0	0	0	0	0	0	0	0	0	0	0	0	0	0	0	0	0	0	0	0	0	0	0	0	0	0	0	0	86	0
A_ASV01665	Archaea	Crenarchaeota	Bathyarchaeia	Un_Bathyarchaeia	Un_Bathyarchaeia	Un_Bathyarchaeia	Un_Bathyarchaeia		0	0	0	0	0	0	0	0	27	0	0	0	0	0	0	0	0	0	0	0	0	0	0	0	0	0	0	0	0	0	0	0	0	0	0	0	0	0	0	58	0
A_ASV01673	Archaea	Crenarchaeota	Bathyarchaeia	Un_Bathyarchaeia	Un_Bathyarchaeia	Un_Bathyarchaeia	Un_Bathyarchaeia		0	0	0	0	0	0	0	0	0	0	0	0	0	0	0	0	0	0	0	0	0	0	0	0	0	0	0	0	0	0	0	0	0	0	0	85	0	0	0	0	0
A_ASV01676	Archaea	Crenarchaeota	Bathyarchaeia	Un_Bathyarchaeia	Un_Bathyarchaeia	Un_Bathyarchaeia	Un_Bathyarchaeia		0	0	0	0	0	0	0	0	0	0	0	0	0	0	0	0	0	0	0	0	0	0	0	0	0	0	0	0	0	0	0	0	0	0	0	0	0	0	0	0	85
A_ASV01664	Archaea	Crenarchaeota	Bathyarchaeia	Un_Bathyarchaeia	Un_Bathyarchaeia	Un_Bathyarchaeia	Un_Bathyarchaeia		0	0	0	0	0	0	0	17	0	0	0	0	0	0	0	0	0	0	0	0	0	68	0	0	0	0	0	0	0	0	0	0	0	0	0	0	0	0	0	0	0
A_ASV01662	Archaea	Crenarchaeota	Nitrososphaeria	Marine Benthic Group A	Un_Marine Benthic Group A	Un_Marine Benthic Group A	Un_Marine Benthic Group A		0	0	0	0	37	32	0	0	0	0	0	16	0	0	0	0	0	0	0	0	0	0	0	0	0	0	0	0	0	0	0	0	0	0	0	0	0	0	0	0	0
A_ASV01674	Archaea	Crenarchaeota	Nitrososphaeria	Nitrosopumilales	Nitrosopumilaceae	Un_Nitrosopumilaceae	Un_Nitrosopumilaceae		0	0	0	0	0	0	0	0	0	0	0	0	0	0	0	0	0	0	0	0	0	0	0	0	0	0	0	0	0	0	0	0	0	0	0	0	29	26	30	0	0
A_ASV01672	Archaea	Un_Archaea	Un_Archaea	Un_Archaea	Un_Archaea	Un_Archaea	Un_Archaea		0	0	0	0	0	0	0	0	0	0	0	0	0	0	0	0	0	0	0	0	0	0	0	0	0	0	0	0	0	0	0	0	0	0	0	85	0	0	0	0	0
A_ASV01675	Archaea	Nanoarchaeota	Nanoarchaeia	Woesearchaeales	Un_Woesearchaeales	Un_Woesearchaeales	Un_Woesearchaeales		0	0	0	0	0	0	0	0	0	0	0	0	0	0	0	0	0	0	0	0	0	0	0	0	0	0	0	0	0	0	0	0	0	0	0	0	0	0	0	85	0
A_ASV01666	Archaea	Nanoarchaeota	Nanoarchaeia	Woesearchaeales	Un_Woesearchaeales	Un_Woesearchaeales	Un_Woesearchaeales		0	0	0	0	0	0	0	0	0	0	0	0	0	0	0	0	85	0	0	0	0	0	0	0	0	0	0	0	0	0	0	0	0	0	0	0	0	0	0	0	0
A_ASV01670	Archaea	Nanoarchaeota	Nanoarchaeia	Woesearchaeales	Un_Woesearchaeales	Un_Woesearchaeales	Un_Woesearchaeales		0	0	0	0	0	0	0	0	0	0	0	0	0	0	0	0	0	0	0	0	0	0	0	0	0	0	0	0	0	0	0	0	0	85	0	0	0	0	0	0	0
A_ASV01663	Archaea	Thermoplasmatota	Thermoplasmata	Marine Benthic Group D and DHVEG-1	Un_Marine Benthic Group D and DHVEG-1	Un_Marine Benthic Group D and DHVEG-1	Un_Marine Benthic Group D and DHVEG-1		0	0	0	0	0	0	0	56	0	0	0	0	0	0	0	16	13	0	0	0	0	0	0	0	0	0	0	0	0	0	0	0	0	0	0	0	0	0	0	0	0
A_ASV01669	Archaea	Thermoplasmatota	Thermoplasmata	Marine Benthic Group D and DHVEG-1	Un_Marine Benthic Group D and DHVEG-1	Un_Marine Benthic Group D and DHVEG-1	Un_Marine Benthic Group D and DHVEG-1		0	0	0	0	0	0	0	0	0	0	0	0	0	0	0	0	0	0	0	0	0	0	0	0	0	0	0	0	0	0	0	0	0	85	0	0	0	0	0	0	0
A_ASV01671	Archaea	Thermoplasmatota	Thermoplasmata	Un_Thermoplasmata	Un_Thermoplasmata	Un_Thermoplasmata	Un_Thermoplasmata		0	0	0	0	0	0	0	0	0	0	0	0	0	0	0	0	0	0	0	0	0	0	0	0	0	0	0	0	0	0	0	0	0	45	0	0	0	0	40	0	0
A_ASV01686	Archaea	Crenarchaeota	Bathyarchaeia	Un_Bathyarchaeia	Un_Bathyarchaeia	Un_Bathyarchaeia	Un_Bathyarchaeia		0	0	0	0	0	0	0	0	0	0	0	0	0	0	0	0	0	0	0	0	0	0	0	0	0	0	0	0	0	0	0	0	0	0	84	0	0	0	0	0	0
A_ASV01688	Archaea	Crenarchaeota	Bathyarchaeia	Un_Bathyarchaeia	Un_Bathyarchaeia	Un_Bathyarchaeia	Un_Bathyarchaeia		0	0	0	0	0	0	0	0	0	0	0	0	0	0	0	0	0	0	0	0	0	0	0	0	0	0	0	0	0	0	0	0	0	0	0	84	0	0	0	0	0
A_ASV01689	Archaea	Crenarchaeota	Nitrososphaeria	Nitrosopumilales	Nitrosopumilaceae	Candidatus Nitrosopumilus	Un_Candidatus Nitrosopumilus		0	0	0	0	0	0	0	0	0	0	0	0	0	0	0	0	0	0	0	0	0	0	0	0	0	0	0	0	0	0	0	0	0	0	0	0	0	0	0	84	0
A_ASV01680	Archaea	Un_Archaea	Un_Archaea	Un_Archaea	Un_Archaea	Un_Archaea	Un_Archaea		0	0	0	0	0	14	0	70	0	0	0	0	0	0	0	0	0	0	0	0	0	0	0	0	0	0	0	0	0	0	0	0	0	0	0	0	0	0	0	0	0
A_ASV01679	Archaea	Thermoplasmatota	Thermoplasmata	Un_Thermoplasmata	Un_Thermoplasmata	Un_Thermoplasmata	Un_Thermoplasmata		0	0	0	0	0	23	0	0	0	0	0	0	0	61	0	0	0	0	0	0	0	0	0	0	0	0	0	0	0	0	0	0	0	0	0	0	0	0	0	0	0
A_ASV01698	Archaea	Crenarchaeota	Bathyarchaeia	Un_Bathyarchaeia	Un_Bathyarchaeia	Un_Bathyarchaeia	Un_Bathyarchaeia		0	0	0	0	0	0	0	0	0	0	0	0	0	0	0	0	0	0	0	0	0	0	0	83	0	0	0	0	0	0	0	0	0	0	0	0	0	0	0	0	0
A_ASV01700	Archaea	Crenarchaeota	Bathyarchaeia	Un_Bathyarchaeia	Un_Bathyarchaeia	Un_Bathyarchaeia	Un_Bathyarchaeia		0	0	0	0	0	0	0	0	0	0	0	0	0	0	0	0	0	0	0	0	0	0	0	0	0	0	0	0	0	0	0	0	0	83	0	0	0	0	0	0	0
A_ASV01701	Archaea	Crenarchaeota	Bathyarchaeia	Un_Bathyarchaeia	Un_Bathyarchaeia	Un_Bathyarchaeia	Un_Bathyarchaeia		0	0	0	0	0	0	0	0	0	0	0	0	0	0	0	0	0	0	0	0	0	0	0	0	0	0	0	0	0	0	0	0	0	0	83	0	0	0	0	0	0
A_ASV01693	Archaea	Crenarchaeota	Nitrososphaeria	Nitrosopumilales	Nitrosopumilaceae	Cenarchaeum	Un_Cenarchaeum		0	0	0	0	0	0	0	83	0	0	0	0	0	0	0	0	0	0	0	0	0	0	0	0	0	0	0	0	0	0	0	0	0	0	0	0	0	0	0	0	0
A_ASV01702	Archaea	Crenarchaeota	Nitrososphaeria	Nitrosopumilales	Nitrosopumilaceae	Un_Nitrosopumilaceae	Un_Nitrosopumilaceae		0	0	0	0	0	0	0	0	0	0	0	0	0	0	0	0	0	0	0	0	0	0	0	0	0	0	0	0	0	0	0	0	0	0	0	0	46	37	0	0	0
A_ASV01703	Archaea	Crenarchaeota	Nitrososphaeria	Nitrosopumilales	Nitrosopumilaceae	Un_Nitrosopumilaceae	Un_Nitrosopumilaceae		0	0	0	0	0	0	0	0	0	0	0	0	0	0	0	0	0	0	0	0	0	0	0	0	0	0	0	0	0	0	0	0	0	0	0	0	0	0	83	0	0
A_ASV01696	Archaea	Un_Archaea	Un_Archaea	Un_Archaea	Un_Archaea	Un_Archaea	Un_Archaea		0	0	0	0	0	0	0	0	0	0	0	0	44	0	0	0	0	0	0	0	0	0	0	0	0	0	0	0	0	0	0	39	0	0	0	0	0	0	0	0	0
A_ASV01695	Archaea	Nanoarchaeota	Nanoarchaeia	Woesearchaeales	Un_Woesearchaeales	Un_Woesearchaeales	Un_Woesearchaeales		0	0	0	0	0	0	0	0	0	0	0	23	0	60	0	0	0	0	0	0	0	0	0	0	0	0	0	0	0	0	0	0	0	0	0	0	0	0	0	0	0
A_ASV01694	Archaea	Nanoarchaeota	Nanoarchaeia	Woesearchaeales	Un_Woesearchaeales	Un_Woesearchaeales	Un_Woesearchaeales		0	0	0	0	0	0	0	48	0	0	0	0	0	0	0	0	0	0	0	0	0	0	0	0	0	0	0	0	0	0	0	0	0	0	0	0	0	0	0	35	0
A_ASV01699	Archaea	Nanoarchaeota	Nanoarchaeia	Woesearchaeales	SCGC AAA286-E23	Un_SCGC AAA286-E23	Un_SCGC AAA286-E23		0	0	0	0	0	0	0	0	0	0	0	0	0	0	0	0	0	0	0	0	0	0	0	0	0	0	0	24	0	0	0	0	0	0	0	0	41	0	18	0	0
A_ASV01712	Archaea	Altiarchaeota	Altiarchaeia	Altiarchaeales	Altiarchaeaceae	Candidatus Altiarchaeum	Un_Candidatus Altiarchaeum		0	0	0	0	0	0	0	0	0	0	0	0	24	0	0	0	0	0	0	0	0	0	0	0	0	0	0	0	18	26	0	14	0	0	0	0	0	0	0	0	0
A_ASV01710	Archaea	Asgardarchaeota	Un_Asgardarchaeota	Un_Asgardarchaeota	Un_Asgardarchaeota	Un_Asgardarchaeota	Un_Asgardarchaeota		0	0	0	0	0	0	0	0	34	0	0	0	0	0	0	0	0	0	0	0	0	0	0	0	0	0	0	0	0	0	0	0	0	0	0	0	0	0	0	0	0
A_ASV01708	Archaea	Crenarchaeota	Bathyarchaeia	Un_Bathyarchaeia	Un_Bathyarchaeia	Un_Bathyarchaeia	Un_Bathyarchaeia		0	0	0	0	0	0	0	0	82	0	0	0	0	0	0	0	0	0	0	0	0	0	0	0	0	0	0	0	0	0	0	0	0	0	0	0	0	0	0	0	0
A_ASV01714	Archaea	Crenarchaeota	Bathyarchaeia	Un_Bathyarchaeia	Un_Bathyarchaeia	Un_Bathyarchaeia	Un_Bathyarchaeia		0	0	0	0	0	0	0	0	0	0	0	0	0	0	0	0	0	0	82	0	0	0	0	0	0	0	0	0	0	0	0	0	0	0	0	0	0	0	0	0	0
A_ASV01706	Archaea	Nanoarchaeota	Nanoarchaeia	Woesearchaeales	Un_Woesearchaeales	Un_Woesearchaeales	Un_Woesearchaeales		0	0	0	82	0	0	0	0	0	0	0	0	0	0	0	0	0	0	0	0	0	0	0	0	0	0	0	0	0	0	0	0	0	0	0	0	0	0	0	0	0
A_ASV01718	Archaea	Thermoplasmatota	Thermoplasmata	Marine Benthic Group D and DHVEG-1	Un_Marine Benthic Group D and DHVEG-1	Un_Marine Benthic Group D and DHVEG-1	Un_Marine Benthic Group D and DHVEG-1		0	0	0	0	0	0	0	0	0	0	0	0	0	0	0	0	0	0	0	0	0	0	0	0	0	0	0	0	0	0	0	0	0	82	0	0	0	0	0	0	0
A_ASV01720	Archaea	Thermoplasmatota	Thermoplasmata	Marine Benthic Group D and DHVEG-1	Un_Marine Benthic Group D and DHVEG-1	Un_Marine Benthic Group D and DHVEG-1	Un_Marine Benthic Group D and DHVEG-1		0	0	0	0	0	0	0	0	0	0	0	0	0	0	0	0	0	0	0	0	0	0	0	0	0	0	0	0	0	0	0	0	0	0	0	0	0	0	0	0	0
A_ASV01713	Archaea	Thermoplasmatota	Thermoplasmata	SG8-5	Un_SG8-5	Un_SG8-5	Un_SG8-5		0	0	0	0	0	0	0	0	0	0	0	0	0	21	0	0	0	0	0	0	0	0	0	0	0	0	0	0	0	0	54	0	0	0	0	0	0	7	0	0	0
A_ASV01733	Archaea	Crenarchaeota	Bathyarchaeia	Un_Bathyarchaeia	Un_Bathyarchaeia	Un_Bathyarchaeia	Un_Bathyarchaeia		0	0	0	0	0	0	0	0	0	0	0	0	0	0	0	0	0	0	0	0	0	0	0	0	0	0	0	0	0	0	0	0	0	0	0	81	0	0	0	0	0
A_ASV01722	Archaea	Hydrothermarchaeota	Hydrothermarchaeia	Hydrothermarchaeales	Un_Hydrothermarchaeales	Un_Hydrothermarchaeales	Un_Hydrothermarchaeales		0	0	0	0	0	0	0	81	0	0	0	0	0	0	0	0	0	0	0	0	0	0	0	0	0	0	0	0	0	0	0	0	0	0	0	0	0	0	0	0	0
A_ASV01727	Archaea	Un_Archaea	Un_Archaea	Un_Archaea	Un_Archaea	Un_Archaea	Un_Archaea		0	0	0	0	0	0	0	0	0	0	0	0	0	39	0	0	0	0	42	0	0	0	0	0	0	0	0	0	0	0	0	0	0	0	0	0	0	0	0	0	0
A_ASV01731	Archaea	Un_Archaea	Un_Archaea	Un_Archaea	Un_Archaea	Un_Archaea	Un_Archaea		0	0	0	0	0	0	0	0	0	0	0	0	0	0	0	0	0	0	0	0	0	0	0	0	0	0	0	0	0	0	81	0	0	0	0	0	0	0	0	0	0
A_ASV01724	Archaea	Nanoarchaeota	Nanoarchaeia	Woesearchaeales	Un_Woesearchaeales	Un_Woesearchaeales	Un_Woesearchaeales		0	0	0	0	0	0	0	0	0	0	0	52	0	0	0	29	0	0	0	0	0	0	0	0	0	0	0	0	0	0	0	0	0	0	0	0	0	0	0	0	0
A_ASV01735	Archaea	Thermoplasmatota	Thermoplasmata	Un_Thermoplasmata	Un_Thermoplasmata	Un_Thermoplasmata	Un_Thermoplasmata		0	0	0	0	0	0	0	0	0	0	0	0	0	0	0	0	0	0	0	0	0	0	0	0	0	0	0	0	0	0	0	0	0	0	0	0	0	0	0	43	0
A_ASV01747	Archaea	Asgardarchaeota	Lokiarchaeia	Lokiarchaeia	Lokiarchaeia	Lokiarchaeia	Lokiarchaeia		0	0	0	0	0	0	0	0	0	0	0	0	0	0	0	0	0	0	0	0	0	0	0	0	0	0	0	0	0	0	0	0	0	0	80	0	0	0	0	0	0
A_ASV01752	Archaea	Asgardarchaeota	Lokiarchaeia	Lokiarchaeia	Lokiarchaeia	Lokiarchaeia	Lokiarchaeia		0	0	0	0	0	0	0	0	0	0	0	0	0	0	0	0	0	0	0	0	0	0	0	0	0	0	0	0	0	0	0	0	0	0	0	0	0	0	0	0	0
A_ASV01739	Archaea	Asgardarchaeota	Odinarchaeia	Un_Odinarchaeia	Un_Odinarchaeia	Un_Odinarchaeia	Un_Odinarchaeia		0	0	0	0	0	0	0	80	0	0	0	0	0	0	0	0	0	0	0	0	0	0	0	0	0	0	0	0	0	0	0	0	0	0	0	0	0	0	0	0	0
A_ASV01744	Archaea	Crenarchaeota	Bathyarchaeia	Un_Bathyarchaeia	Un_Bathyarchaeia	Un_Bathyarchaeia	Un_Bathyarchaeia		0	0	0	0	0	0	0	0	0	0	0	0	0	0	0	0	0	0	0	0	0	0	0	80	0	0	0	0	0	0	0	0	0	0	0	0	0	0	0	0	0
A_ASV01745	Archaea	Crenarchaeota	Bathyarchaeia	Un_Bathyarchaeia	Un_Bathyarchaeia	Un_Bathyarchaeia	Un_Bathyarchaeia		0	0	0	0	0	0	0	0	0	0	0	0	0	0	0	0	0	0	0	0	0	0	0	0	0	0	0	0	0	0	0	0	0	80	0	0	0	0	0	0	0
A_ASV01748	Archaea	Crenarchaeota	Bathyarchaeia	Un_Bathyarchaeia	Un_Bathyarchaeia	Un_Bathyarchaeia	Un_Bathyarchaeia		0	0	0	0	0	0	0	0	0	0	0	0	0	0	0	0	0	0	0	0	0	0	0	0	0	0	0	0	0	0	0	0	0	0	0	80	0	0	0	0	0
A_ASV01746	Archaea	Crenarchaeota	Bathyarchaeia	Un_Bathyarchaeia	Un_Bathyarchaeia	Un_Bathyarchaeia	Un_Bathyarchaeia		0	0	0	0	0	0	0	0	0	0	0	0	0	0	0	0	0	0	0	0	0	0	0	0	0	0	0	0	0	0	0	0	0	80	0	0	0	0	0	0	0
A_ASV01740	Archaea	Halobacterota	Methanocellia	Methanocellales	Un_Methanocellales	Un_Methanocellales	Un_Methanocellales		0	0	0	0	0	0	0	36	31	0	0	0	0	0	0	0	0	13	0	0	0	0	0	0	0	0	0	0	0	0	0	0	0	0	0	0	0	0	0	0	0
A_ASV01742	Archaea	Nanoarchaeota	Nanoarchaeia	Woesearchaeales	Un_Woesearchaeales	Un_Woesearchaeales	Un_Woesearchaeales		0	0	0	0	0	0	0	0	0	0	0	0	0	0	0	0	0	0	80	0	0	0	0	0	0	0	0	0	0	0	0	0	0	0	0	0	0	0	0	0	0
A_ASV01743	Archaea	Thermoplasmatota	Thermoplasmata	Marine Benthic Group D and DHVEG-1	Un_Marine Benthic Group D and DHVEG-1	Un_Marine Benthic Group D and DHVEG-1	Un_Marine Benthic Group D and DHVEG-1		0	0	0	0	0	0	0	0	0	0	0	0	0	0	0	0	0	0	80	0	0	0	0	0	0	0	0	0	0	0	0	0	0	0	0	0	0	0	0	0	0
A_ASV01762	Archaea	Crenarchaeota	Bathyarchaeia	Un_Bathyarchaeia	Un_Bathyarchaeia	Un_Bathyarchaeia	Un_Bathyarchaeia		0	0	0	0	0	0	0	0	0	0	0	0	0	0	0	0	0	0	0	0	0	0	0	79	0	0	0	0	0	0	0	0	0	0	0	0	0	0	0	0	0
A_ASV01764	Archaea	Crenarchaeota	Bathyarchaeia	Un_Bathyarchaeia	Un_Bathyarchaeia	Un_Bathyarchaeia	Un_Bathyarchaeia		0	0	0	0	0	0	0	0	0	0	0	0	0	0	0	0	0	0	0	0	0	0	0	0	0	0	0	0	0	0	0	0	0	79	0	0	0	0	0	0	0
A_ASV01758	Archaea	Halobacterota	Methanosarcinia	Methanosarciniales	Methanosarcinaceae	Methanohalophilus	Un_Methanohalophilus		0	0	0	0	0	0	0	0	79	0	0	0	0	0	0	0	0	0	0	0	0	0	0	0	0	0	0	0	0	0	0	0	0	0	0	0	0	0	0	0	0
A_ASV01760	Archaea	Nanoarchaeota	Nanoarchaeia	Woesearchaeales	Un_Woesearchaeales	Un_Woesearchaeales	Un_Woesearchaeales		0	0	0	0	0	0	0	0	0	0	0	0	0	0	0	0	0	0	79	0	0	0	0	0	0	0	0	0	0	0	0	0	0	0	0	0	0	0	0	0	0
A_ASV01761	Archaea	Nanoarchaeota	Nanoarchaeia	Woesearchaeales	Un_Woesearchaeales	Un_Woesearchaeales	Un_Woesearchaeales		0	0	0	0	0	0	0	0	0	0	0	0	0	0	0	0	0	0	79	0	0	0	0	0	0	0	0	0	0	0	0	0	0	0	0	0	0	0	0	0	0
A_ASV01757	Archaea	Thermoplasmatota	Thermoplasmata	Marine Benthic Group D and DHVEG-1	Un_Marine Benthic Group D and DHVEG-1	Un_Marine Benthic Group D and DHVEG-1	Un_Marine Benthic Group D and DHVEG-1		0	0	0	0	0	0	35	44	0	0	0	0	0	0	0	0	0	0	0	0	0	0	0	0	0	0	0	0	0	0	0	0	0	0	0	0	0	0	0	0	0
A_ASV01755	Archaea	Thermoplasmatota	Thermoplasmata	Un_Thermoplasmata	Un_Thermoplasmata	Un_Thermoplasmata	Un_Thermoplasmata		0	0	0	0	26	0	0	0	0	0	0	0	0	0	25	0	28	0	0	0	0	0	0	0	0	0	0	0	0	0	0	0	0	0	0	0	0	0	0	0	0
A_ASV01782	Archaea	Asgardarchaeota	Lokiarchaeia	Lokiarchaeia	Lokiarchaeia	Lokiarchaeia	Lokiarchaeia		0	0	0	0	0	0	0	0	0	0	0	0	0	0	0	0	0	0	0	0	0	0	0	0	0	0	0	0	0	0	0	0	0	0	0	78	0	0	0	0	0
A_ASV01771	Archaea	Crenarchaeota	Bathyarchaeia	Un_Bathyarchaeia	Un_Bathyarchaeia	Un_Bathyarchaeia	Un_Bathyarchaeia		0	0	0	0	0	0	78	0	0	0	0	0	0	0	0	0	0	0	0	0	0	0	0	0	0	0	0	0	0	0	0	0	0	0	0	0	0	0	0	0	0
A_ASV01776	Archaea	Crenarchaeota	Bathyarchaeia	Un_Bathyarchaeia	Un_Bathyarchaeia	Un_Bathyarchaeia	Un_Bathyarchaeia		0	0	0	0	0	0	0	0	0	0	0	0	0	0	0	0	0	0	78	0	0	0	0	0	0	0	0	0	0	0	0	0	0	0	0	0	0	0	0	0	0
A_ASV01777	Archaea	Crenarchaeota	Bathyarchaeia	Un_Bathyarchaeia	Un_Bathyarchaeia	Un_Bathyarchaeia	Un_Bathyarchaeia		0	0	0	0	0	0	0	0	0	0	0	0	0	0	0	0	0	0	0	0	0	0	0	78	0	0	0	0	0	0	0	0	0	0	0	0	0	0	0	0	0
A_ASV01778	Archaea	Crenarchaeota	Bathyarchaeia	Un_Bathyarchaeia	Un_Bathyarchaeia	Un_Bathyarchaeia	Un_Bathyarchaeia		0	0	0	0	0	0	0	0	0	0	0	0	0	0	0	0	0	0	0	0	0	0	0	0	78	0	0	0	0	0	0	0	0	0	0	0	0	0	0	0	0
A_ASV01781	Archaea	Halobacterota	Methanomicrobia	Methanomicrobiales	Methanomicrobiaceae	Methanogenium	Un_Methanogenium		0	0	0	0	0	0	0	0	0	0	0	0	0	0	0	0	0	0	0	0	0	0	0	0	0	0	0	0	0	0	78	0	0	0	0	0	0	0	0	0	0
A_ASV01767	Archaea	Hydrothermarchaeota	Hydrothermarchaeia	Hydrothermarchaeales	Un_Hydrothermarchaeales	Un_Hydrothermarchaeales	Un_Hydrothermarchaeales		0	26	27	0	0	0	0	0	25	0	0	0	0	0	0	0	0	0	0	0	0	0	0	0	0	0	0	0	0	0	0	0	0	0	0	0	0	0	0	0	0
A_ASV01768	Archaea	Nanoarchaeota	Nanoarchaeia	Woesearchaeales	Un_Woesearchaeales	Un_Woesearchaeales	Un_Woesearchaeales		0	0	41	0	0	0	0	0	0	0	0	0	0	0	0	0	0	0	0	0	0	0	0	0	0	0	0	0	0	0	0	0	0	0	0	0	0	0	37	0	0
A_ASV01773	Archaea	Nanoarchaeota	Nanoarchaeia	Woesearchaeales	Un_Woesearchaeales	Un_Woesearchaeales	Un_Woesearchaeales		0	0	0	0	0	0	0	18	0	0	0	0	60	0	0	0	0	0	0	0	0	0	0	0	0	0	0	0	0	0	0	0	0	0	0	0	0	0	0	0	0
A_ASV01775	Archaea	Nanoarchaeota	Nanoarchaeia	Woesearchaeales	Un_Woesearchaeales	Un_Woesearchaeales	Un_Woesearchaeales		0	0	0	0	0	0	0	0	0	0	0	0	14	64	0	0	0	0	0	0	0	0	0	0	0	0	0	0	0	0	0	0	0	0	0	0	0	0	0	0	0
A_ASV01779	Archaea	Nanoarchaeota	Nanoarchaeia	Woesearchaeales	Un_Woesearchaeales	Un_Woesearchaeales	Un_Woesearchaeales		0	0	0	0	0	0	0	0	0	0	0	0	0	0	0	0	0	0	0	0	0	0	0	0	0	0	0	37	41	0	0	0	0	0	0	0	0	0	0	0	0
A_ASV01772	Archaea	Thermoplasmatota	Thermoplasmata	Marine Benthic Group D and DHVEG-1	Un_Marine Benthic Group D and DHVEG-1	Un_Marine Benthic Group D and DHVEG-1	Un_Marine Benthic Group D and DHVEG-1		0	0	0	0	0	0	0	78	0	0	0	0	0	0	0	0	0	0	0	0	0	0	0	0	0	0	0	0	0	0	0	0	0	0	0	0	0	0	0	0	0
A_ASV01788	Archaea	Crenarchaeota	Bathyarchaeia	Un_Bathyarchaeia	Un_Bathyarchaeia	Un_Bathyarchaeia	Un_Bathyarchaeia		0	0	0	0	0	0	0	0	42	0	0	0	0	0	0	0	0	0	0	0	0	0	0	0	0	0	0	0	0	0	0	0	0	0	0	0	0	0	0	0	0
A_ASV01801	Archaea	Crenarchaeota	Bathyarchaeia	Un_Bathyarchaeia	Un_Bathyarchaeia	Un_Bathyarchaeia	Un_Bathyarchaeia		0	0	0	0	0	0	0	0	0	0	0	0	0	0	0	0	0	0	0	0	0	0	0	0	0	0	77	0	0	0	0	0	0	0	0	0	0	0	0	0	0
A_ASV01803	Archaea	Crenarchaeota	Bathyarchaeia	Un_Bathyarchaeia	Un_Bathyarchaeia	Un_Bathyarchaeia	Un_Bathyarchaeia		0	0	0	0	0	0	0	0	0	0	0	0	0	0	0	0	0	0	0	0	0	0	0	0	0	0	0	0	0	0	0	0	0	77	0	0	0	0	0	0	0
A_ASV01804	Archaea	Crenarchaeota	Bathyarchaeia	Un_Bathyarchaeia	Un_Bathyarchaeia	Un_Bathyarchaeia	Un_Bathyarchaeia		0	0	0	0	0	0	0	0	0	0	0	0	0	0	0	0	0	0	0	0	0	0	0	0	0	0	0	0	0	0	0	0	0	77	0	0	0	0	0	0	0
A_ASV01808	Archaea	Crenarchaeota	Bathyarchaeia	Un_Bathyarchaeia	Un_Bathyarchaeia	Un_Bathyarchaeia	Un_Bathyarchaeia		0	0	0	0	0	0	0	0	0	0	0	0	0	0	0	0	0	0	0	0	0	0	0	0	0	0	0	0	0	0	0	0	0	0	0	0	0	0	0	77	0
A_ASV01807	Archaea	Crenarchaeota	Nitrososphaeria	Marine Benthic Group A	Un_Marine Benthic Group A	Un_Marine Benthic Group A	Un_Marine Benthic Group A		0	0	0	0	0	0	0	0	0	0	0	0	0	0	0	0	0	0	0	0	0	0	0	0	0	0	0	0	0	0	0	0	0	0	0	0	0	0	0	77	0
A_ASV01794	Archaea	Hydrothermarchaeota	Hydrothermarchaeia	Hydrothermarchaeales	Un_Hydrothermarchaeales	Un_Hydrothermarchaeales	Un_Hydrothermarchaeales		0	0	0	0	0	0	0	0	0	0	0	0	0	27	0	0	0	0	0	0	0	0	0	0	0	0	0	0	0	34	0	0	16	0	0	0	0	0	0	0	0
A_ASV01789	Archaea	Un_Archaea	Un_Archaea	Un_Archaea	Un_Archaea	Un_Archaea	Un_Archaea		0	0	0	0	0	0	0	0	39	0	0	0	0	0	0	0	0	0	0	0	0	0	0	0	0	0	0	0	0	0	0	0	0	0	38	0	0	0	0	0	0
A_ASV01791	Archaea	Nanoarchaeota	Nanoarchaeia	Woesearchaeales	Un_Woesearchaeales	Un_Woesearchaeales	Un_Woesearchaeales		0	0	0	0	0	0	0	0	0	0	19	0	16	0	0	0	28	0	0	0	0	0	0	0	0	0	0	0	0	14	0	0	0	0	0	0	0	0	0	0	0
A_ASV01795	Archaea	Nanoarchaeota	Nanoarchaeia	Woesearchaeales	Un_Woesearchaeales	Un_Woesearchaeales	Un_Woesearchaeales		0	0	0	0	0	0	0	0	0	0	0	0	0	0	0	0	0	18	0	0	0	0	0	0	0	0	0	0	0	0	0	34	25	0	0	0	0	0	0	0	0
A_ASV01796	Archaea	Nanoarchaeota	Nanoarchaeia	Woesearchaeales	Un_Woesearchaeales	Un_Woesearchaeales	Un_Woesearchaeales		0	0	0	0	0	0	0	0	0	0	0	0	0	0	0	0	0	0	77	0	0	0	0	0	0	0	0	0	0	0	0	0	0	0	0	0	0	0	0	0	0
A_ASV01805	Archaea	Nanoarchaeota	Nanoarchaeia	Woesearchaeales	Un_Woesearchaeales	Un_Woesearchaeales	Un_Woesearchaeales		0	0	0	0	0	0	0	0	0	0	0	0	0	0	0	0	0	0	0	0	0	0	0	0	0	0	0	0	0	0	0	0	0	0	0	0	0	47	30	0	0
A_ASV01792	Archaea	Thermoplasmatota	Thermoplasmata	Marine Benthic Group D and DHVEG-1	Un_Marine Benthic Group D and DHVEG-1	Un_Marine Benthic Group D and DHVEG-1	Un_Marine Benthic Group D and DHVEG-1		0	0	0	0	0	0	0	0	0	0	0	0	33	22	22	0	0	0	0	0	0	0	0	0	0	0	0	0	0	0	0	0	0	0	0	0	0	0	0	0	0
A_ASV01821	Archaea	Asgardarchaeota	Odinarchaeia	Un_Odinarchaeia	Un_Odinarchaeia	Un_Odinarchaeia	Un_Odinarchaeia		0	0	0	0	0	0	0	0	0	0	0	0	0	0	0	0	0	0	0	0	0	0	0	0	0	0	0	0	0	0	0	0	0	76	0	0	0	0	0	0	0
A_ASV01819	Archaea	Crenarchaeota	Bathyarchaeia	Un_Bathyarchaeia	Un_Bathyarchaeia	Un_Bathyarchaeia	Un_Bathyarchaeia		0	0	0	0	0	0	0	0	0	0	0	0	0	0	0	0	0	0	0	0	0	0	0	0	0	0	76	0	0	0	0	0	0	0	0	0	0	0	0	0	0
A_ASV01829	Archaea	Crenarchaeota	Bathyarchaeia	Un_Bathyarchaeia	Un_Bathyarchaeia	Un_Bathyarchaeia	Un_Bathyarchaeia		0	0	0	0	0	0	0	0	0	0	0	0	0	0	0	0	0	0	0	0	0	0	0	0	0	0	0	0	0	0	0	0	0	0	0	0	0	0	0	0	0
A_ASV01810	Archaea	Crenarchaeota	Nitrososphaeria	Nitrosopumilales	Nitrosopumilaceae	Un_Nitrosopumilaceae	Un_Nitrosopumilaceae		0	0	0	0	0	0	0	0	0	0	0	0	76	0	0	0	0	0	0	0	0	0	0	0	0	0	0	0	0	0	0	0	0	0	0	0	0	0	0	0	0
A_ASV01825	Archaea	Crenarchaeota	Nitrososphaeria	Nitrosopumilales	Nitrosopumilaceae	Un_Nitrosopumilaceae	Un_Nitrosopumilaceae		0	0	0	0	0	0	0	0	0	0	0	0	0	0	0	0	0	0	0	0	0	0	0	0	0	0	0	0	0	0	0	0	0	0	0	0	0	0	0	76	0
A_ASV01828	Archaea	Hadarchaeota	Hadarchaeia	Hadarchaeales	Un_Hadarchaeales	Un_Hadarchaeales	Un_Hadarchaeales		0	0	0	0	0	0	0	0	0	0	0	0	0	0	0	0	0	0	0	0	0	0	0	0	0	0	0	0	0	0	0	0	0	0	0	0	0	0	0	76	0
A_ASV01827	Archaea	Halobacterota	Methanosarcinia	Methanosarciniales	Methanosarcinaceae	Un_Methanosarcinaceae	Un_Methanosarcinaceae		0	0	0	0	0	0	0	0	0	0	0	0	0	0	0	0	0	0	0	0	0	0	0	0	0	0	0	0	0	0	0	0	0	0	0	0	0	0	0	76	0
A_ASV01823	Archaea	Un_Archaea	Un_Archaea	Un_Archaea	Un_Archaea	Un_Archaea	Un_Archaea		0	0	0	0	0	0	0	0	0	0	0	0	0	0	0	0	0	0	0	0	0	0	0	0	0	0	0	0	0	0	0	0	0	0	0	76	0	0	0	0	0
A_ASV01812	Archaea	Nanoarchaeota	Nanoarchaeia	Woesearchaeales	Un_Woesearchaeales	Un_Woesearchaeales	Un_Woesearchaeales		0	0	0	0	0	0	0	0	0	0	0	0	0	67	0	0	0	0	0	0	0	0	0	0	0	0	0	9	0	0	0	0	0	0	0	0	0	0	0	0	0
A_ASV01814	Archaea	Nanoarchaeota	Nanoarchaeia	Woesearchaeales	Un_Woesearchaeales	Un_Woesearchaeales	Un_Woesearchaeales		0	0	0	0	0	0	0	0	0	0	0	0	0	0	0	0	0	0	76	0	0	0	0	0	0	0	0	0	0	0	0	0	0	0	0	0	0	0	0	0	0
A_ASV01815	Archaea	Nanoarchaeota	Nanoarchaeia	Woesearchaeales	Un_Woesearchaeales	Un_Woesearchaeales	Un_Woesearchaeales		0	0	0	0	0	0	0	0	0	0	0	0	0	0	0	0	0	0	76	0	0	0	0	0	0	0	0	0	0	0	0	0	0	0	0	0	0	0	0	0	0
A_ASV01813	Archaea	Thermoplasmatota	Thermoplasmata	Un_Thermoplasmata	Un_Thermoplasmata	Un_Thermoplasmata	Un_Thermoplasmata		0	0	0	0	0	0	0	0	0	0	0	0	0	0	0	0	76	0	0	0	0	0	0	0	0	0	0	0	0	0	0	0	0	0	0	0	0	0	0	0	0
A_ASV01842	Archaea	Asgardarchaeota	Lokiarchaeia	Lokiarchaeia	Lokiarchaeia	Lokiarchaeia	Lokiarchaeia		0	0	0	0	0	0	0	0	0	0	0	0	0	0	0	0	0	0	0	0	0	0	0	0	0	0	0	0	0	0	0	0	0	0	0	75	0	0	0	0	0
A_ASV01845	Archaea	Crenarchaeota	Bathyarchaeia	Un_Bathyarchaeia	Un_Bathyarchaeia	Un_Bathyarchaeia	Un_Bathyarchaeia		0	0	0	0	0	0	0	0	0	0	0	0	0	0	0	0	0	0	0	0	0	0	0	0	0	0	0	0	0	0	0	0	0	0	0	0	0	0	0	75	0
A_ASV01846	Archaea	Crenarchaeota	Bathyarchaeia	Un_Bathyarchaeia	Un_Bathyarchaeia	Un_Bathyarchaeia	Un_Bathyarchaeia		0	0	0	0	0	0	0	0	0	0	0	0	0	0	0	0	0	0	0	0	0	0	0	0	0	0	0	0	0	0	0	0	0	0	0	0	0	0	0	0	33
A_ASV01847	Archaea	Crenarchaeota	Bathyarchaeia	Un_Bathyarchaeia	Un_Bathyarchaeia	Un_Bathyarchaeia	Un_Bathyarchaeia		0	0	0	0	0	0	0	0	0	0	0	0	0	0	0	0	0	0	0	0	0	0	0	0	0	0	0	0	0	0	0	0	0	0	0	0	0	0	0	0	0
A_ASV01843	Archaea	Crenarchaeota	Bathyarchaeia	Un_Bathyarchaeia	Un_Bathyarchaeia	Un_Bathyarchaeia	Un_Bathyarchaeia		0	0	0	0	0	0	0	0	0	0	0	0	0	0	0	0	0	0	0	0	0	0	0	0	0	0	0	0	0	0	0	0	0	0	0	75	0	0	0	0	0
A_ASV01833	Archaea	Un_Archaea	Un_Archaea	Un_Archaea	Un_Archaea	Un_Archaea	Un_Archaea		0	0	0	0	0	0	75	0	0	0	0	0	0	0	0	0	0	0	0	0	0	0	0	0	0	0	0	0	0	0	0	0	0	0	0	0	0	0	0	0	0
A_ASV01834	Archaea	Nanoarchaeota	Nanoarchaeia	Woesearchaeales	Un_Woesearchaeales	Un_Woesearchaeales	Un_Woesearchaeales		0	0	0	0	0	0	0	75	0	0	0	0	0	0	0	0	0	0	0	0	0	0	0	0	0	0	0	0	0	0	0	0	0	0	0	0	0	0	0	0	0
A_ASV01858	Archaea	Crenarchaeota	Bathyarchaeia	Un_Bathyarchaeia	Un_Bathyarchaeia	Un_Bathyarchaeia	Un_Bathyarchaeia		0	0	0	0	0	0	0	0	0	0	0	0	0	0	0	0	0	0	0	0	0	0	0	0	0	0	0	0	0	0	0	0	0	74	0	0	0	0	0	0	0
A_ASV01860	Archaea	Crenarchaeota	Bathyarchaeia	Un_Bathyarchaeia	Un_Bathyarchaeia	Un_Bathyarchaeia	Un_Bathyarchaeia		0	0	0	0	0	0	0	0	0	0	0	0	0	0	0	0	0	0	0	0	0	0	0	0	0	0	0	0	0	0	0	0	0	0	0	0	0	0	0	74	0
A_ASV01861	Archaea	Crenarchaeota	Bathyarchaeia	Un_Bathyarchaeia	Un_Bathyarchaeia	Un_Bathyarchaeia	Un_Bathyarchaeia		0	0	0	0	0	0	0	0	0	0	0	0	0	0	0	0	0	0	0	0	0	0	0	0	0	0	0	0	0	0	0	0	0	0	0	0	0	0	0	0	0
A_ASV01854	Archaea	Micrarchaeota	Micrarchaeia	Micrarchaeales	Un_Micrarchaeales	Un_Micrarchaeales	Un_Micrarchaeales		0	0	0	0	0	0	0	0	0	0	0	0	0	0	29	23	0	0	0	0	0	0	0	0	0	0	0	0	0	0	22	0	0	0	0	0	0	0	0	0	0
A_ASV01857	Archaea	Un_Archaea	Un_Archaea	Un_Archaea	Un_Archaea	Un_Archaea	Un_Archaea		0	0	0	0	0	0	0	0	0	0	0	0	0	0	0	0	0	0	0	0	0	0	0	0	0	0	0	0	0	0	0	0	0	74	0	0	0	0	0	0	0
A_ASV01852	Archaea	Nanoarchaeota	Nanoarchaeia	Woesearchaeales	GW2011_GWC1_47_15	Un_GW2011_GWC1_47_15	Un_GW2011_GWC1_47_15		0	0	0	0	0	0	0	0	0	0	13	0	27	0	0	5	0	0	29	0	0	0	0	0	0	0	0	0	0	0	0	0	0	0	0	0	0	0	0	0	0
A_ASV01850	Archaea	Nanoarchaeota	Nanoarchaeia	Woesearchaeales	Un_Woesearchaeales	Un_Woesearchaeales	Un_Woesearchaeales		0	0	0	0	0	0	0	0	0	0	22	0	0	0	0	24	0	14	0	0	0	0	0	0	0	0	0	0	0	0	14	0	0	0	0	0	0	0	0	0	0
A_ASV01853	Archaea	Nanoarchaeota	Nanoarchaeia	Woesearchaeales	Un_Woesearchaeales	Un_Woesearchaeales	Un_Woesearchaeales		0	0	0	0	0	0	0	0	0	0	0	37	0	0	0	0	0	37	0	0	0	0	0	0	0	0	0	0	0	0	0	0	0	0	0	0	0	0	0	0	0
A_ASV01865	Archaea	Crenarchaeota	Bathyarchaeia	Un_Bathyarchaeia	Un_Bathyarchaeia	Un_Bathyarchaeia	Un_Bathyarchaeia		0	0	0	0	0	0	73	0	0	0	0	0	0	0	0	0	0	0	0	0	0	0	0	0	0	0	0	0	0	0	0	0	0	0	0	0	0	0	0	0	0
A_ASV01866	Archaea	Crenarchaeota	Bathyarchaeia	Un_Bathyarchaeia	Un_Bathyarchaeia	Un_Bathyarchaeia	Un_Bathyarchaeia		0	0	0	0	0	0	0	73	0	0	0	0	0	0	0	0	0	0	0	0	0	0	0	0	0	0	0	0	0	0	0	0	0	0	0	0	0	0	0	0	0
A_ASV01875	Archaea	Crenarchaeota	Bathyarchaeia	Un_Bathyarchaeia	Un_Bathyarchaeia	Un_Bathyarchaeia	Un_Bathyarchaeia		0	0	0	0	0	0	0	0	0	0	0	0	0	0	0	0	0	0	0	0	0	0	0	0	0	0	0	0	0	0	0	0	0	0	0	73	0	0	0	0	0
A_ASV01880	Archaea	Crenarchaeota	Bathyarchaeia	Un_Bathyarchaeia	Un_Bathyarchaeia	Un_Bathyarchaeia	Un_Bathyarchaeia		0	0	0	0	0	0	0	0	0	0	0	0	0	0	0	0	0	0	0	0	0	0	0	0	0	0	0	0	0	0	0	0	0	0	0	0	0	0	0	0	0
A_ASV01871	Archaea	Crenarchaeota	Bathyarchaeia	Un_Bathyarchaeia	Un_Bathyarchaeia	Un_Bathyarchaeia	Un_Bathyarchaeia		0	0	0	0	0	0	0	0	0	0	0	0	0	0	0	0	0	0	0	0	0	73	0	0	0	0	0	0	0	0	0	0	0	0	0	0	0	0	0	0	0
A_ASV01872	Archaea	Crenarchaeota	Bathyarchaeia	Un_Bathyarchaeia	Un_Bathyarchaeia	Un_Bathyarchaeia	Un_Bathyarchaeia		0	0	0	0	0	0	0	0	0	0	0	0	0	0	0	0	0	0	0	0	0	0	0	0	73	0	0	0	0	0	0	0	0	0	0	0	0	0	0	0	0
A_ASV01874	Archaea	Un_Archaea	Un_Archaea	Un_Archaea	Un_Archaea	Un_Archaea	Un_Archaea		0	0	0	0	0	0	0	0	0	0	0	0	0	0	0	0	0	0	0	0	0	0	0	0	0	0	0	0	0	0	0	0	0	73	0	0	0	0	0	0	0
A_ASV01862	Archaea	Nanoarchaeota	Nanoarchaeia	Woesearchaeales	Un_Woesearchaeales	Un_Woesearchaeales	Un_Woesearchaeales		0	27	46	0	0	0	0	0	0	0	0	0	0	0	0	0	0	0	0	0	0	0	0	0	0	0	0	0	0	0	0	0	0	0	0	0	0	0	0	0	0
A_ASV01863	Archaea	Nanoarchaeota	Nanoarchaeia	Woesearchaeales	Un_Woesearchaeales	Un_Woesearchaeales	Un_Woesearchaeales		0	0	0	37	0	0	36	0	0	0	0	0	0	0	0	0	0	0	0	0	0	0	0	0	0	0	0	0	0	0	0	0	0	0	0	0	0	0	0	0	0
A_ASV01879	Archaea	Nanoarchaeota	Nanoarchaeia	Woesearchaeales	Un_Woesearchaeales	Un_Woesearchaeales	Un_Woesearchaeales		0	0	0	0	0	0	0	0	0	0	0	0	0	0	0	0	0	0	0	0	0	0	0	0	0	0	0	0	0	0	0	0	0	0	0	0	0	0	0	73	0
A_ASV01877	Archaea	Nanoarchaeota	Nanoarchaeia	Woesearchaeales	Un_Woesearchaeales	Un_Woesearchaeales	Un_Woesearchaeales		0	0	0	0	0	0	0	0	0	0	0	0	0	0	0	0	0	0	0	0	0	0	0	0	0	0	0	0	0	0	0	0	0	0	0	0	23	37	13	0	0
A_ASV01869	Archaea	Nanoarchaeota	Nanoarchaeia	Woesearchaeales	SCGC AAA286-E23	Un_SCGC AAA286-E23	Un_SCGC AAA286-E23		0	0	0	0	0	0	0	0	0	0	0	0	0	0	0	0	0	0	73	0	0	0	0	0	0	0	0	0	0	0	0	0	0	0	0	0	0	0	0	0	0
A_ASV01876	Archaea	Nanoarchaeota	Nanoarchaeia	Woesearchaeales	SCGC AAA286-E23	Un_SCGC AAA286-E23	Un_SCGC AAA286-E23		0	0	0	0	0	0	0	0	0	0	0	0	0	0	0	0	0	0	0	0	0	0	0	0	0	0	0	0	0	0	0	0	0	0	0	0	44	29	0	0	0
A_ASV01867	Archaea	Thermoplasmatota	Thermoplasmata	Marine Benthic Group D and DHVEG-1	Un_Marine Benthic Group D and DHVEG-1	Un_Marine Benthic Group D and DHVEG-1	Un_Marine Benthic Group D and DHVEG-1		0	0	0	0	0	0	0	2	0	4	0	0	0	0	0	9	10	3	0	0	0	0	0	0	0	0	0	33	0	0	4	5	3	0	0	0	0	0	0	0	0
A_ASV01868	Archaea	Thermoplasmatota	Thermoplasmata	Marine Benthic Group D and DHVEG-1	Un_Marine Benthic Group D and DHVEG-1	Un_Marine Benthic Group D and DHVEG-1	Un_Marine Benthic Group D and DHVEG-1		0	0	0	0	0	0	0	0	73	0	0	0	0	0	0	0	0	0	0	0	0	0	0	0	0	0	0	0	0	0	0	0	0	0	0	0	0	0	0	0	0
A_ASV01895	Archaea	Asgardarchaeota	Lokiarchaeia	Lokiarchaeia	Lokiarchaeia	Lokiarchaeia	Lokiarchaeia		0	0	0	0	0	0	0	0	0	0	0	0	0	0	0	0	0	0	0	0	0	0	0	0	0	0	0	0	0	0	0	0	0	0	0	0	0	0	0	0	22
A_ASV01894	Archaea	Crenarchaeota	Bathyarchaeia	Un_Bathyarchaeia	Un_Bathyarchaeia	Un_Bathyarchaeia	Un_Bathyarchaeia		0	0	0	0	0	0	0	0	0	0	0	0	0	0	0	0	0	0	0	0	0	0	0	0	0	0	0	0	0	0	0	0	0	0	0	72	0	0	0	0	0
A_ASV01886	Archaea	Crenarchaeota	Nitrososphaeria	Caldiarchaeales	Geothermarchaeaceae	Un_Geothermarchaeaceae	Un_Geothermarchaeaceae		0	0	0	6	0	0	0	0	40	0	0	0	0	0	0	0	0	0	0	0	0	0	0	0	0	0	0	0	0	0	0	0	0	0	0	0	0	0	0	0	0
A_ASV01893	Archaea	Crenarchaeota	Nitrososphaeria	Nitrososphaerales	Nitrososphaeraceae	Un_Nitrososphaeraceae	Un_Nitrososphaeraceae		0	0	0	0	0	0	0	0	0	0	0	0	0	0	0	0	0	0	0	0	0	0	0	0	0	0	0	0	0	0	0	0	0	72	0	0	0	0	0	0	0
A_ASV01885	Archaea	Hydrothermarchaeota	Hydrothermarchaeia	Hydrothermarchaeales	Un_Hydrothermarchaeales	Un_Hydrothermarchaeales	Un_Hydrothermarchaeales		0	0	0	48	0	0	0	0	0	0	0	0	0	0	0	0	0	0	0	0	0	0	0	0	0	24	0	0	0	0	0	0	0	0	0	0	0	0	0	0	0
A_ASV01891	Archaea	Nanoarchaeota	Nanoarchaeia	Woesearchaeales	Un_Woesearchaeales	Un_Woesearchaeales	Un_Woesearchaeales		0	0	0	0	0	0	0	0	0	0	0	0	0	0	37	0	0	0	0	0	0	0	0	0	0	0	0	0	0	35	0	0	0	0	0	0	0	0	0	0	0
A_ASV01896	Archaea	Nanoarchaeota	Nanoarchaeia	Woesearchaeales	Un_Woesearchaeales	Un_Woesearchaeales	Un_Woesearchaeales		0	0	0	0	0	0	0	0	0	0	0	0	0	0	0	0	0	0	0	0	0	0	0	0	0	0	0	0	0	0	0	0	0	0	0	0	0	0	0	0	0
A_ASV01890	Archaea	Nanoarchaeota	Nanoarchaeia	Woesearchaeales	Un_Woesearchaeales	Un_Woesearchaeales	Un_Woesearchaeales		0	0	0	0	0	0	0	0	0	0	0	0	0	0	72	0	0	0	0	0	0	0	0	0	0	0	0	0	0	0	0	0	0	0	0	0	0	0	0	0	0
A_ASV01888	Archaea	Thermoplasmatota	Thermoplasmata	Marine Benthic Group D and DHVEG-1	Un_Marine Benthic Group D and DHVEG-1	Un_Marine Benthic Group D and DHVEG-1	Un_Marine Benthic Group D and DHVEG-1		0	0	0	0	0	39	33	0	0	0	0	0	0	0	0	0	0	0	0	0	0	0	0	0	0	0	0	0	0	0	0	0	0	0	0	0	0	0	0	0	0
A_ASV01882	Archaea	Thermoplasmatota	Thermoplasmata	Un_Thermoplasmata	Un_Thermoplasmata	Un_Thermoplasmata	Un_Thermoplasmata		14	0	0	0	0	0	0	58	0	0	0	0	0	0	0	0	0	0	0	0	0	0	0	0	0	0	0	0	0	0	0	0	0	0	0	0	0	0	0	0	0
A_ASV01887	Archaea	Thermoplasmatota	Thermoplasmata	Un_Thermoplasmata	Un_Thermoplasmata	Un_Thermoplasmata	Un_Thermoplasmata		0	0	0	0	72	0	0	0	0	0	0	0	0	0	0	0	0	0	0	0	0	0	0	0	0	0	0	0	0	0	0	0	0	0	0	0	0	0	0	0	0
A_ASV01913	Archaea	Crenarchaeota	Bathyarchaeia	Un_Bathyarchaeia	Un_Bathyarchaeia	Un_Bathyarchaeia	Un_Bathyarchaeia		0	0	0	0	0	0	0	0	0	0	0	0	0	0	0	0	0	0	0	0	0	0	0	0	0	0	0	0	0	0	0	0	0	0	0	0	0	0	0	0	0
A_ASV01898	Archaea	Crenarchaeota	Nitrososphaeria	Caldiarchaeales	Geothermarchaeaceae	Un_Geothermarchaeaceae	Un_Geothermarchaeaceae		0	16	0	0	0	0	0	0	0	0	0	0	0	0	0	0	0	0	0	0	0	0	0	0	0	0	0	0	0	0	0	0	0	0	0	0	0	0	0	0	0
A_ASV01907	Archaea	Crenarchaeota	Nitrososphaeria	Nitrosopumilales	Nitrosopumilaceae	Candidatus Nitrosopumilus	Un_Candidatus Nitrosopumilus		0	0	0	0	0	0	0	0	0	0	0	0	0	71	0	0	0	0	0	0	0	0	0	0	0	0	0	0	0	0	0	0	0	0	0	0	0	0	0	0	0
A_ASV01901	Archaea	Hydrothermarchaeota	Hydrothermarchaeia	Hydrothermarchaeales	Un_Hydrothermarchaeales	Un_Hydrothermarchaeales	Un_Hydrothermarchaeales		0	0	0	0	71	0	0	0	0	0	0	0	0	0	0	0	0	0	0	0	0	0	0	0	0	0	0	0	0	0	0	0	0	0	0	0	0	0	0	0	0
A_ASV01909	Archaea	Nanoarchaeota	Nanoarchaeia	Woesearchaeales	Un_Woesearchaeales	Un_Woesearchaeales	Un_Woesearchaeales		0	0	0	0	0	0	0	0	0	0	0	0	0	0	0	0	0	0	0	0	71	0	0	0	0	0	0	0	0	0	0	0	0	0	0	0	0	0	0	0	0
A_ASV01903	Archaea	Nanoarchaeota	Nanoarchaeia	Woesearchaeales	Un_Woesearchaeales	Un_Woesearchaeales	Un_Woesearchaeales		0	0	0	0	0	0	0	0	0	49	0	22	0	0	0	0	0	0	0	0	0	0	0	0	0	0	0	0	0	0	0	0	0	0	0	0	0	0	0	0	0
A_ASV01904	Archaea	Nanoarchaeota	Nanoarchaeia	Woesearchaeales	Un_Woesearchaeales	Un_Woesearchaeales	Un_Woesearchaeales		0	0	0	0	0	0	0	0	0	0	0	71	0	0	0	0	0	0	0	0	0	0	0	0	0	0	0	0	0	0	0	0	0	0	0	0	0	0	0	0	0
A_ASV01912	Archaea	Thermoplasmatota	Thermoplasmata	Marine Benthic Group D and DHVEG-1	Un_Marine Benthic Group D and DHVEG-1	Un_Marine Benthic Group D and DHVEG-1	Un_Marine Benthic Group D and DHVEG-1		0	0	0	0	0	0	0	0	0	0	0	0	0	0	0	0	0	0	0	0	0	0	0	0	0	0	0	0	0	0	0	0	0	0	0	0	0	0	0	71	0
A_ASV01919	Archaea	Asgardarchaeota	Lokiarchaeia	Lokiarchaeia	Lokiarchaeia	Lokiarchaeia	Lokiarchaeia		0	0	0	0	0	0	0	0	0	8	17	0	20	0	0	0	0	25	0	0	0	0	0	0	0	0	0	0	0	0	0	0	0	0	0	0	0	0	0	0	0
A_ASV01917	Archaea	Asgardarchaeota	Un_Asgardarchaeota	Un_Asgardarchaeota	Un_Asgardarchaeota	Un_Asgardarchaeota	Un_Asgardarchaeota		0	0	0	0	0	0	0	45	0	0	0	0	0	0	0	0	0	0	0	0	0	0	0	0	0	0	0	25	0	0	0	0	0	0	0	0	0	0	0	0	0
A_ASV01926	Archaea	Crenarchaeota	Bathyarchaeia	Un_Bathyarchaeia	Un_Bathyarchaeia	Un_Bathyarchaeia	Un_Bathyarchaeia		0	0	0	0	0	0	0	0	0	0	0	0	0	0	0	0	0	0	0	0	0	0	0	0	0	0	0	0	0	0	0	0	0	70	0	0	0	0	0	0	0
A_ASV01927	Archaea	Crenarchaeota	Bathyarchaeia	Un_Bathyarchaeia	Un_Bathyarchaeia	Un_Bathyarchaeia	Un_Bathyarchaeia		0	0	0	0	0	0	0	0	0	0	0	0	0	0	0	0	0	0	0	0	0	0	0	0	0	0	0	0	0	0	0	0	0	70	0	0	0	0	0	0	0
A_ASV01929	Archaea	Crenarchaeota	Nitrososphaeria	Nitrososphaerales	Nitrososphaeraceae	Un_Nitrososphaeraceae	Un_Nitrososphaeraceae		0	0	0	0	0	0	0	0	0	0	0	0	0	0	0	0	0	0	0	0	0	0	0	0	0	0	0	0	0	0	0	0	0	0	0	70	0	0	0	0	0
A_ASV01914	Archaea	Un_Archaea	Un_Archaea	Un_Archaea	Un_Archaea	Un_Archaea	Un_Archaea		0	0	0	0	20	0	0	0	0	0	26	24	0	0	0	0	0	0	0	0	0	0	0	0	0	0	0	0	0	0	0	0	0	0	0	0	0	0	0	0	0
A_ASV01920	Archaea	Nanoarchaeota	Nanoarchaeia	Woesearchaeales	Un_Woesearchaeales	Un_Woesearchaeales	Un_Woesearchaeales		0	0	0	0	0	0	0	0	0	0	0	0	70	0	0	0	0	0	0	0	0	0	0	0	0	0	0	0	0	0	0	0	0	0	0	0	0	0	0	0	0
A_ASV01916	Archaea	Thermoplasmatota	Thermoplasmata	Marine Benthic Group D and DHVEG-1	Un_Marine Benthic Group D and DHVEG-1	Un_Marine Benthic Group D and DHVEG-1	Un_Marine Benthic Group D and DHVEG-1		0	0	0	0	0	32	0	0	0	0	0	0	0	0	0	0	38	0	0	0	0	0	0	0	0	0	0	0	0	0	0	0	0	0	0	0	0	0	0	0	0
A_ASV01925	Archaea	Thermoplasmatota	Thermoplasmata	Marine Benthic Group D and DHVEG-1	Un_Marine Benthic Group D and DHVEG-1	Un_Marine Benthic Group D and DHVEG-1	Un_Marine Benthic Group D and DHVEG-1		0	0	0	0	0	0	0	0	0	0	0	0	0	0	0	0	0	0	0	0	0	0	0	0	0	0	0	0	0	0	0	0	70	0	0	0	0	0	0	0	0
A_ASV01922	Archaea	Thermoplasmatota	Thermoplasmata	SG8-5	Un_SG8-5	Un_SG8-5	Un_SG8-5		0	0	0	0	0	0	0	0	0	0	0	0	0	0	56	0	0	0	0	0	0	0	0	0	0	0	0	14	0	0	0	0	0	0	0	0	0	0	0	0	0
A_ASV01944	Archaea	Crenarchaeota	Bathyarchaeia	Un_Bathyarchaeia	Un_Bathyarchaeia	Un_Bathyarchaeia	Un_Bathyarchaeia		0	0	0	0	0	0	0	0	0	0	0	0	0	0	0	0	0	0	0	0	0	0	0	0	0	0	69	0	0	0	0	0	0	0	0	0	0	0	0	0	0
A_ASV01949	Archaea	Crenarchaeota	Bathyarchaeia	Un_Bathyarchaeia	Un_Bathyarchaeia	Un_Bathyarchaeia	Un_Bathyarchaeia		0	0	0	0	0	0	0	0	0	0	0	0	0	0	0	0	0	0	0	0	0	0	0	0	0	0	0	0	0	0	0	21	0	0	0	0	0	0	0	0	48
A_ASV01950	Archaea	Crenarchaeota	Bathyarchaeia	Un_Bathyarchaeia	Un_Bathyarchaeia	Un_Bathyarchaeia	Un_Bathyarchaeia		0	0	0	0	0	0	0	0	0	0	0	0	0	0	0	0	0	0	0	0	0	0	0	0	0	0	0	0	0	0	0	0	69	0	0	0	0	0	0	0	0
A_ASV01952	Archaea	Crenarchaeota	Bathyarchaeia	Un_Bathyarchaeia	Un_Bathyarchaeia	Un_Bathyarchaeia	Un_Bathyarchaeia		0	0	0	0	0	0	0	0	0	0	0	0	0	0	0	0	0	0	0	0	0	0	0	0	0	0	0	0	0	0	0	0	0	69	0	0	0	0	0	0	0
A_ASV01954	Archaea	Crenarchaeota	Bathyarchaeia	Un_Bathyarchaeia	Un_Bathyarchaeia	Un_Bathyarchaeia	Un_Bathyarchaeia		0	0	0	0	0	0	0	0	0	0	0	0	0	0	0	0	0	0	0	0	0	0	0	0	0	0	0	0	0	0	0	0	0	0	69	0	0	0	0	0	0
A_ASV01955	Archaea	Crenarchaeota	Bathyarchaeia	Un_Bathyarchaeia	Un_Bathyarchaeia	Un_Bathyarchaeia	Un_Bathyarchaeia		0	0	0	0	0	0	0	0	0	0	0	0	0	0	0	0	0	0	0	0	0	0	0	0	0	0	0	0	0	0	0	0	0	0	0	69	0	0	0	0	0
A_ASV01956	Archaea	Crenarchaeota	Nitrososphaeria	Nitrosopumilales	Nitrosopumilaceae	Un_Nitrosopumilaceae	Un_Nitrosopumilaceae		0	0	0	0	0	0	0	0	0	0	0	0	0	0	0	0	0	0	0	0	0	0	0	0	0	0	0	0	0	0	0	0	0	0	0	0	0	0	69	0	0
A_ASV01948	Archaea	Halobacterota	Methanosarcinia	Methanosarciniales	Methanosaetaceae	Methanosaeta	Un_Methanosaeta		0	0	0	0	0	0	0	0	0	0	0	0	0	0	0	0	0	0	0	0	0	0	0	0	0	0	0	0	0	0	0	69	0	0	0	0	0	0	0	0	0
A_ASV01946	Archaea	Halobacterota	Methanosarcinia	Methanosarciniales	Methanosarcinaceae	Methanosarcina	Un_Methanosarcina		0	0	0	0	0	0	0	0	0	0	0	0	0	0	0	0	0	0	0	0	0	0	0	0	0	0	0	0	0	69	0	0	0	0	0	0	0	0	0	0	0
A_ASV01958	Archaea	Un_Archaea	Un_Archaea	Un_Archaea	Un_Archaea	Un_Archaea	Un_Archaea		0	0	0	0	0	0	0	0	0	0	0	0	0	0	0	0	0	0	0	0	0	0	0	0	0	0	0	0	0	0	0	0	0	0	0	0	0	0	0	0	0
A_ASV01947	Archaea	Nanoarchaeota	Nanoarchaeia	Woesearchaeales	Un_Woesearchaeales	Un_Woesearchaeales	Un_Woesearchaeales		0	0	0	0	0	0	0	0	0	0	0	0	0	0	0	0	0	0	0	0	0	0	0	0	0	0	0	0	0	0	69	0	0	0	0	0	0	0	0	0	0
A_ASV01935	Archaea	Nanoarchaeota	Nanoarchaeia	Woesearchaeales	Un_Woesearchaeales	Un_Woesearchaeales	Un_Woesearchaeales		0	0	0	0	0	0	0	35	0	0	0	0	0	0	0	0	0	0	0	0	0	0	0	0	0	0	0	0	0	0	0	0	0	0	0	0	0	0	0	0	0
A_ASV01953	Archaea	Nanoarchaeota	Nanoarchaeia	Woesearchaeales	Un_Woesearchaeales	Un_Woesearchaeales	Un_Woesearchaeales		0	0	0	0	0	0	0	0	0	0	0	0	0	0	0	0	0	0	0	0	0	0	0	0	0	0	0	0	0	0	0	0	0	0	69	0	0	0	0	0	0
A_ASV01941	Archaea	Nanoarchaeota	Nanoarchaeia	Woesearchaeales	Un_Woesearchaeales	Un_Woesearchaeales	Un_Woesearchaeales		0	0	0	0	0	0	0	0	0	0	0	0	0	0	0	0	0	0	69	0	0	0	0	0	0	0	0	0	0	0	0	0	0	0	0	0	0	0	0	0	0
A_ASV01934	Archaea	Thermoplasmatota	Thermoplasmata	Marine Benthic Group D and DHVEG-1	Un_Marine Benthic Group D and DHVEG-1	Un_Marine Benthic Group D and DHVEG-1	Un_Marine Benthic Group D and DHVEG-1		0	0	0	0	0	0	0	69	0	0	0	0	0	0	0	0	0	0	0	0	0	0	0	0	0	0	0	0	0	0	0	0	0	0	0	0	0	0	0	0	0
A_ASV01936	Archaea	Thermoplasmatota	Thermoplasmata	Marine Benthic Group D and DHVEG-1	Un_Marine Benthic Group D and DHVEG-1	Un_Marine Benthic Group D and DHVEG-1	Un_Marine Benthic Group D and DHVEG-1		0	0	0	0	0	0	0	3	0	0	0	0	0	0	0	22	22	0	0	0	0	0	0	0	0	0	0	0	0	0	0	0	0	0	0	0	0	0	0	0	0
A_ASV01940	Archaea	Thermoplasmatota	Thermoplasmata	Marine Benthic Group D and DHVEG-1	Un_Marine Benthic Group D and DHVEG-1	Un_Marine Benthic Group D and DHVEG-1	Un_Marine Benthic Group D and DHVEG-1		0	0	0	0	0	0	0	0	0	0	0	0	0	0	0	0	0	0	69	0	0	0	0	0	0	0	0	0	0	0	0	0	0	0	0	0	0	0	0	0	0
A_ASV01939	Archaea	Thermoplasmatota	Thermoplasmata	Un_Thermoplasmata	Un_Thermoplasmata	Un_Thermoplasmata	Un_Thermoplasmata		0	0	0	0	0	0	0	0	0	0	0	0	0	0	0	0	69	0	0	0	0	0	0	0	0	0	0	0	0	0	0	0	0	0	0	0	0	0	0	0	0
A_ASV01957	Archaea	Thermoplasmatota	Thermoplasmata	Un_Thermoplasmata	Un_Thermoplasmata	Un_Thermoplasmata	Un_Thermoplasmata		0	0	0	0	0	0	0	0	0	0	0	0	0	0	0	0	0	0	0	0	0	0	0	0	0	0	0	0	0	0	0	0	0	0	0	0	0	0	0	0	0
A_ASV01967	Archaea	Asgardarchaeota	Heimdallarchaeia	Un_Heimdallarchaeia	Un_Heimdallarchaeia	Un_Heimdallarchaeia	Un_Heimdallarchaeia		0	0	0	0	0	0	0	0	0	0	0	0	0	0	0	0	0	0	0	68	0	0	0	0	0	0	0	0	0	0	0	0	0	0	0	0	0	0	0	0	0
A_ASV01970	Archaea	Asgardarchaeota	Un_Asgardarchaeota	Un_Asgardarchaeota	Un_Asgardarchaeota	Un_Asgardarchaeota	Un_Asgardarchaeota		0	0	0	0	0	0	0	0	0	0	0	0	0	0	0	0	0	0	0	0	0	0	0	0	0	0	0	0	0	0	68	0	0	0	0	0	0	0	0	0	0
A_ASV01971	Archaea	Asgardarchaeota	Odinarchaeia	Un_Odinarchaeia	Un_Odinarchaeia	Un_Odinarchaeia	Un_Odinarchaeia		0	0	0	0	0	0	0	0	0	0	0	0	0	0	0	0	0	0	0	0	0	0	0	0	0	0	0	0	0	0	0	0	0	0	0	68	0	0	0	0	0
A_ASV01959	Archaea	Crenarchaeota	Bathyarchaeia	Un_Bathyarchaeia	Un_Bathyarchaeia	Un_Bathyarchaeia	Un_Bathyarchaeia		0	0	0	0	49	0	0	0	0	0	0	0	0	0	0	0	0	0	0	0	0	0	0	0	0	0	0	0	0	0	0	0	0	1	0	0	0	0	0	0	18
A_ASV01963	Archaea	Crenarchaeota	Bathyarchaeia	Un_Bathyarchaeia	Un_Bathyarchaeia	Un_Bathyarchaeia	Un_Bathyarchaeia		0	0	0	0	0	0	0	0	0	0	0	0	38	0	30	0	0	0	0	0	0	0	0	0	0	0	0	0	0	0	0	0	0	0	0	0	0	0	0	0	0
A_ASV01965	Archaea	Crenarchaeota	Bathyarchaeia	Un_Bathyarchaeia	Un_Bathyarchaeia	Un_Bathyarchaeia	Un_Bathyarchaeia		0	0	0	0	0	0	0	0	0	0	0	0	0	0	0	0	14	0	0	0	0	0	0	0	0	0	0	0	0	0	0	0	0	54	0	0	0	0	0	0	0
A_ASV01968	Archaea	Crenarchaeota	Bathyarchaeia	Un_Bathyarchaeia	Un_Bathyarchaeia	Un_Bathyarchaeia	Un_Bathyarchaeia		0	0	0	0	0	0	0	0	0	0	0	0	0	0	0	0	0	0	0	0	0	0	0	0	68	0	0	0	0	0	0	0	0	0	0	0	0	0	0	0	0
A_ASV01962	Archaea	Euryarchaeota	Thermococci	Methanofastidiosales	Un_Methanofastidiosales	Un_Methanofastidiosales	Un_Methanofastidiosales		0	0	0	0	0	0	0	68	0	0	0	0	0	0	0	0	0	0	0	0	0	0	0	0	0	0	0	0	0	0	0	0	0	0	0	0	0	0	0	0	0
A_ASV01976	Archaea	Hydrothermarchaeota	Hydrothermarchaeia	Hydrothermarchaeales	Un_Hydrothermarchaeales	Un_Hydrothermarchaeales	Un_Hydrothermarchaeales		0	0	0	0	0	0	0	0	0	0	0	0	0	0	0	0	0	0	0	0	0	0	0	0	0	0	0	0	0	0	0	0	0	0	0	0	0	0	0	68	0
A_ASV01977	Archaea	Un_Archaea	Un_Archaea	Un_Archaea	Un_Archaea	Un_Archaea	Un_Archaea		0	0	0	0	0	0	0	0	0	0	0	0	0	0	0	0	0	0	0	0	0	0	0	0	0	0	0	0	0	0	0	0	0	0	0	0	0	0	0	0	0
A_ASV01960	Archaea	Nanoarchaeota	Nanoarchaeia	Woesearchaeales	Un_Woesearchaeales	Un_Woesearchaeales	Un_Woesearchaeales		0	0	0	0	6	0	0	0	0	0	18	0	0	21	23	0	0	0	0	0	0	0	0	0	0	0	0	0	0	0	0	0	0	0	0	0	0	0	0	0	0
A_ASV01964	Archaea	Nanoarchaeota	Nanoarchaeia	Woesearchaeales	Un_Woesearchaeales	Un_Woesearchaeales	Un_Woesearchaeales		0	0	0	0	0	0	0	0	0	0	0	0	0	0	68	0	0	0	0	0	0	0	0	0	0	0	0	0	0	0	0	0	0	0	0	0	0	0	0	0	0
A_ASV01966	Archaea	Nanoarchaeota	Nanoarchaeia	Woesearchaeales	Un_Woesearchaeales	Un_Woesearchaeales	Un_Woesearchaeales		0	0	0	0	0	0	0	0	0	0	0	0	0	0	0	0	0	0	68	0	0	0	0	0	0	0	0	0	0	0	0	0	0	0	0	0	0	0	0	0	0
A_ASV01990	Archaea	Asgardarchaeota	Lokiarchaeia	Lokiarchaeia	Lokiarchaeia	Lokiarchaeia	Lokiarchaeia		0	0	0	0	0	0	0	0	0	0	0	0	0	0	0	0	0	0	0	0	0	0	0	0	0	0	0	0	0	0	0	0	0	67	0	0	0	0	0	0	0
A_ASV01992	Archaea	Asgardarchaeota	Lokiarchaeia	Lokiarchaeia	Lokiarchaeia	Lokiarchaeia	Lokiarchaeia		0	0	0	0	0	0	0	0	0	0	0	0	0	0	0	0	0	0	0	0	0	0	0	0	0	0	0	0	0	0	0	0	0	0	0	0	0	0	0	0	0
A_ASV01980	Archaea	Crenarchaeota	Bathyarchaeia	Un_Bathyarchaeia	Un_Bathyarchaeia	Un_Bathyarchaeia	Un_Bathyarchaeia		0	0	0	0	0	0	0	26	0	0	0	0	0	0	0	0	0	0	0	0	0	41	0	0	0	0	0	0	0	0	0	0	0	0	0	0	0	0	0	0	0
A_ASV01989	Archaea	Crenarchaeota	Bathyarchaeia	Un_Bathyarchaeia	Un_Bathyarchaeia	Un_Bathyarchaeia	Un_Bathyarchaeia		0	0	0	0	0	0	0	0	0	0	0	0	0	0	0	0	0	0	0	0	0	0	0	0	0	0	0	0	0	0	0	0	0	67	0	0	0	0	0	0	0
A_ASV01988	Archaea	Euryarchaeota	Thermococci	Methanofastidiosales	Un_Methanofastidiosales	Un_Methanofastidiosales	Un_Methanofastidiosales		0	0	0	0	0	0	0	0	0	0	0	0	0	0	0	0	0	0	0	0	0	0	0	0	0	0	0	0	0	0	28	0	0	0	39	0	0	0	0	0	0
A_ASV01981	Archaea	Nanoarchaeota	Nanoarchaeia	Woesearchaeales	Un_Woesearchaeales	Un_Woesearchaeales	Un_Woesearchaeales		0	0	0	0	0	0	0	0	27	0	0	0	0	0	0	0	0	0	0	0	0	0	0	0	0	0	0	0	0	0	40	0	0	0	0	0	0	0	0	0	0
A_ASV01982	Archaea	Nanoarchaeota	Nanoarchaeia	Woesearchaeales	Un_Woesearchaeales	Un_Woesearchaeales	Un_Woesearchaeales		0	0	0	0	0	0	0	0	0	53	0	0	0	0	0	0	0	0	0	0	0	0	0	0	0	0	0	0	14	0	0	0	0	0	0	0	0	0	0	0	0
A_ASV01983	Archaea	Nanoarchaeota	Nanoarchaeia	Woesearchaeales	Un_Woesearchaeales	Un_Woesearchaeales	Un_Woesearchaeales		0	0	0	0	0	0	0	0	0	17	0	29	0	0	0	0	0	21	0	0	0	0	0	0	0	0	0	0	0	0	0	0	0	0	0	0	0	0	0	0	0
A_ASV01984	Archaea	Nanoarchaeota	Nanoarchaeia	Woesearchaeales	Un_Woesearchaeales	Un_Woesearchaeales	Un_Woesearchaeales		0	0	0	0	0	0	0	0	0	0	0	0	0	33	0	0	0	34	0	0	0	0	0	0	0	0	0	0	0	0	0	0	0	0	0	0	0	0	0	0	0
A_ASV01998	Archaea	Asgardarchaeota	Un_Asgardarchaeota	Un_Asgardarchaeota	Un_Asgardarchaeota	Un_Asgardarchaeota	Un_Asgardarchaeota		0	0	0	0	0	26	0	0	0	0	0	0	0	0	0	0	0	0	0	0	0	0	0	0	0	0	0	0	0	0	0	0	0	0	0	0	0	0	0	0	0
A_ASV01999	Archaea	Crenarchaeota	Bathyarchaeia	Un_Bathyarchaeia	Un_Bathyarchaeia	Un_Bathyarchaeia	Un_Bathyarchaeia		0	0	0	0	0	0	27	0	26	0	0	0	0	0	0	0	0	13	0	0	0	0	0	0	0	0	0	0	0	0	0	0	0	0	0	0	0	0	0	0	0
A_ASV02000	Archaea	Crenarchaeota	Bathyarchaeia	Un_Bathyarchaeia	Un_Bathyarchaeia	Un_Bathyarchaeia	Un_Bathyarchaeia		0	0	0	0	0	0	0	66	0	0	0	0	0	0	0	0	0	0	0	0	0	0	0	0	0	0	0	0	0	0	0	0	0	0	0	0	0	0	0	0	0
A_ASV02004	Archaea	Crenarchaeota	Bathyarchaeia	Un_Bathyarchaeia	Un_Bathyarchaeia	Un_Bathyarchaeia	Un_Bathyarchaeia		0	0	0	0	0	0	0	0	0	0	0	0	0	15	0	13	0	0	0	0	0	0	0	0	0	0	0	0	0	0	0	0	0	0	0	0	0	0	0	0	0
A_ASV02007	Archaea	Crenarchaeota	Bathyarchaeia	Un_Bathyarchaeia	Un_Bathyarchaeia	Un_Bathyarchaeia	Un_Bathyarchaeia		0	0	0	0	0	0	0	0	0	0	0	0	0	0	0	0	0	0	0	0	0	0	0	0	0	0	0	0	66	0	0	0	0	0	0	0	0	0	0	0	0
A_ASV02011	Archaea	Crenarchaeota	Bathyarchaeia	Un_Bathyarchaeia	Un_Bathyarchaeia	Un_Bathyarchaeia	Un_Bathyarchaeia		0	0	0	0	0	0	0	0	0	0	0	0	0	0	0	0	0	0	0	0	0	0	0	0	0	0	0	0	0	0	0	0	0	0	0	66	0	0	0	0	0
A_ASV02012	Archaea	Crenarchaeota	Bathyarchaeia	Un_Bathyarchaeia	Un_Bathyarchaeia	Un_Bathyarchaeia	Un_Bathyarchaeia		0	0	0	0	0	0	0	0	0	0	0	0	0	0	0	0	0	0	0	0	0	0	0	0	0	0	0	0	0	0	0	0	0	0	0	66	0	0	0	0	0
A_ASV02009	Archaea	Crenarchaeota	Bathyarchaeia	Un_Bathyarchaeia	Un_Bathyarchaeia	Un_Bathyarchaeia	Un_Bathyarchaeia		0	0	0	0	0	0	0	0	0	0	0	0	0	0	0	0	0	0	0	0	0	0	0	0	0	0	0	0	12	17	37	0	0	0	0	0	0	0	0	0	0
A_ASV02013	Archaea	Crenarchaeota	Nitrososphaeria	Nitrosopumilales	Nitrosopumilaceae	Un_Nitrosopumilaceae	Un_Nitrosopumilaceae		0	0	0	0	0	0	0	0	0	0	0	0	0	0	0	0	0	0	0	0	0	0	0	0	0	0	0	0	0	0	0	0	0	0	0	0	0	66	0	0	0
A_ASV02014	Archaea	Crenarchaeota	Nitrososphaeria	Nitrosopumilales	Nitrosopumilaceae	Un_Nitrosopumilaceae	Un_Nitrosopumilaceae		0	0	0	0	0	0	0	0	0	0	0	0	0	0	0	0	0	0	0	0	0	0	0	0	0	0	0	0	0	0	0	0	0	0	0	0	0	0	0	66	0
A_ASV01996	Archaea	Nanoarchaeota	Nanoarchaeia	Woesearchaeales	Un_Woesearchaeales	Un_Woesearchaeales	Un_Woesearchaeales		12	0	0	0	0	0	0	0	0	0	34	20	0	0	0	0	0	0	0	0	0	0	0	0	0	0	0	0	0	0	0	0	0	0	0	0	0	0	0	0	0
A_ASV02003	Archaea	Nanoarchaeota	Nanoarchaeia	Woesearchaeales	Un_Woesearchaeales	Un_Woesearchaeales	Un_Woesearchaeales		0	0	0	0	0	0	0	0	0	0	0	0	43	0	0	0	0	0	23	0	0	0	0	0	0	0	0	0	0	0	0	0	0	0	0	0	0	0	0	0	0
A_ASV02005	Archaea	Thermoplasmatota	Thermoplasmata	JdFR-43	Un_JdFR-43	Un_JdFR-43	Un_JdFR-43		0	0	0	0	0	0	0	0	0	0	0	0	0	0	0	0	23	12	0	0	0	0	0	0	0	0	0	0	0	0	0	19	12	0	0	0	0	0	0	0	0
A_ASV02018	Archaea	Crenarchaeota	Bathyarchaeia	Un_Bathyarchaeia	Un_Bathyarchaeia	Un_Bathyarchaeia	Un_Bathyarchaeia		0	0	0	0	0	20	0	0	35	0	0	0	0	0	0	0	0	0	0	0	0	0	0	0	0	0	0	0	0	0	0	0	0	0	0	0	0	0	0	0	0
A_ASV02019	Archaea	Crenarchaeota	Bathyarchaeia	Un_Bathyarchaeia	Un_Bathyarchaeia	Un_Bathyarchaeia	Un_Bathyarchaeia		0	0	0	0	0	0	0	0	65	0	0	0	0	0	0	0	0	0	0	0	0	0	0	0	0	0	0	0	0	0	0	0	0	0	0	0	0	0	0	0	0
A_ASV02024	Archaea	Crenarchaeota	Bathyarchaeia	Un_Bathyarchaeia	Un_Bathyarchaeia	Un_Bathyarchaeia	Un_Bathyarchaeia		0	0	0	0	0	0	0	0	0	0	0	0	0	0	0	0	0	0	65	0	0	0	0	0	0	0	0	0	0	0	0	0	0	0	0	0	0	0	0	0	0
A_ASV02027	Archaea	Crenarchaeota	Bathyarchaeia	Un_Bathyarchaeia	Un_Bathyarchaeia	Un_Bathyarchaeia	Un_Bathyarchaeia		0	0	0	0	0	0	0	0	0	0	0	0	0	0	0	0	0	0	0	0	0	0	0	0	0	0	0	0	0	0	0	0	0	65	0	0	0	0	0	0	0
A_ASV02029	Archaea	Crenarchaeota	Bathyarchaeia	Un_Bathyarchaeia	Un_Bathyarchaeia	Un_Bathyarchaeia	Un_Bathyarchaeia		0	0	0	0	0	0	0	0	0	0	0	0	0	0	0	0	0	0	0	0	0	0	0	0	0	0	0	0	0	0	0	0	0	0	65	0	0	0	0	0	0
A_ASV02026	Archaea	Crenarchaeota	Bathyarchaeia	Un_Bathyarchaeia	Un_Bathyarchaeia	Un_Bathyarchaeia	Un_Bathyarchaeia		0	0	0	0	0	0	0	0	0	0	0	0	0	0	0	0	0	0	0	0	0	0	0	0	0	0	0	0	0	0	0	65	0	0	0	0	0	0	0	0	0
A_ASV02030	Archaea	Crenarchaeota	Bathyarchaeia	Un_Bathyarchaeia	Un_Bathyarchaeia	Un_Bathyarchaeia	Un_Bathyarchaeia		0	0	0	0	0	0	0	0	0	0	0	0	0	0	0	0	0	0	0	0	0	0	0	0	0	0	0	0	0	0	0	0	0	0	0	65	0	0	0	0	0
A_ASV02022	Archaea	Crenarchaeota	Nitrososphaeria	Marine Benthic Group A	Un_Marine Benthic Group A	Un_Marine Benthic Group A	Un_Marine Benthic Group A		0	0	0	0	0	0	0	0	0	0	0	0	0	0	0	0	0	0	65	0	0	0	0	0	0	0	0	0	0	0	0	0	0	0	0	0	0	0	0	0	0
A_ASV02035	Archaea	Un_Archaea	Un_Archaea	Un_Archaea	Un_Archaea	Un_Archaea	Un_Archaea		0	0	0	0	0	0	0	0	0	0	0	0	0	0	0	0	0	0	0	0	0	0	0	0	0	0	0	0	0	0	0	0	0	0	0	0	0	0	0	0	65
A_ASV02034	Archaea	Nanoarchaeota	Nanoarchaeia	Woesearchaeales	Un_Woesearchaeales	Un_Woesearchaeales	Un_Woesearchaeales		0	0	0	0	0	0	0	0	0	0	0	0	0	0	0	0	0	0	0	0	0	0	0	0	0	0	0	0	0	0	0	0	0	0	0	0	0	0	0	65	0
A_ASV02017	Archaea	Nanoarchaeota	Nanoarchaeia	Woesearchaeales	Un_Woesearchaeales	Un_Woesearchaeales	Un_Woesearchaeales		0	0	0	0	16	0	0	0	0	17	0	0	0	0	32	0	0	0	0	0	0	0	0	0	0	0	0	0	0	0	0	0	0	0	0	0	0	0	0	0	0
A_ASV02023	Archaea	Nanoarchaeota	Nanoarchaeia	Woesearchaeales	Un_Woesearchaeales	Un_Woesearchaeales	Un_Woesearchaeales		0	0	0	0	0	0	0	0	0	0	0	0	0	0	0	0	0	0	65	0	0	0	0	0	0	0	0	0	0	0	0	0	0	0	0	0	0	0	0	0	0
A_ASV02031	Archaea	Nanoarchaeota	Nanoarchaeia	Woesearchaeales	Un_Woesearchaeales	Un_Woesearchaeales	Un_Woesearchaeales		0	0	0	0	0	0	0	0	0	0	0	0	0	0	0	0	0	0	0	0	0	0	0	0	0	0	0	0	0	0	0	0	0	0	0	0	0	65	0	0	0
A_ASV02036	Archaea	Nanoarchaeota	Nanoarchaeia	Woesearchaeales	Un_Woesearchaeales	Un_Woesearchaeales	Un_Woesearchaeales		0	0	0	0	0	0	0	0	0	0	0	0	0	0	0	0	0	0	0	0	0	0	0	0	0	0	0	0	0	0	0	0	0	0	0	0	0	0	0	0	0
A_ASV02021	Archaea	Thermoplasmatota	Un_Thermoplasmatota	Un_Thermoplasmatota	Un_Thermoplasmatota	Un_Thermoplasmatota	Un_Thermoplasmatota		0	0	0	0	0	0	0	0	0	0	0	54	0	0	0	0	0	0	0	0	0	0	0	0	0	0	0	0	0	0	0	0	0	0	0	0	11	0	0	0	0
A_ASV02033	Archaea	Thermoplasmatota	Thermoplasmata	Un_Thermoplasmata	Un_Thermoplasmata	Un_Thermoplasmata	Un_Thermoplasmata		0	0	0	0	0	0	0	0	0	0	0	0	0	0	0	0	0	0	0	0	0	0	0	0	0	0	0	0	0	0	0	0	0	0	0	0	0	0	0	65	0
A_ASV02042	Archaea	Crenarchaeota	Bathyarchaeia	Un_Bathyarchaeia	Un_Bathyarchaeia	Un_Bathyarchaeia	Un_Bathyarchaeia		0	0	0	0	0	0	0	0	64	0	0	0	0	0	0	0	0	0	0	0	0	0	0	0	0	0	0	0	0	0	0	0	0	0	0	0	0	0	0	0	0
A_ASV02051	Archaea	Crenarchaeota	Bathyarchaeia	Un_Bathyarchaeia	Un_Bathyarchaeia	Un_Bathyarchaeia	Un_Bathyarchaeia		0	0	0	0	0	0	0	0	0	0	0	0	0	0	0	0	0	0	0	0	0	0	0	0	64	0	0	0	0	0	0	0	0	0	0	0	0	0	0	0	0
A_ASV02057	Archaea	Crenarchaeota	Nitrososphaeria	Marine Benthic Group A	Un_Marine Benthic Group A	Un_Marine Benthic Group A	Un_Marine Benthic Group A		0	0	0	0	0	0	0	0	0	0	0	0	0	0	0	0	0	0	0	0	0	0	0	0	0	0	0	0	0	0	0	0	0	0	0	0	0	0	0	25	0
A_ASV02052	Archaea	Un_Archaea	Un_Archaea	Un_Archaea	Un_Archaea	Un_Archaea	Un_Archaea		0	0	0	0	0	0	0	0	0	0	0	0	0	0	0	0	0	0	0	0	0	0	0	0	0	0	0	0	0	0	64	0	0	0	0	0	0	0	0	0	0
A_ASV02049	Archaea	Nanoarchaeota	Nanoarchaeia	Woesearchaeales	Un_Woesearchaeales	Un_Woesearchaeales	Un_Woesearchaeales		0	0	0	0	0	0	0	0	0	0	0	0	0	0	0	0	0	0	48	0	0	0	0	0	0	0	0	16	0	0	0	0	0	0	0	0	0	0	0	0	0
A_ASV02053	Archaea	Nanoarchaeota	Nanoarchaeia	Woesearchaeales	Un_Woesearchaeales	Un_Woesearchaeales	Un_Woesearchaeales		0	0	0	0	0	0	0	0	0	0	0	0	0	0	0	0	0	0	0	0	0	0	0	0	0	0	0	0	0	0	39	25	0	0	0	0	0	0	0	0	0
A_ASV02056	Archaea	Nanoarchaeota	Nanoarchaeia	Woesearchaeales	Un_Woesearchaeales	Un_Woesearchaeales	Un_Woesearchaeales		0	0	0	0	0	0	0	0	0	0	0	0	0	0	0	0	0	0	0	0	0	0	0	0	0	0	0	0	0	0	0	0	0	0	0	0	0	0	0	64	0
A_ASV02043	Archaea	Thermoplasmatota	Thermoplasmata	Marine Benthic Group D and DHVEG-1	Un_Marine Benthic Group D and DHVEG-1	Un_Marine Benthic Group D and DHVEG-1	Un_Marine Benthic Group D and DHVEG-1		0	0	0	0	0	0	0	0	41	0	0	0	0	0	0	0	0	0	0	0	0	0	0	0	0	0	0	0	0	0	0	0	0	0	0	0	0	0	0	0	0
A_ASV02045	Archaea	Thermoplasmatota	Thermoplasmata	Marine Benthic Group D and DHVEG-1	Un_Marine Benthic Group D and DHVEG-1	Un_Marine Benthic Group D and DHVEG-1	Un_Marine Benthic Group D and DHVEG-1		0	0	0	0	0	0	0	0	0	0	0	0	14	0	0	0	50	0	0	0	0	0	0	0	0	0	0	0	0	0	0	0	0	0	0	0	0	0	0	0	0
A_ASV02047	Archaea	Thermoplasmatota	Thermoplasmata	Marine Benthic Group D and DHVEG-1	Un_Marine Benthic Group D and DHVEG-1	Un_Marine Benthic Group D and DHVEG-1	Un_Marine Benthic Group D and DHVEG-1		0	0	0	0	0	0	0	0	0	0	0	0	0	0	0	0	34	0	0	0	0	0	0	0	0	0	0	0	0	0	12	4	14	0	0	0	0	0	0	0	0
A_ASV02068	Archaea	Asgardarchaeota	Lokiarchaeia	Lokiarchaeia	Lokiarchaeia	Lokiarchaeia	Lokiarchaeia		0	0	0	0	0	0	0	0	0	0	0	0	0	0	0	0	26	0	0	0	0	0	0	0	0	0	0	0	0	0	0	0	0	37	0	0	0	0	0	0	0
A_ASV02076	Archaea	Crenarchaeota	Bathyarchaeia	Un_Bathyarchaeia	Un_Bathyarchaeia	Un_Bathyarchaeia	Un_Bathyarchaeia		0	0	0	0	0	0	0	0	0	0	0	0	0	0	0	0	0	0	0	0	0	0	0	0	0	0	0	0	0	0	0	0	0	63	0	0	0	0	0	0	0
A_ASV02078	Archaea	Crenarchaeota	Bathyarchaeia	Un_Bathyarchaeia	Un_Bathyarchaeia	Un_Bathyarchaeia	Un_Bathyarchaeia		0	0	0	0	0	0	0	0	0	0	0	0	0	0	0	0	0	0	0	0	0	0	0	0	0	0	0	0	0	0	0	0	0	0	0	63	0	0	0	0	0
A_ASV02079	Archaea	Crenarchaeota	Bathyarchaeia	Un_Bathyarchaeia	Un_Bathyarchaeia	Un_Bathyarchaeia	Un_Bathyarchaeia		0	0	0	0	0	0	0	0	0	0	0	0	0	0	0	0	0	0	0	0	0	0	0	0	0	0	0	0	0	0	0	0	0	0	0	63	0	0	0	0	0
A_ASV02081	Archaea	Crenarchaeota	Bathyarchaeia	Un_Bathyarchaeia	Un_Bathyarchaeia	Un_Bathyarchaeia	Un_Bathyarchaeia		0	0	0	0	0	0	0	0	0	0	0	0	0	0	0	0	0	0	0	0	0	0	0	0	0	0	0	0	0	0	0	0	0	0	0	0	0	0	0	63	0
A_ASV02080	Archaea	Crenarchaeota	Nitrososphaeria	Nitrosopumilales	Nitrosopumilaceae	Un_Nitrosopumilaceae	Un_Nitrosopumilaceae		0	0	0	0	0	0	0	0	0	0	0	0	0	0	0	0	0	0	0	0	0	0	0	0	0	0	0	0	0	0	0	0	0	0	0	0	0	0	0	63	0
A_ASV02075	Archaea	Nanoarchaeota	Nanoarchaeia	Woesearchaeales	Un_Woesearchaeales	Un_Woesearchaeales	Un_Woesearchaeales		0	0	0	0	0	0	0	0	0	0	0	0	0	0	0	0	0	0	0	0	0	0	0	0	0	0	0	0	63	0	0	0	0	0	0	0	0	0	0	0	0
A_ASV02082	Archaea	Nanoarchaeota	Nanoarchaeia	Woesearchaeales	Un_Woesearchaeales	Un_Woesearchaeales	Un_Woesearchaeales		0	0	0	0	0	0	0	0	0	0	0	0	0	0	0	0	0	0	0	0	0	0	0	0	0	0	0	0	0	0	0	0	0	0	0	0	0	0	0	63	0
A_ASV02061	Archaea	Thermoplasmatota	Thermoplasmata	Marine Benthic Group D and DHVEG-1	Un_Marine Benthic Group D and DHVEG-1	Un_Marine Benthic Group D and DHVEG-1	Un_Marine Benthic Group D and DHVEG-1		0	0	0	0	0	0	0	63	0	0	0	0	0	0	0	0	0	0	0	0	0	0	0	0	0	0	0	0	0	0	0	0	0	0	0	0	0	0	0	0	0
A_ASV02083	Archaea	Thermoplasmatota	Thermoplasmata	Un_Thermoplasmata	Un_Thermoplasmata	Un_Thermoplasmata	Un_Thermoplasmata		0	0	0	0	0	0	0	0	0	0	0	0	0	0	0	0	0	0	0	0	0	0	0	0	0	0	0	0	0	0	0	0	0	0	0	0	0	0	0	0	0
A_ASV02067	Archaea	Thermoplasmatota	Thermoplasmata	Un_Thermoplasmata	Un_Thermoplasmata	Un_Thermoplasmata	Un_Thermoplasmata		0	0	0	0	0	0	0	0	0	0	0	0	0	0	0	0	63	0	0	0	0	0	0	0	0	0	0	0	0	0	0	0	0	0	0	0	0	0	0	0	0
A_ASV02099	Archaea	Asgardarchaeota	Un_Asgardarchaeota	Un_Asgardarchaeota	Un_Asgardarchaeota	Un_Asgardarchaeota	Un_Asgardarchaeota		0	0	0	0	0	0	0	0	0	0	0	0	0	0	0	0	0	0	62	0	0	0	0	0	0	0	0	0	0	0	0	0	0	0	0	0	0	0	0	0	0
A_ASV02092	Archaea	Crenarchaeota	Bathyarchaeia	Un_Bathyarchaeia	Un_Bathyarchaeia	Un_Bathyarchaeia	Un_Bathyarchaeia		0	0	0	0	0	0	0	0	30	0	0	0	0	0	0	0	0	0	32	0	0	0	0	0	0	0	0	0	0	0	0	0	0	0	0	0	0	0	0	0	0
A_ASV02084	Archaea	Un_Archaea	Un_Archaea	Un_Archaea	Un_Archaea	Un_Archaea	Un_Archaea		62	0	0	0	0	0	0	0	0	0	0	0	0	0	0	0	0	0	0	0	0	0	0	0	0	0	0	0	0	0	0	0	0	0	0	0	0	0	0	0	0
A_ASV02088	Archaea	Un_Archaea	Un_Archaea	Un_Archaea	Un_Archaea	Un_Archaea	Un_Archaea		0	0	0	62	0	0	0	0	0	0	0	0	0	0	0	0	0	0	0	0	0	0	0	0	0	0	0	0	0	0	0	0	0	0	0	0	0	0	0	0	0
A_ASV02102	Archaea	Nanoarchaeota	Nanoarchaeia	Woesearchaeales	Un_Woesearchaeales	Un_Woesearchaeales	Un_Woesearchaeales		0	0	0	0	0	0	0	0	0	0	0	0	0	0	0	0	0	0	0	0	0	0	0	0	0	0	0	35	0	0	27	0	0	0	0	0	0	0	0	0	0
A_ASV02095	Archaea	Nanoarchaeota	Nanoarchaeia	Woesearchaeales	Un_Woesearchaeales	Un_Woesearchaeales	Un_Woesearchaeales		0	0	0	0	0	0	0	0	0	0	0	0	18	0	44	0	0	0	0	0	0	0	0	0	0	0	0	0	0	0	0	0	0	0	0	0	0	0	0	0	0
A_ASV02096	Archaea	Nanoarchaeota	Nanoarchaeia	Woesearchaeales	Un_Woesearchaeales	Un_Woesearchaeales	Un_Woesearchaeales		0	0	0	0	0	0	0	0	0	0	0	0	0	31	20	11	0	0	0	0	0	0	0	0	0	0	0	0	0	0	0	0	0	0	0	0	0	0	0	0	0
A_ASV02105	Archaea	Nanoarchaeota	Nanoarchaeia	Woesearchaeales	Un_Woesearchaeales	Un_Woesearchaeales	Un_Woesearchaeales		0	0	0	0	0	0	0	0	0	0	0	0	0	0	0	0	0	0	0	0	0	0	0	0	0	0	0	0	0	0	0	0	0	0	0	0	18	44	0	0	0
A_ASV02094	Archaea	Nanoarchaeota	Nanoarchaeia	Woesearchaeales	Un_Woesearchaeales	Un_Woesearchaeales	Un_Woesearchaeales		0	0	0	0	0	0	0	0	0	0	0	0	62	0	0	0	0	0	0	0	0	0	0	0	0	0	0	0	0	0	0	0	0	0	0	0	0	0	0	0	0
A_ASV02106	Archaea	Thermoplasmatota	Un_Thermoplasmatota	Un_Thermoplasmatota	Un_Thermoplasmatota	Un_Thermoplasmatota	Un_Thermoplasmatota		0	0	0	0	0	0	0	0	0	0	0	0	0	0	0	0	0	0	0	0	0	0	0	0	0	0	0	0	0	0	0	0	0	0	0	0	0	0	0	62	0
A_ASV02129	Archaea	Asgardarchaeota	Odinarchaeia	Un_Odinarchaeia	Un_Odinarchaeia	Un_Odinarchaeia	Un_Odinarchaeia		0	0	0	0	0	0	0	0	0	0	0	0	0	0	0	0	0	0	0	0	0	0	0	0	0	0	0	0	0	0	0	0	0	0	0	0	0	0	0	0	0
A_ASV02111	Archaea	Crenarchaeota	Bathyarchaeia	Un_Bathyarchaeia	Un_Bathyarchaeia	Un_Bathyarchaeia	Un_Bathyarchaeia		0	0	0	0	0	0	0	31	0	0	0	0	0	0	0	0	0	0	0	0	0	0	0	0	0	0	0	0	0	13	0	0	0	0	0	0	0	0	0	0	0
A_ASV02112	Archaea	Crenarchaeota	Bathyarchaeia	Un_Bathyarchaeia	Un_Bathyarchaeia	Un_Bathyarchaeia	Un_Bathyarchaeia		0	0	0	0	0	0	0	0	61	0	0	0	0	0	0	0	0	0	0	0	0	0	0	0	0	0	0	0	0	0	0	0	0	0	0	0	0	0	0	0	0
A_ASV02126	Archaea	Crenarchaeota	Bathyarchaeia	Un_Bathyarchaeia	Un_Bathyarchaeia	Un_Bathyarchaeia	Un_Bathyarchaeia		0	0	0	0	0	0	0	0	0	0	0	0	0	0	0	0	0	0	0	0	0	0	0	0	0	0	0	0	0	0	0	0	0	61	0	0	0	0	0	0	0
A_ASV02110	Archaea	Crenarchaeota	Nitrososphaeria	Un_Nitrososphaeria	Un_Nitrososphaeria	Un_Nitrososphaeria	Un_Nitrososphaeria		0	0	0	0	0	0	13	18	0	0	0	0	0	0	0	0	0	0	0	0	0	0	0	0	0	0	0	0	0	0	0	0	0	0	0	0	0	0	0	17	0
A_ASV02124	Archaea	Halobacterota	Methanocellia	Methanocellales	Methanocellaceae	Rice Cluster I	Un_Rice Cluster I		0	0	0	0	0	0	0	0	0	0	0	0	0	0	0	0	0	0	0	0	0	0	0	0	0	0	0	0	0	0	0	0	0	61	0	0	0	0	0	0	0
A_ASV02128	Archaea	Un_Archaea	Un_Archaea	Un_Archaea	Un_Archaea	Un_Archaea	Un_Archaea		0	0	0	0	0	0	0	0	0	0	0	0	0	0	0	0	0	0	0	0	0	0	0	0	0	0	0	0	0	0	0	0	0	0	0	0	0	0	0	61	0
A_ASV02113	Archaea	Nanoarchaeota	Nanoarchaeia	Woesearchaeales	Un_Woesearchaeales	Un_Woesearchaeales	Un_Woesearchaeales		0	0	0	0	0	0	0	0	46	0	15	0	0	0	0	0	0	0	0	0	0	0	0	0	0	0	0	0	0	0	0	0	0	0	0	0	0	0	0	0	0
A_ASV02121	Archaea	Nanoarchaeota	Nanoarchaeia	Woesearchaeales	Un_Woesearchaeales	Un_Woesearchaeales	Un_Woesearchaeales		0	0	0	0	0	0	0	0	0	0	0	0	0	0	0	0	0	0	61	0	0	0	0	0	0	0	0	0	0	0	0	0	0	0	0	0	0	0	0	0	0
A_ASV02107	Archaea	Nanoarchaeota	Nanoarchaeia	Woesearchaeales	Un_Woesearchaeales	Un_Woesearchaeales	Un_Woesearchaeales		0	34	27	0	0	0	0	0	0	0	0	0	0	0	0	0	0	0	0	0	0	0	0	0	0	0	0	0	0	0	0	0	0	0	0	0	0	0	0	0	0
A_ASV02127	Archaea	Nanoarchaeota	Nanoarchaeia	Woesearchaeales	Un_Woesearchaeales	Un_Woesearchaeales	Un_Woesearchaeales		0	0	0	0	0	0	0	0	0	0	0	0	0	0	0	0	0	0	0	0	0	0	0	0	0	0	0	0	0	0	0	0	0	0	0	0	61	0	0	0	0
A_ASV02143	Archaea	Crenarchaeota	Bathyarchaeia	Un_Bathyarchaeia	Un_Bathyarchaeia	Un_Bathyarchaeia	Un_Bathyarchaeia		0	0	0	0	0	0	0	0	0	0	0	0	0	0	0	0	0	0	0	0	0	0	0	0	60	0	0	0	0	0	0	0	0	0	0	0	0	0	0	0	0
A_ASV02145	Archaea	Crenarchaeota	Bathyarchaeia	Un_Bathyarchaeia	Un_Bathyarchaeia	Un_Bathyarchaeia	Un_Bathyarchaeia		0	0	0	0	0	0	0	0	0	0	0	0	0	0	0	0	0	0	0	0	0	0	0	0	0	0	0	0	60	0	0	0	0	0	0	0	0	0	0	0	0
A_ASV02147	Archaea	Crenarchaeota	Bathyarchaeia	Un_Bathyarchaeia	Un_Bathyarchaeia	Un_Bathyarchaeia	Un_Bathyarchaeia		0	0	0	0	0	0	0	0	0	0	0	0	0	0	0	0	0	0	0	0	0	0	0	0	0	0	0	0	0	0	0	0	0	60	0	0	0	0	0	0	0
A_ASV02148	Archaea	Crenarchaeota	Bathyarchaeia	Un_Bathyarchaeia	Un_Bathyarchaeia	Un_Bathyarchaeia	Un_Bathyarchaeia		0	0	0	0	0	0	0	0	0	0	0	0	0	0	0	0	0	0	0	0	0	0	0	0	0	0	0	0	0	0	0	0	0	60	0	0	0	0	0	0	0
A_ASV02150	Archaea	Crenarchaeota	Bathyarchaeia	Un_Bathyarchaeia	Un_Bathyarchaeia	Un_Bathyarchaeia	Un_Bathyarchaeia		0	0	0	0	0	0	0	0	0	0	0	0	0	0	0	0	0	0	0	0	0	0	0	0	0	0	0	0	0	0	0	0	0	0	0	60	0	0	0	0	0
A_ASV02155	Archaea	Crenarchaeota	Bathyarchaeia	Un_Bathyarchaeia	Un_Bathyarchaeia	Un_Bathyarchaeia	Un_Bathyarchaeia		0	0	0	0	0	0	0	0	0	0	0	0	0	0	0	0	0	0	0	0	0	0	0	0	0	0	0	0	0	0	0	0	0	0	0	0	0	0	0	0	0
A_ASV02140	Archaea	Nanoarchaeota	Nanoarchaeia	Woesearchaeales	Un_Woesearchaeales	Un_Woesearchaeales	Un_Woesearchaeales		0	0	0	0	0	0	0	0	0	0	0	0	60	0	0	0	0	0	0	0	0	0	0	0	0	0	0	0	0	0	0	0	0	0	0	0	0	0	0	0	0
A_ASV02144	Archaea	Nanoarchaeota	Nanoarchaeia	Woesearchaeales	Un_Woesearchaeales	Un_Woesearchaeales	Un_Woesearchaeales		0	0	0	0	0	0	0	0	0	0	0	0	0	0	0	0	0	0	0	0	0	0	0	0	0	0	0	12	14	0	25	9	0	0	0	0	0	0	0	0	0
A_ASV02153	Archaea	Nanoarchaeota	Nanoarchaeia	Woesearchaeales	Un_Woesearchaeales	Un_Woesearchaeales	Un_Woesearchaeales		0	0	0	0	0	0	0	0	0	0	0	0	0	0	0	0	0	0	0	0	0	0	0	0	0	0	0	0	0	0	0	0	0	0	0	0	0	17	43	0	0
A_ASV02152	Archaea	Thermoplasmatota	Thermoplasmata	Marine Benthic Group D and DHVEG-1	Un_Marine Benthic Group D and DHVEG-1	Un_Marine Benthic Group D and DHVEG-1	Un_Marine Benthic Group D and DHVEG-1		0	0	0	0	0	0	0	0	0	0	0	0	0	0	0	0	0	0	0	0	0	0	0	0	0	0	0	0	0	0	0	0	0	0	0	0	60	0	0	0	0
A_ASV02138	Archaea	Thermoplasmatota	Thermoplasmata	Un_Thermoplasmata	Un_Thermoplasmata	Un_Thermoplasmata	Un_Thermoplasmata		0	0	0	0	60	0	0	0	0	0	0	0	0	0	0	0	0	0	0	0	0	0	0	0	0	0	0	0	0	0	0	0	0	0	0	0	0	0	0	0	0
A_ASV02159	Archaea	Crenarchaeota	Bathyarchaeia	Un_Bathyarchaeia	Un_Bathyarchaeia	Un_Bathyarchaeia	Un_Bathyarchaeia		0	0	0	0	0	0	0	30	0	0	0	0	0	0	0	0	0	0	29	0	0	0	0	0	0	0	0	0	0	0	0	0	0	0	0	0	0	0	0	0	0
A_ASV02162	Archaea	Crenarchaeota	Bathyarchaeia	Un_Bathyarchaeia	Un_Bathyarchaeia	Un_Bathyarchaeia	Un_Bathyarchaeia		0	0	0	0	0	0	0	0	0	0	0	0	59	0	0	0	0	0	0	0	0	0	0	0	0	0	0	0	0	0	0	0	0	0	0	0	0	0	0	0	0
A_ASV02166	Archaea	Crenarchaeota	Bathyarchaeia	Un_Bathyarchaeia	Un_Bathyarchaeia	Un_Bathyarchaeia	Un_Bathyarchaeia		0	0	0	0	0	0	0	0	0	0	0	0	0	0	0	0	0	0	0	0	0	0	0	0	59	0	0	0	0	0	0	0	0	0	0	0	0	0	0	0	0
A_ASV02168	Archaea	Crenarchaeota	Bathyarchaeia	Un_Bathyarchaeia	Un_Bathyarchaeia	Un_Bathyarchaeia	Un_Bathyarchaeia		0	0	0	0	0	0	0	0	0	0	0	0	0	0	0	0	0	0	0	0	0	0	0	0	0	0	0	0	0	0	0	0	0	59	0	0	0	0	0	0	0
A_ASV02176	Archaea	Crenarchaeota	Bathyarchaeia	Un_Bathyarchaeia	Un_Bathyarchaeia	Un_Bathyarchaeia	Un_Bathyarchaeia		0	0	0	0	0	0	0	0	0	0	0	0	0	0	0	0	0	0	0	0	0	0	0	0	0	0	0	0	0	0	0	0	0	0	0	0	0	0	0	59	0
A_ASV02171	Archaea	Euryarchaeota	Thermococci	Methanofastidiosales	Un_Methanofastidiosales	Un_Methanofastidiosales	Un_Methanofastidiosales		0	0	0	0	0	0	0	0	0	0	0	0	0	0	0	0	0	0	0	0	0	0	0	0	0	0	0	0	0	0	0	0	0	0	0	59	0	0	0	0	0
A_ASV02164	Archaea	Un_Archaea	Un_Archaea	Un_Archaea	Un_Archaea	Un_Archaea	Un_Archaea		0	0	0	0	0	0	0	0	0	0	0	0	0	0	59	0	0	0	0	0	0	0	0	0	0	0	0	0	0	0	0	0	0	0	0	0	0	0	0	0	0
A_ASV02177	Archaea	Nanoarchaeota	Nanoarchaeia	Woesearchaeales	Un_Woesearchaeales	Un_Woesearchaeales	Un_Woesearchaeales		0	0	0	0	0	0	0	0	0	0	0	0	0	0	0	0	0	0	0	0	0	0	0	0	0	0	0	0	0	0	0	0	0	0	0	0	0	0	0	42	0
A_ASV02157	Archaea	Nanoarchaeota	Nanoarchaeia	Woesearchaeales	Un_Woesearchaeales	Un_Woesearchaeales	Un_Woesearchaeales		0	0	0	0	0	19	0	0	0	0	12	0	0	0	0	0	0	0	0	0	0	0	0	0	0	0	0	0	16	0	0	12	0	0	0	0	0	0	0	0	0
A_ASV02172	Archaea	Nanoarchaeota	Nanoarchaeia	Woesearchaeales	Un_Woesearchaeales	Un_Woesearchaeales	Un_Woesearchaeales		0	0	0	0	0	0	0	0	0	0	0	0	0	0	0	0	0	0	0	0	0	0	0	0	0	0	0	0	0	0	0	0	0	0	0	0	0	0	59	0	0
A_ASV02174	Archaea	Nanoarchaeota	Nanoarchaeia	Woesearchaeales	Un_Woesearchaeales	Un_Woesearchaeales	Un_Woesearchaeales		0	0	0	0	0	0	0	0	0	0	0	0	0	0	0	0	0	0	0	0	0	0	0	0	0	0	0	0	0	0	0	0	0	0	0	0	0	0	0	59	0
A_ASV02175	Archaea	Nanoarchaeota	Nanoarchaeia	Woesearchaeales	Un_Woesearchaeales	Un_Woesearchaeales	Un_Woesearchaeales		0	0	0	0	0	0	0	0	0	0	0	0	0	0	0	0	0	0	0	0	0	0	0	0	0	0	0	0	0	0	0	0	0	0	0	0	0	0	0	59	0
A_ASV02161	Archaea	Nanoarchaeota	Nanoarchaeia	Woesearchaeales	Un_Woesearchaeales	Un_Woesearchaeales	Un_Woesearchaeales		0	0	0	0	0	0	0	0	0	0	0	25	34	0	0	0	0	0	0	0	0	0	0	0	0	0	0	0	0	0	0	0	0	0	0	0	0	0	0	0	0
A_ASV02158	Archaea	Thermoplasmatota	Thermoplasmata	Marine Benthic Group D and DHVEG-1	Un_Marine Benthic Group D and DHVEG-1	Un_Marine Benthic Group D and DHVEG-1	Un_Marine Benthic Group D and DHVEG-1		0	0	0	0	0	0	59	0	0	0	0	0	0	0	0	0	0	0	0	0	0	0	0	0	0	0	0	0	0	0	0	0	0	0	0	0	0	0	0	0	0
A_ASV02167	Archaea	Thermoplasmatota	Thermoplasmata	Marine Benthic Group D and DHVEG-1	Un_Marine Benthic Group D and DHVEG-1	Un_Marine Benthic Group D and DHVEG-1	Un_Marine Benthic Group D and DHVEG-1		0	0	0	0	0	0	0	0	0	0	0	0	0	0	0	0	0	0	0	0	0	0	0	0	0	0	0	0	0	0	59	0	0	0	0	0	0	0	0	0	0
A_ASV02169	Archaea	Thermoplasmatota	Thermoplasmata	Un_Thermoplasmata	Un_Thermoplasmata	Un_Thermoplasmata	Un_Thermoplasmata		0	0	0	0	0	0	0	0	0	0	0	0	0	0	0	0	0	0	0	0	0	0	0	0	0	0	0	0	0	0	0	0	0	59	0	0	0	0	0	0	0
A_ASV02178	Archaea	Thermoplasmatota	Thermoplasmata	Un_Thermoplasmata	Un_Thermoplasmata	Un_Thermoplasmata	Un_Thermoplasmata		0	0	0	0	0	0	0	0	0	0	0	0	0	0	0	0	0	0	0	0	0	0	0	0	0	0	0	0	0	0	0	0	0	0	0	0	0	0	0	0	0
A_ASV02163	Archaea	Thermoplasmatota	Thermoplasmata	Un_Thermoplasmata	Un_Thermoplasmata	Un_Thermoplasmata	Un_Thermoplasmata		0	0	0	0	0	0	0	0	0	0	0	0	0	0	59	0	0	0	0	0	0	0	0	0	0	0	0	0	0	0	0	0	0	0	0	0	0	0	0	0	0
A_ASV02198	Archaea	Asgardarchaeota	Odinarchaeia	Un_Odinarchaeia	Un_Odinarchaeia	Un_Odinarchaeia	Un_Odinarchaeia		0	0	0	0	0	0	0	0	0	0	0	0	0	0	0	0	0	0	0	0	0	0	0	0	0	0	0	0	0	0	0	0	0	0	0	58	0	0	0	0	0
A_ASV02183	Archaea	Crenarchaeota	Bathyarchaeia	Un_Bathyarchaeia	Un_Bathyarchaeia	Un_Bathyarchaeia	Un_Bathyarchaeia		0	0	0	0	0	0	30	28	0	0	0	0	0	0	0	0	0	0	0	0	0	0	0	0	0	0	0	0	0	0	0	0	0	0	0	0	0	0	0	0	0
A_ASV02185	Archaea	Crenarchaeota	Bathyarchaeia	Un_Bathyarchaeia	Un_Bathyarchaeia	Un_Bathyarchaeia	Un_Bathyarchaeia		0	0	0	0	0	0	0	0	58	0	0	0	0	0	0	0	0	0	0	0	0	0	0	0	0	0	0	0	0	0	0	0	0	0	0	0	0	0	0	0	0
A_ASV02186	Archaea	Crenarchaeota	Bathyarchaeia	Un_Bathyarchaeia	Un_Bathyarchaeia	Un_Bathyarchaeia	Un_Bathyarchaeia		0	0	0	0	0	0	0	0	58	0	0	0	0	0	0	0	0	0	0	0	0	0	0	0	0	0	0	0	0	0	0	0	0	0	0	0	0	0	0	0	0
A_ASV02199	Archaea	Crenarchaeota	Bathyarchaeia	Un_Bathyarchaeia	Un_Bathyarchaeia	Un_Bathyarchaeia	Un_Bathyarchaeia		0	0	0	0	0	0	0	0	0	0	0	0	0	0	0	0	0	0	0	0	0	0	0	0	0	0	0	0	0	0	0	0	0	0	0	58	0	0	0	0	0
A_ASV02197	Archaea	Crenarchaeota	Bathyarchaeia	Un_Bathyarchaeia	Un_Bathyarchaeia	Un_Bathyarchaeia	Un_Bathyarchaeia		0	0	0	0	0	0	0	0	0	0	0	0	0	0	0	0	0	0	0	0	0	0	0	0	0	0	0	0	0	0	0	0	0	0	58	0	0	0	0	0	0
A_ASV02180	Archaea	Hydrothermarchaeota	Hydrothermarchaeia	Hydrothermarchaeales	Un_Hydrothermarchaeales	Un_Hydrothermarchaeales	Un_Hydrothermarchaeales		0	0	0	29	0	0	0	29	0	0	0	0	0	0	0	0	0	0	0	0	0	0	0	0	0	0	0	0	0	0	0	0	0	0	0	0	0	0	0	0	0
A_ASV02194	Archaea	Un_Archaea	Un_Archaea	Un_Archaea	Un_Archaea	Un_Archaea	Un_Archaea		0	0	0	0	0	0	0	0	0	0	0	0	0	0	0	0	0	0	0	0	0	0	58	0	0	0	0	0	0	0	0	0	0	0	0	0	0	0	0	0	0
A_ASV02190	Archaea	Un_Archaea	Un_Archaea	Un_Archaea	Un_Archaea	Un_Archaea	Un_Archaea		0	0	0	0	0	0	0	0	0	0	0	0	58	0	0	0	0	0	0	0	0	0	0	0	0	0	0	0	0	0	0	0	0	0	0	0	0	0	0	0	0
A_ASV02187	Archaea	Nanoarchaeota	Nanoarchaeia	Woesearchaeales	SCGC AAA286-E23	Un_SCGC AAA286-E23	Un_SCGC AAA286-E23		0	0	0	0	0	0	0	0	0	28	15	0	0	0	0	0	0	0	0	0	0	0	0	0	0	0	0	0	0	0	0	0	0	0	0	0	0	0	15	0	0
A_ASV02184	Archaea	Thermoplasmatota	Thermoplasmata	Marine Benthic Group D and DHVEG-1	Un_Marine Benthic Group D and DHVEG-1	Un_Marine Benthic Group D and DHVEG-1	Un_Marine Benthic Group D and DHVEG-1		0	0	0	0	0	0	0	58	0	0	0	0	0	0	0	0	0	0	0	0	0	0	0	0	0	0	0	0	0	0	0	0	0	0	0	0	0	0	0	0	0
A_ASV02202	Archaea	Crenarchaeota	Bathyarchaeia	Un_Bathyarchaeia	Un_Bathyarchaeia	Un_Bathyarchaeia	Un_Bathyarchaeia		57	0	0	0	0	0	0	0	0	0	0	0	0	0	0	0	0	0	0	0	0	0	0	0	0	0	0	0	0	0	0	0	0	0	0	0	0	0	0	0	0
A_ASV02216	Archaea	Crenarchaeota	Bathyarchaeia	Un_Bathyarchaeia	Un_Bathyarchaeia	Un_Bathyarchaeia	Un_Bathyarchaeia		0	0	0	0	0	0	0	0	0	0	0	0	0	0	0	0	0	0	0	0	0	0	0	0	0	0	0	0	0	0	0	0	0	57	0	0	0	0	0	0	0
A_ASV02218	Archaea	Crenarchaeota	Bathyarchaeia	Un_Bathyarchaeia	Un_Bathyarchaeia	Un_Bathyarchaeia	Un_Bathyarchaeia		0	0	0	0	0	0	0	0	0	0	0	0	0	0	0	0	0	0	0	0	0	0	0	0	0	0	0	0	0	0	0	0	0	57	0	0	0	0	0	0	0
A_ASV02220	Archaea	Crenarchaeota	Bathyarchaeia	Un_Bathyarchaeia	Un_Bathyarchaeia	Un_Bathyarchaeia	Un_Bathyarchaeia		0	0	0	0	0	0	0	0	0	0	0	0	0	0	0	0	0	0	0	0	0	0	0	0	0	0	0	0	0	0	0	0	0	0	57	0	0	0	0	0	0
A_ASV02225	Archaea	Crenarchaeota	Bathyarchaeia	Un_Bathyarchaeia	Un_Bathyarchaeia	Un_Bathyarchaeia	Un_Bathyarchaeia		0	0	0	0	0	0	0	0	0	0	0	0	0	0	0	0	0	0	0	0	0	0	0	0	0	0	0	0	0	0	0	0	0	0	0	0	0	0	0	0	38
A_ASV02222	Archaea	Crenarchaeota	Nitrososphaeria	Nitrosopumilales	Nitrosopumilaceae	Un_Nitrosopumilaceae	Un_Nitrosopumilaceae		0	0	0	0	0	0	0	0	0	0	0	0	0	0	0	0	0	0	0	0	0	0	0	0	0	0	0	0	0	0	0	0	0	0	0	0	57	0	0	0	0
A_ASV02214	Archaea	Euryarchaeota	Methanobacteria	Methanobacteriales	Methanobacteriaceae	Methanobacterium	Methanobacterium		0	0	0	0	0	0	0	0	0	0	0	0	0	0	0	0	0	0	0	0	0	0	0	0	0	0	0	0	0	0	0	26	31	0	0	0	0	0	0	0	0
A_ASV02212	Archaea	Nanoarchaeota	Nanoarchaeia	Woesearchaeales	Un_Woesearchaeales	Un_Woesearchaeales	Un_Woesearchaeales		0	0	0	0	0	0	0	0	0	0	0	0	0	0	0	0	0	0	0	0	0	0	0	0	0	0	0	32	0	0	25	0	0	0	0	0	0	0	0	0	0
A_ASV02224	Archaea	Thermoplasmatota	Thermoplasmata	Marine Benthic Group D and DHVEG-1	Un_Marine Benthic Group D and DHVEG-1	Un_Marine Benthic Group D and DHVEG-1	Un_Marine Benthic Group D and DHVEG-1		0	0	0	0	0	0	0	0	0	0	0	0	0	0	0	0	0	0	0	0	0	0	0	0	0	0	0	0	0	0	0	0	0	0	0	0	0	0	15	0	0
A_ASV02233	Archaea	Asgardarchaeota	Heimdallarchaeia	Un_Heimdallarchaeia	Un_Heimdallarchaeia	Un_Heimdallarchaeia	Un_Heimdallarchaeia		0	0	0	0	0	0	0	0	0	0	0	0	56	0	0	0	0	0	0	0	0	0	0	0	0	0	0	0	0	0	0	0	0	0	0	0	0	0	0	0	0
A_ASV02229	Archaea	Crenarchaeota	Bathyarchaeia	Un_Bathyarchaeia	Un_Bathyarchaeia	Un_Bathyarchaeia	Un_Bathyarchaeia		0	0	0	0	0	0	0	56	0	0	0	0	0	0	0	0	0	0	0	0	0	0	0	0	0	0	0	0	0	0	0	0	0	0	0	0	0	0	0	0	0
A_ASV02243	Archaea	Crenarchaeota	Bathyarchaeia	Un_Bathyarchaeia	Un_Bathyarchaeia	Un_Bathyarchaeia	Un_Bathyarchaeia		0	0	0	0	0	0	0	0	0	0	0	0	0	0	0	0	0	0	0	0	0	0	0	0	0	0	0	0	0	0	0	0	0	56	0	0	0	0	0	0	0
A_ASV02244	Archaea	Crenarchaeota	Bathyarchaeia	Un_Bathyarchaeia	Un_Bathyarchaeia	Un_Bathyarchaeia	Un_Bathyarchaeia		0	0	0	0	0	0	0	0	0	0	0	0	0	0	0	0	0	0	0	0	0	0	0	0	0	0	0	0	0	0	0	0	0	56	0	0	0	0	0	0	0
A_ASV02245	Archaea	Crenarchaeota	Bathyarchaeia	Un_Bathyarchaeia	Un_Bathyarchaeia	Un_Bathyarchaeia	Un_Bathyarchaeia		0	0	0	0	0	0	0	0	0	0	0	0	0	0	0	0	0	0	0	0	0	0	0	0	0	0	0	0	0	0	0	0	0	0	56	0	0	0	0	0	0
A_ASV02238	Archaea	Crenarchaeota	Bathyarchaeia	Un_Bathyarchaeia	Un_Bathyarchaeia	Un_Bathyarchaeia	Un_Bathyarchaeia		0	0	0	0	0	0	0	0	0	0	0	0	0	0	0	0	56	0	0	0	0	0	0	0	0	0	0	0	0	0	0	0	0	0	0	0	0	0	0	0	0
A_ASV02236	Archaea	Hydrothermarchaeota	Hydrothermarchaeia	Hydrothermarchaeales	Un_Hydrothermarchaeales	Un_Hydrothermarchaeales	Un_Hydrothermarchaeales		0	0	0	0	0	0	0	0	0	0	0	0	0	0	56	0	0	0	0	0	0	0	0	0	0	0	0	0	0	0	0	0	0	0	0	0	0	0	0	0	0
A_ASV02249	Archaea	Hydrothermarchaeota	Hydrothermarchaeia	Hydrothermarchaeales	Un_Hydrothermarchaeales	Un_Hydrothermarchaeales	Un_Hydrothermarchaeales		0	0	0	0	0	0	0	0	0	0	0	0	0	0	0	0	0	0	0	0	0	0	0	0	0	0	0	0	0	0	0	0	0	0	0	0	0	0	0	56	0
A_ASV02237	Archaea	Micrarchaeota	Micrarchaeia	Micrarchaeales	Un_Micrarchaeales	Un_Micrarchaeales	Un_Micrarchaeales		0	0	0	0	0	0	0	0	0	0	0	0	0	0	28	0	0	0	0	0	0	0	0	0	0	0	0	0	0	0	0	0	28	0	0	0	0	0	0	0	0
A_ASV02247	Archaea	Un_Archaea	Un_Archaea	Un_Archaea	Un_Archaea	Un_Archaea	Un_Archaea		0	0	0	0	0	0	0	0	0	0	0	0	0	0	0	0	0	0	0	0	0	0	0	0	0	0	0	0	0	0	0	0	0	0	0	56	0	0	0	0	0
A_ASV02228	Archaea	Nanoarchaeota	Nanoarchaeia	Woesearchaeales	Un_Woesearchaeales	Un_Woesearchaeales	Un_Woesearchaeales		0	0	0	0	30	0	0	0	0	0	0	0	0	0	0	26	0	0	0	0	0	0	0	0	0	0	0	0	0	0	0	0	0	0	0	0	0	0	0	0	0
A_ASV02227	Archaea	Nanoarchaeota	Nanoarchaeia	Woesearchaeales	Un_Woesearchaeales	Un_Woesearchaeales	Un_Woesearchaeales		0	0	0	0	45	0	0	0	0	0	0	11	0	0	0	0	0	0	0	0	0	0	0	0	0	0	0	0	0	0	0	0	0	0	0	0	0	0	0	0	0
A_ASV02232	Archaea	Nanoarchaeota	Nanoarchaeia	Woesearchaeales	Un_Woesearchaeales	Un_Woesearchaeales	Un_Woesearchaeales		0	0	0	0	0	0	0	0	0	0	0	20	0	0	0	0	0	0	0	0	0	0	0	0	0	0	0	0	0	0	0	0	36	0	0	0	0	0	0	0	0
A_ASV02240	Archaea	Nanoarchaeota	Nanoarchaeia	Woesearchaeales	Un_Woesearchaeales	Un_Woesearchaeales	Un_Woesearchaeales		0	0	0	0	0	0	0	0	0	0	0	0	0	0	0	0	0	0	36	0	0	0	0	0	0	0	0	20	0	0	0	0	0	0	0	0	0	0	0	0	0
A_ASV02239	Archaea	Nanoarchaeota	Nanoarchaeia	Woesearchaeales	Un_Woesearchaeales	Un_Woesearchaeales	Un_Woesearchaeales		0	0	0	0	0	0	0	0	0	0	0	0	0	0	0	0	15	21	0	0	0	0	0	0	0	0	0	0	0	0	0	20	0	0	0	0	0	0	0	0	0
A_ASV02234	Archaea	Nanoarchaeota	Nanoarchaeia	Woesearchaeales	Un_Woesearchaeales	Un_Woesearchaeales	Un_Woesearchaeales		0	0	0	0	0	0	0	0	0	0	0	0	32	0	10	14	0	0	0	0	0	0	0	0	0	0	0	0	0	0	0	0	0	0	0	0	0	0	0	0	0
A_ASV02258	Archaea	Crenarchaeota	Bathyarchaeia	Un_Bathyarchaeia	Un_Bathyarchaeia	Un_Bathyarchaeia	Un_Bathyarchaeia		0	0	0	0	0	0	55	0	0	0	0	0	0	0	0	0	0	0	0	0	0	0	0	0	0	0	0	0	0	0	0	0	0	0	0	0	0	0	0	0	0
A_ASV02261	Archaea	Crenarchaeota	Bathyarchaeia	Un_Bathyarchaeia	Un_Bathyarchaeia	Un_Bathyarchaeia	Un_Bathyarchaeia		0	0	0	0	0	0	0	55	0	0	0	0	0	0	0	0	0	0	0	0	0	0	0	0	0	0	0	0	0	0	0	0	0	0	0	0	0	0	0	0	0
A_ASV02273	Archaea	Crenarchaeota	Bathyarchaeia	Un_Bathyarchaeia	Un_Bathyarchaeia	Un_Bathyarchaeia	Un_Bathyarchaeia		0	0	0	0	0	0	0	0	0	0	0	0	0	24	0	0	0	0	0	0	0	0	0	0	0	0	0	0	0	0	0	0	0	0	0	0	0	0	0	31	0
A_ASV02287	Archaea	Crenarchaeota	Bathyarchaeia	Un_Bathyarchaeia	Un_Bathyarchaeia	Un_Bathyarchaeia	Un_Bathyarchaeia		0	0	0	0	0	0	0	0	0	0	0	0	0	0	0	0	0	0	0	0	0	0	0	0	0	0	0	0	0	0	0	0	0	55	0	0	0	0	0	0	0
A_ASV02288	Archaea	Crenarchaeota	Bathyarchaeia	Un_Bathyarchaeia	Un_Bathyarchaeia	Un_Bathyarchaeia	Un_Bathyarchaeia		0	0	0	0	0	0	0	0	0	0	0	0	0	0	0	0	0	0	0	0	0	0	0	0	0	0	0	0	0	0	0	0	0	55	0	0	0	0	0	0	0
A_ASV02289	Archaea	Crenarchaeota	Bathyarchaeia	Un_Bathyarchaeia	Un_Bathyarchaeia	Un_Bathyarchaeia	Un_Bathyarchaeia		0	0	0	0	0	0	0	0	0	0	0	0	0	0	0	0	0	0	0	0	0	0	0	0	0	0	0	0	0	0	0	0	0	55	0	0	0	0	0	0	0
A_ASV02290	Archaea	Crenarchaeota	Bathyarchaeia	Un_Bathyarchaeia	Un_Bathyarchaeia	Un_Bathyarchaeia	Un_Bathyarchaeia		0	0	0	0	0	0	0	0	0	0	0	0	0	0	0	0	0	0	0	0	0	0	0	0	0	0	0	0	0	0	0	0	0	0	55	0	0	0	0	0	0
A_ASV02292	Archaea	Crenarchaeota	Bathyarchaeia	Un_Bathyarchaeia	Un_Bathyarchaeia	Un_Bathyarchaeia	Un_Bathyarchaeia		0	0	0	0	0	0	0	0	0	0	0	0	0	0	0	0	0	0	0	0	0	0	0	0	0	0	0	0	0	0	0	0	0	0	0	55	0	0	0	0	0
A_ASV02296	Archaea	Crenarchaeota	Bathyarchaeia	Un_Bathyarchaeia	Un_Bathyarchaeia	Un_Bathyarchaeia	Un_Bathyarchaeia		0	0	0	0	0	0	0	0	0	0	0	0	0	0	0	0	0	0	0	0	0	0	0	0	0	0	0	0	0	0	0	0	0	0	0	0	0	0	0	55	0
A_ASV02297	Archaea	Crenarchaeota	Bathyarchaeia	Un_Bathyarchaeia	Un_Bathyarchaeia	Un_Bathyarchaeia	Un_Bathyarchaeia		0	0	0	0	0	0	0	0	0	0	0	0	0	0	0	0	0	0	0	0	0	0	0	0	0	0	0	0	0	0	0	0	0	0	0	0	0	0	0	0	55
A_ASV02299	Archaea	Crenarchaeota	Bathyarchaeia	Un_Bathyarchaeia	Un_Bathyarchaeia	Un_Bathyarchaeia	Un_Bathyarchaeia		0	0	0	0	0	0	0	0	0	0	0	0	0	0	0	0	0	0	0	0	0	0	0	0	0	0	0	0	0	0	0	0	0	0	0	0	0	0	0	0	0
A_ASV02282	Archaea	Crenarchaeota	Bathyarchaeia	Un_Bathyarchaeia	Un_Bathyarchaeia	Un_Bathyarchaeia	Un_Bathyarchaeia		0	0	0	0	0	0	0	0	0	0	0	0	0	0	0	0	0	0	0	0	0	0	0	0	0	0	0	55	0	0	0	0	0	0	0	0	0	0	0	0	0
A_ASV02264	Archaea	Hydrothermarchaeota	Hydrothermarchaeia	Hydrothermarchaeales	Un_Hydrothermarchaeales	Un_Hydrothermarchaeales	Un_Hydrothermarchaeales		0	0	0	0	0	0	0	0	55	0	0	0	0	0	0	0	0	0	0	0	0	0	0	0	0	0	0	0	0	0	0	0	0	0	0	0	0	0	0	0	0
A_ASV02267	Archaea	Un_Archaea	Un_Archaea	Un_Archaea	Un_Archaea	Un_Archaea	Un_Archaea		0	0	0	0	0	0	0	0	0	24	19	12	0	0	0	0	0	0	0	0	0	0	0	0	0	0	0	0	0	0	0	0	0	0	0	0	0	0	0	0	0
A_ASV02279	Archaea	Un_Archaea	Un_Archaea	Un_Archaea	Un_Archaea	Un_Archaea	Un_Archaea		0	0	0	0	0	0	0	0	0	0	0	0	0	0	0	0	0	0	0	0	0	0	0	0	0	55	0	0	0	0	0	0	0	0	0	0	0	0	0	0	0
A_ASV02285	Archaea	Un_Archaea	Un_Archaea	Un_Archaea	Un_Archaea	Un_Archaea	Un_Archaea		0	0	0	0	0	0	0	0	0	0	0	0	0	0	0	0	0	0	0	0	0	0	0	0	0	0	0	0	0	0	0	0	55	0	0	0	0	0	0	0	0
A_ASV02277	Archaea	Nanoarchaeota	Nanoarchaeia	Woesearchaeales	GW2011_GWC1_47_15	Un_GW2011_GWC1_47_15	Un_GW2011_GWC1_47_15		0	0	0	0	0	0	0	0	0	0	0	0	0	0	0	0	0	0	55	0	0	0	0	0	0	0	0	0	0	0	0	0	0	0	0	0	0	0	0	0	0
A_ASV02275	Archaea	Nanoarchaeota	Nanoarchaeia	Woesearchaeales	Un_Woesearchaeales	Un_Woesearchaeales	Un_Woesearchaeales		0	0	0	0	0	0	0	0	0	0	0	0	0	0	23	0	10	22	0	0	0	0	0	0	0	0	0	0	0	0	0	0	0	0	0	0	0	0	0	0	0
A_ASV02280	Archaea	Nanoarchaeota	Nanoarchaeia	Woesearchaeales	Un_Woesearchaeales	Un_Woesearchaeales	Un_Woesearchaeales		0	0	0	0	0	0	0	0	0	0	0	0	0	0	0	0	0	0	0	0	0	0	0	0	0	0	0	55	0	0	0	0	0	0	0	0	0	0	0	0	0
A_ASV02253	Archaea	Nanoarchaeota	Nanoarchaeia	Woesearchaeales	Un_Woesearchaeales	Un_Woesearchaeales	Un_Woesearchaeales		18	0	0	0	0	0	0	0	0	0	0	0	0	0	9	12	0	0	0	0	0	0	0	0	0	0	0	0	16	0	0	0	0	0	0	0	0	0	0	0	0
A_ASV02263	Archaea	Nanoarchaeota	Nanoarchaeia	Woesearchaeales	Un_Woesearchaeales	Un_Woesearchaeales	Un_Woesearchaeales		0	0	0	0	0	0	0	38	0	0	0	0	0	17	0	0	0	0	0	0	0	0	0	0	0	0	0	0	0	0	0	0	0	0	0	0	0	0	0	0	0
A_ASV02278	Archaea	Nanoarchaeota	Nanoarchaeia	Woesearchaeales	Un_Woesearchaeales	Un_Woesearchaeales	Un_Woesearchaeales		0	0	0	0	0	0	0	0	0	0	0	0	0	0	0	0	0	0	55	0	0	0	0	0	0	0	0	0	0	0	0	0	0	0	0	0	0	0	0	0	0
A_ASV02294	Archaea	Nanoarchaeota	Nanoarchaeia	Woesearchaeales	Un_Woesearchaeales	Un_Woesearchaeales	Un_Woesearchaeales		0	0	0	0	0	0	0	0	0	0	0	0	0	0	0	0	0	0	0	0	0	0	0	0	0	0	0	0	0	0	0	0	0	0	0	0	0	28	27	0	0
A_ASV02274	Archaea	Nanoarchaeota	Nanoarchaeia	Woesearchaeales	Un_Woesearchaeales	Un_Woesearchaeales	Un_Woesearchaeales		0	0	0	0	0	0	0	0	0	0	0	0	0	0	36	0	19	0	0	0	0	0	0	0	0	0	0	0	0	0	0	0	0	0	0	0	0	0	0	0	0
A_ASV02270	Archaea	Thermoplasmatota	Thermoplasmata	Marine Benthic Group D and DHVEG-1	Un_Marine Benthic Group D and DHVEG-1	Un_Marine Benthic Group D and DHVEG-1	Un_Marine Benthic Group D and DHVEG-1		0	0	0	0	0	0	0	0	0	0	0	0	21	0	0	0	0	0	0	0	0	0	0	0	0	0	0	0	0	0	0	0	0	0	0	34	0	0	0	0	0
A_ASV02271	Archaea	Thermoplasmatota	Thermoplasmata	Marine Benthic Group D and DHVEG-1	Un_Marine Benthic Group D and DHVEG-1	Un_Marine Benthic Group D and DHVEG-1	Un_Marine Benthic Group D and DHVEG-1		0	0	0	0	0	0	0	0	0	0	0	0	2	0	0	25	23	0	0	0	0	0	0	0	0	0	0	0	0	5	0	0	0	0	0	0	0	0	0	0	0
A_ASV02295	Archaea	Thermoplasmatota	Thermoplasmata	Un_Thermoplasmata	Un_Thermoplasmata	Un_Thermoplasmata	Un_Thermoplasmata		0	0	0	0	0	0	0	0	0	0	0	0	0	0	0	0	0	0	0	0	0	0	0	0	0	0	0	0	0	0	0	0	0	0	0	0	0	0	55	0	0
A_ASV02314	Archaea	Asgardarchaeota	Un_Asgardarchaeota	Un_Asgardarchaeota	Un_Asgardarchaeota	Un_Asgardarchaeota	Un_Asgardarchaeota		0	0	0	0	0	0	0	0	0	0	0	0	0	0	0	0	0	0	54	0	0	0	0	0	0	0	0	0	0	0	0	0	0	0	0	0	0	0	0	0	0
A_ASV02324	Archaea	Crenarchaeota	Bathyarchaeia	Un_Bathyarchaeia	Un_Bathyarchaeia	Un_Bathyarchaeia	Un_Bathyarchaeia		0	0	0	0	0	0	0	0	0	0	0	0	0	0	0	0	0	0	0	0	0	0	0	0	0	0	0	0	0	0	0	0	0	0	0	0	0	0	0	0	0
A_ASV02309	Archaea	Crenarchaeota	Bathyarchaeia	Un_Bathyarchaeia	Un_Bathyarchaeia	Un_Bathyarchaeia	Un_Bathyarchaeia		0	0	0	0	0	0	0	0	25	0	0	0	0	0	0	0	0	0	0	0	0	0	0	0	0	0	0	0	0	0	0	0	0	29	0	0	0	0	0	0	0
A_ASV02308	Archaea	Crenarchaeota	Bathyarchaeia	Un_Bathyarchaeia	Un_Bathyarchaeia	Un_Bathyarchaeia	Un_Bathyarchaeia		0	0	0	0	0	0	0	0	40	0	0	0	0	0	0	0	0	0	0	0	0	0	0	0	0	0	0	0	0	0	0	0	0	0	0	0	0	0	0	0	0
A_ASV02304	Archaea	Euryarchaeota	Thermococci	Methanofastidiosales	Un_Methanofastidiosales	Un_Methanofastidiosales	Un_Methanofastidiosales		0	0	0	0	0	0	21	0	0	0	0	0	0	0	0	0	0	0	0	0	0	0	0	0	0	0	0	0	0	0	0	0	0	0	0	0	33	0	0	0	0
A_ASV02306	Archaea	Nanoarchaeota	Nanoarchaeia	Woesearchaeales	Un_Woesearchaeales	Un_Woesearchaeales	Un_Woesearchaeales		0	0	0	0	0	0	0	44	0	0	0	0	0	0	0	0	0	0	0	0	0	0	0	0	0	0	0	0	0	0	0	0	0	0	0	0	0	0	0	10	0
A_ASV02322	Archaea	Nanoarchaeota	Nanoarchaeia	Woesearchaeales	Un_Woesearchaeales	Un_Woesearchaeales	Un_Woesearchaeales		0	0	0	0	0	0	0	0	0	0	0	0	0	0	0	0	0	0	0	0	0	0	0	0	0	0	0	0	0	0	0	0	0	0	0	0	0	0	0	54	0
A_ASV02319	Archaea	Nanoarchaeota	Nanoarchaeia	Woesearchaeales	Un_Woesearchaeales	Un_Woesearchaeales	Un_Woesearchaeales		0	0	0	0	0	0	0	0	0	0	0	0	0	0	0	0	0	0	0	0	0	0	0	0	0	0	0	0	0	0	0	0	0	54	0	0	0	0	0	0	0
A_ASV02320	Archaea	Nanoarchaeota	Nanoarchaeia	Woesearchaeales	Un_Woesearchaeales	Un_Woesearchaeales	Un_Woesearchaeales		0	0	0	0	0	0	0	0	0	0	0	0	0	0	0	0	0	0	0	0	0	0	0	0	0	0	0	0	0	0	0	0	0	0	0	0	0	0	0	54	0
A_ASV02311	Archaea	Nanoarchaeota	Nanoarchaeia	Woesearchaeales	Un_Woesearchaeales	Un_Woesearchaeales	Un_Woesearchaeales		0	0	0	0	0	0	0	0	0	0	0	0	26	0	0	0	0	28	0	0	0	0	0	0	0	0	0	0	0	0	0	0	0	0	0	0	0	0	0	0	0
A_ASV02323	Archaea	Thermoplasmatota	Un_Thermoplasmatota	Un_Thermoplasmatota	Un_Thermoplasmatota	Un_Thermoplasmatota	Un_Thermoplasmatota		0	0	0	0	0	0	0	0	0	0	0	0	0	0	0	0	0	0	0	0	0	0	0	0	0	0	0	0	0	0	0	0	0	0	0	0	0	0	0	0	0
A_ASV02300	Archaea	Thermoplasmatota	Thermoplasmata	Marine Benthic Group D and DHVEG-1	Un_Marine Benthic Group D and DHVEG-1	Un_Marine Benthic Group D and DHVEG-1	Un_Marine Benthic Group D and DHVEG-1		19	0	0	0	0	0	0	0	0	0	0	0	26	9	0	0	0	0	0	0	0	0	0	0	0	0	0	0	0	0	0	0	0	0	0	0	0	0	0	0	0
A_ASV02303	Archaea	Thermoplasmatota	Thermoplasmata	Marine Benthic Group D and DHVEG-1	Un_Marine Benthic Group D and DHVEG-1	Un_Marine Benthic Group D and DHVEG-1	Un_Marine Benthic Group D and DHVEG-1		0	0	0	0	0	0	54	0	0	0	0	0	0	0	0	0	0	0	0	0	0	0	0	0	0	0	0	0	0	0	0	0	0	0	0	0	0	0	0	0	0
A_ASV02312	Archaea	Thermoplasmatota	Thermoplasmata	Marine Benthic Group D and DHVEG-1	Un_Marine Benthic Group D and DHVEG-1	Un_Marine Benthic Group D and DHVEG-1	Un_Marine Benthic Group D and DHVEG-1		0	0	0	0	0	0	0	0	0	0	0	0	25	29	0	0	0	0	0	0	0	0	0	0	0	0	0	0	0	0	0	0	0	0	0	0	0	0	0	0	0
A_ASV02317	Archaea	Thermoplasmatota	Thermoplasmata	Marine Benthic Group D and DHVEG-1	Un_Marine Benthic Group D and DHVEG-1	Un_Marine Benthic Group D and DHVEG-1	Un_Marine Benthic Group D and DHVEG-1		0	0	0	0	0	0	0	0	0	0	0	0	0	0	0	0	0	0	0	0	0	0	0	0	0	0	0	0	0	0	0	0	0	54	0	0	0	0	0	0	0
A_ASV02318	Archaea	Thermoplasmatota	Thermoplasmata	Marine Benthic Group D and DHVEG-1	Un_Marine Benthic Group D and DHVEG-1	Un_Marine Benthic Group D and DHVEG-1	Un_Marine Benthic Group D and DHVEG-1		0	0	0	0	0	0	0	0	0	0	0	0	0	0	0	0	0	0	0	0	0	0	0	0	0	0	0	0	0	0	0	0	0	54	0	0	0	0	0	0	0
A_ASV02305	Archaea	Thermoplasmatota	Thermoplasmata	Un_Thermoplasmata	Un_Thermoplasmata	Un_Thermoplasmata	Un_Thermoplasmata		0	0	0	0	0	0	0	54	0	0	0	0	0	0	0	0	0	0	0	0	0	0	0	0	0	0	0	0	0	0	0	0	0	0	0	0	0	0	0	0	0
A_ASV02354	Archaea	Asgardarchaeota	Un_Asgardarchaeota	Un_Asgardarchaeota	Un_Asgardarchaeota	Un_Asgardarchaeota	Un_Asgardarchaeota		0	0	0	0	0	0	0	0	0	0	0	0	0	0	0	0	0	0	0	0	0	0	0	0	0	0	0	0	0	0	0	0	0	0	0	0	0	0	0	35	0
A_ASV02328	Archaea	Crenarchaeota	Bathyarchaeia	Un_Bathyarchaeia	Un_Bathyarchaeia	Un_Bathyarchaeia	Un_Bathyarchaeia		0	0	0	53	0	0	0	0	0	0	0	0	0	0	0	0	0	0	0	0	0	0	0	0	0	0	0	0	0	0	0	0	0	0	0	0	0	0	0	0	0
A_ASV02330	Archaea	Crenarchaeota	Bathyarchaeia	Un_Bathyarchaeia	Un_Bathyarchaeia	Un_Bathyarchaeia	Un_Bathyarchaeia		0	0	0	0	0	0	0	53	0	0	0	0	0	0	0	0	0	0	0	0	0	0	0	0	0	0	0	0	0	0	0	0	0	0	0	0	0	0	0	0	0
A_ASV02344	Archaea	Crenarchaeota	Bathyarchaeia	Un_Bathyarchaeia	Un_Bathyarchaeia	Un_Bathyarchaeia	Un_Bathyarchaeia		0	0	0	0	0	0	0	0	0	0	0	0	0	0	0	0	0	0	0	0	0	0	0	0	0	0	0	0	0	0	53	0	0	0	0	0	0	0	0	0	0
A_ASV02346	Archaea	Crenarchaeota	Bathyarchaeia	Un_Bathyarchaeia	Un_Bathyarchaeia	Un_Bathyarchaeia	Un_Bathyarchaeia		0	0	0	0	0	0	0	0	0	0	0	0	0	0	0	0	0	0	0	0	0	0	0	0	0	0	0	0	0	0	0	0	0	53	0	0	0	0	0	0	0
A_ASV02351	Archaea	Crenarchaeota	Nitrososphaeria	Nitrosopumilales	Nitrosopumilaceae	Un_Nitrosopumilaceae	Un_Nitrosopumilaceae		0	0	0	0	0	0	0	0	0	0	0	0	0	0	0	0	0	0	0	0	0	0	0	0	0	0	0	0	0	0	0	0	0	0	0	0	0	53	0	0	0
A_ASV02357	Archaea	Crenarchaeota	Nitrososphaeria	Nitrosopumilales	Nitrosopumilaceae	Un_Nitrosopumilaceae	Un_Nitrosopumilaceae		0	0	0	0	0	0	0	0	0	0	0	0	0	0	0	0	0	0	0	0	0	0	0	0	0	0	0	0	0	0	0	0	0	0	0	0	0	0	0	0	0
A_ASV02331	Archaea	Un_Archaea	Un_Archaea	Un_Archaea	Un_Archaea	Un_Archaea	Un_Archaea		0	0	0	0	0	0	0	53	0	0	0	0	0	0	0	0	0	0	0	0	0	0	0	0	0	0	0	0	0	0	0	0	0	0	0	0	0	0	0	0	0
A_ASV02332	Archaea	Nanoarchaeota	Nanoarchaeia	Woesearchaeales	Un_Woesearchaeales	Un_Woesearchaeales	Un_Woesearchaeales		0	0	0	0	0	0	0	0	53	0	0	0	0	0	0	0	0	0	0	0	0	0	0	0	0	0	0	0	0	0	0	0	0	0	0	0	0	0	0	0	0
A_ASV02337	Archaea	Nanoarchaeota	Nanoarchaeia	Woesearchaeales	Un_Woesearchaeales	Un_Woesearchaeales	Un_Woesearchaeales		0	0	0	0	0	0	0	0	0	0	0	0	0	0	26	0	0	0	0	0	0	0	0	0	0	0	0	4	0	0	0	0	0	0	0	0	0	23	0	0	0
A_ASV02352	Archaea	Nanoarchaeota	Nanoarchaeia	Woesearchaeales	Un_Woesearchaeales	Un_Woesearchaeales	Un_Woesearchaeales		0	0	0	0	0	0	0	0	0	0	0	0	0	0	0	0	0	0	0	0	0	0	0	0	0	0	0	0	0	0	0	0	0	0	0	0	0	0	29	0	24
A_ASV02338	Archaea	Nanoarchaeota	Nanoarchaeia	Woesearchaeales	Un_Woesearchaeales	Un_Woesearchaeales	Un_Woesearchaeales		0	0	0	0	0	0	0	0	0	0	0	0	0	0	0	0	0	0	53	0	0	0	0	0	0	0	0	0	0	0	0	0	0	0	0	0	0	0	0	0	0
A_ASV02326	Archaea	Nanoarchaeota	Nanoarchaeia	Woesearchaeales	Un_Woesearchaeales	Un_Woesearchaeales	Un_Woesearchaeales		0	53	0	0	0	0	0	0	0	0	0	0	0	0	0	0	0	0	0	0	0	0	0	0	0	0	0	0	0	0	0	0	0	0	0	0	0	0	0	0	0
A_ASV02329	Archaea	Thermoplasmatota	Thermoplasmata	Marine Benthic Group D and DHVEG-1	Un_Marine Benthic Group D and DHVEG-1	Un_Marine Benthic Group D and DHVEG-1	Un_Marine Benthic Group D and DHVEG-1		0	0	0	0	0	53	0	0	0	0	0	0	0	0	0	0	0	0	0	0	0	0	0	0	0	0	0	0	0	0	0	0	0	0	0	0	0	0	0	0	0
A_ASV02353	Archaea	Thermoplasmatota	Thermoplasmata	Un_Thermoplasmata	Un_Thermoplasmata	Un_Thermoplasmata	Un_Thermoplasmata		0	0	0	0	0	0	0	0	0	0	0	0	0	0	0	0	0	0	0	0	0	0	0	0	0	0	0	0	0	0	0	0	0	0	0	0	0	0	0	53	0
A_ASV02387	Archaea	Asgardarchaeota	Lokiarchaeia	Lokiarchaeia	Lokiarchaeia	Lokiarchaeia	Lokiarchaeia		0	0	0	0	0	0	0	0	0	0	0	0	0	0	0	0	0	0	0	0	0	0	0	0	0	0	0	0	0	0	0	0	0	0	0	0	0	0	0	0	0
A_ASV02369	Archaea	Asgardarchaeota	Un_Asgardarchaeota	Un_Asgardarchaeota	Un_Asgardarchaeota	Un_Asgardarchaeota	Un_Asgardarchaeota		0	0	0	0	0	0	0	0	0	0	0	0	0	30	0	0	0	0	0	0	0	0	0	0	0	0	0	0	0	0	0	0	22	0	0	0	0	0	0	0	0
A_ASV02377	Archaea	Crenarchaeota	Bathyarchaeia	Un_Bathyarchaeia	Un_Bathyarchaeia	Un_Bathyarchaeia	Un_Bathyarchaeia		0	0	0	0	0	0	0	0	0	0	0	0	0	0	0	0	0	0	0	0	0	0	0	0	0	0	0	0	0	0	0	0	0	52	0	0	0	0	0	0	0
A_ASV02378	Archaea	Crenarchaeota	Bathyarchaeia	Un_Bathyarchaeia	Un_Bathyarchaeia	Un_Bathyarchaeia	Un_Bathyarchaeia		0	0	0	0	0	0	0	0	0	0	0	0	0	0	0	0	0	0	0	0	0	0	0	0	0	0	0	0	0	0	0	0	0	0	52	0	0	0	0	0	0
A_ASV02383	Archaea	Crenarchaeota	Nitrososphaeria	Nitrosopumilales	Nitrosopumilaceae	Candidatus Nitrosopumilus	Un_Candidatus Nitrosopumilus		0	0	0	0	0	0	0	0	0	0	0	0	0	0	0	0	0	0	0	0	0	0	0	0	0	0	0	0	0	0	0	0	0	0	0	0	0	52	0	0	0
A_ASV02359	Archaea	Nanoarchaeota	Nanoarchaeia	Woesearchaeales	Un_Woesearchaeales	Un_Woesearchaeales	Un_Woesearchaeales		0	0	0	27	0	0	0	0	0	0	0	0	0	0	0	0	0	0	0	0	0	0	0	0	0	0	0	0	0	0	0	25	0	0	0	0	0	0	0	0	0
A_ASV02363	Archaea	Nanoarchaeota	Nanoarchaeia	Woesearchaeales	Un_Woesearchaeales	Un_Woesearchaeales	Un_Woesearchaeales		0	0	0	0	0	15	0	0	0	0	0	0	37	0	0	0	0	0	0	0	0	0	0	0	0	0	0	0	0	0	0	0	0	0	0	0	0	0	0	0	0
A_ASV02367	Archaea	Nanoarchaeota	Nanoarchaeia	Woesearchaeales	Un_Woesearchaeales	Un_Woesearchaeales	Un_Woesearchaeales		0	0	0	0	0	0	0	0	0	0	0	0	45	0	0	0	0	0	0	0	0	0	0	0	0	0	0	7	0	0	0	0	0	0	0	0	0	0	0	0	0
A_ASV02385	Archaea	Nanoarchaeota	Nanoarchaeia	Woesearchaeales	Un_Woesearchaeales	Un_Woesearchaeales	Un_Woesearchaeales		0	0	0	0	0	0	0	0	0	0	0	0	0	0	0	0	0	0	0	0	0	0	0	0	0	0	0	0	0	0	0	0	0	0	0	0	0	0	0	0	0
A_ASV02358	Archaea	Nanoarchaeota	Nanoarchaeia	Woesearchaeales	Un_Woesearchaeales	Un_Woesearchaeales	Un_Woesearchaeales		0	0	30	0	0	0	0	0	0	0	0	0	0	22	0	0	0	0	0	0	0	0	0	0	0	0	0	0	0	0	0	0	0	0	0	0	0	0	0	0	0
A_ASV02371	Archaea	Nanoarchaeota	Nanoarchaeia	Woesearchaeales	Un_Woesearchaeales	Un_Woesearchaeales	Un_Woesearchaeales		0	0	0	0	0	0	0	0	0	0	0	0	0	0	0	0	0	0	52	0	0	0	0	0	0	0	0	0	0	0	0	0	0	0	0	0	0	0	0	0	0
A_ASV02364	Archaea	Thermoplasmatota	Thermoplasmata	Marine Benthic Group D and DHVEG-1	Un_Marine Benthic Group D and DHVEG-1	Un_Marine Benthic Group D and DHVEG-1	Un_Marine Benthic Group D and DHVEG-1		0	0	0	0	0	0	0	52	0	0	0	0	0	0	0	0	0	0	0	0	0	0	0	0	0	0	0	0	0	0	0	0	0	0	0	0	0	0	0	0	0
A_ASV02370	Archaea	Thermoplasmatota	Thermoplasmata	Un_Thermoplasmata	Un_Thermoplasmata	Un_Thermoplasmata	Un_Thermoplasmata		0	0	0	0	0	0	0	0	0	0	0	0	0	0	0	52	0	0	0	0	0	0	0	0	0	0	0	0	0	0	0	0	0	0	0	0	0	0	0	0	0
A_ASV02376	Archaea	Thermoplasmatota	Thermoplasmata	Un_Thermoplasmata	Un_Thermoplasmata	Un_Thermoplasmata	Un_Thermoplasmata		0	0	0	0	0	0	0	0	0	0	0	0	0	0	0	0	0	0	0	0	0	0	0	0	0	0	0	0	0	0	52	0	0	0	0	0	0	0	0	0	0
A_ASV02399	Archaea	Crenarchaeota	Bathyarchaeia	Un_Bathyarchaeia	Un_Bathyarchaeia	Un_Bathyarchaeia	Un_Bathyarchaeia		0	0	0	0	0	0	0	0	0	0	0	0	51	0	0	0	0	0	0	0	0	0	0	0	0	0	0	0	0	0	0	0	0	0	0	0	0	0	0	0	0
A_ASV02401	Archaea	Crenarchaeota	Bathyarchaeia	Un_Bathyarchaeia	Un_Bathyarchaeia	Un_Bathyarchaeia	Un_Bathyarchaeia		0	0	0	0	0	0	0	0	0	0	0	0	0	0	12	0	0	0	0	0	0	0	0	0	0	0	0	0	0	0	0	0	0	22	0	17	0	0	0	0	0
A_ASV02402	Archaea	Crenarchaeota	Bathyarchaeia	Un_Bathyarchaeia	Un_Bathyarchaeia	Un_Bathyarchaeia	Un_Bathyarchaeia		0	0	0	0	0	0	0	0	0	0	0	0	0	0	0	0	0	0	51	0	0	0	0	0	0	0	0	0	0	0	0	0	0	0	0	0	0	0	0	0	0
A_ASV02400	Archaea	Hydrothermarchaeota	Hydrothermarchaeia	Hydrothermarchaeales	Un_Hydrothermarchaeales	Un_Hydrothermarchaeales	Un_Hydrothermarchaeales		0	0	0	0	0	0	0	0	0	0	0	0	39	0	0	0	0	0	0	0	0	0	0	0	0	0	0	12	0	0	0	0	0	0	0	0	0	0	0	0	0
A_ASV02392	Archaea	Un_Archaea	Un_Archaea	Un_Archaea	Un_Archaea	Un_Archaea	Un_Archaea		0	0	0	0	0	0	0	36	15	0	0	0	0	0	0	0	0	0	0	0	0	0	0	0	0	0	0	0	0	0	0	0	0	0	0	0	0	0	0	0	0
A_ASV02412	Archaea	Nanoarchaeota	Nanoarchaeia	Woesearchaeales	Un_Woesearchaeales	Un_Woesearchaeales	Un_Woesearchaeales		0	0	0	0	0	0	0	0	0	0	0	0	0	0	0	0	0	0	0	0	0	0	0	0	0	0	0	0	0	0	0	0	0	0	0	0	0	0	0	0	0
A_ASV02389	Archaea	Nanoarchaeota	Nanoarchaeia	Woesearchaeales	Un_Woesearchaeales	Un_Woesearchaeales	Un_Woesearchaeales		0	0	0	0	21	0	0	30	0	0	0	0	0	0	0	0	0	0	0	0	0	0	0	0	0	0	0	0	0	0	0	0	0	0	0	0	0	0	0	0	0
A_ASV02409	Archaea	Nanoarchaeota	Nanoarchaeia	Woesearchaeales	Un_Woesearchaeales	Un_Woesearchaeales	Un_Woesearchaeales		0	0	0	0	0	0	0	0	0	0	0	0	0	0	0	0	0	0	0	0	0	0	0	0	0	0	0	0	0	0	0	0	0	0	0	0	0	51	0	0	0
A_ASV02410	Archaea	Nanoarchaeota	Nanoarchaeia	Woesearchaeales	Un_Woesearchaeales	Un_Woesearchaeales	Un_Woesearchaeales		0	0	0	0	0	0	0	0	0	0	0	0	0	0	0	0	0	0	0	0	0	0	0	0	0	0	0	0	0	0	0	0	0	0	0	0	0	30	21	0	0
A_ASV02411	Archaea	Nanoarchaeota	Nanoarchaeia	Woesearchaeales	Un_Woesearchaeales	Un_Woesearchaeales	Un_Woesearchaeales		0	0	0	0	0	0	0	0	0	0	0	0	0	0	0	0	0	0	0	0	0	0	0	0	0	0	0	0	0	0	0	0	0	0	0	0	0	0	0	51	0
A_ASV02398	Archaea	Nanoarchaeota	Nanoarchaeia	Woesearchaeales	Un_Woesearchaeales	Un_Woesearchaeales	Un_Woesearchaeales		0	0	0	0	0	0	0	0	0	0	0	8	0	30	13	0	0	0	0	0	0	0	0	0	0	0	0	0	0	0	0	0	0	0	0	0	0	0	0	0	0
A_ASV02446	Archaea	Asgardarchaeota	Lokiarchaeia	Lokiarchaeia	Lokiarchaeia	Lokiarchaeia	Lokiarchaeia		0	0	0	0	0	0	0	0	0	0	0	0	0	0	0	0	0	0	0	0	0	0	0	0	0	0	0	0	0	0	0	0	0	0	0	0	0	0	0	0	0
A_ASV02427	Archaea	Asgardarchaeota	Odinarchaeia	Un_Odinarchaeia	Un_Odinarchaeia	Un_Odinarchaeia	Un_Odinarchaeia		0	0	0	0	0	0	0	0	0	0	50	0	0	0	0	0	0	0	0	0	0	0	0	0	0	0	0	0	0	0	0	0	0	0	0	0	0	0	0	0	0
A_ASV02421	Archaea	Crenarchaeota	Bathyarchaeia	Un_Bathyarchaeia	Un_Bathyarchaeia	Un_Bathyarchaeia	Un_Bathyarchaeia		0	0	0	0	0	0	21	0	0	0	0	0	0	0	0	13	0	0	0	0	0	0	0	0	0	0	0	0	0	0	0	0	0	0	0	0	0	0	0	0	0
A_ASV02424	Archaea	Crenarchaeota	Bathyarchaeia	Un_Bathyarchaeia	Un_Bathyarchaeia	Un_Bathyarchaeia	Un_Bathyarchaeia		0	0	0	0	0	0	0	0	50	0	0	0	0	0	0	0	0	0	0	0	0	0	0	0	0	0	0	0	0	0	0	0	0	0	0	0	0	0	0	0	0
A_ASV02438	Archaea	Crenarchaeota	Bathyarchaeia	Un_Bathyarchaeia	Un_Bathyarchaeia	Un_Bathyarchaeia	Un_Bathyarchaeia		0	0	0	0	0	0	0	0	0	0	0	0	0	0	0	0	0	0	0	0	0	0	0	0	0	0	0	0	0	0	0	0	0	0	0	50	0	0	0	0	0
A_ASV02439	Archaea	Crenarchaeota	Bathyarchaeia	Un_Bathyarchaeia	Un_Bathyarchaeia	Un_Bathyarchaeia	Un_Bathyarchaeia		0	0	0	0	0	0	0	0	0	0	0	0	0	0	0	0	0	0	0	0	0	0	0	0	0	0	0	0	0	0	0	0	0	0	0	50	0	0	0	0	0
A_ASV02444	Archaea	Crenarchaeota	Bathyarchaeia	Un_Bathyarchaeia	Un_Bathyarchaeia	Un_Bathyarchaeia	Un_Bathyarchaeia		0	0	0	0	0	0	0	0	0	0	0	0	0	0	0	0	0	0	0	0	0	0	0	0	0	0	0	0	0	0	0	0	0	0	0	0	0	0	0	50	0
A_ASV02436	Archaea	Crenarchaeota	Bathyarchaeia	Un_Bathyarchaeia	Un_Bathyarchaeia	Un_Bathyarchaeia	Un_Bathyarchaeia		0	0	0	0	0	0	0	0	0	0	0	0	0	0	0	0	0	0	0	0	0	0	0	0	0	0	0	0	0	0	0	0	0	0	50	0	0	0	0	0	0
A_ASV02422	Archaea	Crenarchaeota	Nitrososphaeria	Caldiarchaeales	Geothermarchaeaceae	Un_Geothermarchaeaceae	Un_Geothermarchaeaceae		0	0	0	0	0	0	0	50	0	0	0	0	0	0	0	0	0	0	0	0	0	0	0	0	0	0	0	0	0	0	0	0	0	0	0	0	0	0	0	0	0
A_ASV02430	Archaea	Crenarchaeota	Nitrososphaeria	Nitrosopumilales	Nitrosopumilaceae	Un_Nitrosopumilaceae	Un_Nitrosopumilaceae		0	0	0	0	0	0	0	0	0	0	0	0	0	0	0	0	0	0	0	50	0	0	0	0	0	0	0	0	0	0	0	0	0	0	0	0	0	0	0	0	0
A_ASV02434	Archaea	Halobacterota	Methanomicrobia	Methanomicrobiales	Methanomicrobiaceae	SDB	Un_SDB		0	0	0	0	0	0	0	0	0	0	0	0	0	0	0	0	0	0	0	0	0	0	0	0	0	0	0	0	0	0	50	0	0	0	0	0	0	0	0	0	0
A_ASV02414	Archaea	Un_Archaea	Un_Archaea	Un_Archaea	Un_Archaea	Un_Archaea	Un_Archaea		24	0	0	0	0	0	0	0	0	0	0	0	0	0	0	0	0	0	0	0	0	0	0	0	0	0	0	0	0	0	0	0	26	0	0	0	0	0	0	0	0
A_ASV02420	Archaea	Nanoarchaeota	Nanoarchaeia	Woesearchaeales	Un_Woesearchaeales	Un_Woesearchaeales	Un_Woesearchaeales		0	0	0	0	0	0	24	0	0	0	0	0	0	0	0	0	0	0	0	0	0	0	0	0	0	0	0	0	0	0	0	0	0	0	0	0	0	0	0	0	26
A_ASV02413	Archaea	Nanoarchaeota	Nanoarchaeia	Woesearchaeales	Un_Woesearchaeales	Un_Woesearchaeales	Un_Woesearchaeales		39	11	0	0	0	0	0	0	0	0	0	0	0	0	0	0	0	0	0	0	0	0	0	0	0	0	0	0	0	0	0	0	0	0	0	0	0	0	0	0	0
A_ASV02423	Archaea	Nanoarchaeota	Nanoarchaeia	Woesearchaeales	Un_Woesearchaeales	Un_Woesearchaeales	Un_Woesearchaeales		0	0	0	0	0	0	0	24	0	0	0	0	0	0	26	0	0	0	0	0	0	0	0	0	0	0	0	0	0	0	0	0	0	0	0	0	0	0	0	0	0
A_ASV02425	Archaea	Nanoarchaeota	Nanoarchaeia	Woesearchaeales	Un_Woesearchaeales	Un_Woesearchaeales	Un_Woesearchaeales		0	0	0	0	0	0	0	0	0	50	0	0	0	0	0	0	0	0	0	0	0	0	0	0	0	0	0	0	0	0	0	0	0	0	0	0	0	0	0	0	0
A_ASV02426	Archaea	Nanoarchaeota	Nanoarchaeia	Woesearchaeales	Un_Woesearchaeales	Un_Woesearchaeales	Un_Woesearchaeales		0	0	0	0	0	0	0	0	0	0	50	0	0	0	0	0	0	0	0	0	0	0	0	0	0	0	0	0	0	0	0	0	0	0	0	0	0	0	0	0	0
A_ASV02428	Archaea	Nanoarchaeota	Nanoarchaeia	Woesearchaeales	Un_Woesearchaeales	Un_Woesearchaeales	Un_Woesearchaeales		0	0	0	0	0	0	0	0	0	0	0	0	0	0	21	0	0	0	0	0	0	0	0	0	0	0	0	0	0	29	0	0	0	0	0	0	0	0	0	0	0
A_ASV02429	Archaea	Nanoarchaeota	Nanoarchaeia	Woesearchaeales	Un_Woesearchaeales	Un_Woesearchaeales	Un_Woesearchaeales		0	0	0	0	0	0	0	0	0	0	0	0	0	0	0	0	0	0	50	0	0	0	0	0	0	0	0	0	0	0	0	0	0	0	0	0	0	0	0	0	0
A_ASV02440	Archaea	Nanoarchaeota	Nanoarchaeia	Woesearchaeales	Un_Woesearchaeales	Un_Woesearchaeales	Un_Woesearchaeales		0	0	0	0	0	0	0	0	0	0	0	0	0	0	0	0	0	0	0	0	0	0	0	0	0	0	0	0	0	0	0	0	0	0	0	0	20	17	13	0	0
A_ASV02456	Archaea	Aenigmarchaeota	Deep Sea Euryarchaeotic Group(DSEG)	Un_Deep Sea Euryarchaeotic Group(DSEG)	Un_Deep Sea Euryarchaeotic Group(DSEG)	Un_Deep Sea Euryarchaeotic Group(DSEG)	Un_Deep Sea Euryarchaeotic Group(DSEG)		0	0	0	0	0	0	0	49	0	0	0	0	0	0	0	0	0	0	0	0	0	0	0	0	0	0	0	0	0	0	0	0	0	0	0	0	0	0	0	0	0
A_ASV02466	Archaea	Aenigmarchaeota	Deep Sea Euryarchaeotic Group(DSEG)	Un_Deep Sea Euryarchaeotic Group(DSEG)	Un_Deep Sea Euryarchaeotic Group(DSEG)	Un_Deep Sea Euryarchaeotic Group(DSEG)	Un_Deep Sea Euryarchaeotic Group(DSEG)		0	0	0	0	0	0	0	0	0	0	0	0	0	0	0	0	0	16	33	0	0	0	0	0	0	0	0	0	0	0	0	0	0	0	0	0	0	0	0	0	0
A_ASV02458	Archaea	Crenarchaeota	Bathyarchaeia	Un_Bathyarchaeia	Un_Bathyarchaeia	Un_Bathyarchaeia	Un_Bathyarchaeia		0	0	0	0	0	0	0	0	28	0	21	0	0	0	0	0	0	0	0	0	0	0	0	0	0	0	0	0	0	0	0	0	0	0	0	0	0	0	0	0	0
A_ASV02481	Archaea	Un_Archaea	Un_Archaea	Un_Archaea	Un_Archaea	Un_Archaea	Un_Archaea		0	0	0	0	0	0	0	0	0	0	0	0	0	0	0	0	0	0	0	0	0	0	0	0	0	0	0	0	0	0	0	0	0	0	0	0	0	0	0	0	0
A_ASV02453	Archaea	Nanoarchaeota	Nanoarchaeia	Woesearchaeales	Un_Woesearchaeales	Un_Woesearchaeales	Un_Woesearchaeales		0	0	0	0	49	0	0	0	0	0	0	0	0	0	0	0	0	0	0	0	0	0	0	0	0	0	0	0	0	0	0	0	0	0	0	0	0	0	0	0	0
A_ASV02465	Archaea	Nanoarchaeota	Nanoarchaeia	Woesearchaeales	Un_Woesearchaeales	Un_Woesearchaeales	Un_Woesearchaeales		0	0	0	0	0	0	0	0	0	0	0	0	0	0	0	0	49	0	0	0	0	0	0	0	0	0	0	0	0	0	0	0	0	0	0	0	0	0	0	0	0
A_ASV02477	Archaea	Nanoarchaeota	Nanoarchaeia	Woesearchaeales	Un_Woesearchaeales	Un_Woesearchaeales	Un_Woesearchaeales		0	0	0	0	0	0	0	0	0	0	0	0	0	0	0	0	0	0	0	0	0	0	0	0	0	0	0	0	0	0	0	0	0	0	0	0	0	0	0	49	0
A_ASV02463	Archaea	Nanoarchaeota	Nanoarchaeia	Woesearchaeales	Un_Woesearchaeales	Un_Woesearchaeales	Un_Woesearchaeales		0	0	0	0	0	0	0	0	0	0	0	0	49	0	0	0	0	0	0	0	0	0	0	0	0	0	0	0	0	0	0	0	0	0	0	0	0	0	0	0	0
A_ASV02467	Archaea	Nanoarchaeota	Nanoarchaeia	Woesearchaeales	Un_Woesearchaeales	Un_Woesearchaeales	Un_Woesearchaeales		0	0	0	0	0	0	0	0	0	0	0	0	0	0	0	0	0	0	49	0	0	0	0	0	0	0	0	0	0	0	0	0	0	0	0	0	0	0	0	0	0
A_ASV02452	Archaea	Nanoarchaeota	Nanoarchaeia	Woesearchaeales	Un_Woesearchaeales	Un_Woesearchaeales	Un_Woesearchaeales		31	0	0	0	18	0	0	0	0	0	0	0	0	0	0	0	0	0	0	0	0	0	0	0	0	0	0	0	0	0	0	0	0	0	0	0	0	0	0	0	0
A_ASV02468	Archaea	Nanoarchaeota	Nanoarchaeia	Woesearchaeales	Un_Woesearchaeales	Un_Woesearchaeales	Un_Woesearchaeales		0	0	0	0	0	0	0	0	0	0	0	0	0	0	0	0	0	0	49	0	0	0	0	0	0	0	0	0	0	0	0	0	0	0	0	0	0	0	0	0	0
A_ASV02454	Archaea	Thermoplasmatota	Thermoplasmata	Marine Benthic Group D and DHVEG-1	Un_Marine Benthic Group D and DHVEG-1	Un_Marine Benthic Group D and DHVEG-1	Un_Marine Benthic Group D and DHVEG-1		0	0	0	0	0	0	49	0	0	0	0	0	0	0	0	0	0	0	0	0	0	0	0	0	0	0	0	0	0	0	0	0	0	0	0	0	0	0	0	0	0
A_ASV02457	Archaea	Thermoplasmatota	Thermoplasmata	Marine Benthic Group D and DHVEG-1	Un_Marine Benthic Group D and DHVEG-1	Un_Marine Benthic Group D and DHVEG-1	Un_Marine Benthic Group D and DHVEG-1		0	0	0	0	0	0	0	0	49	0	0	0	0	0	0	0	0	0	0	0	0	0	0	0	0	0	0	0	0	0	0	0	0	0	0	0	0	0	0	0	0
A_ASV02459	Archaea	Thermoplasmatota	Thermoplasmata	Marine Benthic Group D and DHVEG-1	Un_Marine Benthic Group D and DHVEG-1	Un_Marine Benthic Group D and DHVEG-1	Un_Marine Benthic Group D and DHVEG-1		0	0	0	0	0	0	0	0	18	0	0	31	0	0	0	0	0	0	0	0	0	0	0	0	0	0	0	0	0	0	0	0	0	0	0	0	0	0	0	0	0
A_ASV02480	Archaea	Thermoplasmatota	Thermoplasmata	Marine Benthic Group D and DHVEG-1	Un_Marine Benthic Group D and DHVEG-1	Un_Marine Benthic Group D and DHVEG-1	Un_Marine Benthic Group D and DHVEG-1		0	0	0	0	0	0	0	0	0	0	0	0	0	0	0	0	0	0	0	0	0	0	0	0	0	0	0	0	0	0	0	0	0	0	0	0	0	0	0	0	0
A_ASV02478	Archaea	Thermoplasmatota	Thermoplasmata	Un_Thermoplasmata	Un_Thermoplasmata	Un_Thermoplasmata	Un_Thermoplasmata		0	0	0	0	0	0	0	0	0	0	0	0	0	0	0	0	0	0	0	0	0	0	0	0	0	0	0	0	0	0	0	0	0	0	0	0	0	0	0	49	0
A_ASV02487	Archaea	Crenarchaeota	Bathyarchaeia	Un_Bathyarchaeia	Un_Bathyarchaeia	Un_Bathyarchaeia	Un_Bathyarchaeia		0	0	0	0	0	0	10	15	0	0	0	0	11	0	8	0	0	0	0	0	0	0	0	0	0	0	0	0	0	0	0	4	0	0	0	0	0	0	0	0	0
A_ASV02494	Archaea	Crenarchaeota	Bathyarchaeia	Un_Bathyarchaeia	Un_Bathyarchaeia	Un_Bathyarchaeia	Un_Bathyarchaeia		0	0	0	0	0	0	0	0	0	0	0	0	0	0	48	0	0	0	0	0	0	0	0	0	0	0	0	0	0	0	0	0	0	0	0	0	0	0	0	0	0
A_ASV02495	Archaea	Crenarchaeota	Bathyarchaeia	Un_Bathyarchaeia	Un_Bathyarchaeia	Un_Bathyarchaeia	Un_Bathyarchaeia		0	0	0	0	0	0	0	0	0	0	0	0	0	0	0	0	0	28	0	0	0	0	0	0	0	0	0	0	0	0	0	0	0	0	0	0	0	0	0	0	0
A_ASV02496	Archaea	Crenarchaeota	Bathyarchaeia	Un_Bathyarchaeia	Un_Bathyarchaeia	Un_Bathyarchaeia	Un_Bathyarchaeia		0	0	0	0	0	0	0	0	0	0	0	0	0	0	0	0	0	0	48	0	0	0	0	0	0	0	0	0	0	0	0	0	0	0	0	0	0	0	0	0	0
A_ASV02504	Archaea	Crenarchaeota	Bathyarchaeia	Un_Bathyarchaeia	Un_Bathyarchaeia	Un_Bathyarchaeia	Un_Bathyarchaeia		0	0	0	0	0	0	0	0	0	0	0	0	0	0	0	0	0	0	0	0	0	0	0	0	0	0	0	0	0	0	0	0	0	0	0	48	0	0	0	0	0
A_ASV02509	Archaea	Crenarchaeota	Bathyarchaeia	Un_Bathyarchaeia	Un_Bathyarchaeia	Un_Bathyarchaeia	Un_Bathyarchaeia		0	0	0	0	0	0	0	0	0	0	0	0	0	0	0	0	0	0	0	0	0	0	0	0	0	0	0	0	0	0	0	0	0	0	0	0	0	0	0	0	48
A_ASV02500	Archaea	Crenarchaeota	Nitrososphaeria	Nitrososphaerales	Nitrososphaeraceae	Un_Nitrososphaeraceae	Un_Nitrososphaeraceae		0	0	0	0	0	0	0	0	0	0	0	0	0	0	0	0	0	0	0	0	0	0	0	0	0	0	0	0	0	48	0	0	0	0	0	0	0	0	0	0	0
A_ASV02484	Archaea	Hydrothermarchaeota	Hydrothermarchaeia	Hydrothermarchaeales	Un_Hydrothermarchaeales	Un_Hydrothermarchaeales	Un_Hydrothermarchaeales		0	0	48	0	0	0	0	0	0	0	0	0	0	0	0	0	0	0	0	0	0	0	0	0	0	0	0	0	0	0	0	0	0	0	0	0	0	0	0	0	0
A_ASV02510	Archaea	Un_Archaea	Un_Archaea	Un_Archaea	Un_Archaea	Un_Archaea	Un_Archaea		0	0	0	0	0	0	0	0	0	0	0	0	0	0	0	0	0	0	0	0	0	0	0	0	0	0	0	0	0	0	0	0	0	0	0	0	0	0	0	0	0
A_ASV02485	Archaea	Nanoarchaeota	Nanoarchaeia	Woesearchaeales	Un_Woesearchaeales	Un_Woesearchaeales	Un_Woesearchaeales		0	0	41	0	0	7	0	0	0	0	0	0	0	0	0	0	0	0	0	0	0	0	0	0	0	0	0	0	0	0	0	0	0	0	0	0	0	0	0	0	0
A_ASV02502	Archaea	Nanoarchaeota	Nanoarchaeia	Woesearchaeales	Un_Woesearchaeales	Un_Woesearchaeales	Un_Woesearchaeales		0	0	0	0	0	0	0	0	0	0	0	0	0	0	0	0	0	0	0	0	0	0	0	0	0	0	0	0	0	0	0	31	17	0	0	0	0	0	0	0	0
A_ASV02507	Archaea	Nanoarchaeota	Nanoarchaeia	Woesearchaeales	Un_Woesearchaeales	Un_Woesearchaeales	Un_Woesearchaeales		0	0	0	0	0	0	0	0	0	0	0	0	0	0	0	0	0	0	0	0	0	0	0	0	0	0	0	0	0	0	0	0	0	0	0	0	0	48	0	0	0
A_ASV02516	Archaea	Nanoarchaeota	Nanoarchaeia	Woesearchaeales	Un_Woesearchaeales	Un_Woesearchaeales	Un_Woesearchaeales		0	0	0	0	0	0	0	0	0	0	0	0	0	0	0	0	0	0	0	0	0	0	0	0	0	0	0	0	0	0	0	0	0	0	0	0	0	0	0	0	0
A_ASV02508	Archaea	Thermoplasmatota	Un_Thermoplasmatota	Un_Thermoplasmatota	Un_Thermoplasmatota	Un_Thermoplasmatota	Un_Thermoplasmatota		0	0	0	0	0	0	0	0	0	0	0	0	0	0	0	0	0	0	0	0	0	0	0	0	0	0	0	0	0	0	0	0	0	0	0	0	0	0	0	48	0
A_ASV02517	Archaea	Thermoplasmatota	Thermoplasmata	Marine Benthic Group D and DHVEG-1	Un_Marine Benthic Group D and DHVEG-1	Un_Marine Benthic Group D and DHVEG-1	Un_Marine Benthic Group D and DHVEG-1		0	0	0	0	0	0	0	0	0	0	0	0	0	0	0	0	0	0	0	0	0	0	0	0	0	0	0	0	0	0	0	0	0	0	0	0	0	0	0	0	0
A_ASV02489	Archaea	Thermoplasmatota	Thermoplasmata	Un_Thermoplasmata	Un_Thermoplasmata	Un_Thermoplasmata	Un_Thermoplasmata		0	0	0	0	0	0	0	48	0	0	0	0	0	0	0	0	0	0	0	0	0	0	0	0	0	0	0	0	0	0	0	0	0	0	0	0	0	0	0	0	0
A_ASV02527	Archaea	Asgardarchaeota	Odinarchaeia	Un_Odinarchaeia	Un_Odinarchaeia	Un_Odinarchaeia	Un_Odinarchaeia		0	0	0	0	0	0	0	47	0	0	0	0	0	0	0	0	0	0	0	0	0	0	0	0	0	0	0	0	0	0	0	0	0	0	0	0	0	0	0	0	0
A_ASV02545	Archaea	Crenarchaeota	Bathyarchaeia	Un_Bathyarchaeia	Un_Bathyarchaeia	Un_Bathyarchaeia	Un_Bathyarchaeia		0	0	0	0	0	0	0	0	0	0	0	0	0	0	0	0	0	0	0	0	0	0	0	0	0	0	47	0	0	0	0	0	0	0	0	0	0	0	0	0	0
A_ASV02549	Archaea	Crenarchaeota	Bathyarchaeia	Un_Bathyarchaeia	Un_Bathyarchaeia	Un_Bathyarchaeia	Un_Bathyarchaeia		0	0	0	0	0	0	0	0	0	0	0	0	0	0	0	0	0	0	0	0	0	0	0	0	0	0	0	0	0	0	0	0	0	47	0	0	0	0	0	0	0
A_ASV02557	Archaea	Crenarchaeota	Bathyarchaeia	Un_Bathyarchaeia	Un_Bathyarchaeia	Un_Bathyarchaeia	Un_Bathyarchaeia		0	0	0	0	0	0	0	0	0	0	0	0	0	0	0	0	0	0	0	0	0	0	0	0	0	0	0	0	0	0	0	0	0	0	0	0	0	0	0	47	0
A_ASV02531	Archaea	Crenarchaeota	Nitrososphaeria	Marine Benthic Group A	Un_Marine Benthic Group A	Un_Marine Benthic Group A	Un_Marine Benthic Group A		0	0	0	0	0	0	0	0	24	0	0	0	0	0	0	0	0	0	0	0	0	0	0	0	0	0	0	0	0	0	0	0	0	0	0	0	0	0	0	0	0
A_ASV02536	Archaea	Halobacterota	Methanosarcinia	Methanosarciniales	Methanosarcinaceae	Methanosarcina	Un_Methanosarcina		0	0	0	0	0	0	0	0	0	0	0	0	47	0	0	0	0	0	0	0	0	0	0	0	0	0	0	0	0	0	0	0	0	0	0	0	0	0	0	0	0
A_ASV02520	Archaea	Hydrothermarchaeota	Hydrothermarchaeia	Hydrothermarchaeales	Un_Hydrothermarchaeales	Un_Hydrothermarchaeales	Un_Hydrothermarchaeales		4	0	0	0	0	0	0	0	0	0	0	0	0	0	0	0	0	0	43	0	0	0	0	0	0	0	0	0	0	0	0	0	0	0	0	0	0	0	0	0	0
A_ASV02538	Archaea	Micrarchaeota	Micrarchaeia	Micrarchaeales	Un_Micrarchaeales	Un_Micrarchaeales	Un_Micrarchaeales		0	0	0	0	0	0	0	0	0	0	0	0	0	0	0	0	47	0	0	0	0	0	0	0	0	0	0	0	0	0	0	0	0	0	0	0	0	0	0	0	0
A_ASV02547	Archaea	Un_Archaea	Un_Archaea	Un_Archaea	Un_Archaea	Un_Archaea	Un_Archaea		0	0	0	0	0	0	0	0	0	0	0	0	0	0	0	0	0	0	0	0	0	0	0	0	0	0	0	0	41	0	0	0	0	6	0	0	0	0	0	0	0
A_ASV02526	Archaea	Nanoarchaeota	Nanoarchaeia	Woesearchaeales	Un_Woesearchaeales	Un_Woesearchaeales	Un_Woesearchaeales		0	0	0	0	0	0	14	0	0	0	0	0	25	0	0	8	0	0	0	0	0	0	0	0	0	0	0	0	0	0	0	0	0	0	0	0	0	0	0	0	0
A_ASV02546	Archaea	Nanoarchaeota	Nanoarchaeia	Woesearchaeales	Un_Woesearchaeales	Un_Woesearchaeales	Un_Woesearchaeales		0	0	0	0	0	0	0	0	0	0	0	0	0	0	0	0	0	0	0	0	0	0	0	0	0	0	0	0	47	0	0	0	0	0	0	0	0	0	0	0	0
A_ASV02522	Archaea	Nanoarchaeota	Nanoarchaeia	Woesearchaeales	Un_Woesearchaeales	Un_Woesearchaeales	Un_Woesearchaeales		0	0	25	0	0	0	0	0	0	0	0	0	0	0	0	0	0	0	0	0	0	0	0	0	0	0	0	0	0	0	0	0	0	0	0	0	22	0	0	0	0
A_ASV02524	Archaea	Nanoarchaeota	Nanoarchaeia	Woesearchaeales	Un_Woesearchaeales	Un_Woesearchaeales	Un_Woesearchaeales		0	0	0	0	0	16	0	0	0	0	0	31	0	0	0	0	0	0	0	0	0	0	0	0	0	0	0	0	0	0	0	0	0	0	0	0	0	0	0	0	0
A_ASV02530	Archaea	Nanoarchaeota	Nanoarchaeia	Woesearchaeales	Un_Woesearchaeales	Un_Woesearchaeales	Un_Woesearchaeales		0	0	0	0	0	0	0	0	47	0	0	0	0	0	0	0	0	0	0	0	0	0	0	0	0	0	0	0	0	0	0	0	0	0	0	0	0	0	0	0	0
A_ASV02532	Archaea	Nanoarchaeota	Nanoarchaeia	Woesearchaeales	Un_Woesearchaeales	Un_Woesearchaeales	Un_Woesearchaeales		0	0	0	0	0	0	0	0	0	20	27	0	0	0	0	0	0	0	0	0	0	0	0	0	0	0	0	0	0	0	0	0	0	0	0	0	0	0	0	0	0
A_ASV02554	Archaea	Nanoarchaeota	Nanoarchaeia	Woesearchaeales	Un_Woesearchaeales	Un_Woesearchaeales	Un_Woesearchaeales		0	0	0	0	0	0	0	0	0	0	0	0	0	0	0	0	0	0	0	0	0	0	0	0	0	0	0	0	0	0	0	0	0	0	0	0	0	28	19	0	0
A_ASV02553	Archaea	Nanoarchaeota	Nanoarchaeia	Woesearchaeales	Un_Woesearchaeales	Un_Woesearchaeales	Un_Woesearchaeales		0	0	0	0	0	0	0	0	0	0	0	0	0	0	0	0	0	0	0	0	0	0	0	0	0	0	0	0	0	0	0	0	0	0	0	0	0	47	0	0	0
A_ASV02528	Archaea	Thermoplasmatota	Thermoplasmata	Marine Benthic Group D and DHVEG-1	Un_Marine Benthic Group D and DHVEG-1	Un_Marine Benthic Group D and DHVEG-1	Un_Marine Benthic Group D and DHVEG-1		0	0	0	0	0	0	0	47	0	0	0	0	0	0	0	0	0	0	0	0	0	0	0	0	0	0	0	0	0	0	0	0	0	0	0	0	0	0	0	0	0
A_ASV02548	Archaea	Thermoplasmatota	Thermoplasmata	Marine Benthic Group D and DHVEG-1	Un_Marine Benthic Group D and DHVEG-1	Un_Marine Benthic Group D and DHVEG-1	Un_Marine Benthic Group D and DHVEG-1		0	0	0	0	0	0	0	0	0	0	0	0	0	0	0	0	0	0	0	0	0	0	0	0	0	0	0	0	0	0	0	0	0	47	0	0	0	0	0	0	0
A_ASV02519	Archaea	Thermoplasmatota	Thermoplasmata	Un_Thermoplasmata	Un_Thermoplasmata	Un_Thermoplasmata	Un_Thermoplasmata		12	0	0	0	0	0	0	0	0	0	0	0	0	0	0	0	0	0	0	0	0	0	0	0	0	0	0	0	0	0	0	0	0	0	0	0	0	0	0	0	35
A_ASV02571	Archaea	Aenigmarchaeota	Aenigmarchaeia	Aenigmarchaeales	Un_Aenigmarchaeales	Un_Aenigmarchaeales	Un_Aenigmarchaeales		0	0	0	0	0	0	0	0	0	0	2	0	0	0	0	0	0	0	44	0	0	0	0	0	0	0	0	0	0	0	0	0	0	0	0	0	0	0	0	0	0
A_ASV02569	Archaea	Asgardarchaeota	Lokiarchaeia	Lokiarchaeia	Lokiarchaeia	Lokiarchaeia	Lokiarchaeia		0	0	0	0	0	0	0	0	0	16	0	0	0	13	0	0	0	0	17	0	0	0	0	0	0	0	0	0	0	0	0	0	0	0	0	0	0	0	0	0	0
A_ASV02581	Archaea	Asgardarchaeota	Odinarchaeia	Un_Odinarchaeia	Un_Odinarchaeia	Un_Odinarchaeia	Un_Odinarchaeia		0	0	0	0	0	0	0	0	0	0	0	0	0	0	0	0	0	0	0	0	0	0	0	0	0	0	46	0	0	0	0	0	0	0	0	0	0	0	0	0	0
A_ASV02588	Archaea	Crenarchaeota	Bathyarchaeia	Un_Bathyarchaeia	Un_Bathyarchaeia	Un_Bathyarchaeia	Un_Bathyarchaeia		0	0	0	0	0	0	0	0	0	0	0	0	0	0	0	0	0	0	0	0	0	0	0	0	0	0	0	0	0	0	0	0	0	0	46	0	0	0	0	0	0
A_ASV02595	Archaea	Crenarchaeota	Bathyarchaeia	Un_Bathyarchaeia	Un_Bathyarchaeia	Un_Bathyarchaeia	Un_Bathyarchaeia		0	0	0	0	0	0	0	0	0	0	0	0	0	0	0	0	0	0	0	0	0	0	0	0	0	0	0	0	0	0	0	0	0	0	0	0	0	0	0	0	0
A_ASV02562	Archaea	Hydrothermarchaeota	Hydrothermarchaeia	Hydrothermarchaeales	Un_Hydrothermarchaeales	Un_Hydrothermarchaeales	Un_Hydrothermarchaeales		0	0	0	0	0	0	0	46	0	0	0	0	0	0	0	0	0	0	0	0	0	0	0	0	0	0	0	0	0	0	0	0	0	0	0	0	0	0	0	0	0
A_ASV02566	Archaea	Un_Archaea	Un_Archaea	Un_Archaea	Un_Archaea	Un_Archaea	Un_Archaea		0	0	0	0	0	0	0	0	46	0	0	0	0	0	0	0	0	0	0	0	0	0	0	0	0	0	0	0	0	0	0	0	0	0	0	0	0	0	0	0	0
A_ASV02584	Archaea	Un_Archaea	Un_Archaea	Un_Archaea	Un_Archaea	Un_Archaea	Un_Archaea		0	0	0	0	0	0	0	0	0	0	0	0	0	0	0	0	0	0	0	0	0	0	0	0	0	0	0	0	24	0	0	0	0	0	0	0	0	0	0	0	0
A_ASV02590	Archaea	Nanoarchaeota	Nanoarchaeia	Woesearchaeales	GW2011	AR15	Un_AR15		0	0	0	0	0	0	0	0	0	0	0	0	0	0	0	0	0	0	0	0	0	0	0	0	0	0	0	0	0	0	0	0	0	0	42	4	0	0	0	0	0
A_ASV02592	Archaea	Nanoarchaeota	Nanoarchaeia	Woesearchaeales	Un_Woesearchaeales	Un_Woesearchaeales	Un_Woesearchaeales		0	0	0	0	0	0	0	0	0	0	0	0	0	0	0	0	0	0	0	0	0	0	0	0	0	0	0	0	0	0	0	0	0	0	0	0	0	0	0	46	0
A_ASV02561	Archaea	Nanoarchaeota	Nanoarchaeia	Woesearchaeales	Un_Woesearchaeales	Un_Woesearchaeales	Un_Woesearchaeales		0	0	46	0	0	0	0	0	0	0	0	0	0	0	0	0	0	0	0	0	0	0	0	0	0	0	0	0	0	0	0	0	0	0	0	0	0	0	0	0	0
A_ASV02563	Archaea	Nanoarchaeota	Nanoarchaeia	Woesearchaeales	Un_Woesearchaeales	Un_Woesearchaeales	Un_Woesearchaeales		0	0	0	0	0	0	0	46	0	0	0	0	0	0	0	0	0	0	0	0	0	0	0	0	0	0	0	0	0	0	0	0	0	0	0	0	0	0	0	0	0
A_ASV02572	Archaea	Nanoarchaeota	Nanoarchaeia	Woesearchaeales	Un_Woesearchaeales	Un_Woesearchaeales	Un_Woesearchaeales		0	0	0	0	0	0	0	0	0	0	0	0	46	0	0	0	0	0	0	0	0	0	0	0	0	0	0	0	0	0	0	0	0	0	0	0	0	0	0	0	0
A_ASV02574	Archaea	Nanoarchaeota	Nanoarchaeia	Woesearchaeales	Un_Woesearchaeales	Un_Woesearchaeales	Un_Woesearchaeales		0	0	0	0	0	0	0	0	0	0	0	0	18	0	0	0	0	0	16	0	0	0	0	0	0	0	0	0	0	0	12	0	0	0	0	0	0	0	0	0	0
A_ASV02578	Archaea	Nanoarchaeota	Nanoarchaeia	Woesearchaeales	Un_Woesearchaeales	Un_Woesearchaeales	Un_Woesearchaeales		0	0	0	0	0	0	0	0	0	0	0	0	0	12	0	34	0	0	0	0	0	0	0	0	0	0	0	0	0	0	0	0	0	0	0	0	0	0	0	0	0
A_ASV02565	Archaea	Thermoplasmatota	Thermoplasmata	Marine Benthic Group D and DHVEG-1	Un_Marine Benthic Group D and DHVEG-1	Un_Marine Benthic Group D and DHVEG-1	Un_Marine Benthic Group D and DHVEG-1		0	0	0	0	0	0	0	46	0	0	0	0	0	0	0	0	0	0	0	0	0	0	0	0	0	0	0	0	0	0	0	0	0	0	0	0	0	0	0	0	0
A_ASV02567	Archaea	Thermoplasmatota	Thermoplasmata	Marine Benthic Group D and DHVEG-1	Un_Marine Benthic Group D and DHVEG-1	Un_Marine Benthic Group D and DHVEG-1	Un_Marine Benthic Group D and DHVEG-1		0	0	0	0	0	0	0	0	46	0	0	0	0	0	0	0	0	0	0	0	0	0	0	0	0	0	0	0	0	0	0	0	0	0	0	0	0	0	0	0	0
A_ASV02573	Archaea	Thermoplasmatota	Thermoplasmata	Marine Benthic Group D and DHVEG-1	Un_Marine Benthic Group D and DHVEG-1	Un_Marine Benthic Group D and DHVEG-1	Un_Marine Benthic Group D and DHVEG-1		0	0	0	0	0	0	0	0	0	0	0	0	19	0	0	27	0	0	0	0	0	0	0	0	0	0	0	0	0	0	0	0	0	0	0	0	0	0	0	0	0
A_ASV02596	Archaea	Thermoplasmatota	Thermoplasmata	Marine Benthic Group D and DHVEG-1	Un_Marine Benthic Group D and DHVEG-1	Un_Marine Benthic Group D and DHVEG-1	Un_Marine Benthic Group D and DHVEG-1		0	0	0	0	0	0	0	0	0	0	0	0	0	0	0	0	0	0	0	0	0	0	0	0	0	0	0	0	0	0	0	0	0	0	0	0	0	0	0	0	0
A_ASV02597	Archaea	Thermoplasmatota	Thermoplasmata	Marine Benthic Group D and DHVEG-1	Un_Marine Benthic Group D and DHVEG-1	Un_Marine Benthic Group D and DHVEG-1	Un_Marine Benthic Group D and DHVEG-1		0	0	0	0	0	0	0	0	0	0	0	0	0	0	0	0	0	0	0	0	0	0	0	0	0	0	0	0	0	0	0	0	0	0	0	0	0	0	0	0	0
A_ASV02624	Archaea	Aenigmarchaeota	Deep Sea Euryarchaeotic Group(DSEG)	Un_Deep Sea Euryarchaeotic Group(DSEG)	Un_Deep Sea Euryarchaeotic Group(DSEG)	Un_Deep Sea Euryarchaeotic Group(DSEG)	Un_Deep Sea Euryarchaeotic Group(DSEG)		0	0	0	0	0	0	0	0	0	0	0	0	0	0	0	0	0	0	0	0	0	0	0	0	0	0	0	0	0	0	0	0	0	0	0	0	0	0	0	45	0
A_ASV02611	Archaea	Asgardarchaeota	Un_Asgardarchaeota	Un_Asgardarchaeota	Un_Asgardarchaeota	Un_Asgardarchaeota	Un_Asgardarchaeota		0	0	0	0	0	0	0	0	0	0	0	0	0	0	0	0	0	0	45	0	0	0	0	0	0	0	0	0	0	0	0	0	0	0	0	0	0	0	0	0	0
A_ASV02625	Archaea	Crenarchaeota	Bathyarchaeia	Un_Bathyarchaeia	Un_Bathyarchaeia	Un_Bathyarchaeia	Un_Bathyarchaeia		0	0	0	0	0	0	0	0	0	0	0	0	0	0	0	0	0	0	0	0	0	0	0	0	0	0	0	0	0	0	0	0	0	0	0	0	0	0	0	0	0
A_ASV02601	Archaea	Crenarchaeota	Bathyarchaeia	Un_Bathyarchaeia	Un_Bathyarchaeia	Un_Bathyarchaeia	Un_Bathyarchaeia		0	0	0	0	28	0	0	0	0	0	0	0	0	0	0	0	17	0	0	0	0	0	0	0	0	0	0	0	0	0	0	0	0	0	0	0	0	0	0	0	0
A_ASV02623	Archaea	Micrarchaeota	Micrarchaeia	Micrarchaeales	Un_Micrarchaeales	Un_Micrarchaeales	Un_Micrarchaeales		0	0	0	0	0	0	0	0	0	0	0	0	0	0	0	0	0	0	0	0	0	0	0	0	0	0	0	0	0	0	0	0	0	0	0	0	0	0	0	45	0
A_ASV02612	Archaea	Un_Archaea	Un_Archaea	Un_Archaea	Un_Archaea	Un_Archaea	Un_Archaea		0	0	0	0	0	0	0	0	0	0	0	0	0	0	0	0	0	0	45	0	0	0	0	0	0	0	0	0	0	0	0	0	0	0	0	0	0	0	0	0	0
A_ASV02602	Archaea	Un_Archaea	Un_Archaea	Un_Archaea	Un_Archaea	Un_Archaea	Un_Archaea		0	0	0	0	0	45	0	0	0	0	0	0	0	0	0	0	0	0	0	0	0	0	0	0	0	0	0	0	0	0	0	0	0	0	0	0	0	0	0	0	0
A_ASV02613	Archaea	Nanoarchaeota	Nanoarchaeia	Woesearchaeales	Un_Woesearchaeales	Un_Woesearchaeales	Un_Woesearchaeales		0	0	0	0	0	0	0	0	0	0	0	0	0	0	0	0	0	0	45	0	0	0	0	0	0	0	0	0	0	0	0	0	0	0	0	0	0	0	0	0	0
A_ASV02622	Archaea	Nanoarchaeota	Nanoarchaeia	Woesearchaeales	Un_Woesearchaeales	Un_Woesearchaeales	Un_Woesearchaeales		0	0	0	0	0	0	0	0	0	0	0	0	0	0	0	0	0	0	0	0	0	0	0	0	0	0	0	0	0	0	0	0	0	0	0	0	0	0	0	45	0
A_ASV02604	Archaea	Nanoarchaeota	Nanoarchaeia	Woesearchaeales	Un_Woesearchaeales	Un_Woesearchaeales	Un_Woesearchaeales		0	0	0	0	0	0	0	29	0	0	0	0	0	0	0	16	0	0	0	0	0	0	0	0	0	0	0	0	0	0	0	0	0	0	0	0	0	0	0	0	0
A_ASV02605	Archaea	Nanoarchaeota	Nanoarchaeia	Woesearchaeales	Un_Woesearchaeales	Un_Woesearchaeales	Un_Woesearchaeales		0	0	0	0	0	0	0	0	45	0	0	0	0	0	0	0	0	0	0	0	0	0	0	0	0	0	0	0	0	0	0	0	0	0	0	0	0	0	0	0	0
A_ASV02610	Archaea	Nanoarchaeota	Nanoarchaeia	Woesearchaeales	Un_Woesearchaeales	Un_Woesearchaeales	Un_Woesearchaeales		0	0	0	0	0	0	0	0	0	0	0	0	0	0	0	0	45	0	0	0	0	0	0	0	0	0	0	0	0	0	0	0	0	0	0	0	0	0	0	0	0
A_ASV02619	Archaea	Nanoarchaeota	Nanoarchaeia	Woesearchaeales	Un_Woesearchaeales	Un_Woesearchaeales	Un_Woesearchaeales		0	0	0	0	0	0	0	0	0	0	0	0	0	0	0	0	0	0	0	0	0	0	0	0	0	0	0	0	0	0	0	0	0	0	0	0	18	27	0	0	0
A_ASV02620	Archaea	Nanoarchaeota	Nanoarchaeia	Woesearchaeales	Un_Woesearchaeales	Un_Woesearchaeales	Un_Woesearchaeales		0	0	0	0	0	0	0	0	0	0	0	0	0	0	0	0	0	0	0	0	0	0	0	0	0	0	0	0	0	0	0	0	0	0	0	0	0	45	0	0	0
A_ASV02617	Archaea	Nanoarchaeota	Nanoarchaeia	Woesearchaeales	Un_Woesearchaeales	Un_Woesearchaeales	Un_Woesearchaeales		0	0	0	0	0	0	0	0	0	0	0	0	0	0	0	0	0	0	0	0	0	0	0	0	0	0	0	0	0	0	45	0	0	0	0	0	0	0	0	0	0
A_ASV02627	Archaea	Nanoarchaeota	Nanoarchaeia	Woesearchaeales	Un_Woesearchaeales	Un_Woesearchaeales	Un_Woesearchaeales		0	0	0	0	0	0	0	0	0	0	0	0	0	0	0	0	0	0	0	0	0	0	0	0	0	0	0	0	0	0	0	0	0	0	0	0	0	0	0	0	0
A_ASV02615	Archaea	Nanoarchaeota	Nanoarchaeia	Woesearchaeales	SCGC AAA286-E23	Un_SCGC AAA286-E23	Un_SCGC AAA286-E23		0	0	0	0	0	0	0	0	0	0	0	0	0	0	0	0	0	0	0	0	0	0	0	0	0	0	0	45	0	0	0	0	0	0	0	0	0	0	0	0	0
A_ASV02603	Archaea	Thermoplasmatota	Thermoplasmata	Marine Benthic Group D and DHVEG-1	Un_Marine Benthic Group D and DHVEG-1	Un_Marine Benthic Group D and DHVEG-1	Un_Marine Benthic Group D and DHVEG-1		0	0	0	0	0	0	45	0	0	0	0	0	0	0	0	0	0	0	0	0	0	0	0	0	0	0	0	0	0	0	0	0	0	0	0	0	0	0	0	0	0
A_ASV02606	Archaea	Thermoplasmatota	Thermoplasmata	Un_Thermoplasmata	Un_Thermoplasmata	Un_Thermoplasmata	Un_Thermoplasmata		0	0	0	0	0	0	0	0	45	0	0	0	0	0	0	0	0	0	0	0	0	0	0	0	0	0	0	0	0	0	0	0	0	0	0	0	0	0	0	0	0
A_ASV02609	Archaea	Thermoplasmatota	Thermoplasmata	Un_Thermoplasmata	Un_Thermoplasmata	Un_Thermoplasmata	Un_Thermoplasmata		0	0	0	0	0	0	0	0	0	0	0	0	45	0	0	0	0	0	0	0	0	0	0	0	0	0	0	0	0	0	0	0	0	0	0	0	0	0	0	0	0
A_ASV02638	Archaea	Asgardarchaeota	Lokiarchaeia	Lokiarchaeia	Lokiarchaeia	Lokiarchaeia	Lokiarchaeia		0	0	0	0	0	0	0	0	44	0	0	0	0	0	0	0	0	0	0	0	0	0	0	0	0	0	0	0	0	0	0	0	0	0	0	0	0	0	0	0	0
A_ASV02647	Archaea	Asgardarchaeota	Lokiarchaeia	Lokiarchaeia	Lokiarchaeia	Lokiarchaeia	Lokiarchaeia		0	0	0	0	0	0	0	0	0	0	0	0	0	0	0	44	0	0	0	0	0	0	0	0	0	0	0	0	0	0	0	0	0	0	0	0	0	0	0	0	0
A_ASV02637	Archaea	Crenarchaeota	Bathyarchaeia	Un_Bathyarchaeia	Un_Bathyarchaeia	Un_Bathyarchaeia	Un_Bathyarchaeia		0	0	0	0	0	0	0	0	44	0	0	0	0	0	0	0	0	0	0	0	0	0	0	0	0	0	0	0	0	0	0	0	0	0	0	0	0	0	0	0	0
A_ASV02654	Archaea	Crenarchaeota	Bathyarchaeia	Un_Bathyarchaeia	Un_Bathyarchaeia	Un_Bathyarchaeia	Un_Bathyarchaeia		0	0	0	0	0	0	0	0	0	0	0	0	0	0	0	0	0	0	0	0	0	0	0	0	0	0	0	0	0	0	0	0	0	0	0	44	0	0	0	0	0
A_ASV02643	Archaea	Euryarchaeota	Thermococci	Methanofastidiosales	Un_Methanofastidiosales	Un_Methanofastidiosales	Un_Methanofastidiosales		0	0	0	0	0	0	0	0	0	0	0	0	44	0	0	0	0	0	0	0	0	0	0	0	0	0	0	0	0	0	0	0	0	0	0	0	0	0	0	0	0
A_ASV02656	Archaea	Hydrothermarchaeota	Hydrothermarchaeia	Hydrothermarchaeales	Un_Hydrothermarchaeales	Un_Hydrothermarchaeales	Un_Hydrothermarchaeales		0	0	0	0	0	0	0	0	0	0	0	0	0	0	0	0	0	0	0	0	0	0	0	0	0	0	0	0	0	0	0	0	0	0	0	0	0	0	0	44	0
A_ASV02631	Archaea	Un_Archaea	Un_Archaea	Un_Archaea	Un_Archaea	Un_Archaea	Un_Archaea		0	0	27	17	0	0	0	0	0	0	0	0	0	0	0	0	0	0	0	0	0	0	0	0	0	0	0	0	0	0	0	0	0	0	0	0	0	0	0	0	0
A_ASV02641	Archaea	Nanoarchaeota	Nanoarchaeia	Woesearchaeales	Un_Woesearchaeales	Un_Woesearchaeales	Un_Woesearchaeales		0	0	0	0	0	0	0	0	0	0	0	44	0	0	0	0	0	0	0	0	0	0	0	0	0	0	0	0	0	0	0	0	0	0	0	0	0	0	0	0	0
A_ASV02646	Archaea	Nanoarchaeota	Nanoarchaeia	Woesearchaeales	Un_Woesearchaeales	Un_Woesearchaeales	Un_Woesearchaeales		0	0	0	0	0	0	0	0	0	0	0	0	0	44	0	0	0	0	0	0	0	0	0	0	0	0	0	0	0	0	0	0	0	0	0	0	0	0	0	0	0
A_ASV02635	Archaea	Nanoarchaeota	Nanoarchaeia	Woesearchaeales	Un_Woesearchaeales	Un_Woesearchaeales	Un_Woesearchaeales		0	0	0	0	0	0	0	0	44	0	0	0	0	0	0	0	0	0	0	0	0	0	0	0	0	0	0	0	0	0	0	0	0	0	0	0	0	0	0	0	0
A_ASV02636	Archaea	Nanoarchaeota	Nanoarchaeia	Woesearchaeales	Un_Woesearchaeales	Un_Woesearchaeales	Un_Woesearchaeales		0	0	0	0	0	0	0	0	44	0	0	0	0	0	0	0	0	0	0	0	0	0	0	0	0	0	0	0	0	0	0	0	0	0	0	0	0	0	0	0	0
A_ASV02639	Archaea	Nanoarchaeota	Nanoarchaeia	Woesearchaeales	Un_Woesearchaeales	Un_Woesearchaeales	Un_Woesearchaeales		0	0	0	0	0	0	0	0	0	44	0	0	0	0	0	0	0	0	0	0	0	0	0	0	0	0	0	0	0	0	0	0	0	0	0	0	0	0	0	0	0
A_ASV02640	Archaea	Nanoarchaeota	Nanoarchaeia	Woesearchaeales	Un_Woesearchaeales	Un_Woesearchaeales	Un_Woesearchaeales		0	0	0	0	0	0	0	0	0	11	0	0	15	0	18	0	0	0	0	0	0	0	0	0	0	0	0	0	0	0	0	0	0	0	0	0	0	0	0	0	0
A_ASV02649	Archaea	Nanoarchaeota	Nanoarchaeia	Woesearchaeales	Un_Woesearchaeales	Un_Woesearchaeales	Un_Woesearchaeales		0	0	0	0	0	0	0	0	0	0	0	0	0	0	0	0	0	0	44	0	0	0	0	0	0	0	0	0	0	0	0	0	0	0	0	0	0	0	0	0	0
A_ASV02653	Archaea	Nanoarchaeota	Nanoarchaeia	Woesearchaeales	Un_Woesearchaeales	Un_Woesearchaeales	Un_Woesearchaeales		0	0	0	0	0	0	0	0	0	0	0	0	0	0	0	0	0	0	0	0	0	0	0	0	0	0	0	0	18	0	26	0	0	0	0	0	0	0	0	0	0
A_ASV02658	Archaea	Nanoarchaeota	Nanoarchaeia	Woesearchaeales	Un_Woesearchaeales	Un_Woesearchaeales	Un_Woesearchaeales		0	0	0	0	0	0	0	0	0	0	0	0	0	0	0	0	0	0	0	0	0	0	0	0	0	0	0	0	0	0	0	0	0	0	0	0	0	0	0	0	0
A_ASV02645	Archaea	Nanoarchaeota	Nanoarchaeia	Woesearchaeales	Un_Woesearchaeales	Un_Woesearchaeales	Un_Woesearchaeales		0	0	0	0	0	0	0	0	0	0	0	0	9	0	21	0	0	0	14	0	0	0	0	0	0	0	0	0	0	0	0	0	0	0	0	0	0	0	0	0	0
A_ASV02659	Archaea	Thermoplasmatota	Thermoplasmata	Marine Benthic Group D and DHVEG-1	Un_Marine Benthic Group D and DHVEG-1	Un_Marine Benthic Group D and DHVEG-1	Un_Marine Benthic Group D and DHVEG-1		0	0	0	0	0	0	0	0	0	0	0	0	0	0	0	0	0	0	0	0	0	0	0	0	0	0	0	0	0	0	0	0	0	0	0	0	0	0	0	0	0
A_ASV02661	Archaea	Thermoplasmatota	Thermoplasmata	Marine Benthic Group D and DHVEG-1	Un_Marine Benthic Group D and DHVEG-1	Un_Marine Benthic Group D and DHVEG-1	Un_Marine Benthic Group D and DHVEG-1		0	0	0	0	0	0	0	0	0	0	0	0	0	0	0	0	0	0	0	0	0	0	0	0	0	0	0	0	0	0	0	0	0	0	0	0	0	0	0	0	0
A_ASV02662	Archaea	Thermoplasmatota	Thermoplasmata	SG8-5	Un_SG8-5	Un_SG8-5	Un_SG8-5		0	0	0	0	0	0	0	0	0	0	0	0	0	0	0	0	0	0	0	0	0	0	0	0	0	0	0	0	0	0	0	0	0	0	0	0	0	0	0	0	0
A_ASV02665	Archaea	Asgardarchaeota	Un_Asgardarchaeota	Un_Asgardarchaeota	Un_Asgardarchaeota	Un_Asgardarchaeota	Un_Asgardarchaeota		0	43	0	0	0	0	0	0	0	0	0	0	0	0	0	0	0	0	0	0	0	0	0	0	0	0	0	0	0	0	0	0	0	0	0	0	0	0	0	0	0
A_ASV02692	Archaea	Asgardarchaeota	Un_Asgardarchaeota	Un_Asgardarchaeota	Un_Asgardarchaeota	Un_Asgardarchaeota	Un_Asgardarchaeota		0	0	0	0	0	0	0	0	0	0	0	0	0	0	0	0	0	43	0	0	0	0	0	0	0	0	0	0	0	0	0	0	0	0	0	0	0	0	0	0	0
A_ASV02672	Archaea	Crenarchaeota	Bathyarchaeia	Un_Bathyarchaeia	Un_Bathyarchaeia	Un_Bathyarchaeia	Un_Bathyarchaeia		0	0	0	0	0	0	0	43	0	0	0	0	0	0	0	0	0	0	0	0	0	0	0	0	0	0	0	0	0	0	0	0	0	0	0	0	0	0	0	0	0
A_ASV02681	Archaea	Crenarchaeota	Bathyarchaeia	Un_Bathyarchaeia	Un_Bathyarchaeia	Un_Bathyarchaeia	Un_Bathyarchaeia		0	0	0	0	0	0	0	0	0	0	0	0	43	0	0	0	0	0	0	0	0	0	0	0	0	0	0	0	0	0	0	0	0	0	0	0	0	0	0	0	0
A_ASV02682	Archaea	Crenarchaeota	Bathyarchaeia	Un_Bathyarchaeia	Un_Bathyarchaeia	Un_Bathyarchaeia	Un_Bathyarchaeia		0	0	0	0	0	0	0	0	0	0	0	0	43	0	0	0	0	0	0	0	0	0	0	0	0	0	0	0	0	0	0	0	0	0	0	0	0	0	0	0	0
A_ASV02693	Archaea	Crenarchaeota	Bathyarchaeia	Un_Bathyarchaeia	Un_Bathyarchaeia	Un_Bathyarchaeia	Un_Bathyarchaeia		0	0	0	0	0	0	0	0	0	0	0	0	0	0	0	0	0	0	43	0	0	0	0	0	0	0	0	0	0	0	0	0	0	0	0	0	0	0	0	0	0
A_ASV02703	Archaea	Crenarchaeota	Bathyarchaeia	Un_Bathyarchaeia	Un_Bathyarchaeia	Un_Bathyarchaeia	Un_Bathyarchaeia		0	0	0	0	0	0	0	0	0	0	0	0	0	0	0	0	0	0	0	0	0	0	0	0	0	0	0	0	0	0	0	0	0	0	0	43	0	0	0	0	0
A_ASV02711	Archaea	Crenarchaeota	Bathyarchaeia	Un_Bathyarchaeia	Un_Bathyarchaeia	Un_Bathyarchaeia	Un_Bathyarchaeia		0	0	0	0	0	0	0	0	0	0	0	0	0	0	0	0	0	0	0	0	0	0	0	0	0	0	0	0	0	0	0	0	0	0	0	0	0	0	0	0	0
A_ASV02712	Archaea	Crenarchaeota	Bathyarchaeia	Un_Bathyarchaeia	Un_Bathyarchaeia	Un_Bathyarchaeia	Un_Bathyarchaeia		0	0	0	0	0	0	0	0	0	0	0	0	0	0	0	0	0	0	0	0	0	0	0	0	0	0	0	0	0	0	0	0	0	0	0	0	0	0	0	0	0
A_ASV02694	Archaea	Crenarchaeota	Bathyarchaeia	Un_Bathyarchaeia	Un_Bathyarchaeia	Un_Bathyarchaeia	Un_Bathyarchaeia		0	0	0	0	0	0	0	0	0	0	0	0	0	0	0	0	0	0	43	0	0	0	0	0	0	0	0	0	0	0	0	0	0	0	0	0	0	0	0	0	0
A_ASV02701	Archaea	Crenarchaeota	Bathyarchaeia	Un_Bathyarchaeia	Un_Bathyarchaeia	Un_Bathyarchaeia	Un_Bathyarchaeia		0	0	0	0	0	0	0	0	0	0	0	0	0	0	0	0	0	0	0	0	0	0	0	0	0	0	0	0	0	0	0	0	0	43	0	0	0	0	0	0	0
A_ASV02697	Archaea	Euryarchaeota	Thermococci	Methanofastidiosales	Un_Methanofastidiosales	Un_Methanofastidiosales	Un_Methanofastidiosales		0	0	0	0	0	0	0	0	0	0	0	0	0	0	0	0	0	0	0	43	0	0	0	0	0	0	0	0	0	0	0	0	0	0	0	0	0	0	0	0	0
A_ASV02714	Archaea	Euryarchaeota	Thermococci	Methanofastidiosales	Un_Methanofastidiosales	Un_Methanofastidiosales	Un_Methanofastidiosales		0	0	0	0	0	0	0	0	0	0	0	0	0	0	0	0	0	0	0	0	0	0	0	0	0	0	0	0	0	0	0	0	0	0	0	0	0	0	0	0	0
A_ASV02696	Archaea	Nanoarchaeota	Nanoarchaeia	Woesearchaeales	GW2011_GWC1_47_15	Un_GW2011_GWC1_47_15	Un_GW2011_GWC1_47_15		0	0	0	0	0	0	0	0	0	0	0	0	0	0	0	0	0	0	12	0	0	0	0	0	0	0	0	0	24	0	0	7	0	0	0	0	0	0	0	0	0
A_ASV02669	Archaea	Nanoarchaeota	Nanoarchaeia	Woesearchaeales	Un_Woesearchaeales	Un_Woesearchaeales	Un_Woesearchaeales		0	0	0	0	0	18	0	0	0	0	0	0	0	0	0	25	0	0	0	0	0	0	0	0	0	0	0	0	0	0	0	0	0	0	0	0	0	0	0	0	0
A_ASV02674	Archaea	Nanoarchaeota	Nanoarchaeia	Woesearchaeales	Un_Woesearchaeales	Un_Woesearchaeales	Un_Woesearchaeales		0	0	0	0	0	0	0	0	43	0	0	0	0	0	0	0	0	0	0	0	0	0	0	0	0	0	0	0	0	0	0	0	0	0	0	0	0	0	0	0	0
A_ASV02680	Archaea	Nanoarchaeota	Nanoarchaeia	Woesearchaeales	Un_Woesearchaeales	Un_Woesearchaeales	Un_Woesearchaeales		0	0	0	0	0	0	0	0	0	0	0	0	43	0	0	0	0	0	0	0	0	0	0	0	0	0	0	0	0	0	0	0	0	0	0	0	0	0	0	0	0
A_ASV02684	Archaea	Nanoarchaeota	Nanoarchaeia	Woesearchaeales	Un_Woesearchaeales	Un_Woesearchaeales	Un_Woesearchaeales		0	0	0	0	0	0	0	0	0	0	0	0	38	0	0	0	0	0	0	0	0	0	0	0	0	0	0	0	0	0	0	0	0	0	0	0	0	0	0	0	5
A_ASV02685	Archaea	Nanoarchaeota	Nanoarchaeia	Woesearchaeales	Un_Woesearchaeales	Un_Woesearchaeales	Un_Woesearchaeales		0	0	0	0	0	0	0	0	0	0	0	0	30	13	0	0	0	0	0	0	0	0	0	0	0	0	0	0	0	0	0	0	0	0	0	0	0	0	0	0	0
A_ASV02713	Archaea	Nanoarchaeota	Nanoarchaeia	Woesearchaeales	Un_Woesearchaeales	Un_Woesearchaeales	Un_Woesearchaeales		0	0	0	0	0	0	0	0	0	0	0	0	0	0	0	0	0	0	0	0	0	0	0	0	0	0	0	0	0	0	0	0	0	0	0	0	0	0	0	0	0
A_ASV02683	Archaea	Nanoarchaeota	Nanoarchaeia	Woesearchaeales	Un_Woesearchaeales	Un_Woesearchaeales	Un_Woesearchaeales		0	0	0	0	0	0	0	0	0	0	0	0	43	0	0	0	0	0	0	0	0	0	0	0	0	0	0	0	0	0	0	0	0	0	0	0	0	0	0	0	0
A_ASV02673	Archaea	Thermoplasmatota	Thermoplasmata	Marine Benthic Group D and DHVEG-1	Un_Marine Benthic Group D and DHVEG-1	Un_Marine Benthic Group D and DHVEG-1	Un_Marine Benthic Group D and DHVEG-1		0	0	0	0	0	0	0	34	0	0	0	0	0	0	0	2	0	4	0	0	0	0	0	0	0	0	0	0	0	0	3	0	0	0	0	0	0	0	0	0	0
A_ASV02715	Archaea	Thermoplasmatota	Thermoplasmata	Marine Benthic Group D and DHVEG-1	Un_Marine Benthic Group D and DHVEG-1	Un_Marine Benthic Group D and DHVEG-1	Un_Marine Benthic Group D and DHVEG-1		0	0	0	0	0	0	0	0	0	0	0	0	0	0	0	0	0	0	0	0	0	0	0	0	0	0	0	0	0	0	0	0	0	0	0	0	0	0	0	0	0
A_ASV02668	Archaea	Thermoplasmatota	Thermoplasmata	Marine Group II	Un_Marine Group II	Un_Marine Group II	Un_Marine Group II		0	0	0	0	12	0	0	0	0	0	0	0	0	0	0	0	0	0	0	0	0	0	0	0	0	0	0	0	0	0	0	0	0	0	0	0	0	31	0	0	0
A_ASV02666	Archaea	Thermoplasmatota	Thermoplasmata	Un_Thermoplasmata	Un_Thermoplasmata	Un_Thermoplasmata	Un_Thermoplasmata		0	3	0	0	0	0	0	0	0	0	0	0	0	0	0	0	0	0	0	0	0	0	0	0	0	0	0	0	0	0	0	0	0	0	0	0	8	32	0	0	0
A_ASV02671	Archaea	Thermoplasmatota	Thermoplasmata	Un_Thermoplasmata	Un_Thermoplasmata	Un_Thermoplasmata	Un_Thermoplasmata		0	0	0	0	0	0	0	43	0	0	0	0	0	0	0	0	0	0	0	0	0	0	0	0	0	0	0	0	0	0	0	0	0	0	0	0	0	0	0	0	0
A_ASV02706	Archaea	Thermoplasmatota	Thermoplasmata	Un_Thermoplasmata	Un_Thermoplasmata	Un_Thermoplasmata	Un_Thermoplasmata		0	0	0	0	0	0	0	0	0	0	0	0	0	0	0	0	0	0	0	0	0	0	0	0	0	0	0	0	0	0	0	0	0	0	0	0	0	0	43	0	0
A_ASV02727	Archaea	Aenigmarchaeota	Aenigmarchaeia	Aenigmarchaeales	Un_Aenigmarchaeales	Un_Aenigmarchaeales	Un_Aenigmarchaeales		0	0	0	0	0	0	0	0	32	0	0	0	0	0	0	0	0	0	0	0	0	0	0	0	0	0	0	0	10	0	0	0	0	0	0	0	0	0	0	0	0
A_ASV02723	Archaea	Asgardarchaeota	Un_Asgardarchaeota	Un_Asgardarchaeota	Un_Asgardarchaeota	Un_Asgardarchaeota	Un_Asgardarchaeota		0	0	0	0	0	0	0	42	0	0	0	0	0	0	0	0	0	0	0	0	0	0	0	0	0	0	0	0	0	0	0	0	0	0	0	0	0	0	0	0	0
A_ASV02750	Archaea	Crenarchaeota	Bathyarchaeia	Un_Bathyarchaeia	Un_Bathyarchaeia	Un_Bathyarchaeia	Un_Bathyarchaeia		0	0	0	0	0	0	0	0	0	0	0	0	0	0	0	0	0	0	0	0	0	0	0	0	0	0	0	0	0	0	0	0	0	0	0	0	0	0	0	0	0
A_ASV02747	Archaea	Crenarchaeota	Bathyarchaeia	Un_Bathyarchaeia	Un_Bathyarchaeia	Un_Bathyarchaeia	Un_Bathyarchaeia		0	0	0	0	0	0	0	0	0	0	0	0	0	0	0	0	0	0	0	0	0	0	0	0	0	0	0	0	0	0	0	0	0	0	0	0	0	0	0	42	0
A_ASV02721	Archaea	Euryarchaeota	Thermococci	Methanofastidiosales	Un_Methanofastidiosales	Un_Methanofastidiosales	Un_Methanofastidiosales		0	10	32	0	0	0	0	0	0	0	0	0	0	0	0	0	0	0	0	0	0	0	0	0	0	0	0	0	0	0	0	0	0	0	0	0	0	0	0	0	0
A_ASV02749	Archaea	Euryarchaeota	Thermococci	Methanofastidiosales	Un_Methanofastidiosales	Un_Methanofastidiosales	Un_Methanofastidiosales		0	0	0	0	0	0	0	0	0	0	0	0	0	0	0	0	0	0	0	0	0	0	0	0	0	0	0	0	0	0	0	0	0	0	0	0	0	0	0	42	0
A_ASV02732	Archaea	Un_Archaea	Un_Archaea	Un_Archaea	Un_Archaea	Un_Archaea	Un_Archaea		0	0	0	0	0	0	0	0	0	0	0	0	0	42	0	0	0	0	0	0	0	0	0	0	0	0	0	0	0	0	0	0	0	0	0	0	0	0	0	0	0
A_ASV02742	Archaea	Un_Archaea	Un_Archaea	Un_Archaea	Un_Archaea	Un_Archaea	Un_Archaea		0	0	0	0	0	0	0	0	0	0	0	0	0	0	0	0	0	0	0	0	0	0	0	0	0	0	0	0	42	0	0	0	0	0	0	0	0	0	0	0	0
A_ASV02729	Archaea	Nanoarchaeota	Nanoarchaeia	Woesearchaeales	Un_Woesearchaeales	Un_Woesearchaeales	Un_Woesearchaeales		0	0	0	0	0	0	0	0	0	0	42	0	0	0	0	0	0	0	0	0	0	0	0	0	0	0	0	0	0	0	0	0	0	0	0	0	0	0	0	0	0
A_ASV02748	Archaea	Nanoarchaeota	Nanoarchaeia	Woesearchaeales	Un_Woesearchaeales	Un_Woesearchaeales	Un_Woesearchaeales		0	0	0	0	0	0	0	0	0	0	0	0	0	0	0	0	0	0	0	0	0	0	0	0	0	0	0	0	0	0	0	0	0	0	0	0	0	0	0	42	0
A_ASV02724	Archaea	Nanoarchaeota	Nanoarchaeia	Woesearchaeales	Un_Woesearchaeales	Un_Woesearchaeales	Un_Woesearchaeales		0	0	0	0	0	0	0	42	0	0	0	0	0	0	0	0	0	0	0	0	0	0	0	0	0	0	0	0	0	0	0	0	0	0	0	0	0	0	0	0	0
A_ASV02734	Archaea	Nanoarchaeota	Nanoarchaeia	Woesearchaeales	Un_Woesearchaeales	Un_Woesearchaeales	Un_Woesearchaeales		0	0	0	0	0	0	0	0	0	0	0	0	0	0	42	0	0	0	0	0	0	0	0	0	0	0	0	0	0	0	0	0	0	0	0	0	0	0	0	0	0
A_ASV02719	Archaea	Nanoarchaeota	Nanoarchaeia	Woesearchaeales	Un_Woesearchaeales	Un_Woesearchaeales	Un_Woesearchaeales		0	42	0	0	0	0	0	0	0	0	0	0	0	0	0	0	0	0	0	0	0	0	0	0	0	0	0	0	0	0	0	0	0	0	0	0	0	0	0	0	0
A_ASV02725	Archaea	Nanoarchaeota	Nanoarchaeia	Woesearchaeales	Un_Woesearchaeales	Un_Woesearchaeales	Un_Woesearchaeales		0	0	0	0	0	0	0	0	42	0	0	0	0	0	0	0	0	0	0	0	0	0	0	0	0	0	0	0	0	0	0	0	0	0	0	0	0	0	0	0	0
A_ASV02726	Archaea	Nanoarchaeota	Nanoarchaeia	Woesearchaeales	Un_Woesearchaeales	Un_Woesearchaeales	Un_Woesearchaeales		0	0	0	0	0	0	0	0	42	0	0	0	0	0	0	0	0	0	0	0	0	0	0	0	0	0	0	0	0	0	0	0	0	0	0	0	0	0	0	0	0
A_ASV02728	Archaea	Nanoarchaeota	Nanoarchaeia	Woesearchaeales	Un_Woesearchaeales	Un_Woesearchaeales	Un_Woesearchaeales		0	0	0	0	0	0	0	0	0	25	17	0	0	0	0	0	0	0	0	0	0	0	0	0	0	0	0	0	0	0	0	0	0	0	0	0	0	0	0	0	0
A_ASV02731	Archaea	Nanoarchaeota	Nanoarchaeia	Woesearchaeales	Un_Woesearchaeales	Un_Woesearchaeales	Un_Woesearchaeales		0	0	0	0	0	0	0	0	0	0	0	0	42	0	0	0	0	0	0	0	0	0	0	0	0	0	0	0	0	0	0	0	0	0	0	0	0	0	0	0	0
A_ASV02745	Archaea	Thermoplasmatota	Thermoplasmata	Marine Benthic Group D and DHVEG-1	Un_Marine Benthic Group D and DHVEG-1	Un_Marine Benthic Group D and DHVEG-1	Un_Marine Benthic Group D and DHVEG-1		0	0	0	0	0	0	0	0	0	0	0	0	0	0	0	0	0	0	0	0	0	0	0	0	0	0	0	0	0	0	0	0	0	0	0	0	42	0	0	0	0
A_ASV02786	Archaea	Aenigmarchaeota	Aenigmarchaeia	Aenigmarchaeales	Un_Aenigmarchaeales	Un_Aenigmarchaeales	Un_Aenigmarchaeales		0	0	0	0	0	0	0	0	0	0	0	0	0	0	0	0	0	0	0	0	0	0	0	0	0	0	0	0	0	0	0	0	0	41	0	0	0	0	0	0	0
A_ASV02791	Archaea	Asgardarchaeota	Lokiarchaeia	Lokiarchaeia	Lokiarchaeia	Lokiarchaeia	Lokiarchaeia		0	0	0	0	0	0	0	0	0	0	0	0	0	0	0	0	0	0	0	0	0	0	0	0	0	0	0	0	0	0	0	0	0	0	0	0	0	0	0	0	0
A_ASV02751	Archaea	Crenarchaeota	Bathyarchaeia	Un_Bathyarchaeia	Un_Bathyarchaeia	Un_Bathyarchaeia	Un_Bathyarchaeia		6	0	0	0	0	0	20	0	0	0	0	0	0	0	0	0	0	0	0	0	0	0	0	0	0	0	0	0	0	0	0	0	0	0	0	0	0	0	0	0	0
A_ASV02775	Archaea	Crenarchaeota	Bathyarchaeia	Un_Bathyarchaeia	Un_Bathyarchaeia	Un_Bathyarchaeia	Un_Bathyarchaeia		0	0	0	0	0	0	0	0	0	0	0	0	0	0	0	0	0	0	41	0	0	0	0	0	0	0	0	0	0	0	0	0	0	0	0	0	0	0	0	0	0
A_ASV02780	Archaea	Crenarchaeota	Bathyarchaeia	Un_Bathyarchaeia	Un_Bathyarchaeia	Un_Bathyarchaeia	Un_Bathyarchaeia		0	0	0	0	0	0	0	0	0	0	0	0	0	0	0	0	0	0	0	0	0	0	0	41	0	0	0	0	0	0	0	0	0	0	0	0	0	0	0	0	0
A_ASV02790	Archaea	Crenarchaeota	Bathyarchaeia	Un_Bathyarchaeia	Un_Bathyarchaeia	Un_Bathyarchaeia	Un_Bathyarchaeia		0	0	0	0	0	0	0	0	0	0	0	0	0	0	0	0	0	0	0	0	0	0	0	0	0	0	0	0	0	0	0	0	0	0	0	41	0	0	0	0	0
A_ASV02769	Archaea	Crenarchaeota	Bathyarchaeia	Un_Bathyarchaeia	Un_Bathyarchaeia	Un_Bathyarchaeia	Un_Bathyarchaeia		0	0	0	0	0	0	0	0	0	0	0	0	0	0	34	0	7	0	0	0	0	0	0	0	0	0	0	0	0	0	0	0	0	0	0	0	0	0	0	0	0
A_ASV02784	Archaea	Crenarchaeota	Bathyarchaeia	Un_Bathyarchaeia	Un_Bathyarchaeia	Un_Bathyarchaeia	Un_Bathyarchaeia		0	0	0	0	0	0	0	0	0	0	0	0	0	0	0	0	0	0	0	0	0	0	0	0	0	0	0	0	0	0	23	0	0	18	0	0	0	0	0	0	0
A_ASV02785	Archaea	Halobacterota	Methanosarcinia	Methanosarciniales	Methanosaetaceae	Methanosaeta	Un_Methanosaeta		0	0	0	0	0	0	0	0	0	0	0	0	0	0	0	0	0	0	0	0	0	0	0	0	0	0	0	0	0	0	0	0	0	41	0	0	0	0	0	0	0
A_ASV02771	Archaea	Nanoarchaeota	Nanoarchaeia	Woesearchaeales	Un_Woesearchaeales	Un_Woesearchaeales	Un_Woesearchaeales		0	0	0	0	0	0	0	0	0	0	0	0	0	0	0	0	25	16	0	0	0	0	0	0	0	0	0	0	0	0	0	0	0	0	0	0	0	0	0	0	0
A_ASV02761	Archaea	Nanoarchaeota	Nanoarchaeia	Woesearchaeales	Un_Woesearchaeales	Un_Woesearchaeales	Un_Woesearchaeales		0	0	0	0	0	0	0	0	41	0	0	0	0	0	0	0	0	0	0	0	0	0	0	0	0	0	0	0	0	0	0	0	0	0	0	0	0	0	0	0	0
A_ASV02788	Archaea	Nanoarchaeota	Nanoarchaeia	Woesearchaeales	Un_Woesearchaeales	Un_Woesearchaeales	Un_Woesearchaeales		0	0	0	0	0	0	0	0	0	0	0	0	0	0	0	0	0	0	0	0	0	0	0	0	0	0	0	0	0	0	0	0	0	41	0	0	0	0	0	0	0
A_ASV02752	Archaea	Nanoarchaeota	Nanoarchaeia	Woesearchaeales	Un_Woesearchaeales	Un_Woesearchaeales	Un_Woesearchaeales		0	35	6	0	0	0	0	0	0	0	0	0	0	0	0	0	0	0	0	0	0	0	0	0	0	0	0	0	0	0	0	0	0	0	0	0	0	0	0	0	0
A_ASV02767	Archaea	Nanoarchaeota	Nanoarchaeia	Woesearchaeales	Un_Woesearchaeales	Un_Woesearchaeales	Un_Woesearchaeales		0	0	0	0	0	0	0	0	0	0	0	0	0	0	41	0	0	0	0	0	0	0	0	0	0	0	0	0	0	0	0	0	0	0	0	0	0	0	0	0	0
A_ASV02759	Archaea	Nanoarchaeota	Nanoarchaeia	Woesearchaeales	Un_Woesearchaeales	Un_Woesearchaeales	Un_Woesearchaeales		0	0	0	0	0	0	0	41	0	0	0	0	0	0	0	0	0	0	0	0	0	0	0	0	0	0	0	0	0	0	0	0	0	0	0	0	0	0	0	0	0
A_ASV02774	Archaea	Nanoarchaeota	Nanoarchaeia	Woesearchaeales	SCGC AAA286-E23	Un_SCGC AAA286-E23	Un_SCGC AAA286-E23		0	0	0	0	0	0	0	0	0	0	0	0	0	0	0	0	0	0	41	0	0	0	0	0	0	0	0	0	0	0	0	0	0	0	0	0	0	0	0	0	0
A_ASV02804	Archaea	Asgardarchaeota	Lokiarchaeia	Lokiarchaeia	Lokiarchaeia	Lokiarchaeia	Lokiarchaeia		0	0	0	0	0	0	0	40	0	0	0	0	0	0	0	0	0	0	0	0	0	0	0	0	0	0	0	0	0	0	0	0	0	0	0	0	0	0	0	0	0
A_ASV02840	Archaea	Asgardarchaeota	Odinarchaeia	Un_Odinarchaeia	Un_Odinarchaeia	Un_Odinarchaeia	Un_Odinarchaeia		0	0	0	0	0	0	0	0	0	0	0	0	0	0	0	0	0	0	0	0	0	0	0	0	0	0	0	0	0	0	0	0	0	0	0	0	0	0	0	0	0
A_ASV02801	Archaea	Crenarchaeota	Bathyarchaeia	Un_Bathyarchaeia	Un_Bathyarchaeia	Un_Bathyarchaeia	Un_Bathyarchaeia		0	0	0	0	0	0	40	0	0	0	0	0	0	0	0	0	0	0	0	0	0	0	0	0	0	0	0	0	0	0	0	0	0	0	0	0	0	0	0	0	0
A_ASV02821	Archaea	Crenarchaeota	Bathyarchaeia	Un_Bathyarchaeia	Un_Bathyarchaeia	Un_Bathyarchaeia	Un_Bathyarchaeia		0	0	0	0	0	0	0	0	0	0	0	0	0	0	0	0	0	0	40	0	0	0	0	0	0	0	0	0	0	0	0	0	0	0	0	0	0	0	0	0	0
A_ASV02822	Archaea	Crenarchaeota	Bathyarchaeia	Un_Bathyarchaeia	Un_Bathyarchaeia	Un_Bathyarchaeia	Un_Bathyarchaeia		0	0	0	0	0	0	0	0	0	0	0	0	0	0	0	0	0	0	40	0	0	0	0	0	0	0	0	0	0	0	0	0	0	0	0	0	0	0	0	0	0
A_ASV02836	Archaea	Crenarchaeota	Bathyarchaeia	Un_Bathyarchaeia	Un_Bathyarchaeia	Un_Bathyarchaeia	Un_Bathyarchaeia		0	0	0	0	0	0	0	0	0	0	0	0	0	0	0	0	0	0	0	0	0	0	0	0	0	0	0	0	0	0	0	0	0	0	0	40	0	0	0	0	0
A_ASV02841	Archaea	Crenarchaeota	Bathyarchaeia	Un_Bathyarchaeia	Un_Bathyarchaeia	Un_Bathyarchaeia	Un_Bathyarchaeia		0	0	0	0	0	0	0	0	0	0	0	0	0	0	0	0	0	0	0	0	0	0	0	0	0	0	0	0	0	0	0	0	0	0	0	0	0	0	0	0	0
A_ASV02837	Archaea	Crenarchaeota	Bathyarchaeia	Un_Bathyarchaeia	Un_Bathyarchaeia	Un_Bathyarchaeia	Un_Bathyarchaeia		0	0	0	0	0	0	0	0	0	0	0	0	0	0	0	0	0	0	0	0	0	0	0	0	0	0	0	0	0	0	0	0	0	0	0	40	0	0	0	0	0
A_ASV02838	Archaea	Crenarchaeota	Bathyarchaeia	Un_Bathyarchaeia	Un_Bathyarchaeia	Un_Bathyarchaeia	Un_Bathyarchaeia		0	0	0	0	0	0	0	0	0	0	0	0	0	0	0	0	0	0	0	0	0	0	0	0	0	0	0	0	0	0	0	0	0	0	0	0	0	0	0	40	0
A_ASV02809	Archaea	Crenarchaeota	Un_Crenarchaeota	Un_Crenarchaeota	Un_Crenarchaeota	Un_Crenarchaeota	Un_Crenarchaeota		0	0	0	0	0	0	0	0	40	0	0	0	0	0	0	0	0	0	0	0	0	0	0	0	0	0	0	0	0	0	0	0	0	0	0	0	0	0	0	0	0
A_ASV02814	Archaea	Nanoarchaeota	Nanoarchaeia	Woesearchaeales	GW2011_GWC1_47_15	Un_GW2011_GWC1_47_15	Un_GW2011_GWC1_47_15		0	0	0	0	0	0	0	0	0	0	0	0	40	0	0	0	0	0	0	0	0	0	0	0	0	0	0	0	0	0	0	0	0	0	0	0	0	0	0	0	0
A_ASV02803	Archaea	Nanoarchaeota	Nanoarchaeia	Woesearchaeales	Un_Woesearchaeales	Un_Woesearchaeales	Un_Woesearchaeales		0	0	0	0	0	0	0	40	0	0	0	0	0	0	0	0	0	0	0	0	0	0	0	0	0	0	0	0	0	0	0	0	0	0	0	0	0	0	0	0	0
A_ASV02816	Archaea	Nanoarchaeota	Nanoarchaeia	Woesearchaeales	Un_Woesearchaeales	Un_Woesearchaeales	Un_Woesearchaeales		0	0	0	0	0	0	0	0	0	0	0	0	0	0	40	0	0	0	0	0	0	0	0	0	0	0	0	0	0	0	0	0	0	0	0	0	0	0	0	0	0
A_ASV02819	Archaea	Nanoarchaeota	Nanoarchaeia	Woesearchaeales	Un_Woesearchaeales	Un_Woesearchaeales	Un_Woesearchaeales		0	0	0	0	0	0	0	0	0	0	0	0	0	0	0	40	0	0	0	0	0	0	0	0	0	0	0	0	0	0	0	0	0	0	0	0	0	0	0	0	0
A_ASV02826	Archaea	Nanoarchaeota	Nanoarchaeia	Woesearchaeales	Un_Woesearchaeales	Un_Woesearchaeales	Un_Woesearchaeales		0	0	0	0	0	0	0	0	0	0	0	0	0	0	0	0	0	0	0	0	0	0	0	0	0	0	0	40	0	0	0	0	0	0	0	0	0	0	0	0	0
A_ASV02828	Archaea	Nanoarchaeota	Nanoarchaeia	Woesearchaeales	Un_Woesearchaeales	Un_Woesearchaeales	Un_Woesearchaeales		0	0	0	0	0	0	0	0	0	0	0	0	0	0	0	0	0	0	0	0	0	0	0	0	0	0	0	40	0	0	0	0	0	0	0	0	0	0	0	0	0
A_ASV02830	Archaea	Nanoarchaeota	Nanoarchaeia	Woesearchaeales	Un_Woesearchaeales	Un_Woesearchaeales	Un_Woesearchaeales		0	0	0	0	0	0	0	0	0	0	0	0	0	0	0	0	0	0	0	0	0	0	0	0	0	0	0	0	10	18	12	0	0	0	0	0	0	0	0	0	0
A_ASV02842	Archaea	Nanoarchaeota	Nanoarchaeia	Woesearchaeales	Un_Woesearchaeales	Un_Woesearchaeales	Un_Woesearchaeales		0	0	0	0	0	0	0	0	0	0	0	0	0	0	0	0	0	0	0	0	0	0	0	0	0	0	0	0	0	0	0	0	0	0	0	0	0	0	0	0	0
A_ASV02824	Archaea	Nanoarchaeota	Nanoarchaeia	Woesearchaeales	Un_Woesearchaeales	Un_Woesearchaeales	Un_Woesearchaeales		0	0	0	0	0	0	0	0	0	0	0	0	0	0	0	0	0	0	40	0	0	0	0	0	0	0	0	0	0	0	0	0	0	0	0	0	0	0	0	0	0
A_ASV02813	Archaea	Nanoarchaeota	Nanoarchaeia	Woesearchaeales	SCGC AAA286-E23	Un_SCGC AAA286-E23	Un_SCGC AAA286-E23		0	0	0	0	0	0	0	0	0	0	0	40	0	0	0	0	0	0	0	0	0	0	0	0	0	0	0	0	0	0	0	0	0	0	0	0	0	0	0	0	0
A_ASV02800	Archaea	Thermoplasmatota	Thermoplasmata	Marine Benthic Group D and DHVEG-1	Un_Marine Benthic Group D and DHVEG-1	Un_Marine Benthic Group D and DHVEG-1	Un_Marine Benthic Group D and DHVEG-1		0	0	0	0	0	0	40	0	0	0	0	0	0	0	0	0	0	0	0	0	0	0	0	0	0	0	0	0	0	0	0	0	0	0	0	0	0	0	0	0	0
A_ASV02808	Archaea	Thermoplasmatota	Thermoplasmata	Marine Benthic Group D and DHVEG-1	Un_Marine Benthic Group D and DHVEG-1	Un_Marine Benthic Group D and DHVEG-1	Un_Marine Benthic Group D and DHVEG-1		0	0	0	0	0	0	0	0	40	0	0	0	0	0	0	0	0	0	0	0	0	0	0	0	0	0	0	0	0	0	0	0	0	0	0	0	0	0	0	0	0
A_ASV02843	Archaea	Thermoplasmatota	Thermoplasmata	Marine Benthic Group D and DHVEG-1	Un_Marine Benthic Group D and DHVEG-1	Un_Marine Benthic Group D and DHVEG-1	Un_Marine Benthic Group D and DHVEG-1		0	0	0	0	0	0	0	0	0	0	0	0	0	0	0	0	0	0	0	0	0	0	0	0	0	0	0	0	0	0	0	0	0	0	0	0	0	0	0	0	0
A_ASV02799	Archaea	Thermoplasmatota	Thermoplasmata	Un_Thermoplasmata	Un_Thermoplasmata	Un_Thermoplasmata	Un_Thermoplasmata		0	0	0	40	0	0	0	0	0	0	0	0	0	0	0	0	0	0	0	0	0	0	0	0	0	0	0	0	0	0	0	0	0	0	0	0	0	0	0	0	0
A_ASV02857	Archaea	Asgardarchaeota	Odinarchaeia	Un_Odinarchaeia	Un_Odinarchaeia	Un_Odinarchaeia	Un_Odinarchaeia		0	0	0	0	39	0	0	0	0	0	0	0	0	0	0	0	0	0	0	0	0	0	0	0	0	0	0	0	0	0	0	0	0	0	0	0	0	0	0	0	0
A_ASV02861	Archaea	Crenarchaeota	Bathyarchaeia	Un_Bathyarchaeia	Un_Bathyarchaeia	Un_Bathyarchaeia	Un_Bathyarchaeia		0	0	0	0	0	0	0	39	0	0	0	0	0	0	0	0	0	0	0	0	0	0	0	0	0	0	0	0	0	0	0	0	0	0	0	0	0	0	0	0	0
A_ASV02867	Archaea	Crenarchaeota	Bathyarchaeia	Un_Bathyarchaeia	Un_Bathyarchaeia	Un_Bathyarchaeia	Un_Bathyarchaeia		0	0	0	0	0	0	0	0	39	0	0	0	0	0	0	0	0	0	0	0	0	0	0	0	0	0	0	0	0	0	0	0	0	0	0	0	0	0	0	0	0
A_ASV02872	Archaea	Crenarchaeota	Bathyarchaeia	Un_Bathyarchaeia	Un_Bathyarchaeia	Un_Bathyarchaeia	Un_Bathyarchaeia		0	0	0	0	0	0	0	0	0	0	0	0	39	0	0	0	0	0	0	0	0	0	0	0	0	0	0	0	0	0	0	0	0	0	0	0	0	0	0	0	0
A_ASV02897	Archaea	Crenarchaeota	Bathyarchaeia	Un_Bathyarchaeia	Un_Bathyarchaeia	Un_Bathyarchaeia	Un_Bathyarchaeia		0	0	0	0	0	0	0	0	0	0	0	0	0	0	0	0	0	0	0	0	0	0	0	0	0	0	0	0	0	0	0	0	0	0	0	0	0	0	0	0	39
A_ASV02900	Archaea	Crenarchaeota	Bathyarchaeia	Un_Bathyarchaeia	Un_Bathyarchaeia	Un_Bathyarchaeia	Un_Bathyarchaeia		0	0	0	0	0	0	0	0	0	0	0	0	0	0	0	0	0	0	0	0	0	0	0	0	0	0	0	0	0	0	0	0	0	0	0	0	0	0	0	0	0
A_ASV02892	Archaea	Crenarchaeota	Nitrososphaeria	Caldiarchaeales	Geothermarchaeaceae	Un_Geothermarchaeaceae	Un_Geothermarchaeaceae		0	0	0	0	0	0	0	0	0	0	0	0	0	0	0	0	0	0	0	0	0	0	0	0	0	0	0	0	0	0	0	0	0	0	0	39	0	0	0	0	0
A_ASV02862	Archaea	Crenarchaeota	Nitrososphaeria	Marine Benthic Group A	Un_Marine Benthic Group A	Un_Marine Benthic Group A	Un_Marine Benthic Group A		0	0	0	0	0	0	0	39	0	0	0	0	0	0	0	0	0	0	0	0	0	0	0	0	0	0	0	0	0	0	0	0	0	0	0	0	0	0	0	0	0
A_ASV02882	Archaea	Crenarchaeota	Nitrososphaeria	Nitrosopumilales	Nitrosopumilaceae	Candidatus Nitrosopumilus	Un_Candidatus Nitrosopumilus		0	0	0	0	0	0	0	0	0	0	0	0	0	0	0	0	0	0	39	0	0	0	0	0	0	0	0	0	0	0	0	0	0	0	0	0	0	0	0	0	0
A_ASV02895	Archaea	Crenarchaeota	Nitrososphaeria	Nitrosopumilales	Nitrosopumilaceae	Candidatus Nitrosopumilus	Un_Candidatus Nitrosopumilus		0	0	0	0	0	0	0	0	0	0	0	0	0	0	0	0	0	0	0	0	0	0	0	0	0	0	0	0	0	0	0	0	0	0	0	0	0	0	0	39	0
A_ASV02888	Archaea	Halobacterota	Methanocellia	Methanocellales	Methanocellaceae	Rice Cluster I	Un_Rice Cluster I		0	0	0	0	0	0	0	0	0	0	0	0	0	0	0	0	0	0	0	0	0	0	0	0	0	0	0	0	0	0	0	0	39	0	0	0	0	0	0	0	0
A_ASV02864	Archaea	Halobacterota	Methanosarcinia	Methanosarciniales	Syntrophoarchaeaceae	Un_Candidatus Syntrophoarchaeum	Un_Candidatus Syntrophoarchaeum		0	0	0	0	0	0	0	0	39	0	0	0	0	0	0	0	0	0	0	0	0	0	0	0	0	0	0	0	0	0	0	0	0	0	0	0	0	0	0	0	0
A_ASV02846	Archaea	Hydrothermarchaeota	Hydrothermarchaeia	Hydrothermarchaeales	Un_Hydrothermarchaeales	Un_Hydrothermarchaeales	Un_Hydrothermarchaeales		39	0	0	0	0	0	0	0	0	0	0	0	0	0	0	0	0	0	0	0	0	0	0	0	0	0	0	0	0	0	0	0	0	0	0	0	0	0	0	0	0
A_ASV02896	Archaea	Un_Archaea	Un_Archaea	Un_Archaea	Un_Archaea	Un_Archaea	Un_Archaea		0	0	0	0	0	0	0	0	0	0	0	0	0	0	0	0	0	0	0	0	0	0	0	0	0	0	0	0	0	0	0	0	0	0	0	0	0	0	0	39	0
A_ASV02858	Archaea	Nanoarchaeota	Nanoarchaeia	Woesearchaeales	Un_Woesearchaeales	Un_Woesearchaeales	Un_Woesearchaeales		0	0	0	0	15	0	0	0	0	0	0	0	11	0	0	0	13	0	0	0	0	0	0	0	0	0	0	0	0	0	0	0	0	0	0	0	0	0	0	0	0
A_ASV02868	Archaea	Nanoarchaeota	Nanoarchaeia	Woesearchaeales	Un_Woesearchaeales	Un_Woesearchaeales	Un_Woesearchaeales		0	0	0	0	0	0	0	0	0	0	20	0	0	19	0	0	0	0	0	0	0	0	0	0	0	0	0	0	0	0	0	0	0	0	0	0	0	0	0	0	0
A_ASV02870	Archaea	Nanoarchaeota	Nanoarchaeia	Woesearchaeales	Un_Woesearchaeales	Un_Woesearchaeales	Un_Woesearchaeales		0	0	0	0	0	0	0	0	0	0	0	11	0	0	0	0	0	0	0	0	0	0	0	0	0	0	0	0	0	0	28	0	0	0	0	0	0	0	0	0	0
A_ASV02848	Archaea	Nanoarchaeota	Nanoarchaeia	Woesearchaeales	Un_Woesearchaeales	Un_Woesearchaeales	Un_Woesearchaeales		39	0	0	0	0	0	0	0	0	0	0	0	0	0	0	0	0	0	0	0	0	0	0	0	0	0	0	0	0	0	0	0	0	0	0	0	0	0	0	0	0
A_ASV02853	Archaea	Nanoarchaeota	Nanoarchaeia	Woesearchaeales	Un_Woesearchaeales	Un_Woesearchaeales	Un_Woesearchaeales		0	0	23	0	0	0	0	0	0	0	0	0	0	0	0	0	0	0	0	0	0	0	0	0	0	0	0	0	0	0	0	0	0	0	0	0	0	16	0	0	0
A_ASV02863	Archaea	Nanoarchaeota	Nanoarchaeia	Woesearchaeales	Un_Woesearchaeales	Un_Woesearchaeales	Un_Woesearchaeales		0	0	0	0	0	0	0	0	39	0	0	0	0	0	0	0	0	0	0	0	0	0	0	0	0	0	0	0	0	0	0	0	0	0	0	0	0	0	0	0	0
A_ASV02871	Archaea	Nanoarchaeota	Nanoarchaeia	Woesearchaeales	Un_Woesearchaeales	Un_Woesearchaeales	Un_Woesearchaeales		0	0	0	0	0	0	0	0	0	0	0	0	39	0	0	0	0	0	0	0	0	0	0	0	0	0	0	0	0	0	0	0	0	0	0	0	0	0	0	0	0
A_ASV02879	Archaea	Nanoarchaeota	Nanoarchaeia	Woesearchaeales	Un_Woesearchaeales	Un_Woesearchaeales	Un_Woesearchaeales		0	0	0	0	0	0	0	0	0	0	0	0	0	0	0	39	0	0	0	0	0	0	0	0	0	0	0	0	0	0	0	0	0	0	0	0	0	0	0	0	0
A_ASV02880	Archaea	Thermoplasmatota	Thermoplasmata	Marine Benthic Group D and DHVEG-1	Un_Marine Benthic Group D and DHVEG-1	Un_Marine Benthic Group D and DHVEG-1	Un_Marine Benthic Group D and DHVEG-1		0	0	0	0	0	0	0	0	0	0	0	0	0	0	0	0	1	0	0	0	0	0	0	0	0	0	0	0	25	13	0	0	0	0	0	0	0	0	0	0	0
A_ASV02876	Archaea	Thermoplasmatota	Thermoplasmata	Un_Thermoplasmata	Un_Thermoplasmata	Un_Thermoplasmata	Un_Thermoplasmata		0	0	0	0	0	0	0	0	0	0	0	0	0	0	39	0	0	0	0	0	0	0	0	0	0	0	0	0	0	0	0	0	0	0	0	0	0	0	0	0	0
A_ASV02866	Archaea	Thermoplasmatota	Thermoplasmata	SG8-5	Un_SG8-5	Un_SG8-5	Un_SG8-5		0	0	0	0	0	0	0	0	39	0	0	0	0	0	0	0	0	0	0	0	0	0	0	0	0	0	0	0	0	0	0	0	0	0	0	0	0	0	0	0	0
A_ASV02946	Archaea	Asgardarchaeota	Lokiarchaeia	Lokiarchaeia	Lokiarchaeia	Lokiarchaeia	Lokiarchaeia		0	0	0	0	0	0	0	0	0	0	0	0	0	0	0	0	0	0	0	0	0	0	0	0	0	0	0	0	0	0	0	0	0	38	0	0	0	0	0	0	0
A_ASV02965	Archaea	Asgardarchaeota	Un_Asgardarchaeota	Un_Asgardarchaeota	Un_Asgardarchaeota	Un_Asgardarchaeota	Un_Asgardarchaeota		0	0	0	0	0	0	0	0	0	0	0	0	0	0	0	0	0	0	0	0	0	0	0	0	0	0	0	0	0	0	0	0	0	0	0	0	0	0	0	0	0
A_ASV02963	Archaea	Asgardarchaeota	Odinarchaeia	Un_Odinarchaeia	Un_Odinarchaeia	Un_Odinarchaeia	Un_Odinarchaeia		0	0	0	0	0	0	0	0	0	0	0	0	0	0	0	0	0	0	0	0	0	0	0	0	0	0	0	0	0	0	0	0	0	0	0	0	0	0	0	0	0
A_ASV02934	Archaea	Asgardarchaeota	Odinarchaeia	Un_Odinarchaeia	Un_Odinarchaeia	Un_Odinarchaeia	Un_Odinarchaeia		0	0	0	0	0	0	0	0	0	0	0	0	0	0	0	0	0	0	0	0	0	0	0	0	0	38	0	0	0	0	0	0	0	0	0	0	0	0	0	0	0
A_ASV02962	Archaea	Asgardarchaeota	Odinarchaeia	Un_Odinarchaeia	Un_Odinarchaeia	Un_Odinarchaeia	Un_Odinarchaeia		0	0	0	0	0	0	0	0	0	0	0	0	0	0	0	0	0	0	0	0	0	0	0	0	0	0	0	0	0	0	0	0	0	0	0	0	0	0	0	0	0
A_ASV02936	Archaea	Crenarchaeota	Bathyarchaeia	Un_Bathyarchaeia	Un_Bathyarchaeia	Un_Bathyarchaeia	Un_Bathyarchaeia		0	0	0	0	0	0	0	0	0	0	0	0	0	0	0	0	0	0	0	0	0	0	0	0	0	0	0	0	38	0	0	0	0	0	0	0	0	0	0	0	0
A_ASV02942	Archaea	Crenarchaeota	Bathyarchaeia	Un_Bathyarchaeia	Un_Bathyarchaeia	Un_Bathyarchaeia	Un_Bathyarchaeia		0	0	0	0	0	0	0	0	0	0	0	0	0	0	0	0	0	0	0	0	0	0	0	0	0	0	0	0	0	0	0	0	0	38	0	0	0	0	0	0	0
A_ASV02958	Archaea	Crenarchaeota	Bathyarchaeia	Un_Bathyarchaeia	Un_Bathyarchaeia	Un_Bathyarchaeia	Un_Bathyarchaeia		0	0	0	0	0	0	0	0	0	0	0	0	0	0	0	0	0	0	0	0	0	0	0	0	0	0	0	0	0	0	0	0	0	0	0	0	0	0	0	0	38
A_ASV02961	Archaea	Crenarchaeota	Bathyarchaeia	Un_Bathyarchaeia	Un_Bathyarchaeia	Un_Bathyarchaeia	Un_Bathyarchaeia		0	0	0	0	0	0	0	0	0	0	0	0	0	0	0	0	0	0	0	0	0	0	0	0	0	0	0	0	0	0	0	0	0	0	0	0	0	0	0	0	0
A_ASV02911	Archaea	Crenarchaeota	Bathyarchaeia	Un_Bathyarchaeia	Un_Bathyarchaeia	Un_Bathyarchaeia	Un_Bathyarchaeia		0	0	0	0	0	0	0	0	38	0	0	0	0	0	0	0	0	0	0	0	0	0	0	0	0	0	0	0	0	0	0	0	0	0	0	0	0	0	0	0	0
A_ASV02912	Archaea	Crenarchaeota	Bathyarchaeia	Un_Bathyarchaeia	Un_Bathyarchaeia	Un_Bathyarchaeia	Un_Bathyarchaeia		0	0	0	0	0	0	0	0	13	0	0	0	0	0	0	0	0	0	0	0	0	0	0	0	0	0	0	0	0	0	0	0	0	0	0	0	0	0	0	0	0
A_ASV02943	Archaea	Crenarchaeota	Bathyarchaeia	Un_Bathyarchaeia	Un_Bathyarchaeia	Un_Bathyarchaeia	Un_Bathyarchaeia		0	0	0	0	0	0	0	0	0	0	0	0	0	0	0	0	0	0	0	0	0	0	0	0	0	0	0	0	0	0	0	0	0	38	0	0	0	0	0	0	0
A_ASV02964	Archaea	Crenarchaeota	Bathyarchaeia	Un_Bathyarchaeia	Un_Bathyarchaeia	Un_Bathyarchaeia	Un_Bathyarchaeia		0	0	0	0	0	0	0	0	0	0	0	0	0	0	0	0	0	0	0	0	0	0	0	0	0	0	0	0	0	0	0	0	0	0	0	0	0	0	0	0	0
A_ASV02939	Archaea	Halobacterota	Methanosarcinia	Methanosarciniales	Methanosaetaceae	Methanosaeta	Un_Methanosaeta		0	0	0	0	0	0	0	0	0	0	0	0	0	0	0	0	0	0	0	0	0	0	0	0	0	0	0	0	0	0	24	0	14	0	0	0	0	0	0	0	0
A_ASV02959	Archaea	Hydrothermarchaeota	Hydrothermarchaeia	Hydrothermarchaeales	Un_Hydrothermarchaeales	Un_Hydrothermarchaeales	Un_Hydrothermarchaeales		0	0	0	0	0	0	0	0	0	0	0	0	0	0	0	0	0	0	0	0	0	0	0	0	0	0	0	0	0	0	0	0	0	0	0	0	0	0	0	0	0
A_ASV02901	Archaea	Un_Archaea	Un_Archaea	Un_Archaea	Un_Archaea	Un_Archaea	Un_Archaea		38	0	0	0	0	0	0	0	0	0	0	0	0	0	0	0	0	0	0	0	0	0	0	0	0	0	0	0	0	0	0	0	0	0	0	0	0	0	0	0	0
A_ASV02910	Archaea	Nanoarchaeota	Nanoarchaeia	Woesearchaeales	GW2011_GWC1_47_15	Un_GW2011_GWC1_47_15	Un_GW2011_GWC1_47_15		0	0	0	0	0	0	0	0	38	0	0	0	0	0	0	0	0	0	0	0	0	0	0	0	0	0	0	0	0	0	0	0	0	0	0	0	0	0	0	0	0
A_ASV02960	Archaea	Nanoarchaeota	Nanoarchaeia	Woesearchaeales	Un_Woesearchaeales	Un_Woesearchaeales	Un_Woesearchaeales		0	0	0	0	0	0	0	0	0	0	0	0	0	0	0	0	0	0	0	0	0	0	0	0	0	0	0	0	0	0	0	0	0	0	0	0	0	0	0	0	0
A_ASV02915	Archaea	Nanoarchaeota	Nanoarchaeia	Woesearchaeales	Un_Woesearchaeales	Un_Woesearchaeales	Un_Woesearchaeales		0	0	0	0	0	0	0	0	0	0	7	0	15	0	16	0	0	0	0	0	0	0	0	0	0	0	0	0	0	0	0	0	0	0	0	0	0	0	0	0	0
A_ASV02955	Archaea	Nanoarchaeota	Nanoarchaeia	Woesearchaeales	Un_Woesearchaeales	Un_Woesearchaeales	Un_Woesearchaeales		0	0	0	0	0	0	0	0	0	0	0	0	0	0	0	0	0	0	0	0	0	0	0	0	0	0	0	0	0	0	0	0	0	0	0	0	0	0	38	0	0
A_ASV02903	Archaea	Nanoarchaeota	Nanoarchaeia	Woesearchaeales	Un_Woesearchaeales	Un_Woesearchaeales	Un_Woesearchaeales		17	0	0	0	0	0	0	0	0	0	0	0	0	0	0	0	0	0	0	0	0	0	0	0	0	0	0	0	0	0	0	0	0	0	0	0	21	0	0	0	0
A_ASV02905	Archaea	Nanoarchaeota	Nanoarchaeia	Woesearchaeales	Un_Woesearchaeales	Un_Woesearchaeales	Un_Woesearchaeales		0	0	0	25	13	0	0	0	0	0	0	0	0	0	0	0	0	0	0	0	0	0	0	0	0	0	0	0	0	0	0	0	0	0	0	0	0	0	0	0	0
A_ASV02918	Archaea	Nanoarchaeota	Nanoarchaeia	Woesearchaeales	Un_Woesearchaeales	Un_Woesearchaeales	Un_Woesearchaeales		0	0	0	0	0	0	0	0	0	0	0	38	0	0	0	0	0	0	0	0	0	0	0	0	0	0	0	0	0	0	0	0	0	0	0	0	0	0	0	0	0
A_ASV02919	Archaea	Nanoarchaeota	Nanoarchaeia	Woesearchaeales	Un_Woesearchaeales	Un_Woesearchaeales	Un_Woesearchaeales		0	0	0	0	0	0	0	0	0	0	0	18	0	20	0	0	0	0	0	0	0	0	0	0	0	0	0	0	0	0	0	0	0	0	0	0	0	0	0	0	0
A_ASV02923	Archaea	Nanoarchaeota	Nanoarchaeia	Woesearchaeales	Un_Woesearchaeales	Un_Woesearchaeales	Un_Woesearchaeales		0	0	0	0	0	0	0	0	0	0	0	0	22	0	16	0	0	0	0	0	0	0	0	0	0	0	0	0	0	0	0	0	0	0	0	0	0	0	0	0	0
A_ASV02924	Archaea	Nanoarchaeota	Nanoarchaeia	Woesearchaeales	Un_Woesearchaeales	Un_Woesearchaeales	Un_Woesearchaeales		0	0	0	0	0	0	0	0	0	0	0	0	0	38	0	0	0	0	0	0	0	0	0	0	0	0	0	0	0	0	0	0	0	0	0	0	0	0	0	0	0
A_ASV02933	Archaea	Nanoarchaeota	Nanoarchaeia	Woesearchaeales	Un_Woesearchaeales	Un_Woesearchaeales	Un_Woesearchaeales		0	0	0	0	0	0	0	0	0	0	0	0	0	0	0	0	0	0	38	0	0	0	0	0	0	0	0	0	0	0	0	0	0	0	0	0	0	0	0	0	0
A_ASV02941	Archaea	Nanoarchaeota	Nanoarchaeia	Woesearchaeales	Un_Woesearchaeales	Un_Woesearchaeales	Un_Woesearchaeales		0	0	0	0	0	0	0	0	0	0	0	0	0	0	0	0	0	0	0	0	0	0	0	0	0	0	0	0	0	0	0	38	0	0	0	0	0	0	0	0	0
A_ASV02953	Archaea	Nanoarchaeota	Nanoarchaeia	Woesearchaeales	Un_Woesearchaeales	Un_Woesearchaeales	Un_Woesearchaeales		0	0	0	0	0	0	0	0	0	0	0	0	0	0	0	0	0	0	0	0	0	0	0	0	0	0	0	0	0	0	0	0	0	0	0	0	0	17	0	0	16
A_ASV02956	Archaea	Nanoarchaeota	Nanoarchaeia	Woesearchaeales	Un_Woesearchaeales	Un_Woesearchaeales	Un_Woesearchaeales		0	0	0	0	0	0	0	0	0	0	0	0	0	0	0	0	0	0	0	0	0	0	0	0	0	0	0	0	0	0	0	0	0	0	0	0	0	0	0	38	0
A_ASV02954	Archaea	Nanoarchaeota	Nanoarchaeia	Woesearchaeales	Un_Woesearchaeales	Un_Woesearchaeales	Un_Woesearchaeales		0	0	0	0	0	0	0	0	0	0	0	0	0	0	0	0	0	0	0	0	0	0	0	0	0	0	0	0	0	0	0	0	0	0	0	0	0	0	38	0	0
A_ASV02931	Archaea	Nanoarchaeota	Nanoarchaeia	Woesearchaeales	Un_Woesearchaeales	Un_Woesearchaeales	Un_Woesearchaeales		0	0	0	0	0	0	0	0	0	0	0	0	0	0	0	0	0	0	38	0	0	0	0	0	0	0	0	0	0	0	0	0	0	0	0	0	0	0	0	0	0
A_ASV02921	Archaea	Thermoplasmatota	Thermoplasmata	Marine Benthic Group D and DHVEG-1	Un_Marine Benthic Group D and DHVEG-1	Un_Marine Benthic Group D and DHVEG-1	Un_Marine Benthic Group D and DHVEG-1		0	0	0	0	0	0	0	0	0	0	0	0	38	0	0	0	0	0	0	0	0	0	0	0	0	0	0	0	0	0	0	0	0	0	0	0	0	0	0	0	0
A_ASV02906	Archaea	Thermoplasmatota	Thermoplasmata	Un_Thermoplasmata	Un_Thermoplasmata	Un_Thermoplasmata	Un_Thermoplasmata		0	0	0	0	38	0	0	0	0	0	0	0	0	0	0	0	0	0	0	0	0	0	0	0	0	0	0	0	0	0	0	0	0	0	0	0	0	0	0	0	0
A_ASV02922	Archaea	Thermoplasmatota	Thermoplasmata	Un_Thermoplasmata	Un_Thermoplasmata	Un_Thermoplasmata	Un_Thermoplasmata		0	0	0	0	0	0	0	0	0	0	0	0	25	0	13	0	0	0	0	0	0	0	0	0	0	0	0	0	0	0	0	0	0	0	0	0	0	0	0	0	0
A_ASV02973	Archaea	Asgardarchaeota	Lokiarchaeia	Lokiarchaeia	Lokiarchaeia	Lokiarchaeia	Lokiarchaeia		0	0	0	0	0	0	37	0	0	0	0	0	0	0	0	0	0	0	0	0	0	0	0	0	0	0	0	0	0	0	0	0	0	0	0	0	0	0	0	0	0
A_ASV02972	Archaea	Crenarchaeota	Bathyarchaeia	Un_Bathyarchaeia	Un_Bathyarchaeia	Un_Bathyarchaeia	Un_Bathyarchaeia		0	0	0	0	25	0	0	0	0	12	0	0	0	0	0	0	0	0	0	0	0	0	0	0	0	0	0	0	0	0	0	0	0	0	0	0	0	0	0	0	0
A_ASV03006	Archaea	Crenarchaeota	Bathyarchaeia	Un_Bathyarchaeia	Un_Bathyarchaeia	Un_Bathyarchaeia	Un_Bathyarchaeia		0	0	0	0	0	0	0	0	0	0	0	0	0	0	0	0	0	0	0	0	0	0	0	0	0	0	0	0	0	0	0	0	0	37	0	0	0	0	0	0	0
A_ASV03007	Archaea	Crenarchaeota	Bathyarchaeia	Un_Bathyarchaeia	Un_Bathyarchaeia	Un_Bathyarchaeia	Un_Bathyarchaeia		0	0	0	0	0	0	0	0	0	0	0	0	0	0	0	0	0	0	0	0	0	0	0	0	0	0	0	0	0	0	0	0	0	37	0	0	0	0	0	0	0
A_ASV03012	Archaea	Crenarchaeota	Bathyarchaeia	Un_Bathyarchaeia	Un_Bathyarchaeia	Un_Bathyarchaeia	Un_Bathyarchaeia		0	0	0	0	0	0	0	0	0	0	0	0	0	0	0	0	0	0	0	0	0	0	0	0	0	0	0	0	0	0	0	0	0	0	0	0	0	0	0	37	0
A_ASV03013	Archaea	Crenarchaeota	Bathyarchaeia	Un_Bathyarchaeia	Un_Bathyarchaeia	Un_Bathyarchaeia	Un_Bathyarchaeia		0	0	0	0	0	0	0	0	0	0	0	0	0	0	0	0	0	0	0	0	0	0	0	0	0	0	0	0	0	0	0	0	0	0	0	0	0	0	0	37	0
A_ASV03014	Archaea	Crenarchaeota	Bathyarchaeia	Un_Bathyarchaeia	Un_Bathyarchaeia	Un_Bathyarchaeia	Un_Bathyarchaeia		0	0	0	0	0	0	0	0	0	0	0	0	0	0	0	0	0	0	0	0	0	0	0	0	0	0	0	0	0	0	0	0	0	0	0	0	0	0	0	0	37
A_ASV03009	Archaea	Crenarchaeota	Nitrososphaeria	Nitrososphaerales	Nitrososphaeraceae	Un_Nitrososphaeraceae	Un_Nitrososphaeraceae		0	0	0	0	0	0	0	0	0	0	0	0	0	0	0	0	0	0	0	0	0	0	0	0	0	0	0	0	0	0	0	0	0	0	37	0	0	0	0	0	0
A_ASV03001	Archaea	Halobacterota	Methanocellia	Methanocellales	Methanocellaceae	Rice Cluster I	Un_Rice Cluster I		0	0	0	0	0	0	0	0	0	0	0	0	0	0	0	0	0	0	0	0	0	0	0	0	0	0	0	0	0	37	0	0	0	0	0	0	0	0	0	0	0
A_ASV02978	Archaea	Un_Archaea	Un_Archaea	Un_Archaea	Un_Archaea	Un_Archaea	Un_Archaea		0	0	0	0	0	0	0	37	0	0	0	0	0	0	0	0	0	0	0	0	0	0	0	0	0	0	0	0	0	0	0	0	0	0	0	0	0	0	0	0	0
A_ASV02996	Archaea	Nanoarchaeota	Nanoarchaeia	Woesearchaeales	GW2011	AR15	Un_AR15		0	0	0	0	0	0	0	0	0	0	0	0	0	0	0	0	0	0	37	0	0	0	0	0	0	0	0	0	0	0	0	0	0	0	0	0	0	0	0	0	0
A_ASV02985	Archaea	Nanoarchaeota	Nanoarchaeia	Woesearchaeales	GW2011_GWC1_47_15	Un_GW2011_GWC1_47_15	Un_GW2011_GWC1_47_15		0	0	0	0	0	0	0	0	0	15	0	22	0	0	0	0	0	0	0	0	0	0	0	0	0	0	0	0	0	0	0	0	0	0	0	0	0	0	0	0	0
A_ASV03002	Archaea	Nanoarchaeota	Nanoarchaeia	Woesearchaeales	Un_Woesearchaeales	Un_Woesearchaeales	Un_Woesearchaeales		0	0	0	0	0	0	0	0	0	0	0	0	0	0	0	0	0	0	0	0	0	0	0	0	0	0	0	0	0	0	37	0	0	0	0	0	0	0	0	0	0
A_ASV02968	Archaea	Nanoarchaeota	Nanoarchaeia	Woesearchaeales	Un_Woesearchaeales	Un_Woesearchaeales	Un_Woesearchaeales		0	20	0	0	0	0	17	0	0	0	0	0	0	0	0	0	0	0	0	0	0	0	0	0	0	0	0	0	0	0	0	0	0	0	0	0	0	0	0	0	0
A_ASV02971	Archaea	Nanoarchaeota	Nanoarchaeia	Woesearchaeales	Un_Woesearchaeales	Un_Woesearchaeales	Un_Woesearchaeales		0	0	0	37	0	0	0	0	0	0	0	0	0	0	0	0	0	0	0	0	0	0	0	0	0	0	0	0	0	0	0	0	0	0	0	0	0	0	0	0	0
A_ASV02981	Archaea	Nanoarchaeota	Nanoarchaeia	Woesearchaeales	Un_Woesearchaeales	Un_Woesearchaeales	Un_Woesearchaeales		0	0	0	0	0	0	0	37	0	0	0	0	0	0	0	0	0	0	0	0	0	0	0	0	0	0	0	0	0	0	0	0	0	0	0	0	0	0	0	0	0
A_ASV02986	Archaea	Nanoarchaeota	Nanoarchaeia	Woesearchaeales	Un_Woesearchaeales	Un_Woesearchaeales	Un_Woesearchaeales		0	0	0	0	0	0	0	0	0	0	37	0	0	0	0	0	0	0	0	0	0	0	0	0	0	0	0	0	0	0	0	0	0	0	0	0	0	0	0	0	0
A_ASV02989	Archaea	Nanoarchaeota	Nanoarchaeia	Woesearchaeales	Un_Woesearchaeales	Un_Woesearchaeales	Un_Woesearchaeales		0	0	0	0	0	0	0	0	0	0	0	0	0	27	0	0	0	0	0	0	0	0	0	0	0	0	0	0	0	0	10	0	0	0	0	0	0	0	0	0	0
A_ASV02993	Archaea	Nanoarchaeota	Nanoarchaeia	Woesearchaeales	Un_Woesearchaeales	Un_Woesearchaeales	Un_Woesearchaeales		0	0	0	0	0	0	0	0	0	0	0	0	0	0	0	0	0	0	37	0	0	0	0	0	0	0	0	0	0	0	0	0	0	0	0	0	0	0	0	0	0
A_ASV02995	Archaea	Nanoarchaeota	Nanoarchaeia	Woesearchaeales	Un_Woesearchaeales	Un_Woesearchaeales	Un_Woesearchaeales		0	0	0	0	0	0	0	0	0	0	0	0	0	0	0	0	0	0	37	0	0	0	0	0	0	0	0	0	0	0	0	0	0	0	0	0	0	0	0	0	0
A_ASV03003	Archaea	Nanoarchaeota	Nanoarchaeia	Woesearchaeales	Un_Woesearchaeales	Un_Woesearchaeales	Un_Woesearchaeales		0	0	0	0	0	0	0	0	0	0	0	0	0	0	0	0	0	0	0	0	0	0	0	0	0	0	0	0	0	0	0	37	0	0	0	0	0	0	0	0	0
A_ASV03004	Archaea	Nanoarchaeota	Nanoarchaeia	Woesearchaeales	Un_Woesearchaeales	Un_Woesearchaeales	Un_Woesearchaeales		0	0	0	0	0	0	0	0	0	0	0	0	0	0	0	0	0	0	0	0	0	0	0	0	0	0	0	0	0	0	0	37	0	0	0	0	0	0	0	0	0
A_ASV03005	Archaea	Nanoarchaeota	Nanoarchaeia	Woesearchaeales	Un_Woesearchaeales	Un_Woesearchaeales	Un_Woesearchaeales		0	0	0	0	0	0	0	0	0	0	0	0	0	0	0	0	0	0	0	0	0	0	0	0	0	0	0	0	0	0	0	0	37	0	0	0	0	0	0	0	0
A_ASV03011	Archaea	Nanoarchaeota	Nanoarchaeia	Woesearchaeales	Un_Woesearchaeales	Un_Woesearchaeales	Un_Woesearchaeales		0	0	0	0	0	0	0	0	0	0	0	0	0	0	0	0	0	0	0	0	0	0	0	0	0	0	0	0	0	0	0	0	0	0	0	0	0	0	37	0	0
A_ASV02966	Archaea	Nanoarchaeota	Nanoarchaeia	Woesearchaeales	SCGC AAA286-E23	Un_SCGC AAA286-E23	Un_SCGC AAA286-E23		2	35	0	0	0	0	0	0	0	0	0	0	0	0	0	0	0	0	0	0	0	0	0	0	0	0	0	0	0	0	0	0	0	0	0	0	0	0	0	0	0
A_ASV02977	Archaea	Thermoplasmatota	Thermoplasmata	Marine Benthic Group D and DHVEG-1	Un_Marine Benthic Group D and DHVEG-1	Un_Marine Benthic Group D and DHVEG-1	Un_Marine Benthic Group D and DHVEG-1		0	0	0	0	0	0	0	37	0	0	0	0	0	0	0	0	0	0	0	0	0	0	0	0	0	0	0	0	0	0	0	0	0	0	0	0	0	0	0	0	0
A_ASV02979	Archaea	Thermoplasmatota	Thermoplasmata	Marine Benthic Group D and DHVEG-1	Un_Marine Benthic Group D and DHVEG-1	Un_Marine Benthic Group D and DHVEG-1	Un_Marine Benthic Group D and DHVEG-1		0	0	0	0	0	0	0	37	0	0	0	0	0	0	0	0	0	0	0	0	0	0	0	0	0	0	0	0	0	0	0	0	0	0	0	0	0	0	0	0	0
A_ASV02982	Archaea	Thermoplasmatota	Thermoplasmata	Un_Thermoplasmata	Un_Thermoplasmata	Un_Thermoplasmata	Un_Thermoplasmata		0	0	0	0	0	0	0	0	37	0	0	0	0	0	0	0	0	0	0	0	0	0	0	0	0	0	0	0	0	0	0	0	0	0	0	0	0	0	0	0	0
A_ASV03063	Archaea	Aenigmarchaeota	Deep Sea Euryarchaeotic Group(DSEG)	Un_Deep Sea Euryarchaeotic Group(DSEG)	Un_Deep Sea Euryarchaeotic Group(DSEG)	Un_Deep Sea Euryarchaeotic Group(DSEG)	Un_Deep Sea Euryarchaeotic Group(DSEG)		0	0	0	0	0	0	0	0	0	0	0	0	0	0	0	0	0	0	0	0	0	0	0	0	0	0	0	0	0	0	0	0	0	0	0	0	0	0	0	22	0
A_ASV03046	Archaea	Asgardarchaeota	Lokiarchaeia	Lokiarchaeia	Lokiarchaeia	Lokiarchaeia	Lokiarchaeia		0	0	0	0	0	0	0	0	0	0	0	0	0	0	0	0	0	0	0	0	0	0	0	0	0	0	0	0	0	0	36	0	0	0	0	0	0	0	0	0	0
A_ASV03048	Archaea	Asgardarchaeota	Lokiarchaeia	Lokiarchaeia	Lokiarchaeia	Lokiarchaeia	Lokiarchaeia		0	0	0	0	0	0	0	0	0	0	0	0	0	0	0	0	0	0	0	0	0	0	0	0	0	0	0	0	0	0	0	0	0	36	0	0	0	0	0	0	0
A_ASV03026	Archaea	Crenarchaeota	Bathyarchaeia	Un_Bathyarchaeia	Un_Bathyarchaeia	Un_Bathyarchaeia	Un_Bathyarchaeia		0	0	0	0	0	0	36	0	0	0	0	0	0	0	0	0	0	0	0	0	0	0	0	0	0	0	0	0	0	0	0	0	0	0	0	0	0	0	0	0	0
A_ASV03047	Archaea	Crenarchaeota	Bathyarchaeia	Un_Bathyarchaeia	Un_Bathyarchaeia	Un_Bathyarchaeia	Un_Bathyarchaeia		0	0	0	0	0	0	0	0	0	0	0	0	0	0	0	0	0	0	0	0	0	0	0	0	0	0	0	0	0	0	0	0	36	0	0	0	0	0	0	0	0
A_ASV03049	Archaea	Crenarchaeota	Bathyarchaeia	Un_Bathyarchaeia	Un_Bathyarchaeia	Un_Bathyarchaeia	Un_Bathyarchaeia		0	0	0	0	0	0	0	0	0	0	0	0	0	0	0	0	0	0	0	0	0	0	0	0	0	0	0	0	0	0	0	0	0	36	0	0	0	0	0	0	0
A_ASV03050	Archaea	Crenarchaeota	Bathyarchaeia	Un_Bathyarchaeia	Un_Bathyarchaeia	Un_Bathyarchaeia	Un_Bathyarchaeia		0	0	0	0	0	0	0	0	0	0	0	0	0	0	0	0	0	0	0	0	0	0	0	0	0	0	0	0	0	0	0	0	0	36	0	0	0	0	0	0	0
A_ASV03052	Archaea	Crenarchaeota	Bathyarchaeia	Un_Bathyarchaeia	Un_Bathyarchaeia	Un_Bathyarchaeia	Un_Bathyarchaeia		0	0	0	0	0	0	0	0	0	0	0	0	0	0	0	0	0	0	0	0	0	0	0	0	0	0	0	0	0	0	0	0	0	36	0	0	0	0	0	0	0
A_ASV03066	Archaea	Crenarchaeota	Nitrososphaeria	Caldiarchaeales	Geothermarchaeaceae	Un_Geothermarchaeaceae	Un_Geothermarchaeaceae		0	0	0	0	0	0	0	0	0	0	0	0	0	0	0	0	0	0	0	0	0	0	0	0	0	0	0	0	0	0	0	0	0	0	0	0	0	0	0	0	0
A_ASV03059	Archaea	Crenarchaeota	Nitrososphaeria	Nitrosopumilales	Nitrosopumilaceae	Candidatus Nitrosopumilus	Un_Candidatus Nitrosopumilus		0	0	0	0	0	0	0	0	0	0	0	0	0	0	0	0	0	0	0	0	0	0	0	0	0	0	0	0	0	0	0	0	0	0	0	0	0	0	0	36	0
A_ASV03017	Archaea	Halobacterota	Methanosarcinia	Methanosarciniales	Methanosarcinaceae	Methanosarcina	Un_Methanosarcina		36	0	0	0	0	0	0	0	0	0	0	0	0	0	0	0	0	0	0	0	0	0	0	0	0	0	0	0	0	0	0	0	0	0	0	0	0	0	0	0	0
A_ASV03060	Archaea	Hydrothermarchaeota	Hydrothermarchaeia	Hydrothermarchaeales	Un_Hydrothermarchaeales	Un_Hydrothermarchaeales	Un_Hydrothermarchaeales		0	0	0	0	0	0	0	0	0	0	0	0	0	0	0	0	0	0	0	0	0	0	0	0	0	0	0	0	0	0	0	0	0	0	0	0	0	0	0	36	0
A_ASV03061	Archaea	Un_Archaea	Un_Archaea	Un_Archaea	Un_Archaea	Un_Archaea	Un_Archaea		0	0	0	0	0	0	0	0	0	0	0	0	0	0	0	0	0	0	0	0	0	0	0	0	0	0	0	0	0	0	0	0	0	0	0	0	0	0	0	36	0
A_ASV03033	Archaea	Un_Archaea	Un_Archaea	Un_Archaea	Un_Archaea	Un_Archaea	Un_Archaea		0	0	0	0	0	0	0	0	36	0	0	0	0	0	0	0	0	0	0	0	0	0	0	0	0	0	0	0	0	0	0	0	0	0	0	0	0	0	0	0	0
A_ASV03065	Archaea	Un_Archaea	Un_Archaea	Un_Archaea	Un_Archaea	Un_Archaea	Un_Archaea		0	0	0	0	0	0	0	0	0	0	0	0	0	0	0	0	0	0	0	0	0	0	0	0	0	0	0	0	0	0	0	0	0	0	0	0	0	0	0	0	0
A_ASV03020	Archaea	Nanoarchaeota	Nanoarchaeia	Woesearchaeales	Un_Woesearchaeales	Un_Woesearchaeales	Un_Woesearchaeales		0	18	18	0	0	0	0	0	0	0	0	0	0	0	0	0	0	0	0	0	0	0	0	0	0	0	0	0	0	0	0	0	0	0	0	0	0	0	0	0	0
A_ASV03023	Archaea	Nanoarchaeota	Nanoarchaeia	Woesearchaeales	Un_Woesearchaeales	Un_Woesearchaeales	Un_Woesearchaeales		0	0	0	11	0	0	0	0	0	0	0	0	0	0	0	0	0	25	0	0	0	0	0	0	0	0	0	0	0	0	0	0	0	0	0	0	0	0	0	0	0
A_ASV03036	Archaea	Nanoarchaeota	Nanoarchaeia	Woesearchaeales	Un_Woesearchaeales	Un_Woesearchaeales	Un_Woesearchaeales		0	0	0	0	0	0	0	0	0	0	0	0	36	0	0	0	0	0	0	0	0	0	0	0	0	0	0	0	0	0	0	0	0	0	0	0	0	0	0	0	0
A_ASV03018	Archaea	Nanoarchaeota	Nanoarchaeia	Woesearchaeales	Un_Woesearchaeales	Un_Woesearchaeales	Un_Woesearchaeales		0	36	0	0	0	0	0	0	0	0	0	0	0	0	0	0	0	0	0	0	0	0	0	0	0	0	0	0	0	0	0	0	0	0	0	0	0	0	0	0	0
A_ASV03045	Archaea	Nanoarchaeota	Nanoarchaeia	Woesearchaeales	Un_Woesearchaeales	Un_Woesearchaeales	Un_Woesearchaeales		0	0	0	0	0	0	0	0	0	0	0	0	0	0	0	0	0	0	0	0	36	0	0	0	0	0	0	0	0	0	0	0	0	0	0	0	0	0	0	0	0
A_ASV03053	Archaea	Nanoarchaeota	Nanoarchaeia	Woesearchaeales	Un_Woesearchaeales	Un_Woesearchaeales	Un_Woesearchaeales		0	0	0	0	0	0	0	0	0	0	0	0	0	0	0	0	0	0	0	0	0	0	0	0	0	0	0	0	0	0	0	0	0	36	0	0	0	0	0	0	0
A_ASV03022	Archaea	Thermoplasmatota	Thermoplasmata	Marine Benthic Group D and DHVEG-1	Un_Marine Benthic Group D and DHVEG-1	Un_Marine Benthic Group D and DHVEG-1	Un_Marine Benthic Group D and DHVEG-1		0	0	0	36	0	0	0	0	0	0	0	0	0	0	0	0	0	0	0	0	0	0	0	0	0	0	0	0	0	0	0	0	0	0	0	0	0	0	0	0	0
A_ASV03030	Archaea	Thermoplasmatota	Thermoplasmata	Marine Benthic Group D and DHVEG-1	Un_Marine Benthic Group D and DHVEG-1	Un_Marine Benthic Group D and DHVEG-1	Un_Marine Benthic Group D and DHVEG-1		0	0	0	0	0	0	0	0	36	0	0	0	0	0	0	0	0	0	0	0	0	0	0	0	0	0	0	0	0	0	0	0	0	0	0	0	0	0	0	0	0
A_ASV03067	Archaea	Thermoplasmatota	Thermoplasmata	Marine Benthic Group D and DHVEG-1	Un_Marine Benthic Group D and DHVEG-1	Un_Marine Benthic Group D and DHVEG-1	Un_Marine Benthic Group D and DHVEG-1		0	0	0	0	0	0	0	0	0	0	0	0	0	0	0	0	0	0	0	0	0	0	0	0	0	0	0	0	0	0	0	0	0	0	0	0	0	0	0	0	0
A_ASV03028	Archaea	Thermoplasmatota	Thermoplasmata	Un_Thermoplasmata	Un_Thermoplasmata	Un_Thermoplasmata	Un_Thermoplasmata		0	0	0	0	0	0	0	36	0	0	0	0	0	0	0	0	0	0	0	0	0	0	0	0	0	0	0	0	0	0	0	0	0	0	0	0	0	0	0	0	0
A_ASV03031	Archaea	Thermoplasmatota	Thermoplasmata	Un_Thermoplasmata	Un_Thermoplasmata	Un_Thermoplasmata	Un_Thermoplasmata		0	0	0	0	0	0	0	0	36	0	0	0	0	0	0	0	0	0	0	0	0	0	0	0	0	0	0	0	0	0	0	0	0	0	0	0	0	0	0	0	0
A_ASV03062	Archaea	Thermoplasmatota	Thermoplasmata	Un_Thermoplasmata	Un_Thermoplasmata	Un_Thermoplasmata	Un_Thermoplasmata		0	0	0	0	0	0	0	0	0	0	0	0	0	0	0	0	0	0	0	0	0	0	0	0	0	0	0	0	0	0	0	0	0	0	0	0	0	0	0	26	0
A_ASV03064	Archaea	Thermoplasmatota	Thermoplasmata	Un_Thermoplasmata	Un_Thermoplasmata	Un_Thermoplasmata	Un_Thermoplasmata		0	0	0	0	0	0	0	0	0	0	0	0	0	0	0	0	0	0	0	0	0	0	0	0	0	0	0	0	0	0	0	0	0	0	0	0	0	0	0	0	0
A_ASV03032	Archaea	Thermoplasmatota	Thermoplasmata	SG8-5	Un_SG8-5	Un_SG8-5	Un_SG8-5		0	0	0	0	0	0	0	0	36	0	0	0	0	0	0	0	0	0	0	0	0	0	0	0	0	0	0	0	0	0	0	0	0	0	0	0	0	0	0	0	0
A_ASV03069	Archaea	Asgardarchaeota	Un_Asgardarchaeota	Un_Asgardarchaeota	Un_Asgardarchaeota	Un_Asgardarchaeota	Un_Asgardarchaeota		35	0	0	0	0	0	0	0	0	0	0	0	0	0	0	0	0	0	0	0	0	0	0	0	0	0	0	0	0	0	0	0	0	0	0	0	0	0	0	0	0
A_ASV03070	Archaea	Asgardarchaeota	Un_Asgardarchaeota	Un_Asgardarchaeota	Un_Asgardarchaeota	Un_Asgardarchaeota	Un_Asgardarchaeota		18	0	0	0	0	0	17	0	0	0	0	0	0	0	0	0	0	0	0	0	0	0	0	0	0	0	0	0	0	0	0	0	0	0	0	0	0	0	0	0	0
A_ASV03079	Archaea	Crenarchaeota	Bathyarchaeia	Un_Bathyarchaeia	Un_Bathyarchaeia	Un_Bathyarchaeia	Un_Bathyarchaeia		0	0	0	0	0	0	0	35	0	0	0	0	0	0	0	0	0	0	0	0	0	0	0	0	0	0	0	0	0	0	0	0	0	0	0	0	0	0	0	0	0
A_ASV03105	Archaea	Crenarchaeota	Bathyarchaeia	Un_Bathyarchaeia	Un_Bathyarchaeia	Un_Bathyarchaeia	Un_Bathyarchaeia		0	0	0	0	0	0	0	0	0	0	0	0	0	0	0	0	0	0	0	0	0	0	0	0	0	0	35	0	0	0	0	0	0	0	0	0	0	0	0	0	0
A_ASV03113	Archaea	Crenarchaeota	Bathyarchaeia	Un_Bathyarchaeia	Un_Bathyarchaeia	Un_Bathyarchaeia	Un_Bathyarchaeia		0	0	0	0	0	0	0	0	0	0	0	0	0	0	0	0	0	0	0	0	0	0	0	0	0	0	0	0	0	0	0	0	0	0	0	35	0	0	0	0	0
A_ASV03114	Archaea	Crenarchaeota	Bathyarchaeia	Un_Bathyarchaeia	Un_Bathyarchaeia	Un_Bathyarchaeia	Un_Bathyarchaeia		0	0	0	0	0	0	0	0	0	0	0	0	0	0	0	0	0	0	0	0	0	0	0	0	0	0	0	0	0	0	0	0	0	0	0	35	0	0	0	0	0
A_ASV03120	Archaea	Crenarchaeota	Bathyarchaeia	Un_Bathyarchaeia	Un_Bathyarchaeia	Un_Bathyarchaeia	Un_Bathyarchaeia		0	0	0	0	0	0	0	0	0	0	0	0	0	0	0	0	0	0	0	0	0	0	0	0	0	0	0	0	0	0	0	0	0	0	0	0	0	0	0	35	0
A_ASV03122	Archaea	Crenarchaeota	Bathyarchaeia	Un_Bathyarchaeia	Un_Bathyarchaeia	Un_Bathyarchaeia	Un_Bathyarchaeia		0	0	0	0	0	0	0	0	0	0	0	0	0	0	0	0	0	0	0	0	0	0	0	0	0	0	0	0	0	0	0	0	0	0	0	0	0	0	0	0	35
A_ASV03125	Archaea	Crenarchaeota	Bathyarchaeia	Un_Bathyarchaeia	Un_Bathyarchaeia	Un_Bathyarchaeia	Un_Bathyarchaeia		0	0	0	0	0	0	0	0	0	0	0	0	0	0	0	0	0	0	0	0	0	0	0	0	0	0	0	0	0	0	0	0	0	0	0	0	0	0	0	0	0
A_ASV03094	Archaea	Crenarchaeota	Nitrososphaeria	Caldiarchaeales	Geothermarchaeaceae	Un_Geothermarchaeaceae	Un_Geothermarchaeaceae		0	0	0	0	0	0	0	0	0	0	0	0	0	35	0	0	0	0	0	0	0	0	0	0	0	0	0	0	0	0	0	0	0	0	0	0	0	0	0	0	0
[truncated: 3,619 more rows]
[truncated: 4 more columns]

## Sheet: Table S6b
Table S6b: Taxonomy and raw read counts for Bacteria samples.
[truncated: 7,210 more rows]
[truncated: 3 more columns]

[truncated: 1 more sheets: Table S6c]
